# Supplementary material for: Food sources of energy and nutrients among Canadian adults following a gluten-free diet
Source: PeerJ. 2020 Jul 27;8:e9590. doi: 10.7717/peerj.9590 (PMC7391969; doi:10.7717/peerj.9590)
Supplement: Supplemental Information 2 — Nutrient contents for each food item is presented, with corresponding food group codes for analyses. [file peerj-08-9590-s002.xlsx]

## Sheet: Data
	Food	serving	no_serv	Grams	Day	Meal	kcal	pro	cho	fibre	tsugar	tfat	sfa	chol	calcium	iron	magn	pot	sodium	vita	vitc	vitd	vite	thiamin	ribo	niacin	folate	facid	foodfol	dfe	vitb6	vitb12	linacid6	linacid3	BNSCode	BNSsub	FGCAT	FGSub	Wgcat
	Gluten Free Oats - Only Oats	1 cup (40g)	0.021	0.84	Day 2	Dinner - 6:00pm	6.3	0.252	1.134	0.168	0.042	0.105	0	0	0.84	0.0252	0.2434	0.6888	0	0	0	0	0	0.001	0	0.00157	0.0924	0	0.0924	0.0924	0	0	0.00294	0	5	A	100	108	1
	Gluten Free Oats - Only Oats	grams	2	2	Day 2	Lunch - 11:00am	15	0.6	2.7	0.4	0.1	0.25	0	0	2	0.06	0.58	1.64	0	0	0	0	0	0.0024	0	0.00374	0.22	0	0.22	0.22	0	0	0.007	0	5	A	100	108	1
	Gluten Free Oats - Only Oats	grams	2	2	Day 3	Dinner	15	0.6	2.7	0.4	0.1	0.25	0	0	2	0.06	0.58	1.64	0	0	0	0	0	0.0024	0	0.00374	0.22	0	0.22	0.22	0	0	0.007	0	5	A	100	108	1
	Gluten Free Oats - Only Oats	1 cup (40g)	0.125	5	Day 3	Breakfast - 6:00am	37.5	1.5	6.75	1	0.25	0.625	0	0	5	0.15	1.45	4.1	0	0	0	0	0	0.006	0	0.00935	0.55	0	0.55	0.55	0	0	0.0175	0	5	A	100	108	1
	Gluten Free Oats - Only Oats	1 cup (40g)	0.25	10	Day 3	Breakfast - 10:30am	75	3	13.5	2	0.5	1.25	0	0	10	0.3	2.9	8.2	0	0	0	0	0	0.012	0	0.0187	1.1	0	1.1	1.1	0	0	0.035	0	5	A	100	108	1
	Gluten Free Oats - Only Oats	1 cup (40g)	0.25	10	Day 2	Dinner - 6:00pm	75	3	13.5	2	0.5	1.25	0	0	10	0.3	2.9	8.2	0	0	0	0	0	0.012	0	0.0187	1.1	0	1.1	1.1	0	0	0.035	0	5	A	100	108	1
	Gluten Free Oats - Only Oats	1 cup (40g)	0.25	10	Day 2	Breakfast - 6:45am	75	3	13.5	2	0.5	1.25	0	0	10	0.3	2.9	8.2	0	0	0	0	0	0.012	0	0.0187	1.1	0	1.1	1.1	0	0	0.035	0	5	A	100	108	1
	Gluten Free Oats - Only Oats	1 cup (40g)	0.333	13.32	Day 2	Breakfast - 8:50am	99.9	3.996	18	2.664	0.666	1.665	0	0	13.3	0.395	3.865	10.94	0	0	0	0	0	0.016	0	0.024945	1.4675	0	1.4675	1.4675	0	0	0.0467	0	5	A	100	108	1
	Gluten Free Oats - Only Oats	1 cup (40g)	0.333	13.32	Day 3	Breakfast - 8:30am	99.9	3.996	18	2.664	0.666	1.665	0	0	13.3	0.395	3.865	10.94	0	0	0	0	0	0.016	0	0.024945	1.4675	0	1.4675	1.4675	0	0	0.0467	0	5	A	100	108	1
	Gluten Free Oats - Only Oats	1 cup (40g)	0.5	20	Day 1	Breakfast - 8:30am	150	6	27	4	1	2.5	0	0	20	0.6	5.8	16.4	0	0	0	0	0	0.024	0	0.0374	2.2	0	2.2	2.2	0	0	0.07	0	5	A	100	108	1
	Gluten Free Oats - Only Oats	1 cup (40g)	0.5	20	Day 1	Breakfast - 7:15	150	6	27	4	1	2.5	0	0	20	0.6	5.8	16.4	0	0	0	0	0	0.024	0	0.0374	2.2	0	2.2	2.2	0	0	0.07	0	5	A	100	108	1
	Gluten Free Oats - Only Oats	1 cup (40g)	0.66	26.4	Day 1	Breakfast	198	7.92	35.6	5.28	1.32	3.3	0	0	26.4	0.792	7.656	21.648	0	0	0	0	0	0.0317	0	0.0494	2.904	0	2.904	2.904	0	0	0.0924	0	5	A	100	108	1
	Gluten Free Oats - Only Oats	1 cup (40g)	0.66	26.4	Day 2	Breakfast	198	7.92	35.6	5.28	1.32	3.3	0	0	26.4	0.792	7.656	21.648	0	0	0	0	0	0.0317	0	0.0494	2.904	0	2.904	2.904	0	0	0.0924	0	5	A	100	108	1
	Gluten Free Oats - Only Oats	1 cup (40g)	0.667	26.68	Day 1	Breakfast - 6:30am	200.1	8.004	36	5.336	1.334	3.335	0	0	26.7	0.8004	7.73	21.88	0	0	0	0	0	0.032	0	0.04989	2.935	0	2.935	2.935	0	0	0.0934	0	5	A	100	108	1
	Gluten Free Oats - Only Oats	1 cup (40g)	0.667	26.68	Day 1	Breakfast - 8:30am	200.1	8.004	36	5.336	1.334	3.335	0	0	26.7	0.79	7.73	21.88	0	0	0	0	0	0.032	0	0.04989	2.935	0	2.935	2.935	0	0	0.0934	0	5	A	100	108	1
	Gluten Free Oats - Only Oats	grams	28	28	Day 2	Breakfast - 9:00am	210	8.4	37.8	5.6	1.4	3.5	0	0	28	0.84	8.12	22.96	0	0	0	0	0	0.0336	0	0.0524	3.08	0	3.08	3.08	0	0	0.098	0	5	A	100	108	1
	Gluten Free Oats - Only Oats	grams	50	50	Day 2	Breakfast - 6:45am	375	15	67.5	10	2.5	6.25	0	0	50	1.5	14.5	41	0	0	0	0	0	0.06	0	0.0935	5.5	0	5.5	5.5	0	0	0.175	0	5	A	100	108	1
	Gluten Free Oats - Only Oats	grams	50	50	Day 3	Breakfast - 6:45am	375	15	67.5	10	2.5	6.25	0	0	50	1.5	14.5	41	0	0	0	0	0	0.06	0	0.0935	5.5	0	5.5	5.5	0	0	0.175	0	5	A	100	108	1
	Gluten Free Oats - Only Oats	1 cup (40g)	1.5	60	Day 2	Breakfast - 8:30am	450	18	81	12	3	7.5	0	0	60	1.848	17.4	49.2	0	0	0	0	0	0.072	0	0.1122	6.6	0	6.6	6.6	0	0	0.21	0	5	A	100	108	1
	Lotus Fine Foods - Coconut and Cherry Quinoa Granola	grams	10	10	Day 2	Breakfast - 8:00am	60	0.2	5.667	1	1.667	4	1.333	0	20	0.48	12.4	38.4	1.333	0	0	0	0.588	0.0146	0.0101333	0.2252	0.6	0.3	0.6	1.1	0.0136	0	0.183333	0.0149333	6	A	100	108	1
	Rice Works - Rice Chips	grams	14	14	Day 1	Lunch - 11:30am	70	1	9	0.5	0.0154	3	0.11704	0	10	0.18	3.22	14.98	52.5	0	0	0	0.0952	0.00896	0.00644	0.20832	0.98	0	0.98	0.98	0.02128	0	0.32032	0.0448	4	B	100	106	1
	Sweet Chili Gourmet Rice Crisps - Riceworks	grams	60	60	Day 3	Snack 1 - 9:00pm	300	4.286	40.7	2.143	2.143	12.9	1	0	42.9	0.92	78.6	0	364.3	0	0	0	3.924	0.0366	0.099	4.68	12.6	0	12.6	12.6	0.09	0	0.582	0.006	4	B	100	106	1
	Sweet Chili Gourmet Rice Crisps - Riceworks	grams	60	60	Day 3	Snack 2 - 10:00pm	300	4.286	40.7	2.143	2.143	12.9	1	0	42.9	0.92	78.6	0	364.3	0	0	0	3.924	0.0366	0.099	4.68	12.6	0	12.6	12.6	0.09	0	0.582	0.006	4	B	100	106	1
	Rice Works - Rice Chips	grams	60	60	Day 2	Dinner - 7:30pm	300	4.286	38.6	2.143	0.066	12.9	0.5016	0	42.9	0.772	13.8	64.2	225	0	0	0	0.408	0.0384	0.0276	0.8928	4.2	0	4.2	4.2	0.0912	0	1.3728	0.192	4	B	100	106	1
	Mary's Organic Crackers - Black Pepper	1 cracker (2.35g)	8	18.8	Day 1	Lunch - 12:30pm	88	1.96552	16	1.96552	0	3.27586	0.327586	0	26.2069	0.550345	19	96	112	0	0	0	0.176897	0.0687931	0	0.923793	6.55172	0	6.55172	6.55172	0.0727241	0	0.294828	0	4	B	100	106	1
	Mary's Organic Crackers - Black Pepper	grams	30	30	Day 2	Lunch - 4:00pm	140.4	3	25.5	3	0	5	0.5	0	40	0.84	29	153.2	178.7	0	0	0	0	0.105	0	1.41	10	0	10	10	0.111	0	0.45	0	4	B	100	106	1
	Mary's Organic Crackers - Black Pepper	grams	29	29	Day 2	Lunch - 11:30am	135.7	3	24.7	3	0	5	0.5	0	40	0.84	29	148.1	172.8	0	0	0	0.27	0.105	0	1.41	10	0	10	10	0.111	0	0.45	0	4	B	100	106	1
	Mary's Organic Crackers - Original Crackers	grams	34	34	Day 3	Lunch - 12:30pm	158.7	3.4	23.8	3.4	0	5.667	1.133	0	45.3	0.95	37.9231	181.3	215.3	0	0	0	0.353077	0.137308	0	1.84385	13.0769	0	13.0769	13.0769	0.145154	0	0.588462	0	4	B	100	106	1
	Mary's Organic Crackers - Original Crackers	grams	26	26	Day 2	Lunch - 12:00pm	121.3	2.6	18.2	2.6	0	4.333	0.867	0	34.7	0.64	26	138.7	164.7	0	0	0	0.242069	0.0941379	0	1.26414	8.96552	0	8.96552	8.96552	0.0995172	0	0.403448	0	4	B	100	106	1
	Mary's Organic Crackers - Jalapeno	grams	31	31	Day 3	Lunch - 11:30am	142.1	3	25.8	3	0	5	0.5	0	40	0.84	29	180.8	232.5	20	0	0	0	0.105	0	1.41	10	0	10	10	0.111	0	0.45	0	4	B	100	106	1
	Enerjive - Quinoa Rock Salt Crackers	grams	34	34	Day 1	Dinner - 6:00pm	151.1	3.778	21.4	2.518	2.518	6.296	0.63	0	25.2	1.41	27.0661	73.1	94.4	0	0	0	0.215333	0.221515	0.102	2.31818	10.2	0	10.2	10.2	0.0906667	0	0.565636	0.0360606	4	B	100	106	1
	Bob's Red Mill - Gluten Free Muesli - Corrected	1/2 cup (29g)	0.126	3.65	Day 2	Snack 1 - 10:30am	15.1	0.504	2.394	0.378	0.504	0.378	0.126	0	2.52	0.136		17.9983	1.096	0	0.044	0	0	0.0203632	0	0.0316782	0.131667	0	0.131667	0.131667	0.00365	0	0.0850066	0	5	A	100	108	1
	Bob's Red Mill - Quick Oats Gluten Free	1 cup (90g)	0.188	16.92	Day 1	Lunch - 2:00pm	67.7	2.632	10.9	1.88	0.376	1.128	0.188	0	7.52	0.677	20.6944	54.3056	0.9	0	0	0	0.0630556	0.0688889	0.0233333	0.168889	4.80556	0	4.80556	4.80556	0.015	0	0.33	0.015	5	A	100	108	1
	Qi'a Honey Chia Superflakes - Nature's Path	grams	20	20	Day 1	Breakfast - 8:15am	80	1.818	15.6	2.545	2.182	1.091	0	0	14.5	2.618	25	87.3	25.5	0	0	0	0.1	0.066	0.012	0.899	5	0	5	5	0	0.065	0.267	0.012	5	A	100	108	1
	Good Thins - Sea Salt and Pepper Crackers	grams	45	45	Day 2	Dinner - 7:45pm	180	2.25	38.2	4.5	0	3	0	0	0	0.81	58.95	130.5	168.8	0	0	0	2.94	0.0275	0	3.51	9.45	0	9.45	9.45	0.0675	0	0.437	0.0045	4	B	100	106	1
	Bob's Red Mill - Quick Oats Gluten Free	1 cup (90g)	1	90	Day 2	Breakfast - 6:15am	360	14	58	10	2	6	1	0	40	3.6	124.167	325.833	5.4	0	0	0	0.378333	0.413333	0.14	1.01333	28.8333	0	28.8333	28.8333	0.09	0	1.98	0.09	5	A	100	108	1
	Bob's Red Mill - Quick Oats Gluten Free	1 cup (90g)	1	90	Day 3	Breakfast	360	14	58	10	2	6	1	0	40	3.6	124.167	325.833	5.4	0	0	0	0.378333	0.413333	0.14	1.01333	28.8333	0	28.8333	28.8333	0.09	0	1.98	0.09	5	A	100	108	1
	Qia Gluten Free Cinnamon Pumpkin Seed Oatmeal - Nature's Path Organic	1 package (38g)	1	38	Day 1	Breakfast	150	6	24	5	1	4	1	0	20	1.68	51.3	115	0	0	0	0	0	0.212	0	0.3298	18.62	0	18.62	18.62	0.038	0	0.885	0	5	A	100	108	1
	Qia Gluten Free Cinnamon Pumpkin Seed Oatmeal - Nature's Path Organic	1 package (38g)	1	38	Day 2	Breakfast - 9:10am	150	6	24	5	1	4	1	0	20	1.68	51.3	115	0	0	0	0	0	0.212	0	0.3298	18.62	0	18.62	18.62	0.038	0	0.885	0	5	A	100	108	1
	Qia Gluten Free Cinnamon Pumpkin Seed Oatmeal - Nature's Path Organic	1 package (38g)	1	38	Day 3	Lunch - 3:00pm	150	6	24	5	1	4	1	0	20	1.68	51.3	115	0	0	0	0	0	0.212	0	0.3298	18.62	0	18.62	18.62	0.038	0	0.885	0	5	A	100	108	1
	Cereal, Oats, Rolled, Oatmeal, Regular/Quick/Instant, not fortified, dry	.333 cup (27g)	2	54	Day 3	Breakfast	204.7	7.101	36.6	5.454	0.535	3.521	0.599	0	28.1	1.4	74.5	195.5	3.24	0	0	0	0.227	0.248	0.084	0.608	17.3	0	17.3	17.3	0.054	0	1.188	0.054	5	A	100	108	1
	Cereal, Oats, Rolled, Oatmeal, Regular/Quick/Instant, not fortified, dry	.333 cup (27g)	1	27	Day 1	Breakfast - 7:30am	102.3	3.551	18.3	2.727	0.267	1.76	0.3	0	14	0.7	37.3	97.7	1.62	0	0	0	0.113	0.124	0.042	0.304	8.64	0	8.64	8.64	0.027	0	0.594	0.027	5	A	100	108	1
	Cereal, Oats, Rolled, Oatmeal, Regular/Quick/Instant, not fortified, dry	.333 cup (27g)	1	27	Day 2	Breakfast - 7:15am	102.3	3.551	18.3	2.727	0.267	1.76	0.3	0	14	0.7	37.3	97.7	1.62	0	0	0	0.113	0.124	0.042	0.304	8.64	0	8.64	8.64	0.027	0	0.594	0.027	5	A	100	108	1
	Only Oats - Wheat Free Steel Cut Oats	1/3 cup (45g)	1	45	Day 3	Breakfast - 9:00am	170	6	30	5	1	3	1	0	20	1.665	13.05	36.9	15	0	0	0	0	0.054	0	0.08415	4.95	0	4.95	4.95	0	0	0.1575	0	5	A	100	108	1
	Only Oats - Wheat Free Steel Cut Oats	1/3 cup (45g)	3	135	Day 3	Breakfast - 7:00am	510	18	90	15	3	9	3	0	60	4.995	39.15	110.7	45	0	0	0	0	0.162	0	0.25245	14.85	0	14.85	14.85	0	0	0.4725	0	5	A	100	108	1
	Brown Rice Puff Cereal - Simple Treasures	grams	30	30	Day 2	Breakfast - 8:30am	112.5	1.875	24.4	0	0	0.938	0	0	0	0.675	21.6	34.8	0	0	0	0	0	0.0237	0.011	0.44	9.9	0	9.9	9.9	0.0507	0	0	0	5	A	100	108	1
	Brown Rice Puff Cereal - Simple Treasures	grams	30	30	Day 3	Breakfast - 8:00am	112.5	1.875	24.4	0	0	0.938	0	0	0	0.675	21.6	34.8	0	0	0	0	0	0.0237	0.011	0.44	9.9	0	9.9	9.9	0.0507	0	0	0	5	A	100	108	1
	Nature's Path - Gluten free Crispy rice	grams	70	70	Day 1	Breakfast - 6:10am	256.9	4.9	56	4.9	4.9	3.5	0	0	0	1.96	25.2	228.2	373.33	0	0	0	0	1.764	0	9.513	0	0	0	0	0	0	0	0	6	A	100	108	1
	Nature's Path - Gluten free Crispy rice	grams	72	72	Day 1	Breakfast - 6:10am	264.2	5.04	57.6	5.04	5.04	3.6	0	0	0	2.016	25.92	234.72	368.637	0	0	0	0	1.8144	0	9.7824	0	0	0	0	0	0	0	0	6	A	100	108	1
	Nature's Path - Gluten free Crispy rice	grams	75	75	Day 2	Breakfast - 7:57am	275.2	5.25	60	5.25	5.25	3.75	0	0	0	2.1	27	244.5	383.997	0	0	0	0	1.89	0	10.19	0	0	0	0	0	0	0	0	6	A	100	108	1
	Nature's Path - Gluten free Crispy rice	grams	75	75	Day 3	Breakfast - 8:46am	275.2	5.25	60	5.25	5.25	3.75	0	0	0	2.1	27	244.5	383.997	0	0	0	0	1.89	0	10.19	0	0	0	0	0	0	0	0	6	A	100	108	1
	Gluten Free Sunrise Crunchy Maple Cereal - Nature's Path Organic	ounces	2.93	83.07	Day 3	Breakfast - 8:30am	304.6	5.538	69.2	8.307	19.4	2.769	0	0	55.4	2.4	92.13	339.47	360	0	0	0	0	0.141	0	2.736	11.62	0	11.62	11.62	0.0614	0	0	0	5	A	100	108	1
	Gluten Free Sunrise Crunchy Maple Cereal - Nature's Path Organic	0.67 cup (30g)	0.5	15	Day 1	Breakfast - 7:30am	55	1	12.5	1.5	3.5	0.5	0	0	10	0.36	16.5	61.5	65	0	0	0	0	0.0255	0	0.513	2	0	2	2	0.022	0	0	0	5	A	100	108	1
	Gluten Free Sunrise Crunchy Maple Cereal - Nature's Path Organic	0.67 cup (30g)	0.5	15	Day 2	Breakfast - 7:15am	55	1	12.5	1.5	3.5	0.5	0	0	10	0.36	16.5	61.5	65	0	0	0	0	0.0255	0	0.513	2	0	2	2	0.022	0	0	0	5	A	100	108	1
	Gluten Free Sunrise Crunchy Maple Cereal - Nature's Path Organic	0.67 cup (30g)	0.5	15	Day 2	Breakfast - 8:50am	55	1	12.5	1.5	3.5	0.5	0	0	10	0.36	16.65	61.35	65	0	0	0	0	0.0254819	0	0.494458	2.1	0	2.1	2.1	0.0110964	0	0	0	5	A	100	108	1
	Gluten Free Sunrise Crunchy Maple Cereal - Nature's Path Organic	0.67 cup (30g)	0.5	15	Day 3	Breakfast - 8:30am	55	1	12.5	1.5	3.5	0.5	0	0	10	0.36	16.65	61.35	65	0	0	0	0	0.0254819	0	0.494458	2.1	0	2.1	2.1	0.0110964	0	0	0	5	A	100	108	1
	Gluten Free Sunrise Crunchy Maple Cereal - Nature's Path Organic	0.67 cup (30g)	1	30	Day 1	Breakfast - 8:30am	110	2	25	3	7	1	0	0	20	0.72	33.3	122.7	130	0	0	0	0	0.0509639	0	0.988916	4.2	0	4.2	4.2	0.0221928	0	0	0	5	A	100	108	1
	Gluten Free Sunrise Crunchy Maple Cereal - Nature's Path Organic	0.67 cup (30g)	1	30	Day 2	Breakfast - 7:28am	110	2	25	3	7	1	0	0	20	0.72	33.3	122.7	130	0	0	0	0	0.0509639	0	0.988916	4.2	0	4.2	4.2	0.0221928	0	0	0	5	A	100	108	1
	Gluten Free Sunrise Crunchy Maple Cereal - Nature's Path Organic	0.67 cup (30g)	1	30	Day 3	Breakfast - 7:34am	110	2	25	3	7	1	0	0	20	0.72	33.3	122.7	130	0	0	0	0	0.0509639	0	0.988916	4.2	0	4.2	4.2	0.0221928	0	0	0	5	A	100	108	1
	Quaker - Gluten Free Quick Oats	1/3 cup (30g)	1	30	Day 1	Breakfast - 8:30am	110	4	20	3	0.297222	1.95611	0.332778	0	20	0.246	41.3889	108.611	1.8	0	0	0	0.126111	0.137778	0.0466667	0.337778	9.61111	0	9.61111	9.61111	0.03	0	0.66	0.03	5	A	100	108	1
	Quaker - Gluten Free Quick Oats	1/3 cup (30g)	1	30	Day 2	Breakfast - 7:28am	110	4	20	3	0.297222	1.95611	0.332778	0	20	0.246	41.3889	108.611	1.8	0	0	0	0.126111	0.137778	0.0466667	0.337778	9.61111	0	9.61111	9.61111	0.03	0	0.66	0.03	5	A	100	108	1
	Quaker - Gluten Free Quick Oats	1/3 cup (30g)	1	30	Day 3	Breakfast - 7:34am	110	4	20	3	0.297222	1.95611	0.332778	0	20	0.246	41.3889	108.611	1.8	0	0	0	0.126111	0.137778	0.0466667	0.337778	9.61111	0	9.61111	9.61111	0.03	0	0.66	0.03	5	A	100	108	1
	Compliments - GF waffles	2 waffles (81g)	1	81	Day 1	Dinner - 7:25pm	200	1	35	2	4	6	1	0	10.15	0.42	92.34	222.75	400	0	0	0	0	0.06	0.084	5.21	5.39	0	5.39	5.39	0	0	0	0	4	D	100	107	1
	Compliments - GF waffles	grams	150	150	Day 3	Breakfast - 7:30am	370	1.85	64.75	3.7	7.4	11.1	1.85	0	18.7775	0.777	170.829	412.088	740	0	0	0	0	0.111	0.1554	9.6385	9.9715	0	9.9715	9.9715	0	0	0	0	4	D	100	107	1
	Gluten Free Rice Flour Wrap - Western Family	1 wrap (60g)	1	60	Day 3	Lunch - 1:00pm	145	4	22	7	7	7	0	0	40	0.51	47.76	129	254	0	0	0	0.38	0.39	0.18	4.09	18	0	18	18	0.16	0	0.998	0.0636	4	A	100	105	1
	Gluten Free Rice Flour Wrap - Western Family	1 wrap (60g)	1	60	Day 1	Lunch - 1:30pm	145	4	22	7	7	7	0	0	40	0.51	47.76	129	254	0	0	0	0.38	0.39	0.18	4.09	18	0	18	18	0.16	0	0.998	0.0636	4	A	100	105	1
	Bfree - Gluten Free Wraps	1 wrap (42g)	1	42	Day 2	Breakfast - 9:00am	100	2	22	6	2	1	0.2	0	40	0.72	33.4345	90.3	300	0	0	0	0.266	0.273636	0.126	2.86364	12.6	0	12.6	12.6	0.112	0	0.698727	0.0445455	4	A	100	105	1
	Glutenull Bakery - Gluten Free Buckwheat Bread	grams	40	40	Day 2	Lunch - 11:45am	90	2.25	16.9	2.25	0	1.125	0	0	2.25	0.28	31.8424	86	101.2	0	0	0	0.253333	0.260606	0.12	2.72727	12	0	12	12	0.106667	0	0.665455	0.0424242	3	B	100	104	1
	Glutenull Bakery - Gluten Free Buckwheat Bread	1 slice (40g)	1	40	Day 1	Lunch - 1:00pm	90	2.25	16.9	2.25	0	1.125	0	0	2.25	0.28	31.8424	86	101.2	0	0	0	0.253333	0.260606	0.12	2.72727	12	0	12	12	0.106667	0	0.665455	0.0424242	3	B	100	104	1
	Glutenull Bakery - Gluten Free Buckwheat Bread	1 slice (40g)	1	40	Day 3	Lunch - 2:30pm	90	2.25	16.9	2.25	0	1.125	0	0	2.25	0.28	31.8424	86	101.2	0	0	0	0.253333	0.260606	0.12	2.72727	12	0	12	12	0.106667	0	0.665455	0.0424242	3	B	100	104	1
	Gluten Free Plain Bagel - Udis	grams	79	79	Day 3	Breakfast - 7:30am	168.4	4.912	26	1.403	2.807	4.912	0	0	14	0.506	35.2	63.2	280.7	0	0	0	0	0.081	0.0097	1.25	3.2	0	3.2	3.2	0	0	0	0	4	F	100	107	1
	Gluten Free Plain Bagel - Udis	1 bagel (114g)	1	114	Day 2	Lunch	240	7	37	2	4	7	0	0	20	0.72	50.6	90.85	400	0	0	0	0	0.117	0.014	1.53	4.6	0	4.6	4.6	0	0	0	0	4	F	100	107	1
	Gluten Free Plain Bagel - Udis	grams	80	80	Day 3	Lunch	168.4	4.912	26	1.403	2.807	4.912	0	0	14	0.506	35.2	63.2	280.7	0	0	0	0	0.081	0.0097	1.25	3.2	0	3.2	3.2	0	0	0	0	4	F	100	107	1
	Natures Path - Whole O's Cereal	grams	45	45	Day 1	Breakfast - 8:00am	74.2	1.35	16.6	1.8	2.7	0.9	0	0	30.0361	0.486	49.95	60.8	77.4	0	0	0	0	0.0764458	0	1.48337	6.3	0	6.3	6.3	0.0332892	0	0	0	5	A	100	108	1
	Natures Path - Whole O's Cereal	grams	45	45	Day 3	Breakfast - 8:30am	74.2	1.35	16.6	1.8	2.7	0.9	0	0	30.0361	0.486	49.95	60.8	77.4	0	0	0	0	0.0764458	0	1.48337	6.3	0	6.3	6.3	0.0332892	0	0	0	5	A	100	108	1
	Grains, quinoa, cooked / Grains céréaliers, quinoa, cuit	100 grams (100g)	0.75	75	Day 3	Lunch - 12:30pm	90	3.3	16	2.1	0	1.44	0.113	0	12.8	1.118	48	129	5.25	0	0	0	0	0.08	0.082	0.309	31.5	0	31.5	31.5	0.092	0	0.996429	0.0870536	160	A	100	103	1
	Grains, quinoa, cooked / Grains céréaliers, quinoa, cuit	grams	95	95	Day 2	Dinner - 6:00pm	114	4.18	20.2	2.66	0	1.824	0.143	0	16.2	1.416	60.8	163.4	6.65	0	0	0	0	0.102	0.104	0.391	39.9	0	39.9	39.9	0.117	0	0.744	0.065	160	A	100	103	1
	Grains, quinoa, cooked / Grains céréaliers, quinoa, cuit	grams	100	100	Day 1	Lunch - 12:45pm	120	4.4	21.3	2.8	0	1.92	0.151	0	17	1.49	64	172	7	0	0	0	0	0.107	0.11	0.412	42	0	42	42	0.123	0	2.976	0.26	160	A	100	103	1
	Grains, quinoa, cooked / Grains céréaliers, quinoa, cuit	1 ounce (28.35g)	2	56.7	Day 1	Dinner - 7:00pm	68	2.495	12.1	1.588	0	1.089	0.086	0	9.639	0.845	36.3	97.5	3.969	0	0	0	0	0.061	0.062	0.234	23.8	0	23.8	23.8	0.07	0	0.744	0.065	160	A	100	103	1
	Grains, millet, cooked / Grains céréaliers, millet, cuit	250ml (183.85g)	1	183.85	Day 3	Breakfast - 7:00am	218.8	6.453	43.5	5.387	0.239	1.839	0.316	0	5.516	1.158	80.9	114	3.677	0	0	0	0.037	0.195	0.151	2.445	34.9	0	34.9	34.9	0.199	0	0.883	0.051	160	A	100	103	1
	Grains, rice, brown, medium-grain, cooked / Grains céréaliers, riz brun, grain moyen, cuit	1 ounce (28.35g)	1	28.35	Day 3	Dinner - 8:00pm	31.8	0.658	6.665	0.541	0.099	0.235	0.047	0	2.835	0.15	12.5	22.4	0.284	0	0	0	0.009	0.029	0.003	0.377	1.134	0	1.134	1.134	0.042	0	0.08	0.004	1	B	100	102	1
	Grains, rice, brown, medium-grain, cooked / Grains céréaliers, riz brun, grain moyen, cuit	ounces	3	85.05	Day 3	Dinner - 7:00pm	95.3	1.973	20	1.624	0.298	0.706	0.14	0	8.505	0.451	37.4	67.2	0.85	0	0	0	0.026	0.087	0.01	1.131	3.402	0	3.402	3.402	0.127	0	0.241	0.011	1	B	100	102	1
	Grains, rice, brown, medium-grain, cooked / Grains céréaliers, riz brun, grain moyen, cuit	1 ounce (28.35g)	3	85.05	Day 2	Lunch - 11:45am	95.3	1.973	20	1.624	0.298	0.706	0.14	0	8.505	0.451	37.4	67.2	0.85	0	0	0	0.026	0.087	0.01	1.131	3.402	0	3.402	3.402	0.127	0	0.241	0.011	1	B	100	102	1
	Grains, rice, brown, medium-grain, cooked / Grains céréaliers, riz brun, grain moyen, cuit	grams	133	133	Day 3	Lunch - 12:00pm	149	3.086	31.3	2.54	0.466	1.104	0.219	0	13.3	0.705	58.5	105.1	1.33	0	0	0	0.04	0.136	0.016	1.769	5.32	0	5.32	5.32	0.198	0	0.376	0.017	1	B	100	102	1
	Grains, rice, brown, medium-grain, cooked / Grains céréaliers, riz brun, grain moyen, cuit	grams	104	104	Day 3	Dinner - 6:30pm	116.5	2.413	24.5	1.986	0.364	0.863	0.172	0	10.4	0.551	45.8	82.2	1.04	0	0	0	0.031	0.106	0.012	1.383	4.16	0	4.16	4.16	0.155	0	0.294	0.014	1	B	100	102	1
	Grains, rice, brown, medium-grain, cooked / Grains céréaliers, riz brun, grain moyen, cuit	grams	55	55	Day 3	Dinner - 6:00pm	61.6	1.276	12.9	1.05	0.192	0.456	0.091	0	5.5	0.292	24.2	43.4	0.55	0	0	0	0.016	0.056	0.007	0.732	2.2	0	2.2	2.2	0.082	0	0.156	0.007	1	B	100	102	1
	Grains, rice, brown, medium-grain, cooked / Grains céréaliers, riz brun, grain moyen, cuit	100 grams (100g)	1	100	Day 3	Dinner - 6:30pm	112	2.32	23.5	1.91	0.35	0.83	0.165	0	10	0.53	44	79	1	0	0	0	0.03	0.102	0.012	1.33	4	0	4	4	0.149	0	0.283	0.013	1	B	100	102	1
	Grains, rice, brown, medium-grain, cooked / Grains céréaliers, riz brun, grain moyen, cuit	100 grams (100g)	1	100	Day 1	Dinner - 7:00pm	112	2.32	23.5	1.91	0.35	0.83	0.165	0	10	0.53	44	79	1	0	0	0	0.03	0.102	0.012	1.33	4	0	4	4	0.149	0	0.283	0.013	1	B	100	102	1
	Grains, rice, brown, medium-grain, cooked / Grains céréaliers, riz brun, grain moyen, cuit	100 grams (100g)	1	100	Day 1	Dinner - 6:00pm	112	2.32	23.5	1.91	0.35	0.83	0.165	0	10	0.53	44	79	1	0	0	0	0.03	0.102	0.012	1.33	4	0	4	4	0.149	0	0.283	0.013	1	B	100	102	1
	Grains, rice, brown, medium-grain, cooked / Grains céréaliers, riz brun, grain moyen, cuit	100 grams (100g)	1	100	Day 1	Dinner - 8:30pm	112	2.32	23.5	1.91	0.35	0.83	0.165	0	10	0.53	44	79	1	0	0	0	0.03	0.102	0.012	1.33	4	0	4	4	0.149	0	0.283	0.013	1	B	100	102	1
	Grains, rice, brown, medium-grain, cooked / Grains céréaliers, riz brun, grain moyen, cuit	100 grams (100g)	1	100	Day 2	Dinner - 6:00pm	112	2.32	23.5	1.91	0.35	0.83	0.165	0	10	0.53	44	79	1	0	0	0	0.03	0.102	0.012	1.33	4	0	4	4	0.149	0	0.283	0.013	1	B	100	102	1
	Grains, rice, brown, medium-grain, cooked / Grains céréaliers, riz brun, grain moyen, cuit	100 grams (100g)	1	100	Day 3	Lunch - 12:45pm	112	2.32	23.5	1.91	0.35	0.83	0.165	0	10	0.53	44	79	1	0	0	0	0.03	0.102	0.012	1.33	4	0	4	4	0.149	0	0.283	0.013	1	B	100	102	1
	Grains, rice, brown, medium-grain, cooked / Grains céréaliers, riz brun, grain moyen, cuit	grams	150	150	Day 2	Lunch - 1:00pm	168	3.48	35.3	2.865	0.525	1.245	0.248	0	15	0.795	66	118.5	1.5	0	0	0	0.045	0.153	0.018	1.995	6	0	6	6	0.224	0	0.424	0.02	1	B	100	102	1
	Grains, rice, brown, medium-grain, cooked / Grains céréaliers, riz brun, grain moyen, cuit	100 grams (100g)	1.5	150	Day 2	Dinner - 6:00pm	168	3.48	35.3	2.865	0.525	1.245	0.248	0	15	0.795	66	118.5	1.5	0	0	0	0.045	0.153	0.018	1.995	6	0	6	6	0.224	0	0.424	0.02	1	B	100	102	1
	Grains, rice, brown, medium-grain, cooked / Grains céréaliers, riz brun, grain moyen, cuit	100 grams (100g)	1.5	150	Day 3	Lunch - 12:00pm	168	3.48	35.3	2.865	0.525	1.245	0.248	0	15	0.795	66	118.5	1.5	0	0	0	0.045	0.153	0.018	1.995	6	0	6	6	0.224	0	0.424	0.02	1	B	100	102	1
	Grains, rice, brown, medium-grain, cooked / Grains céréaliers, riz brun, grain moyen, cuit	grams	150	150	Day 1	Dinner - 7:00pm	168	3.48	35.3	2.865	0.525	1.245	0.248	0	15	0.795	66	118.5	1.5	0	0	0	0.045	0.153	0.018	1.995	6	0	6	6	0.224	0	0.424	0.02	1	B	100	102	1
	Grains, rice, brown, medium-grain, cooked / Grains céréaliers, riz brun, grain moyen, cuit	grams	175	175	Day 2	Lunch - 1:00pm	196	4.06	41.1	3.342	0.612	1.452	0.289	0	17.5	0.927	77	138.2	1.75	0	0	0	0.052	0.178	0.021	2.328	7	0	7	7	0.261	0	0.495	0.023	1	B	100	102	1
	Grains, rice, brown, medium-grain, cooked / Grains céréaliers, riz brun, grain moyen, cuit	100 grams (100g)	2	200	Day 3	Dinner	224	4.64	47	3.82	0.7	1.66	0.33	0	20	1.06	88	158	2	0	0	0	0.06	0.204	0.024	2.66	8	0	8	8	0.298	0	0.566	0.026	1	B	100	102	1
	Grains, rice, brown, medium-grain, cooked / Grains céréaliers, riz brun, grain moyen, cuit	100 grams (100g)	2.5	250	Day 1	Lunch - 1:30pm	280	5.8	58.8	4.775	0.875	2.075	0.413	0	25	1.325	110	197.5	2.5	0	0	0	0.075	0.255	0.03	3.325	10	0	10	10	0.372	0	0.708	0.032	1	B	100	102	1
	Grains, rice, brown, medium-grain, cooked / Grains céréaliers, riz brun, grain moyen, cuit	1 ounce (28.35g)	2	56.7	Day 1	Dinner - 6:00pm	63.5	1.315	13.3	1.083	0.198	0.471	0.094	0	5.67	0.301	24.9	44.8	0.567	0	0	0	0.017	0.058	0.007	0.754	2.268	0	2.268	2.268	0.084	0	0.16	0.007	1	B	100	102	1
	Grains, rice, brown, medium-grain, cooked / Grains céréaliers, riz brun, grain moyen, cuit	1 ounce (28.35g)	4	113.4	Day 2	Dinner - 7:00pm	127	2.631	26.7	2.166	0.397	0.941	0.187	0	11.3	0.601	49.9	89.6	1.134	0	0	0	0.034	0.116	0.014	1.508	4.536	0	4.536	4.536	0.169	0	0.321	0.015	1	B	100	102	1
	Grains, rice, brown, medium-grain, cooked / Grains céréaliers, riz brun, grain moyen, cuit	grams	182	182	Day 3	Dinner	203.8	4.222	42.8	3.476	0.637	1.511	0.3	0	18.2	0.965	80.1	143.8	1.82	0	0	0	0.055	0.186	0.022	2.421	7.28	0	7.28	7.28	0.271	0	0.515	0.024	1	B	100	102	1
	Grains, rice, brown, medium-grain, cooked / Grains céréaliers, riz brun, grain moyen, cuit	grams	57	57	Day 2	Dinner	63.8	1.322	13.4	1.089	0.2	0.473	0.094	0	5.7	0.302	25.1	45	0.57	0	0	0	0.017	0.058	0.007	0.758	2.28	0	2.28	2.28	0.085	0	0.161	0.007	1	B	100	102	1
	Grains, buckwheat groats, roasted, cooked / Grains céréaliers, gruau de sarrasin, rôti, cuit	grams	343	343	Day 3	Breakfast - 10:30am	315.6	11.6	68.4	9.261	3.087	2.127	0.46	0	24	2.744	174.9	301.8	13.7	0	0	0	0.309	0.137	0.134	3.224	48	0	48	48	0.264	0	0.597	0.048	160	A	100	103	1
	Grains, buckwheat groats, roasted, cooked / Grains céréaliers, gruau de sarrasin, rôti, cuit	grams	311	311	Day 1	Breakfast - 10:00am	286.1	10.5	62	8.397	2.799	1.928	0.417	0	21.8	2.488	158.6	273.7	12.4	0	0	0	0.28	0.124	0.121	2.923	43.5	0	43.5	43.5	0.239	0	0.541	0.044	160	A	100	103	1
	Grains, buckwheat groats, roasted, cooked / Grains céréaliers, gruau de sarrasin, rôti, cuit	grams	57	57	Day 2	Breakfast - 9:00am	52.4	1.927	11.4	1.539	0.513	0.353	0.076	0	3.99	0.456	29.1	50.2	2.28	0	0	0	0.051	0.023	0.022	0.536	7.98	0	7.98	7.98	0.044	0	0.099	0.008	160	A	100	103	1
	Oatmeal, cooked, regular, NS as to fat added in cooking	1 cup, cooked (234g)	1.5	351	Day 1	Breakfast - 9:30am	214.1	7.476	38.4	5.616	0.562	3.686	0.632	0	38.6	2.281	80.7	196.6	424.7	0	0	0	0.246	0.211	0.081	0.576	14	0	14	14	0.053	0	1.25	0.056	5	A	100	108	1
	Cereals ready-to-eat, GENERAL MILLS Cinnamon CHEX	.75 cup (1 NLEA serving) (30g)	1.33	39.9	Day 3	Breakfast - 9:30am	160.8	1.995	32.9	0.958	10.4	2.629	0.239	0	132.9	10.8	10.8	50.3	241.4	298.9	7.98	1.317	0.602	0.515	0.555	6.663	266.1	264.5	1.596	451.3	0.662	1.995	0.339	0.14	6	A	100	108	2
	Cereal, ready to eat, Chex: honey nut, General Mills / Céréale, prête-à-manger, Chex: miel et noix, General Mills	grams	69	69	Day 3	Breakfast - 8:45am	271.2	3.22	59.8	0.92	21.9	1.38	0.413308	0	227.7	9.177	110.4	64.4	510.6	516.895	0	0	1.04105	1.38	0	3.312	54.5	41.4	13.1	83.5	0.414	0	0.586241	0.242105	6	A	100	108	2
	Cereal, ready to eat, Chex: honey nut, General Mills / Céréale, prête-à-manger, Chex: miel et noix, General Mills	grams	56	56	Day 3	Snack 2 - 4:12pm	220.1	2.614	48.5	0.746	17.7	1.12	0.335439	0	184.8	7.448	89.6	52.3	414.4	419.509	0	0	0.844912	1.12	0	2.688	44.2	33.6	10.6	67.8	0.336	0	0.475789	0.196491	6	A	100	108	2
	Cereal, ready to eat, Chex: honey nut, General Mills / Céréale, prête-à-manger, Chex: miel et noix, General Mills	grams	142	142	Day 1	Lunch - 11:30am	558.1	6.627	123.1	1.893	45	2.84	0.850576	0	468.6	18.9	227.2	132.5	1051	1063.75	0	0	2.14246	2.84	0	6.816	112.2	85.2	27	171.8	0.852	0	1.20647	0.498246	6	A	100	108	2
	Cereal, ready to eat, Chex: honey nut, General Mills / Céréale, prête-à-manger, Chex: miel et noix, General Mills	175ml (30g)	1	30	Day 2	Breakfast - 8:30am	117.9	1.4	26	0.4	9.5	0.6	0.179699	0	99	3.99	48	28	222	224.737	0	0	0.452632	0.6	0	1.44	23.7	18	5.7	36.3	0.18	0	0.254887	0.105263	6	A	100	108	2
	Cereal, ready to eat, Chex: honey nut, General Mills / Céréale, prête-à-manger, Chex: miel et noix, General Mills	grams	40	40	Day 1	Breakfast - 9:00am	157.2	1.867	34.7	0.533	12.7	0.8	0.239599	0	132	5.32	64	37.3	296	299.649	0	0	0.603509	0.8	0	1.92	31.6	24	7.6	48.4	0.24	0	0.33985	0.140351	6	A	100	108	2
	Cereal, ready to eat, Chex: honey nut, General Mills / Céréale, prête-à-manger, Chex: miel et noix, General Mills	grams	117	117	Day 3	Breakfast - 9:30am	459.8	5.46	101.4	1.56	37.1	2.34	3.4	0	386.1	15.6	187.2	109.2	865.8	874.282	0	0	1.76085	2.34	0	5.616	92.4	70.2	22.2	141.6	0.702	0	0.991575	0.4095	6	A	100	108	2
	Cereal, ready to eat, Cheerios: honey nut, General Mills / Céréale, prête-à-manger, Cheerios, miel et noix, General Mills	grams	48	48	Day 1	Breakfast - 9:30am	184.8	4.32	38.4	2.88	16	1.92	0.462	0	176	6.384	76.8	136	347.2	0	0	0	0.4608	0.96	0.077	2.304	37.9	28.8	9.12	58.1	0.288	0	1.018	0.059	6	A	100	108	2
	Cereal, ready to eat, Cheerios: honey nut, General Mills / Céréale, prête-à-manger, Cheerios, miel et noix, General Mills	grams	96	96	Day 3	Breakfast - 8:00am	369.6	8.64	76.8	5.76	32	3.84	0.923	0	352	12.8	153.6	272	694.4	0	0	0	0.9216	1.92	0.154	4.608	75.8	57.6	18.2	116.2	0.576	0	2.035	0.118	6	A	100	108	2
	Cereal, ready to eat, Cheerios: honey nut, General Mills / Céréale, prête-à-manger, Cheerios, miel et noix, General Mills	grams	100	100	Day 1	Breakfast - 11:00am	385	9	80	6	33.3	4	0.962	0	366.7	13.3	160	283.3	723.3	0	0	0	0.96	2	0.16	4.8	79	60	19	121	0.6	0	2.12	0.123	6	A	100	108	2
	Cereal, ready to eat, Cheerios: honey nut, General Mills / Céréale, prête-à-manger, Cheerios, miel et noix, General Mills	grams	100	100	Day 2	Breakfast	385	9	80	6	33.3	4	0.962	0	366.7	13.3	160	283.3	723.3	0	0	0	0.96	2	0.16	4.8	79	60	19	121	0.6	0	2.12	0.123	6	A	100	108	2
	Cereal, ready to eat, Cheerios: honey nut, General Mills / Céréale, prête-à-manger, Cheerios, miel et noix, General Mills	grams	100	100	Day 3	Lunch - 11:30am	385	9	80	6	33.3	4	0.962	0	366.7	13.3	160	283.3	723.3	0	0	0	0.96	2	0.16	4.8	79	60	19	121	0.6	0	2.12	0.123	6	A	100	108	2
	Cereal, ready to eat, Cheerios: honey nut, General Mills / Céréale, prête-à-manger, Cheerios, miel et noix, General Mills	grams	82	82	Day 1	Breakfast - 9:00am	315.7	7.38	65.6	4.92	27.3	3.28	0.788	0	300.7	10.9	131.2	232.3	593.1	0	0	0	0.7872	1.64	0.131	3.936	64.8	49.2	15.6	99.2	0.492	0	1.738	0.101	6	A	100	108	2
	Cereal, ready to eat, Cheerios: honey nut, General Mills / Céréale, prête-à-manger, Cheerios, miel et noix, General Mills	grams	82	82	Day 2	Breakfast - 8:30am	315.7	7.38	65.6	4.92	27.3	3.28	0.788	0	300.7	10.9	131.2	232.3	593.1	0	0	0	0.7872	1.64	0.131	3.936	64.8	49.2	15.6	99.2	0.492	0	1.738	0.101	6	A	100	108	2
	Cereal, ready to eat, Cheerios: honey nut, General Mills / Céréale, prête-à-manger, Cheerios, miel et noix, General Mills	1 ounce (28.35g)	3	85.05	Day 1	Breakfast - 7:30am	327.4	7.654	68	5.103	28.3	3.402	0.818	0	311.9	11.3	136.1	241	615.2	0	0	0	0.816	1.701	0.136	4.082	67.2	51	16.2	102.9	0.51	0	1.803	0.105	6	A	100	108	2
	Cereal, ready to eat, Cheerios: honey nut, General Mills / Céréale, prête-à-manger, Cheerios, miel et noix, General Mills	grams	69	69	Day 3	Breakfast - 9:00am	265.6	6.21	55.2	4.14	23	2.76	0.663	0	253	9.177	110.4	195.5	499.1	0	0	0	0.6624	1.38	0.11	3.312	54.5	41.4	13.1	83.5	0.414	0	1.463	0.085	6	A	100	108	2
	Cereal, ready to eat, Cheerios: honey nut, General Mills / Céréale, prête-à-manger, Cheerios, miel et noix, General Mills	grams	57	57	Day 2	Breakfast - 9:00am	219.4	5.13	45.6	3.42	19	2.28	0.548	0	209	7.581	91.2	161.5	412.3	0	0	0	0.547	1.14	0.091	2.736	45	34.2	10.8	69	0.342	0	1.208	0.07	6	A	100	108	2
	Cereal, ready to eat, Cheerios: honey nut, General Mills / Céréale, prête-à-manger, Cheerios, miel et noix, General Mills	1 ounce (28.35g)	1	28.35	Day 3	Breakfast	109.1	2.552	22.7	1.701	9.45	1.134	0.273	0	104	3.771	45.4	80.3	205.1	0	0	0	0.27264	0.567	0.045	1.361	22.4	17	5.387	34.3	0.17	0	0.601	0.035	6	A	100	108	2
	Cereal, Rice Krispies/Kellogg	1 cup (29g)	0.33	9.57	Day 2	Lunch - 12:30pm	36.5	0.646	8.139	0.038	0.945	0.196	0.044	0	0.478	2.911	2.584	12	50.4	108.7	6.058	0.593	2.549	0.169	0.123	1.719	58.4	58	0.383	99	0.225	0.692	0.056	0.002	6	A	100	108	2
	Cereal, Rice Krispies/Kellogg	1 cup (29g)	0.25	7.25	Day 1	Lunch - 2:45pm	27.6	0.489	6.166	0.029	0.716	0.149	0.033	0	0.362	2.205	1.958	9.062	38.2	82.4	4.589	0.449	1.931	0.128	0.094	1.303	44.2	43.9	0.29	75	0.17	0.524	0.043	0.001	6	A	100	108	2
	Cereal, Honey Nut Chex/General Mills	grams	69	69	Day 3	Breakfast - 8:45am	258.8	4.347	59.8	2.691	19.4	1.38	0.345	0	216	9.729	17.2	151.1	414	298.1	13	0.053475	0.145	0.828	0.89	10.8	216	202.9	13.1	357.4	1.076	3.236	0.671	0.019	6	A	100	108	2
	Cereal, Honey Nut Chex/General Mills	.75 cup (1 NLEA serving) (32g)	1	32	Day 1	Lunch - 11:30am	120	2.016	27.7	1.248	8.992	0.64	0.16	0	100.2	4.512	8	70.1	192	138.2	6.016	0.992	0.067	0.384	0.413	4.992	100.2	94.1	6.08	165.8	0.499	1.501	0.311	0.009	6	A	100	108	2
	Cereal, Honey Nut Chex/General Mills	grams	56	56	Day 3	Snack 2 - 4:12pm	210	3.528	48.5	2.184	15.7	1.12	0.28	0	175.3	7.896	14	122.6	336	241.9	10.5	0.0434	0.118	0.672	0.722	8.736	175.3	164.6	10.6	290.1	0.874	2.626	0.544	0.016	6	A	100	108	2
	GF One Degree Organic Foods - Veganic Sprouted Ancient Maize Flakes	grams	25	25	Day 1	Breakfast - 8:15am	91.7	3.333	15.8	4.167	5.833	2.5	0	0	16.7	2.25	23.94	78.19	125	0	1	0	0.0325	0.053	0	0.53	6.38	0	6.38	6.38	0.11	0	0	0	6	A	100	108	2
	All But Gluten - Whole Grain Bread	2 slices (92g)	1	92	Day 2	Lunch	250	7	40	6	3	8	1.5	0	80	2.7	74	150	380	0	0	0	4.4	0.3	0.255	4	160	132.4	27.6	160	0.2	0	0.549	0.035	3	B	100	104	2
	All But Gluten - Whole Grain Bread	2 slices (92g)	1	92	Day 2	Breakfast - 7:00am	250	7	40	6	3	8	1.5	0	80	2.7	74	150	380	0	0	0	4.4	0.3	0.255	4	160	132.4	27.6	160	0.2	0	0.549	0.035	3	B	100	104	2
	All But Gluten - Whole Grain Bread	2 slices (92g)	1	92	Day 3	Breakfast - 8:00am	250	7	40	6	3	8	1.5	0	80	2.7	74	150	380	0	0	0	4.4	0.3	0.255	4	160	132.4	27.6	160	0.2	0	0.549	0.035	3	B	100	104	2
	Multigrain bread - Kinnikinnick	1 serving (57g)	1	57	Day 1	Breakfast - 9:15am	150	4	22	5	1	6	1	0	44	1.4	45.67	122.55	180	0	0	0	0.3695	0.095	0.08	0.92	48	30.9	17.1	48	0.1524	0	0.9396	0.0602	3	B	100	104	2
	Multigrain bread - Kinnikinnick	1 serving (57g)	1	57	Day 2	Breakfast - 9:30am	150	4	22	5	1	6	1	0	44	1.4	45.67	122.55	180	0	0	0	0.3695	0.095	0.08	0.92	48	30.9	17.1	48	0.1524	0	0.9396	0.0602	3	B	100	104	2
	Multigrain bread - Kinnikinnick	1 serving (57g)	2	114	Day 1	Breakfast - 10:00am	300	6	44	10	2	12	2	0	88	2.8	90.94	245.1	360	0	0	0	0.739	0.19	0.16	1.84	96	61.8	34.2	96	0.3048	0	1.88	0.1204	3	B	100	104	2
	Glutino- Gluten Free Multigrain English Muffin	1 muffin (80g)	1	80	Day 1	Breakfast - 12:17pm	200	6	35	3	7	5	0	5	150	1.3	63.81	172	510	0	0	0	0.519	0.133	0.112	1.29	67.36	43.37	24	67.37	0.21	0	1.32	0.0844	4	C	100	107	2
	Glutino- Gluten Free Multigrain English Muffin	1 muffin (80g)	1	80	Day 3	Breakfast - 11:30am	200	6	35	3	7	5	0	5	150	1.3	63.81	172	510	0	0	0	0.519	0.133	0.112	1.29	67.36	43.37	24	67.37	0.21	0	1.32	0.0844	4	C	100	107	2
	Glutino- Gluten Free Multigrain English Muffin	1 muffin (80g)	1	80	Day 1	Lunch - 12:30pm	200	6	35	3	7	5	0	5	150	1.3	63.81	172	510	0	0	0	0.519	0.133	0.112	1.29	67.36	43.37	24	67.37	0.21	0	1.32	0.0844	4	C	100	107	2
	Glutino- Gluten Free Multigrain English Muffin	1 muffin (80g)	1	80	Day 2	Breakfast	200	6	35	3	7	5	0	5	150	1.3	63.81	172	510	0	0	0	0.519	0.133	0.112	1.29	67.36	43.37	24	67.37	0.21	0	1.32	0.0844	4	C	100	107	2
	Glutino- Gluten Free Multigrain English Muffin	1 muffin (80g)	1	80	Day 2	Dinner - 7:30PM	200	6	35	3	7	5	0	5	150	1.3	63.81	172	510	0	0	0	0.519	0.133	0.112	1.29	67.36	43.37	24	67.37	0.21	0	1.32	0.0844	4	C	100	107	2
	Glutino- Gluten Free Multigrain English Muffin	grams	86	86	Day 1	Snack 1 - 2:24pm	215	6.45	37.6	3.225	7.525	5.375	0	5.375	161.2	1.3	63.81	172	548.2	0	0	0	0.519	0.133	0.112	1.29	67.36	43.37	24	67.37	0.21	0	1.32	0.0844	4	C	100	107	2
	Glutino- Gluten Free Multigrain English Muffin	1 muffin (80g)	2	160	Day 1	Lunch - 1:00pm	400	12	70	6	14	10	0	10	300	2.6	127.62	344	1020	0	0	0	1.038	0.266	0.224	2.58	134.72	86.74	48	134.74	0.42	0	2.64	0.1688	4	C	100	107	2
	Glutino- Gluten Free Multigrain English Muffin	1 muffin (80g)	2	160	Day 3	Breakfast	400	12	70	6	14	10	0	10	300	2.6	127.62	344	1020	0	0	0	1.038	0.266	0.224	2.58	134.72	86.74	48	134.74	0.42	0	2.64	0.1688	4	C	100	107	2
	Glutino- Gluten Free Multigrain English Muffin	grams	80	86	Day 1	Lunch - 2:24pm	200	6	35	3	7	5	0	5	150	1.3	63.81	172	510	0	0	0	0.519	0.133	0.112	1.29	67.36	43.37	24	67.37	0.21	0	1.32	0.0844	4	C	100	107	2
	Multigrain bread - Kinnikinnick	1 serving (57g)	0.5	28.5	Day 1	Breakfast - 9:15am	37.5	1	5	1.5	0.5	1.5	2.03571	0	10	0.7	92.9711	249.477	45	0	0	0	0.752196	0.193393	0.162857	1.87286	97.7143	62.9036	34.8107	97.7143	0.310243	0	1.91276	0.12255	3	B	100	104	2
	Multigrain bread - Kinnikinnick	1 serving (57g)	0.5	28.5	Day 2	Breakfast - 9:30am	37.5	1	5	1.5	0.5	1.5	2.03571	0	10	0.7	92.9711	249.477	45	0	0	0	0.752196	0.193393	0.162857	1.87286	97.7143	62.9036	34.8107	97.7143	0.310243	0	1.91276	0.12255	3	B	100	104	2
	Multigrain bread - Kinnikinnick	1 serving (57g)	0.5	28.5	Day 1	Breakfast - 10:30am	37.5	1	5	1.5	0.5	1.5	0.5	0	10	0.7	22.835	61.275	45	0	0	0	0.18475	0.0475	0.04	0.46	24	15.45	8.55	24	0.0762	0	0.4698	0.0301	3	B	100	104	2
	Multigrain bread - Kinnikinnick	grams	38	38	Day 1	Lunch - 12:30pm	50	1.333	6.667	2	0.667	2	1.5	0	13.3	0.9	68.505	183.825	60	0	0	0	0.55425	0.1425	0.12	1.38	72	46.35	25.65	72	0.2286	0	1.4094	0.0903	3	B	100	104	2
	Multigrain bread - Kinnikinnick	1 serving (57g)	1	57	Day 1	Breakfast - 6:00am	75	2	10	3	1	3	1	0	20	1.4	45.67	122.55	90	0	0	0	0.3695	0.095	0.08	0.92	48	30.9	17.1	48	0.1524	0	0.9396	0.0602	3	B	100	104	2
	Multigrain bread - Kinnikinnick	1 serving (57g)	1	57	Day 1	Breakfast - 6:15am	75	2	10	3	1	3	1	0	20	1.4	45.67	122.55	90	0	0	0	0.3695	0.095	0.08	0.92	48	30.9	17.1	48	0.1524	0	0.9396	0.0602	3	B	100	104	2
	Presidents Choice - Gluten Free Rustic White Bread	1 slice (56g)	1	56	Day 1	Breakfast - 9:00am	70	1	16	4	1	1	1	0	30	1.3	44.6723	120.4	150	0	0	0	0.363018	0.0933333	0.0785965	0.90386	47.1579	30.3579	16.8	47.1579	0.149726	0	0.923116	0.0591439	2	A	100	104	2
	Cereal, hot, cream of rice, cooked / Céréale, chaude, crème de riz, cuite	grams	211	211	Day 1	Breakfast - 7:30am	109.7	1.899	24.1	0.211	0	0.211	0	0	6.33	0.422	6.33	42.2	2.11	0	0	0	0.042	0	0	0.844	6.33	0	6.33	6.33	0.057	0	0	0	5	A	100	108	2
	Dempster's - Gluten Zero Bread	grams	1	30	Day 3	Lunch - 1:30pm	219.2	3.462	39.2	3.462	4.616	5.768	1.154	11.538	23	1.246	1.8	1.8	484.6	0	0	0	0.132	0	0	0	0	0	0	0	0	0.024	0.688759	0.0918621	2	A	100	104	3
	Kinnikinnick Foods - Gluten Free Bread Crumbs - Panko Style	grams	45	45	Day 1	Lunch - 2:08pm	277.5	9	40.5	6	3	7.5	1.5	0	165	1.62	0.35	34.5	447	0	0.9	0	0.099	0	0	0	0	0	0	0	0	0.018	0.517	0.069	4	A	100	105	3
	Kinnikinnick Foods - Gluten Free Bread Crumbs - Panko Style	1 oz (30g)	2	60	Day 2	Dinner - 6:49pm	370	12	54	8	4	10	2	0	220	2.16	1.8	46	596	0	1.2	0	0.132	0	0	0	0	0	0	0	0	0.024	0.689	0.092	4	A	100	105	3
	Gluten Free Crackers - Breton	grams	28	28	Day 3	Snack 2 - 4:12pm	143.29	1.5575	18.69	1.5575	1.5575	7.0132	3.115	0	0	1.1214	28.035	238.298	124.6	0	0	0	0	0.0979	0.07031	1.3172	0	0	0	0	0	0	0	0	4	B	100	106	3
	Gluten Free Crackers - Breton	grams	27	27	Day 3	Lunch - 12:15pm	138	1.52419	18	1.52419	1.52419	6	6	7.2	0	1.08	27.4355	233.202	120	0	0	0	0	0.0958065	0.0688065	1.28903	0	0	0	0	0	0	0	0	4	B	100	106	3
	Gluten Free Crackers - Breton	1 cracker (4.5g)	7	31.5	Day 2	Lunch - 2:00pm	161	1.75	21	1.75	1.75	7.88	3.5	0	0	1.26	31.5	267.75	140	0	0	0	0	0.11	0.079	1.48	0	0	0	0	0	0	0	0	4	B	100	106	3
	Gluten Free Crackers - Breton	1 cracker (4.5g)	7	31.5	Day 2	Lunch - 2:00pm	161	1.75	21	1.75	1.75	7.88	3.5	0	0	1.26	31.5	267.75	140	0	0	0	0	0.11	0.079	1.48	0	0	0	0	0	0	0	0	4	B	100	106	3
	Gluten Free Crackers - Breton	grams	28	28	Day 3	Snack 2 - 3:02pm	143.1	1.58065	18.7	1.58065	1.58065	6.222	6.222	7.467	0	1.12	28.4516	241.839	124.4	0	0	0	0	0.0993548	0.0713548	1.33677	0	0	0	0	0	0	0	0	4	B	100	106	3
	Cracker, snack - sesame seed crackers	grams	33.2	33.2	Day 1	Breakfast - 10:08am	166.7	2.457	20.3	0.531	0.594	8.4	1.254	0	39.8	1.195	8.964	44.2	281.2	0	0	0	0.674	0.135	0.114	1.344	29.9	25.2	4.648	47.5	0.018	0	2.943	0.217	4	B	100	106	3
	Cracker, snack - sesame seed crackers	grams	16	16	Day 2	Snack 1 - 12:00pm	80.3	1.184	9.76	0.256	0.286	4.048	0.604	0	19.2	0.576	4.32	21.3	135.5	0	0	0	0.325	0.065	0.055	0.648	14.4	12.2	2.24	22.9	0.008	0	1.418	0.105	4	B	100	106	3
	Cracker, snack - sesame seed crackers	grams	16.6	16.6	Day 1	Snack 1 - 1:30pm	83.3	1.228	10.1	0.266	0.297	4.2	0.627	0	19.9	0.598	4.482	22.1	140.6	0	0	0	0.337	0.068	0.057	0.672	14.9	12.6	2.324	23.7	0.009	0	1.472	0.109	4	B	100	106	3
	Gluten Free Crackers - Breton	1 cracker (4.5g)	5	22.5	Day 2	Lunch - 12:00pm	112.7	1.225	14.7	1.225	1.225	5.516	2.45	0	0	0.882	22.05	187.425	98	0	0	0	0	0.077	0.0553	1.036	0	0	0	0	0	0	0	0	4	B	100	106	3
	Raw Garcia - 3 Seed Sweet Potato Crackers	grams	35	35	Day 1	Lunch - 12:30pm	175	2.5	22.5	2.5	2.5	8.75	1.25	0	25	0.45	51.1	75.25	62.5	0	0	0	1.5015	0.005	0.035	0.4415	7	0	7	7	0.0745	0.126	1.6235	0.045	4	B	100	106	3
	Raw Garcia - 3 Seed Sweet Potato Crackers	grams	40	40	Day 2	Lunch - 12:00pm	200	2.857	25.7	2.857	2.857	10	1.428	0	28.6	0.514	58.4	86	71.4	0	0	0	1.716	0.00571429	0.04	0.504571	8	0	8	8	0.0851429	0.144	1.85543	0.0514286	4	B	100	106	3
	Raw Garcia - 3 Seed Sweet Potato Crackers	grams	43	43	Day 3	Lunch - 1:30pm	215	3.071	27.6	3.071	3.071	10.8	1.536	0	30.7	0.553	62.78	92.45	76.8	0	0	0	1.8447	0.00614286	0.043	0.542414	8.6	0	8.6	8.6	0.0915286	0.1548	1.99459	0.0552857	4	B	100	106	3
	Cereal, ready to eat, granola, homemade / Céreale, prête-à-manger, granola, maison	grams	100	100	Day 1	Breakfast - 7:30am	490	14.9	53	8.6	20.1	24.4	4.537	0	78	4.25	175	537	22	0.583	1.2	0	5.88	0.736	0.292	2.115	83	0	83	83	0.311	0	10.2	0.488	6	A	100	108	3
	Cereal, ready to eat, granola, homemade / Céreale, prête-à-manger, granola, maison	grams	100	100	Day 3	Breakfast - 7:30am	490	14.9	53	8.6	20.1	24.4	4.537	0	78	4.25	175	537	22	0.583	1.2	0	5.88	0.736	0.292	2.115	83	0	83	83	0.311	0	10.2	0.488	6	A	100	108	3
	Cereal, ready to eat, granola, homemade / Céreale, prête-à-manger, granola, maison	100ml (51.56g)	0.5	25.78	Day 3	Breakfast - 7:00am	126.3	3.834	13.7	2.217	5.182	6.28	1.17	0	20.1	1.096	45.1	138.4	5.672	0.15	0.309	0	1.516	0.19	0.075	0.545	21.4	0	21.4	21.4	0.08	0	2.635	0.126	6	A	100	108	3
	Cereal, ready to eat, granola, homemade / Céreale, prête-à-manger, granola, maison	100ml (51.56g)	0.5	25.78	Day 3	Breakfast - 7:00am	126.3	3.834	13.7	2.217	5.182	6.28	1.17	0	20.1	1.096	45.1	138.4	5.672	0.15	0.309	0	1.516	0.19	0.075	0.545	21.4	0	21.4	21.4	0.08	0	2.635	0.126	6	A	100	108	3
	Gluten Free Granola Loaded Fruit and Nut - Trader Joes	grams	39	39	Day 1	Breakfast - 5:00am	184.7	2.737	23.3	2.053	7.526	8.895	1.369	0	27.4	0.739	44.64	138.24	30.8	0	0	0	3	0.057	0.039	2.05	2.34	0	2.34	2.34	0.053	0	3.57	0.314	6	A	100	108	3
	Taco shell, baked / Coquille à taco, cuite	ounces	1.5	42.53	Day 2	Dinner - 6:30pm	198.6	3.011	26.7	1.956	0.523	8.858	2.656	0	43	0.791	36.1	94.8	165.4	0.425	0	0	0.293	0.092	0.034	0.794	29.8	0	29.8	29.8	0.086	0	3.041	0.047	4	A	100	105	3
	Taco shell, corn	1 miniature (3" dia) (5g)	3	15	Day 1	Dinner - 7:00pm	70	1.062	9.408	0.69	0.185	3.124	0.656	0	15.2	0.279	12.8	33.4	58.4	0.15	0	0	0.104	0.032	0.012	0.28	10.4	3.6	6.9	12.8	0.03	0	0.531	0.027	4	A	100	105	3
	Yippie Hippie - Granola	grams	10	10	Day 1	Breakfast - 6:15am	46.6	1.2	5.8	1	1.6	2.2	0.4	0	7.7907	0.424806	17.4806	53.6434	8.8	0.0581395	0.119767	0	0.587597	0.0736434	0.0290698	0.21124	8.29457	0	8.29457	8.29457	0.0310078	0	1.02132	0.0488372	6	A	100	108	3
	Cracker, multigrain, salt free	grams	23	23	Day 2	Lunch	104.4	1.934	14.6	0.713	2.859	4.312	0.77	0	21.2	0.77	8.74	38.4	16.8	3.45	0.115	0	0.347	0.095	0.074	0.857	17.9	13.8	4.14	27.6	0.021	0.018	1.517	0.073	4	B	100	106	3
	Crunchmaster - Rice Crackers Sesame	15 crackers (29g)	1	29	Day 2	Lunch - 12:30pm	130	2	25	1	0	2	0	0	20	0.36	37.99	31	85	0	0	0	1.897	0	0.048	2.26	6.09	0	6.09	6.09	0	0	0	0	4	B	100	106	3
	Crunchmaster - Rice Crackers Sesame	grams	16	16	Day 3	Lunch - 2:30pm	71.7	1.104	13.8	0.552	0	1.104	0	0	11	0.199	18.995	15.5	46.9	0	0	0	0.948	0	0.024	1.13	3.045	0	3.045	3.045	0	0	0	0	4	B	100	106	3
	Gluten Free Vegetable Crackers - Glutino	ounces	0.75	21.26	Day 1	Dinner - 8:30pm	92.12	0.71	17	0.71	0.71	5.67	1.42	5.67	15.59	0	27.85	61.65	175.8	0	0	0	0	0.012	0	1.66	4.46	0	4.46	4.46	0.0319	0	0.206	0.0021	4	B	100	106	3
	Gluten Free Vegetable Crackers - Glutino	1 cracker (3.75g)	7	26.25	Day 2	Lunch - 2:00pm	113	0.87	21	0.87	0.87	7	1.75	7	19.25	0	34.38	76.12	217	0	0	0	0	0.016	0	2.05	5.51	0	5.51	5.51	0.039	0	0.255	0.0026	4	B	100	106	3
	Gluten Free Vegetable Crackers - Glutino	1 cracker (3.75g)	7	26.25	Day 2	Lunch - 2:00pm	113	0.87	21	0.87	0.87	7	1.75	7	19.25	0	34.38	76.12	217	0	0	0	0	0.016	0	2.05	5.51	0	5.51	5.51	0.039	0	0.255	0.0026	4	B	100	106	3
	Christie - Rice Cracker -Sesame	12 crackers (19g)	1	19	Day 1	Lunch - 12:30pm	80	1	16	0.666667	0	1.33333	0	0	13.3333	0.36	25.3267	20.6667	85	0	0	0	1.26467	0	0.032	1.50667	4.06	0	4.06	4.06	0	0	0	0	4	B	100	106	3
	Nature's Path - Corn Puffs Gorilla Munch	grams	82	82	Day 3	Breakfast - 6:08am	328	5.467	71.1	5.467	21.9	2.733	0.55	0	0	0.984	4.1	17.22	218.7	0	0	0	0	0	0	0	0.82	0	0.82	0.82	0	0	0	0	6	A	100	108	1
	Nature's Path - Honey'd Corn Flakes (Gluten Free)	grams	107	107	Day 1	Dinner - 7:30pm	428	7.134	96.3	3.566	14.3	0	0	0	0	1.284	31.03	130.54	374.5	71.2	0	0	0	0.247	0	1.57	0	0	0	0	0	0	0	0	6	A	100	108	1
	Cereal, ready to eat, Corn Flakes, Honey'd, Nature's Path / Céréale, prête-à-manger, Flocons de mäis: Honey'd (miel), Nature's Path	grams	91	91	Day 2	Breakfast - 5:34am	361.3	7.262	78.5	6.334	12.1	1.41	0.191	0	5.369	0.974	26.39	140.1	427	0	0.009	0	0	0.210065	0	1.33523	0	0	0	0	0	0	0	0	6	A	100	108	1
	Cereal, ready to eat, Corn Flakes, Honey'd, Nature's Path / Céréale, prête-à-manger, Flocons de mäis: Honey'd (miel), Nature's Path	grams	45	45	Day 2	Breakfast - 8:15am	178.6	3.591	38.8	3.132	5.962	0.697	0.094	0	2.655	0.482	13.05	69.3	211.2	0	0.004	0	0	0.103879	0	0.66028	0	0	0	0	0	0	0	0	6	A	100	108	1
	Bread crumbs, dry, grated, plain / Pain, chapelure, séchée, émiettée, nature	100ml (45.65g)	0.091	4.15	Day 3	Lunch	16.4	0.555	2.99	0.187	0.258	0.22	0.05	0	7.602	0.201	1.786	8.142	30.4	0	0	0	0.003	0.04	0.017	0.276	4.445	3.406	1.038	6.829	0.005	0.015	0.078	0.008	140	C	100	105	3
	Snacks, rice cakes, crackers (include mini rice cakes) / Grignotises, galettes de riz, craquelins (mini crousties inclues)	grams	14	14	Day 1	Lunch - 11:30am	54.9	0.994	11.4	0.588	0.123	0.602	0.122	0	1.54	0.209	18.3	59.9	9.94	0	0	0	0.174	0.008	0.022	1.093	2.94	0	2.94	2.94	0.021	0	0.209	0.002	4	B	100	106	3
	Snacks, rice cakes, crackers (include mini rice cakes) / Grignotises, galettes de riz, craquelins (mini crousties inclues)	grams	15	15	Day 1	Lunch - 2:45pm	58.8	1.065	12.2	0.63	0.132	0.645	0.131	0	1.65	0.224	19.7	64.2	10.7	0	0	0	0.186	0.009	0.024	1.172	3.15	0	3.15	3.15	0.022	0	0.224	0.002	4	B	100	106	3
	Snacks, rice cakes, crackers (include mini rice cakes) / Grignotises, galettes de riz, craquelins (mini crousties inclues)	grams	15	15	Day 2	Lunch - 12:30pm	58.8	1.065	12.2	0.63	0.132	0.645	0.131	0	1.65	0.224	19.7	64.2	10.7	0	0	0	0.186	0.009	0.024	1.172	3.15	0	3.15	3.15	0.022	0	0.224	0.002	4	B	100	106	3
	Snacks, rice cakes, crackers (include mini rice cakes) / Grignotises, galettes de riz, craquelins (mini crousties inclues)	1 mini (3g)	5	15	Day 2	Lunch - 1:30pm	58.8	1.065	12.2	0.63	0.132	0.645	0.131	0	1.65	0.224	19.7	64.2	10.7	0	0	0	0.186	0.009	0.024	1.172	3.15	0	3.15	3.15	0.022	0	0.224	0.002	4	B	100	106	3
	Rice cake, cracker-type - Pacific Rice Mini Crispys	ounces	1.85	52.45	Day 3	Snack 1 - 11:16am	205.6	3.724	42.5	2.203	0.462	2.255	0.459	0	5.769	0.781	68.7	224.5	37.2	0	0	0	0.65	0.031	0.084	4.096	11	0	11	11	0.079	0	0.781	0.008	4	B	100	106	3
	Snacks, rice cakes, crackers (include mini rice cakes) / Grignotises, galettes de riz, craquelins (mini crousties inclues)	ounces	4	113.4	Day 1	Snack 2 - 8:00pm	444.5	8.051	92	4.763	0.998	4.876	0.992	0	12.5	1.69	148.6	485.4	80.5	0	0	0	1.406	0.068	0.181	8.857	23.8	0	23.8	23.8	0.17	0	1.69	0.017	4	B	100	106	3
	Snacks, rice cakes, crackers (include mini rice cakes) / Grignotises, galettes de riz, craquelins (mini crousties inclues)	1 mini (3g)	2	6	Day 2	Lunch - 12:15pm	23.5	0.426	4.866	0.252	0.053	0.258	0.052	0	0.66	0.089	7.86	25.7	4.26	0	0	0	0.074	0.004	0.01	0.469	1.26	0	1.26	1.26	0.009	0	0.089	0.001	4	B	100	106	3
	Snacks, rice cakes, crackers (include mini rice cakes) / Grignotises, galettes de riz, craquelins (mini crousties inclues)	1 mini (3g)	4	12	Day 3	Lunch - 1:00pm	47	0.852	9.732	0.504	0.106	0.516	0.105	0	1.32	0.179	15.7	51.4	8.52	0	0	0	0.149	0.007	0.019	0.937	2.52	0	2.52	2.52	0.018	0	0.179	0.002	4	B	100	106	3
	Crackers, rice	grams	50	50	Day 2	Dinner - 6:00pm	192	3.315	37.2	0.6	0.055	2.805	0.418	0	13.5	0.375	11.5	53.5	390	0	0	0	0.34	0.032	0.023	0.744	3.5	0	3.5	3.5	0.076	0	1.144	0.16	4	B	100	106	3
	Crackers, rice	grams	23	23	Day 1	Snack 1 - 4:00pm	88.3	1.525	17.1	0.276	0.025	1.29	0.192	0	6.21	0.172	5.29	24.6	179.4	0	0	0	0.156	0.015	0.011	0.342	1.61	0	1.61	1.61	0.035	0	0.526	0.074	4	B	100	106	3
	Pancake, plain (includes buttermilk), dry mix, complete, unprepared / Crêpe, nature (inclut au babeurre), mélange sec complet, non préparé	1 ounce (28.35g)	1.5	42.53	Day 1	Breakfast - 8:00am	159.9	4.295	30.3	1.148	2.25832	2.084	0.418	8.93	102.5	1.28	15.7	145	516.7	8.505	0.17	0	0.446412	0.217	0.199	1.569	43	32.3	10.6	65.6	0.084	0.162	0.631	0.04	170	D	100	107	3
	Gluten Free Pancake mix - Kinnikinnick	ounces	8.9	252.31	Day 1	Dinner - 6:20pm	944	11.8	200.6	5.86	41.3	5.86	1.77	0	129.8	3.78	20.32	66.04	2891	0	0	0	0	0.051	0	1.016	0	0	0	0	0	0	0	0	4	F	100	107	3
	Grains, rice flour, white / Grains céréaliers, riz blanc, farine	grams	20.868	20.87	Day 2	Dinner - 7:30PM	76.4	1.242	16.7	0.501	0.025	0.296	0.081	0	2.087	0.073	7.304	15.9	0	0	0	0	0.023	0.029	0.004	0.54	0.835	0	0.835	0.835	0.091	0	0.065	0.014	1	C	100	103	3
	Dempster's - Gluten Zero Bread	grams	30	30	Day 2	Breakfast - 7:41am	109.6	1.731	19.6	1.731	2.308	2.884	0.577	5.769	11.5	0.623	0.9	0.9	242.3	0	0	0	0.066	0	0	0	0	0	0	0	0	0.012	0.344379	0.045931	2	A	100	104	3
	Dempster's - Gluten Zero Bread	grams	30	30	Day 2	Breakfast - 7:41am	109.6	1.731	19.6	1.731	2.308	2.884	0.577	5.769	11.5	0.623	0.9	0.9	242.3	0	0	0	0.066	0	0	0	0	0	0	0	0	0.012	0.344379	0.045931	2	A	100	104	3
	Dempster's - Gluten Zero Bread	grams	49	49	Day 3	Dinner - 11:35pm	179	2.827	32	2.827	3.769	4.711	0.942	9.423	18.8	1.018	1.47	1.47	395.8	0	0	0	0.1078	0	0	0	0	0	0	0	0	0.0196	0.562486	0.0750207	2	A	100	104	3
	Dempster's - Gluten Zero Bread	grams	34	34	Day 3	Dinner - 7:10pm	124.2	1.961	22.2	1.961	2.615	3.269	0.654	6.539	13.1	0.706	1.02	1.02	274.6	0	0	0	0.0748	0	0	0	0	0	0	0	0	0.0136	0.390297	0.0520552	2	A	100	104	3
	Grains, rice, white, long-grain, regular, dry / Grains céréaliers, riz blanc, grain long, ordinaire, sec	100 grams (100g)	1.5	150	Day 2	Dinner - 6:00pm	547.5	10.7	119.9	1.455	0.18	0.99	0.27	0	42	1.2	37.5	172.5	7.5	0	0	0	0.165	0.105	0.074	2.4	12	0	12	12	0.246	0	0.219	0.046	1	B	100	102	3
	Grains, rice, white, long-grain, regular, dry / Grains céréaliers, riz blanc, grain long, ordinaire, sec	1 ounce (28.35g)	3	85.05	Day 1	Dinner - 5:30pm	310.4	6.064	68	0.825	0.102	0.561	0.153	0	23.8	0.68	21.3	97.8	4.252	0	0	0	0.094	0.06	0.042	1.361	6.804	0	6.804	6.804	0.139	0	0.124	0.026	1	B	100	102	3
	Catelli - Gluten Free Penne	grams	235	235	Day 1	Lunch - 12:30pm	857.1	16.6	182.5	8.293	0	5.53	2.764	0	241.68	2.987	121.727	2779.2	0	0	0	0	0	0.178938	0.073036	1.88676	20.3283	0	20.3283	20.3283	0.194763	0	1.07119	0.0340835	1	A	100	101	3
	Grains, corn flour, yellow, whole-grain / Grains céréaliers, farine de maïs, jaune, grain entier	1 ounce (28.35g)	0.104	2.95	Day 3	Dinner - 8:00pm	10.7	0.205	2.269	0.216	0.019	0.114	0.016	0	0.207	0.07	2.746	9.302	0.148	0.325	0	0	0.012	0.007	0.002	0.056	0.738	0	0.738	0.738	0.011	0	0.05	0.002	1	C	100	103	3
	Grains, corn flour, yellow, whole-grain / Grains céréaliers, farine de maïs, jaune, grain entier	1 ounce (28.35g)	0.057	1.61	Day 3	Lunch	5.813	0.112	1.238	0.118	0.01	0.062	0.009	0	0.113	0.038	1.498	5.072	0.081	0.177	0	0	0.007	0.004	0.001	0.031	0.403	0	0.403	0.403	0.006	0	0.027	0.001	1	C	100	103	3
	Barilla- GF Fettucine	grams	113	113	Day 1	Dinner - 6:43pm	403.6	8.072	88.8	1.99313	12.1014	4.035	4.04716	0	80.7028	0	40.6475	928.043	686.014	3.39	4.84858	0	0	0.0597518	0.0243885	0.630036	6.78813	0	6.78813	6.78813	0.065036	0	0.357698	0.0113813	1	A	100	101	3
	Barilla- GF Fettucine	grams	113	113	Day 2	Lunch - 11:39am	403.6	8.072	88.8	1.99313	12.1014	4.035	4.04716	0	80.7028	0	40.6475	928.043	686.014	3.39	4.84858	0	0	0.0597518	0.0243885	0.630036	6.78813	0	6.78813	6.78813	0.065036	0	0.357698	0.0113813	1	A	100	101	3
	Barilla - Gluten free Penne Pasta	grams	278	278	Day 3	Dinner - 6:45pm	992.9	19.9	218.4	4.965	0	4.965	0	0	0	0	100	377.3	0	8.34	0	0	0	0.147	0.06	1.55	16.7	0	16.7	16.7	0.16	0	0.88	0.028	1	A	100	101	3
	Barilla - Penne Gluten Free	grams	218	218	Day 2	Lunch - 11:53am	769	15.4	169.2	3.846	23.4	3.846	7.785	0	155.7	0	78.4173	1791	1324	6.54	9.343	0	0	0.115273	0.0470504	1.21547	13.0957	0	13.0957	13.0957	0.125468	0	0.690072	0.0219568	1	A	100	101	3
	Barilla - Penne Gluten Free	grams	282	282	Day 1	Dinner - 6:52pm	994.7	19.9	218.8	4.974	30.2	4.974	10.1	0	201.4	0	101.439	2316	1712	8.46	12.1	0	0	0.149115	0.0608633	1.5723	16.9403	0	16.9403	16.9403	0.162302	0	0.892662	0.0284029	1	A	100	101	3
	Vita Sana - Polenta	grams	46	46	Day 2	Dinner - 6:26pm	153.3	3.067	36.8	1.533	0	0	0	0	0	0	0	0	0	0	0	0	0	0.00782	0.00276	0.0805	0.46	0	0.46	0.46	0.00966	0	0	0	160	A	100	103	3
	Vita Sana - Polenta	grams	46	46	Day 3	Lunch - 11:44am	153.3	3.067	36.8	1.533	0	0	0	0	0	0	0	0	0	0	0	0	0	0.00782	0.00276	0.0805	0.46	0	0.46	0.46	0.00966	0	0	0	160	A	100	103	3
	Gluten Free Bread	grams	70	70	Day 2	Lunch	220	3	29	0	2	8	0	0	0	0	2.1	2.1	410	0	0	0	0.154	0	0	0	0	0	0	0	0	0.028	0.803	0.107	2	A	100	104	3
	Gluten Free Pizza Crust - Udi	1 serving (115g)	1	115	Day 1	Dinner	360	8.001	62	2	10	10	0	0	40	0.72	50.6	90.85	680	0	0	0	0	0.117	0.014	1.53	4.6	0	4.6	4.6	0	0	0	0	4	F	100	107	3
	Roll, dinner, plain (also brown and serve), commercial / Pain mollet, petit, nature (aussi semi cuit), commercial	55g (55g)	1	55	Day 3	Dinner - 7:10pm	170.5	5.973	28.6	1.1	3.053	3.558	0.756	2.2	97.9	2.046	14.3	76.5	294.8	0.55	0.11	0	0.154	0.289	0.206	2.952	55.6	39	16.5	82.9	0.053	0.071	1.257	0.123	4	A	100	105	3
	Schar - GF Brioche bun	1 bun (50g)	1	50	Day 2	Lunch - 12:00pm	147	2	26	2	7	4	0.675	13	37	1.41	16	34.5	233.5	26	0	0	0.4	0.1365	0.163	1.0185	17	0	17	17	0	0	1.51	0.091	4	A	100	105	3
	Udi's - Gluten-free Soft & Chewy Cinnamon Raisin Bagels	ounces	2.71	76.83	Day 1	Breakfast - 8:30am	223.7	4.862	37	1.945	2.917	6.808	0	0	19.4	0.7	2.28	2.28	369.6	0	0	0	0.1672	0	0	0	0	0	0	0	0	0.0304	0.872428	0.116359	4	A	100	105	3
	Udi's - Gluten-free Soft & Chewy Cinnamon Raisin Bagels	ounces	3	85.05	Day 1	Lunch - 12:05pm	247.6	5.383	40.9	2.153	3.229	7.536	0	0	21.5	0.775	2.55	2.55	409.1	0	0	0	0.187	0	0	0	0	0	0	0	0	0.034	0.975741	0.130138	4	A	100	105	3
	Udi's - Gluten-free Soft & Chewy Cinnamon Raisin Bagels	ounces	2.76	78.25	Day 2	Dinner - 6:00pm	227.8	4.952	37.6	1.981	2.971	6.933	0	0	19.8	0.713	2.34	2.34	376.4	0	0	0	0.1716	0	0	0	0	0	0	0	0	0.0312	0.895386	0.119421	4	A	100	105	3
	Schar's - Multigrain Bread (Gluten Free)	2 slices (62g)	1	62	Day 3	Breakfast - 9:00am	180	3	38	5	4	2	0	0	20	1.08	49.6	0	210	0	0	0	0.403	0.40486	0.186	4.22233	18.6	0	18.6	18.6	0.165755	0	1.02553	0.0656694	3	B	100	104	3
	Schar's - Multigrain Bread (Gluten Free)	2 slices (62g)	1	62	Day 3	Dinner - 6:30pm	180	3	38	5	4	2	0	0	20	1.08	49.6	0	210	0	0	0	0.403	0.40486	0.186	4.22233	18.6	0	18.6	18.6	0.165755	0	1.02553	0.0656694	3	B	100	104	3
	La Tortilla Factory - Ivory Teff Wrap: Wheat and Gluten Free	1 tortilla (66g)	1	66	Day 1	Lunch - 12:00pm	190	2	33	3	1	6	2	0	100	1.8	52.8	115	340	0	0	0	0.429	0.43098	0.198	4.49473	19.8	0	19.8	19.8	0.176449	0	1.09169	0.0699061	4	A	100	105	3
	Western family - gluten free whole grain bread	grams	31	31	Day 3	Breakfast - 11:00am	89	1.26	15	0.633	1.265	3.2	0	0	31.6	0.253	24.8	0	164	0	0	0	0.202	0.2024	0.093	2.11	9.3	0	9.3	9.3	0.0829	0	0.51	0.0328	3	B	100	104	3
	Co-op Pure - Gluten Free Whole Grain Bun	1 bun (82g)	1	82	Day 2	Lunch - 12:30pm	234.29	3.347	38.5	1.67	3.3	8.36	0	0	83.67	0.6694	65.6	0	435.1	0	0	0	0.553	0.536	0.246	5.58	24.6	0	24.6	24.6	0.2192	0	1.356	0.0869	3	B	100	104	3
	Udi's - GF Wholegrain bread	grams	28	28	Day 2	Breakfast - 6:30am	80	2.286	12.6	1.143	1.714	2.286	0	0	11.4	0.206	23.2	62.35	140	0	0	0	0.189	0.19	0.087	2.01	8.85	0	8.85	8.85	0.0775	0	0.488	0.0313	3	B	100	104	3
	Udi's - GF Wholegrain bread	grams	28	28	Day 3	Breakfast - 6:30am	80	2.286	12.6	1.143	1.714	2.286	0	0	11.4	0.206	23.2	62.35	40	0	0	0	0.189	0.19	0.087	2.01	8.85	0	8.85	8.85	0.0775	0	0.488	0.0313	3	B	100	104	3
	The Essential Baking Company - Gluten Free Bread	1 slice (42g)	1	42	Day 2	Lunch - 1:00pm	120	1.2	15.6	2.4	2.4	6	1.8	0	0	1.008	1.26	1.26	126	0	0	0	0.0924	0	0	0	0	0	0	0	0	0.0168	0.482	0.0645	2	A	100	104	3
	Udi's - GF Wholegrain bread	grams	73.5	73.5	Day 2	Lunch - 1:30pm	210	6	33	3	4.5	6	0	0	30	0.54	60.4857	162.555	104.286	0	0	0	0.49275	0.495357	0.226821	5.24036	23.0732	0	23.0732	23.0732	0.202054	0	1.27229	0.0816036	3	B	100	104	3
	The Essential Baking Company - Gluten Free Bread	1 slice (42g)	2	84	Day 1	Breakfast - 7:00am	240	2.4	31.2	4.8	4.8	12	3.6	0	0	2.016	2.52	2.52	252	0	0	0	0.1848	0	0	0	0	0	0	0	0	0.0336	0.964	0.129	2	A	100	104	3
	The Essential Baking Company - Gluten Free Bread	1 slice (42g)	2	84	Day 2	Breakfast - 7:00am	240	2.4	31.2	4.8	4.8	12	3.6	0	0	2.016	2.52	2.52	252	0	0	0	0	0	0	0	0	0	0	0	0	0.0336	0.964	0.129	2	A	100	104	3
	The Essential Baking Company - Gluten Free Bread	1 slice (42g)	2	84	Day 1	Breakfast - 7:30am	240	2.4	31.2	4.8	4.8	12	3.6	0	0	2.016	2.52	2.52	252	0	0	0	0.1848	0	0	0	0	0	0	0	0	0.0336	0.964	0.129	2	A	100	104	3
	The Essential Baking Company - Gluten Free Bread	1 slice (42g)	2	84	Day 2	Breakfast - 7:00am	240	2.4	31.2	4.8	4.8	12	3.6	0	0	2.016	2.52	2.52	252	0	0	0	0.1848	0	0	0	0	0	0	0	0	0.0336	0.964	0.129	2	A	100	104	3
	Udi's - GF Wholegrain bread	grams	25	25	Day 1	Breakfast - 6:50am	71.4	2.041	11.2	1.02	1.53	2.041	0	0	10.2	0.184	20.7143	55.6696	35.7143	0	0	0	0.16875	0.169643	0.0776786	1.79464	7.90179	0	7.90179	7.90179	0.0691964	0	0.435714	0.0279464	3	B	100	104	3
	Udi's - GF Wholegrain bread	grams	25	25	Day 2	Breakfast - 6:30am	71.4	2.041	11.2	1.02	1.53	2.041	0	0	10.2	0.184	20.7143	55.6696	35.7143	0	0	0	0.16875	0.169643	0.0776786	1.79464	7.90179	0	7.90179	7.90179	0.0691964	0	0.435714	0.0279464	3	B	100	104	3
	Udi's - GF Wholegrain bread	grams	25	25	Day 3	Breakfast - 9:45am	71.4	2.041	11.2	1.02	1.53	2.041	0	0	10.2	0.184	20.7143	55.6696	35.7143	0	0	0	0.16875	0.169643	0.0776786	1.79464	7.90179	0	7.90179	7.90179	0.0691964	0	0.435714	0.0279464	3	B	100	104	3
	Western family - gluten free whole grain bread	1 slice (27g)	1	27	Day 2	Breakfast - 7:00am	77	1.1	13	0.55	1.1	2.8	0	0	27.55	0.2204	21.6	0	143	0	0	0	0.176	0.1763	0.081	1.8	8.1	0	8.1	8.1	0.0722	0	0.45	0.029	3	B	100	104	3
	Western family - gluten free whole grain bread	1 slice (27g)	1	27	Day 1	Breakfast - 7:00am	77	1.1	13	0.55	1.1	2.8	0	0	27.55	0.2204	21.6	0	143	0	0	0	0.176	0.1763	0.081	1.8	8.1	0	8.1	8.1	0.0722	0	0.45	0.029	3	B	100	104	3
	Co-Op - Multi Grain Bread With Whole Grains	2 slices (100g)	1	100	Day 3	Dinner - 7:30pm	285	4.08	46.94	2	4	10.2	0	0	102.04	0.816	80	0	530	0	0	0	0.65	0.653	0.3	6.81	30	0	30	30	0.267	0	1.654	0.1059	3	B	100	104	3
	Bread - Little Northern Bakehouse Seeds and Grains Gluten Free	1 slice (28.5g)	2	60	Day 1	Breakfast - 6:00am	170	2	32	6	4	6	0.5	0	40	1.44	48	50	240	0	0	0	0.39	0.3918	0.18	4.0861	18	0	18	18	0.1604	0	0.9924	0.0636	3	B	100	104	3
	Bread - Little Northern Bakehouse Seeds and Grains Gluten Free	1 slice (28.5g)	2	60	Day 2	Breakfast - 6:15am	170	2	32	6	4	6	0.5	0	40	1.44	48	50	240	0	0	0	0.39	0.3918	0.18	4.0861	18	0	18	18	0.1604	0	0.9924	0.0636	3	B	100	104	3
	Bread - Little Northern Bakehouse Seeds and Grains Gluten Free	1 slice (28.5g)	2	60	Day 3	Breakfast - 7:25am	170	2	32	6	4	6	0.5	0	40	1.44	48	50	240	0	0	0	0.39	0.3918	0.18	4.0861	18	0	18	18	0.1604	0	0.9924	0.0636	3	B	100	104	3
	Bread - Little Northern Bakehouse Seeds and Grains Gluten Free	1 slice (28.5g)	2	60	Day 1	Breakfast - 8:00am	170	2	32	6	4	6	0.5	0	40	1.44	48	50	240	0	0	0	0.39	0.3918	0.18	4.0861	18	0	18	18	0.1604	0	0.9924	0.0636	3	B	100	104	3
	Bread - Little Northern Bakehouse Seeds and Grains Gluten Free	1 slice (28.5g)	2	60	Day 2	Breakfast - 8:52am	170	2	32	6	4	6	0.5	0	40	1.44	48	50	240	0	0	0	0.39	0.3918	0.18	4.0861	18	0	18	18	0.1604	0	0.9924	0.0636	3	B	100	104	3
	Western family - gluten free whole grain bread	grams	28	28	Day 2	Breakfast - 6:00am	77.8	1.037	16.6	2.074	2.074	2.074	0	0	10.4	0.373	21.6	0	134.8	0	0	0	0.176	0.1763	0.081	1.8	8.1	0	8.1	8.1	0.0722	0	0.45	0.029	3	B	100	104	3
	Western family - gluten free whole grain bread	grams	57	57	Day 1	Breakfast - 4:00am	158.3	2.111	33.8	4.222	4.222	4.222	0	0	21.1	0.76	43.2	0	274.4	0	0	0	0.352	0.3526	0.162	3.6	16.2	0	16.2	16.2	0.1444	0	0.9	0.058	3	B	100	104	3
	Gluten Free Bread	1 slice (100g)	1	100	Day 3	Breakfast - 10:00am	276	3	41	0	3	12	0	0	0	0	3	3	586	0	0	0	0.22	0	0	0	0	0	0	0	0	0.04	1.15	0.153	2	A	100	104	3
	Gluten Free Bread	1 slice (100g)	1	100	Day 3	Breakfast	276	3	41	0	3	12	0	0	0	0	3	3	586	0	0	0	0.22	0	0	0	0	0	0	0	0	0.04	1.15	0.153	2	A	100	104	3
	Gluten Free White Bread - Glutino	grams	64	64	Day 3	Breakfast - 8:30am	176.6	2.207	26.5	0	2.207	8.828	0	0	0	0	1.92	1.92	375.2	0	0	0	0.141	0	0	0	0	0	0	0	0	0.0256	0.7347	0.098	2	A	100	104	3
	Gluten Free White Bread - Glutino	1 slice (29g)	2	58	Day 2	Breakfast	160.027	2.00012	23.9909	0	2.00012	7.99961	0	0	0	0	1.74	1.74	340.003	0	0	0	0.127424	0	0	0	0	0	0	0	0	0.0232	0.66577	0.0887576	2	A	100	104	3
	Gluten Free White Bread - Glutino	grams	66	66	Day 3	Lunch	182.1	2.276	27.3	0	2.276	9.103	0	0	0	0	1.98	1.98	386.9	0	0	0	0.145	0	0	0	0	0	0	0	0	0.0264	0.7576	0.101	2	A	100	104	3
	Gluten Free White Bread - Glutino	grams	66	66	Day 1	Breakfast - 7:00am	182.1	2.276	27.3	0	2.276	9.103	0	0	0	0	1.98	1.98	386.9	0	0	0	0.145	0	0	0	0	0	0	0	0	0.0264	0.7576	0.101	2	A	100	104	3
	Gluten Free White Bread - Glutino	grams	66	66	Day 2	Breakfast - 9:00am	182.1	2.276	27.3	0	2.276	9.103	0	0	0	0	1.98	1.98	386.9	0	0	0	0.145	0	0	0	0	0	0	0	0	0.0264	0.7576	0.101	2	A	100	104	3
	Gluten Free White Bread - Glutino	grams	66	66	Day 3	Breakfast - 8:30am	182.1	2.276	27.3	0	2.276	9.103	0	0	0	0	1.98	1.98	386.9	0	0	0	0.145	0	0	0	0	0	0	0	0	0.0264	0.7576	0.101	2	A	100	104	3
	Gluten Free White Bread - Glutino	grams	63	63	Day 2	Breakfast - 8:30am	173.8	2.172	26.1	0	2.172	8.69	0	0	0	0	189	1.89	369.3	0	0	0	0.139	0	0	0	0	0	0	0	0	0.0252	0.7232	0.0965	2	A	100	104	3
	Gluten Free White Bread - Glutino	1 slice (29g)	1	29	Day 3	Breakfast - 7:30am	80	1	12	0	1	4	0	0	0	0	0.87	0.87	170	0	0	0	0.064	0	0	0	0	0	0	0	0	0.0116	0.3329	0.0444	2	A	100	104	3
	Care Bakery - White Bread	grams	45	45	Day 1	Dinner - 7:00pm	124.138	1.55172	18.6207	0	1.55172	5.43103	0	0	0	0	1.35	1.35	263.793	0	0	0	0.099	0	0	0	0	0	0	0	0	0.018	0.516569	0.0688966	2	A	100	104	3
	Gluten Free Multigrain Bread - Glutino	1 slice (29g)	2	58	Day 1	Lunch - 4:00pm	160	2	26	2	2	8	0	0	0	0	10	80	340	0	0	0	0	0.114	0.105	1.2	7	0	7	7	0	0	0	0	3	B	100	104	3
	Gluten Free Multigrain Bread - Glutino	1 slice (29g)	2	58	Day 2	Breakfast - 7:45am	160	2	26	2	2	8	0	0	0	0	10	80	340	0	0	0	0	0.114	0.105	1.2	7	0	7	7	0	0	0	0	3	B	100	104	3
	Gluten Free White Bread - Glutino	1 slice (29g)	2	58	Day 1	Breakfast - 9:15am	160	2	24	0	2	8	0	0	0	0	1.74	1.74	340	0	0	0	0.1276	0	0	0	0	0	0	0	0	0.0232	0.6658	0.0888	2	A	100	104	3
	Gluten Free White Bread - Glutino	1 slice (29g)	2	58	Day 2	Breakfast - 7:00am	160	2	24	0	2	8	0	0	0	0	1.74	1.74	340	0	0	0	0.1276	0	0	0	0	0	0	0	0	0.0232	0.6658	0.0888	2	A	100	104	3
	Gluten Free White Bread - Glutino	1 slice (29g)	2	58	Day 3	Lunch - 12:00pm	160	2	24	0	2	8	0	0	0	0	1.74	1.74	340	0	0	0	0.1276	0	0	0	0	0	0	0	0	0.0232	0.6658	0.0888	2	A	100	104	3
	Gluten Free Multigrain Bread - Glutino	1 slice (29g)	2	58	Day 2	Lunch - 12:45pm	160	2	26	2	2	8	0	0	0	0	10	80	340	0	0	0	0	0.114	0.105	1.2	7	0	7	7	0	0	0	0	3	B	100	104	3
	Gluten Free Multigrain Bread - Glutino	1 slice (29g)	2	58	Day 2	Lunch - 12:00pm	160	2	26	2	2	8	0	0	0	0	10	80	340	0	0	0	0	0.114	0.105	1.2	7	0	7	7	0	0	0	0	3	B	100	104	3
	Care Bakery - Deli / Hot Dog Bun	grams	100	100	Day 3	Dinner - 7:00pm	275.862	3.44828	41.3793	0	3.44828	12.069	0	0	0	0	3	3	586.207	0	0	0	0.22	0	0	0	0	0	0	0	0	0.04	1.14793	0.153103	2	A	100	104	3
	Care Bakery - White Bread	grams	171	171	Day 1	Lunch - 1:00pm	471.724	5.89655	70.7586	0	5.89655	20.6379	0	0	0	0	5.13	5.13	1002.41	0	0	0	0.3762	0	0	0	0	0	0	0	0	0.0684	1.96296	0.261807	2	A	100	104	3
	Care Bakery - White Bread	grams	51	51	Day 1	Dinner - 5:30pm	140.69	1.75862	21.1034	0	1.75862	6.15517	0	0	0	0	1.53	1.53	298.966	0	0	0	0.1122	0	0	0	0	0	0	0	0	0.0204	0.585445	0.0780828	2	A	100	104	3
	Care Bakery - White Bread	grams	68	68	Day 2	Dinner - 7:00pm	187.586	2.34483	28.1379	0	2.34483	8.2069	0	0	0	0	2.04	2.04	398.621	0	0	0	0.1496	0	0	0	0	0	0	0	0	0.0272	0.780593	0.10411	2	A	100	104	3
	Gluten Free White Bread - Glutino	grams	45	45	Day 1	Breakfast - 8:30am	124.1	1.552	18.6	0	1.552	6.207	0	0	0	0	1.35	1.35	263.8	0	0	0	0.099	0	0	0	0	0	0	0	0	0.018	0.5166	0.0689	2	A	100	104	3
	Gluten Free Bread	1 slice (100g)	2	200	Day 1	Lunch - 12:30pm	551	7	83	0	7	24	0	0	0	0	6	6	1172	0	0	0	0.44	0	0	0	0	0	0	0	0	0.08	2.296	0.306	2	A	100	104	3
	Gluten Free Bread	1 slice (100g)	2	200	Day 2	Breakfast - 11:00am	551	7	83	0	7	24	0	0	0	0	6	6	1172	0	0	0	0.44	0	0	0	0	0	0	0	0	0.08	2.296	0.306	2	A	100	104	3
	Gluten Free Bread	1 slice (100g)	2	200	Day 2	Lunch - 3:00pm	551	7	83	0	7	24	0	0	0	0	6	6	1172	0	0	0	0.44	0	0	0	0	0	0	0	0	0.08	2.296	0.306	2	A	100	104	3
	Gluten Free Bread	1 slice (100g)	2	200	Day 1	Lunch - 12:20pm	551	7	83	0	7	24	0	0	0	0	6	6	1172	0	0	0	0.44	0	0	0	0	0	0	0	0	0.08	2.296	0.306	2	A	100	104	3
	Gluten Free Bread	1 slice (100g)	2	200	Day 3	Dinner	551	7	83	0	7	24	0	0	0	0	6	6	1172	0	0	0	0.44	0	0	0	0	0	0	0	0	0.08	2.296	0.306	2	A	100	104	3
	Western Family - GF White Bread	grams	57	57	Day 1	Breakfast - 8:15am	157	2	24	0	2	6.88	0	0	0	0	1.71	1.71	334	0	0	0	0.125	0	0	0	0	0	0	0	0	0.0228	0.65	0.087	2	A	100	104	3
	Gluten Free Bun - Little Northern Bakehouse	1 bun (80g)	1	80	Day 1	Lunch - 1:00pm	220	1	44	5	6	5	0.5	0	20	0.5	2.4	50	340	0	0	0	0.176	0	0	0	0	0	0	0	0	0.032	0.918	0.1225	2	A	100	104	3
	Invermere Bakery - Gluten Free Bun	1 bun (59g)	1	59	Day 3	Dinner - 6:30pm	162	2	24	0	2	7	0.142	0	0	0	1.77	1.77	345.86	0	0	0	0.1298	0	0	0	0	0	0	0	0	0.0236	0.677	0.0903	2	A	100	104	3
	Udi's - GF Wholegrain bread	grams	24	24	Day 1	Breakfast - 9:00am	65.2174	2.6087	11.1304	2.17391	1.51739	2.02304	0	0	10.1304	0.182174	20.1739	54.2174	121.739	0	0	0	0.163913	0.169565	0.0756522	1.74783	7.69565	0	7.69565	7.69565	0.0673913	0	0.424348	0.0273913	3	B	100	104	3
	Udi's - Gluten Free Hamburger Bun	1 bun (74g)	1	74	Day 2	Lunch - 11:36am	200	4	36	4	5	5	0.664	3.318	20	0.72	2.2	2.2	360	0	0.796	0	0.1628	0	0	0	0	0	0	0	0	0.0296	0.8495	0.113	2	A	100	104	3
	Udi's - Gluten Free Hamburger Bun	1 bun (74g)	1	74	Day 2	Dinner - 8:30pm	200	4	36	4	5	5	0.664	3.318	20	0.72	2.2	2.2	360	0	0.796	0	0.1628	0	0	0	0	0	0	0	0	0.0296	0.8495	0.113	2	A	100	104	3
	Udi's - Gluten Free Hamburger Bun	grams	82	82	Day 2	Dinner - 6:30pm	221.6	4.432	39.9	4.432	5.541	5.541	0.736	3.677	22.2	0.798	2.43784	2.43784	398.919	0	0.882054	0	0.1804	0	0	0	0	0	0	0	0	0.0328	0.941338	0.125216	2	A	100	104	3
	Muffin, oat bran (wheat free-product) / Muffin, son davoine (sans farine de blé)	grams	80	80	Day 2	Breakfast - 10:20am	216	5.6	38.6	3.68	6.576	5.92	0.87	0	50.4	3.36	125.6	405.6	314.4	0	0	0	0.528	0.21	0.076	0.336	71.2	56.8	14.4	111	0.129	0.008	2.931	0.366	4	C	100	107	3
	Muffin, oat bran (wheat free-product) / Muffin, son davoine (sans farine de blé)	grams	80	80	Day 3	Lunch - 3:00pm	216	5.6	38.6	3.68	6.576	5.92	0.87	0	50.4	3.36	125.6	405.6	314.4	0	0	0	0.528	0.21	0.076	0.336	71.2	56.8	14.4	111	0.129	0.008	2.931	0.366	4	C	100	107	3
	Muffin, oat bran (wheat free-product) / Muffin, son davoine (sans farine de blé)	grams	82	82	Day 1	Breakfast - 1:00pm	221.4	5.74	39.6	3.772	6.74	6.068	0.891	0	51.7	3.444	128.7	415.7	322.3	0	0	0	0.541	0.215	0.078	0.344	73	58.2	14.8	113.7	0.132	0.008	3.004	0.376	4	C	100	107	3
	Bread, White, commercially prep, crumbs/cubes/slices	grams	52	52	Day 2	Breakfast	138.3	4.602	25.7	1.404	2.948	1.732	0.363	0	74.9	1.877	12	65.5	254.8	0	0	0	0.114	0.277	0.126	2.486	57.7	44.7	13	88.9	0.045	0	0.741	0.086	2	A	100	104	3
	Udi's - GF Wholegrain bread	grams	57	57	Day 3	Dinner - 6:45pm	150	6	25.6	5	3.49	4.653	0	0	23.3	0.419	46.4	124.7	280	0	0	0	0.377	0.39	0.174	4.02	17.7	0	17.7	17.7	0.155	0	0.976	0.063	3	B	100	104	3
	Udi's - GF Wholegrain bread	grams	25	25	Day 2	Breakfast - 6:00am	65.2174	2.6087	11.1304	2.17391	1.51739	2.02304	0	0	10.1304	0.182174	20.1739	54.2174	121.739	0	0	0	0.163913	0.169565	0.0756522	1.74783	7.69565	0	7.69565	7.69565	0.0673913	0	0.424348	0.0273913	3	B	100	104	3
	Udi's - GF Wholegrain bread	grams	25	25	Day 3	Breakfast - 6:30am	65.2174	2.6087	11.1304	2.17391	1.51739	2.02304	0	0	10.1304	0.182174	20.1739	54.2174	121.739	0	0	0	0.163913	0.169565	0.0756522	1.74783	7.69565	0	7.69565	7.69565	0.0673913	0	0.424348	0.0273913	3	B	100	104	3
	Gluten Free Cinnamon and Raisin Loaf - Little Northern Bakehouse	1 slice (30g)	2	60	Day 2	Lunch - 1:30pm	150	1	32	3	8	3	0.3	0	20	0.4	1.8	100	220	0	0	0	0.132	0	0	0	0	0	0	0	0	0.024	0.689	0.092	2	A	100	104	3
	Gluten Free Cinnamon and Raisin Loaf - Little Northern Bakehouse	1 slice (30g)	2	60	Day 1	Breakfast - 11:30am	150	1	32	3	8	3	0.3	0	20	0.4	1.8	100	220	0	0	0	0.132	0	0	0	0	0	0	0	0	0.024	0.689	0.092	2	A	100	104	3
	Gluten Free Cinnamon and Raisin Loaf - Little Northern Bakehouse	1 slice (30g)	2	60	Day 3	Snack 1 - 10:00am	150	1	32	3	8	3	0.3	0	20	0.4	1.8	100	220	0	0	0	0.132	0	0	0	0	0	0	0	0	0.024	0.689	0.092	2	A	100	104	3
	Bread - Little Northern Bakehouse Seeds and Grains Gluten Free	1 slice (28.5g)	4	112	Day 1	Lunch - 12:27pm	280	4	64	12	8	12	0.933333	0	80	2.88	89.6	93.3333	480	0	0	0	0.728	0.73136	0.336	7.62739	33.6	0	33.6	33.6	0.299413	0	1.85248	0.11872	3	B	100	104	3
	Bread - Little Northern Bakehouse Seeds and Grains Gluten Free	grams	32	32	Day 2	Breakfast - 7:30am	78.6	1.123	18	3.368	2.246	3.368	0.266667	0	22.5	0.808	25.6	26.6667	134.7	0	0	0	0.208	0.20896	0.096	2.17925	9.6	0	9.6	9.6	0.0855467	0	0.52928	0.03392	3	B	100	104	3
	Bread - Little Northern Bakehouse Seeds and Grains Gluten Free	1 slice (28.5g)	1	28.5	Day 3	Snack 1 - 10:00am	70	1	16	3	2	3	0.2375	0	20	0.72	22.8	23.75	120	0	0	0	0.18525	0.186105	0.0855	1.9409	8.55	0	8.55	8.55	0.07619	0	0.47139	0.03021	3	B	100	104	3
	Bread - Little Northern Bakehouse Seeds and Grains Gluten Free	1 slice (28.5g)	2	57	Day 1	Lunch - 1:30pm	140	2	32	6	4	6	0.475	0	40	1.44	45.6	47.5	240	0	0	0	0.3705	0.37221	0.171	3.8818	17.1	0	17.1	17.1	0.15238	0	0.94278	0.06042	3	B	100	104	3
	Bread - Little Northern Bakehouse Seeds and Grains Gluten Free	1 slice (28.5g)	2	57	Day 2	Dinner	140	2	32	6	4	6	0.475	0	40	1.44	45.6	47.5	240	0	0	0	0.3705	0.37221	0.171	3.8818	17.1	0	17.1	17.1	0.15238	0	0.94278	0.06042	3	B	100	104	3
	Bread - Little Northern Bakehouse Seeds and Grains Gluten Free	1 slice (28.5g)	2	57	Day 2	Lunch - 11:00am	140	2	32	6	4	6	0.475	0	40	1.44	45.6	47.5	240	0	0	0	0.3705	0.37221	0.171	3.8818	17.1	0	17.1	17.1	0.15238	0	0.94278	0.06042	3	B	100	104	3
	Bread - Little Northern Bakehouse Seeds and Grains Gluten Free	1 slice (28.5g)	2	57	Day 3	Breakfast - 11:00am	140	2	32	6	4	6	0.475	0	40	1.44	45.6	47.5	240	0	0	0	0.3705	0.37221	0.171	3.8818	17.1	0	17.1	17.1	0.15238	0	0.94278	0.06042	3	B	100	104	3
	Bread - Little Northern Bakehouse Seeds and Grains Gluten Free	1 slice (28.5g)	2	57	Day 1	Breakfast - 9:00am	140	2	32	6	4	6	0.475	0	40	1.44	45.6	47.5	240	0	0	0	0.3705	0.37221	0.171	3.8818	17.1	0	17.1	17.1	0.15238	0	0.94278	0.06042	3	B	100	104	3
	Bread - Little Northern Bakehouse Seeds and Grains Gluten Free	1 slice (28.5g)	2	57	Day 1	Lunch - 12:45pm	140	2	32	6	4	6	0.475	0	40	1.44	45.6	47.5	240	0	0	0	0.3705	0.37221	0.171	3.8818	17.1	0	17.1	17.1	0.15238	0	0.94278	0.06042	3	B	100	104	3
	Bread - Little Northern Bakehouse Seeds and Grains Gluten Free	1 slice (28.5g)	2	57	Day 3	Breakfast - 7:00am	140	2	32	6	4	6	0.475	0	40	1.44	45.6	47.5	240	0	0	0	0.3705	0.37221	0.171	3.8818	17.1	0	17.1	17.1	0.15238	0	0.94278	0.06042	3	B	100	104	3
	Bread - Little Northern Bakehouse Seeds and Grains Gluten Free	1 slice (28.5g)	2	57	Day 3	Lunch - 11:44am	140	2	32	6	4	6	0.475	0	40	1.44	45.6	47.5	240	0	0	0	0.3705	0.37221	0.171	3.8818	17.1	0	17.1	17.1	0.15238	0	0.94278	0.06042	3	B	100	104	3
	Bread - Little Northern Bakehouse Seeds and Grains Gluten Free	grams	70	70	Day 3	Lunch - 12:45pm	171.9	2.456	39.3	7.368	4.913	7.368	0.583333	0	49.1	1.768	56	58.3333	294.7	0	0	0	0.455	0.4571	0.21	4.76712	21	0	21	21	0.187133	0	1.1578	0.0742	3	B	100	104	3
	Gluten Free Super Seeded Multigrain Bread - Essential Baking Company	1 slice (33g)	1	33	Day 3	Lunch - 1:00pm	80	2	12	4	4	4	0	0	22	0.28	26.27	70.95	140	0	0	0	0.209	0.209	0.099	2.25	9.9	0	9.9	9.9	0.088	0	0.549	0.035	3	B	100	104	3
	Gluten Free Super Seeded Multigrain Bread - Essential Baking Company	1 slice (33g)	2	66	Day 1	Lunch - 1:30pm	160	4	24	8	8	8	0	0	44	0.56	52.54	141.9	280	0	0	0	0.418	0.43	0.198	4.5	19.8	0	19.8	19.8	0.176	0	1.098	0.07	3	B	100	104	3
	Gluten Free Super Seeded Multigrain Bread - Essential Baking Company	grams	157	157	Day 3	Breakfast - 9:30am	380.606	9.51515	57.0909	19.0303	19.0303	19.0303	0	0	104.667	1.33212	124.982	337.55	666.061	0	0	0	0.994333	1.02288	0.471	10.7045	47.1	0	47.1	47.1	0.418667	0	2.61191	0.166515	3	B	100	104	3
	Gluten Free Cinnamon and Raisin Loaf - Little Northern Bakehouse	grams	31	31	Day 1	Dinner - 6:00pm	75	0.5	16	1.5	4	1.5	0.15	0	10	0.2	0.9	50	110	0	0	0	0.0682	0	0	0	0	0	0	0	0	0.0124	0.356	0.0475	2	A	100	104	3
	Gluten Free Millet and Chia Loaf - Little Northern Bakehouse	1 slice (30g)	1	30	Day 2	Breakfast - 10:00am	70	2	16	3	2	2	0.158	0	10.5	0.36	24	45	130	0	0	0	0.195	0.1959	0.09	2.04	9	0	9	9	0.0802	0	0.4962	0.0318	3	B	100	104	3
	Gluten Free Millet and Chia Loaf - Little Northern Bakehouse	1 slice (30g)	1	30	Day 3	Breakfast - 6:00am	70	2	16	3	2	2	0.158	0	10.5	0.36	24	45	130	0	0	0	0.195	0.1959	0.09	2.04	9	0	9	9	0.0802	0	0.4962	0.0318	3	B	100	104	3
	Gluten Free Millet and Chia Loaf - Little Northern Bakehouse	1 slice (30g)	2	60	Day 3	Lunch - 12:00PM	140	4	32	6	4	4	0.316	0	21	0.72	48	90	260	0	0	0	0.39	0.3918	0.18	4.08	18	0	18	18	0.1604	0	0.9924	0.0636	3	B	100	104	3
	Gluten Free Millet and Chia Loaf - Little Northern Bakehouse	grams	63	63	Day 2	Lunch - 2:00pm	147	4.2	33.6	6.3	4.2	4.2	0.332	0	22.1	0.756	50.4	94.5	273	0	0	0	0.4095	0.4114	0.189	4.29	18	0	18	18	0.1684	0	1.0421	0.0667	3	B	100	104	3
	English muffin, plain (also sourdough) / Muffin anglais, nature (aussi levain)	1 ounce (28.35g)	1	28.35	Day 3	Breakfast - 8:50am	64.4	2.515	12.5	0.992	1.001	0.479	0.208	0	46.2	1.134	6.804	30.9	120.5	0	0.51	0	0.088	0.135	0.071	1.154	26.9	15.6	11.3	37.8	0.015	0.011	0.127	0.014	4	C	100	107	3
	Care Bakery - Deli / Hot Dog Bun	grams	212	212	Day 2	Lunch - 1:30pm	475.9	0	101.7	4.327	10.8	4.327	0	32.4	0	2.336	6.36	6.36	713.9	0	7.787	0	0.4664	0	0	0	0	0	0	0	0	0.0848	2.43361	0.324579	2	A	100	104	3
	Care Bakery - White Hamburger Bun (Gluten Free)	1 bun (108g)	1	108	Day 3	Dinner - 8:00pm	240	1	51	2	6	3	0	65	0	1.08	3.24	3.24	360	0	4.8	0	0.2376	0	0	0	0	0	0	0	0	0.0432	1.2398	0.1654	2	A	100	104	3
	Care Bakery - White Hamburger Bun (Gluten Free)	grams	108	108	Day 3	Dinner - 7:00pm	240	1	51	2	6	3	0	65	0	1.08	3.24	3.24	360	0	4.8	0	0.2376	0	0	0	0	0	0	0	0	0.0432	1.2398	0.1654	2	A	100	104	3
	Care Bakery - White Hamburger Bun (Gluten Free)	grams	109	109	Day 2	Dinner - 6:00pm	242.2	1.009	51.5	2.019	6.056	3.028	0	65.6	0	1.09	3.24	3.24	363.3	0	4.844	0	0.2376	0	0	0	0	0	0	0	0	0.0432	1.2398	0.1654	2	A	100	104	3
	Gluten Free Bun - Little Northern Bakehouse	1 bun (100g)	1	100	Day 1	Lunch - 12:30pm	220	1	44	5	6	5	0.5	0	20	0.5	2.4	50	340	0	0	0	0.176	0	0	0	0	0	0	0	0	0.032	0.918	0.1225	2	A	100	104	3
	Gluten Free Bun - Little Northern Bakehouse	1 bun (100g)	1	100	Day 1	Dinner - 7:30PM	220	1	44	5	6	5	0.5	0	20	0.5	2.4	50	340	0	0	0	0.176	0	0	0	0	0	0	0	0	0.032	0.918	0.1225	2	A	100	104	3
	Tortilla, ready-to-bake / fry, corn / Tortilla, prêt-à-cuire / à frire, maïs	grams	79	79	Day 3	Lunch - 12:01pm	172.2	4.503	35.3	4.977	0.695	2.252	0.358	0	64	0.972	56.9	146.9	35.6	0	0	0	0.221	0.074	0.051	1.183	3.95	0	3.95	3.95	0.173	0	1.094	0.027	4	A	100	105	3
	Tortilla, ready-to-bake / fry, corn / Tortilla, prêt-à-cuire / à frire, maïs	1 tortilla (15.2cm dia) (19g)	1	19	Day 2	Breakfast - 8:30am	41.4	1.083	8.482	1.197	0.167	0.542	0.086	0	15.4	0.234	13.7	35.3	8.55	0	0	0	0.053	0.018	0.012	0.285	0.95	0	0.95	0.95	0.042	0	0.263	0.006	4	A	100	105	3
	Tortilla, ready-to-bake / fry, corn / Tortilla, prêt-à-cuire / à frire, maïs	1 tortilla (15.2cm dia) (19g)	1	19	Day 2	Dinner - 5:30pm	41.4	1.083	8.482	1.197	0.167	0.542	0.086	0	15.4	0.234	13.7	35.3	8.55	0	0	0	0.053	0.018	0.012	0.285	0.95	0	0.95	0.95	0.042	0	0.263	0.006	4	A	100	105	3
	Gluten Free Millet and Chia Loaf - Little Northern Bakehouse	1 slice (30g)	1	30	Day 1	Breakfast - 6:30am	65.3	1.867	14.9	2.8	1.867	1.867	0.147	0	9.82	0.336	24	42	121.3	0	0	0	0.195	0.1959	0.09	2.04	9	0	9	9	0.0802	0	0.4962	0.0318	3	B	100	104	3
	Gluten Free Millet and Chia Loaf - Little Northern Bakehouse	1 slice (30g)	1	30	Day 1	Dinner - 7:30pm	65.3	1.867	14.9	2.8	1.867	1.867	0.147	0	9.82	0.336	24	42	121.3	0	0	0	0.195	0.1959	0.09	2.04	9	0	9	9	0.0802	0	0.4962	0.0318	3	B	100	104	3
	Lakeview Bakery - Gluten Free Bread	grams	79	79	Day 2	Dinner - 5:45pm	170.8	2.135	32	0	2.135	6.405	0	0	0	0	2.37	2.37	463.103	0	0	0	0.1738	0	0	0	0	0	0	0	0	0.0316	0.906866	0.120952	2	A	100	104	3
	Lakeview Bakery - Gluten Free Bread	grams	81	81	Day 3	Lunch - 12:15pm	175.1	2.189	32.8	0	2.189	6.567	0	0	0	0	2.43	2.43	474.828	0	0	0	0.1782	0	0	0	0	0	0	0	0	0.0324	0.929824	0.124014	2	A	100	104	3
	Lakeview Bakery - Gluten Free Bread	grams	65	65	Day 1	Lunch - 12:30pm	140.5	1.757	26.4	0	1.757	5.27	0	0	0	0	1.95	1.95	131.8	0	0	0	0.143	0	0	0	0	0	0	0	0	0.026	0.746155	0.0995172	2	A	100	104	3
	Nature's Path - Gluten Free Pumpkin Spice Waffles	2 waffles (70g)	0.5	35	Day 3	Breakfast	73.5	0.7	10.5	0.7	2.1	2.45	0.35	0	21	0.378	39.9	96.25	136.5	100	0	0	0	0.0259259	0.0362963	2.25123	2.32901	0	2.32901	2.32901	0	0	0	0	4	D	100	107	3
	Gluten Free Mixed Grains with Raisins Cereal	grams	94	94	Day 1	Breakfast - 8:23am	186.9	4.136	16.9	2.632	3.384	12	3.76	0	37.6	1.286	104.34	431.3	277.1	62.67	25	0	0	0.161	0	3.21	6.58	0	6.58	6.58	0	0	0	0	5	A	100	108	1
	Gluten Free Mixed Grains with Raisins Cereal	grams	106	106	Day 2	Breakfast - 6:00am	210.7	4.664	19.1	2.968	3.816	13.6	4.24	0	42.4	1.45	117.66	486.3	312.5	70.67	28.2	0	0	0.181	0	3.63	7.42	0	7.42	7.42	0	0	0	0	5	A	100	108	1
	Gluten Free Mixed Grains with Raisins Cereal	grams	105	105	Day 3	Breakfast - 5:40am	208.7	4.62	18.9	2.94	3.78	13.4	4.2	0	42	1.436	117.66	481.7	309.5	70.67	28	0	0	0.181	0	3.63	7.42	0	7.42	7.42	0	0	0	0	5	A	100	108	1
	Vermicelli, made from soy, cooked / Vermicelle de soya, cuits	100 grams (100g)	1	100	Day 3	Dinner - 6:30pm	179	0.054	44.4	2.111	10.3	0.054	0.008	0	29.8	0.98	1.082	1.624	2.165	1.082	0	0	0.103	0	0	0	0	0	0	0	0	0	0.021	0.002	1	B	100	102	3
	President's Choice - Gluten Free Pancake mix	grams	400	400	Day 1	Dinner - 6:30pm	712	6.5	182	0	39	0	0	0	143	0	0	0	1885	0	0	0	0	0.016	0	0	0	0	0	0	0	0	0	0	4	F	100	107	3
	Rice, cooked, NFS	1 cup, cooked (158g)	0.5	79	Day 2	Dinner - 7:00pm	106.6	2.086	21.8	0.316	0.04	0.861	0.18	0	7.9	0.932	9.48	27.6	293.1	6.32	0	0	0.103	0.126	0.01	1.144	45	42.7	2.37	75	0.072	0	0.225	0.026	1	B	100	103	3
	Grain, Rice, White, Long grain, Regular, enriched, ckd	1 cup (158g)	0.33	52.14	Day 3	Dinner	67.8	1.403	14.7	0.209	0.026	0.146	0.04	0	5.214	0.626	6.257	18.2	0.521	0	0	0	0.021	0.085	0.007	0.77	30.2	28.7	1.564	50.6	0.048	0	0.032	0.007	1	B	100	102	3
	Grains, rice, white, long-grain, regular, cooked / Grains céréaliers, riz blanc, grain long, ordinaire, cuit	ounces	3.54	100.36	Day 1	Dinner - 6:45pm	130.5	2.7	28.3	0.422	0.05	0.281	0.077	0	10	0.201	12	35.1	1.004	0	0	0	0.04	0.02	0.013	0.401	3.011	0	3.011	3.011	0.093	0	0.062	0.013	1	B	100	102	3
	Grain, Rice, White, Long grain, Regular, enriched, ckd	1 cup (158g)	1.25	197.5	Day 2	Lunch - 10:45am	256.8	5.313	55.6	0.79	0.099	0.553	0.152	0	19.8	2.37	23.7	69.1	1.975	0	0	0	0.079	0.322	0.026	2.915	114.6	108.6	5.925	191.6	0.184	0	0.122	0.026	1	B	100	102	3
	Grains, rice, white, long-grain, regular, cooked / Grains céréaliers, riz blanc, grain long, ordinaire, cuit	grams	60	60	Day 2	Dinner - 7:20pm	78	1.614	16.9	0.252	0.03	0.168	0.046	0	6	0.12	7.2	21	0.6	0	0	0	0.024	0.012	0.008	0.24	1.8	0	1.8	1.8	0.056	0	0.037	0.008	1	B	100	102	3
	Grains, rice, white, long-grain, regular, cooked / Grains céréaliers, riz blanc, grain long, ordinaire, cuit	grams	60	60	Day 3	Lunch - 12:00pm	78	1.614	16.9	0.252	0.03	0.168	0.046	0	6	0.12	7.2	21	0.6	0	0	0	0.024	0.012	0.008	0.24	1.8	0	1.8	1.8	0.056	0	0.037	0.008	1	B	100	102	3
	Grains, rice, white, long-grain, regular, cooked / Grains céréaliers, riz blanc, grain long, ordinaire, cuit	grams	60	60	Day 2	Dinner - 6:00pm	78	1.614	16.9	0.252	0.03	0.168	0.046	0	6	0.12	7.2	21	0.6	0	0	0	0.024	0.012	0.008	0.24	1.8	0	1.8	1.8	0.056	0	0.037	0.008	1	B	100	102	3
	Grains, rice, white, long-grain, regular, cooked / Grains céréaliers, riz blanc, grain long, ordinaire, cuit	grams	60	60	Day 3	Dinner - 6:30pm	78	1.614	16.9	0.252	0.03	0.168	0.046	0	6	0.12	7.2	21	0.6	0	0	0	0.024	0.012	0.008	0.24	1.8	0	1.8	1.8	0.056	0	0.037	0.008	1	B	100	102	3
	Grain, Rice, White, Long grain, Regular, enriched, ckd	1 cup (158g)	0.5	79	Day 1	Dinner - 7:00pm	102.7	2.125	22.3	0.316	0.04	0.221	0.061	0	7.9	0.948	9.48	27.6	0.79	0	0	0	0.032	0.129	0.01	1.166	45.8	43.4	2.37	76.6	0.073	0	0.049	0.01	1	B	100	102	3
	Grain, Rice, White, Long grain, Regular, enriched, ckd	1 cup (158g)	0.5	79	Day 2	Dinner - 6:00pm	102.7	2.125	22.3	0.316	0.04	0.221	0.061	0	7.9	0.948	9.48	27.6	0.79	0	0	0	0.032	0.129	0.01	1.166	45.8	43.4	2.37	76.6	0.073	0	0.049	0.01	1	B	100	102	3
	Grain, Rice, White, Long grain, Regular, enriched, ckd	grams	90	90	Day 2	Dinner - 5:30pm	117	2.421	25.4	0.36	0.045	0.252	0.069	0	9	1.08	10.8	31.5	0.9	0	0	0	0.036	0.147	0.012	1.328	52.2	49.5	2.7	87.3	0.084	0	0.056	0.012	1	B	100	102	3
	Grains, rice, white, long-grain, regular, cooked / Grains céréaliers, riz blanc, grain long, ordinaire, cuit	100 grams (100g)	1	100	Day 2	Dinner - 7:00pm	130	2.69	28.2	0.42	0.05	0.28	0.077	0	10	0.2	12	35	1	0	0	0	0.04	0.02	0.013	0.4	3	0	3	3	0.093	0	0.062	0.013	1	B	100	102	3
	Grains, rice, white, long-grain, regular, cooked / Grains céréaliers, riz blanc, grain long, ordinaire, cuit	100 grams (100g)	1	100	Day 3	Lunch - 11:00am	130	2.69	28.2	0.42	0.05	0.28	0.077	0	10	0.2	12	35	1	0	0	0	0.04	0.02	0.013	0.4	3	0	3	3	0.093	0	0.062	0.013	1	B	100	102	3
	Grains, rice, white, long-grain, regular, cooked / Grains céréaliers, riz blanc, grain long, ordinaire, cuit	100 grams (100g)	1	100	Day 1	Dinner - 5:30pm	130	2.69	28.2	0.42	0.05	0.28	0.077	0	10	0.2	12	35	1	0	0	0	0.04	0.02	0.013	0.4	3	0	3	3	0.093	0	0.062	0.013	1	B	100	102	3
	Grains, rice, white, long-grain, regular, cooked / Grains céréaliers, riz blanc, grain long, ordinaire, cuit	100 grams (100g)	1	100	Day 2	Lunch - 11:30am	130	2.69	28.2	0.42	0.05	0.28	0.077	0	10	0.2	12	35	1	0	0	0	0.04	0.02	0.013	0.4	3	0	3	3	0.093	0	0.062	0.013	1	B	100	102	3
	Grains, rice, white, long-grain, regular, cooked / Grains céréaliers, riz blanc, grain long, ordinaire, cuit	100 grams (100g)	1	100	Day 1	Lunch - 1:30pm	130	2.69	28.2	0.42	0.05	0.28	0.077	0	10	0.2	12	35	1	0	0	0	0.04	0.02	0.013	0.4	3	0	3	3	0.093	0	0.062	0.013	1	B	100	102	3
	Grains, rice, white, long-grain, regular, cooked / Grains céréaliers, riz blanc, grain long, ordinaire, cuit	100 grams (100g)	1	100	Day 2	Lunch - 1:00pm	130	2.69	28.2	0.42	0.05	0.28	0.077	0	10	0.2	12	35	1	0	0	0	0.04	0.02	0.013	0.4	3	0	3	3	0.093	0	0.062	0.013	1	B	100	102	3
	Grains, rice, white, long-grain, regular, cooked / Grains céréaliers, riz blanc, grain long, ordinaire, cuit	100 grams (100g)	1	100	Day 1	Dinner - 6:30pm	130	2.69	28.2	0.42	0.05	0.28	0.077	0	10	0.2	12	35	1	0	0	0	0.04	0.02	0.013	0.4	3	0	3	3	0.093	0	0.062	0.013	1	B	100	102	3
	Grain, Rice, White, Long grain, Regular, enriched, ckd	1 cup (158g)	1	158	Day 1	Lunch - 1:00pm	205.4	4.25	44.5	0.632	0.079	0.442	0.122	0	15.8	1.896	19	55.3	1.58	0	0	0	0.063	0.258	0.021	2.332	91.6	86.9	4.74	153.3	0.147	0	0.098	0.021	1	B	100	102	3
	Grain, Rice, White, Long grain, Regular, enriched, ckd	1 cup (158g)	1	158	Day 1	Lunch - 1:30pm	205.4	4.25	44.5	0.632	0.079	0.442	0.122	0	15.8	1.896	19	55.3	1.58	0	0	0	0.063	0.258	0.021	2.332	91.6	86.9	4.74	153.3	0.147	0	0.098	0.021	1	B	100	102	3
	Grain, Rice, White, Long grain, Regular, enriched, ckd	1 cup (158g)	1	158	Day 3	Dinner - 5:30pm	205.4	4.25	44.5	0.632	0.079	0.442	0.122	0	15.8	1.896	19	55.3	1.58	0	0	0	0.063	0.258	0.021	2.332	91.6	86.9	4.74	153.3	0.147	0	0.098	0.021	1	B	100	102	3
	Grain, Rice, White, Long grain, Regular, enriched, ckd	grams	200	200	Day 1	Dinner - 6:15pm	260	5.38	56.3	0.8	0.1	0.56	0.154	0	20	2.4	24	70	2	0	0	0	0.08	0.326	0.026	2.952	116	110	6	194	0.186	0	0.124	0.026	1	B	100	102	3
	Grain, Rice, White, Long grain, Regular, enriched, ckd	grams	215	215	Day 2	Dinner - 6:49pm	279.5	5.784	60.6	0.86	0.108	0.602	0.166	0	21.5	2.58	25.8	75.2	2.15	0	0	0	0.086	0.35	0.028	3.173	124.7	118.3	6.45	208.6	0.2	0	0.133	0.028	1	B	100	102	3
	Grains, rice, white, long-grain, regular, cooked / Grains céréaliers, riz blanc, grain long, ordinaire, cuit	grams	217	217	Day 3	Dinner - 7:00pm	282.1	5.837	61.1	0.911	0.108	0.608	0.167	0	21.7	0.434	26	76	2.17	0	0	0	0.087	0.043	0.028	0.868	6.51	0	6.51	6.51	0.202	0	0.135	0.028	1	B	100	102	3
	Grain, Rice, White, Long grain, Regular, enriched, ckd	1 cup (158g)	1.5	237	Day 2	Dinner - 6:00pm	308.1	6.375	66.8	0.948	0.118	0.664	0.182	0	23.7	2.844	28.4	83	2.37	0	0	0	0.095	0.386	0.031	3.498	137.5	130.3	7.11	229.9	0.22	0	0.147	0.031	1	B	100	102	3
	Grain, Rice, White, Long grain, Regular, enriched, ckd	1 cup (158g)	2	316	Day 3	Breakfast - 11:00am	410.8	8.5	89	1.264	0.158	0.885	0.243	0	31.6	3.792	37.9	110.6	3.16	0	0	0	0.126	0.515	0.041	4.664	183.3	173.8	9.48	306.5	0.294	0	0.196	0.041	1	B	100	102	3
	Grains, rice, white, long-grain, regular, cooked / Grains céréaliers, riz blanc, grain long, ordinaire, cuit	ounces	7.12	201.85	Day 3	Lunch - 12:30pm	262.4	5.43	56.9	0.848	0.101	0.565	0.155	0	20.2	0.404	24.2	70.6	2.019	0	0	0	0.081	0.04	0.026	0.807	6.056	0	6.056	6.056	0.188	0	0.125	0.026	1	B	100	102	3
	Grains, rice, white, long-grain, regular, cooked / Grains céréaliers, riz blanc, grain long, ordinaire, cuit	ounces	3.71	105.18	Day 1	Dinner	136.7	2.829	29.6	0.442	0.053	0.294	0.081	0	10.5	0.21	12.6	36.8	1.052	0	0	0	0.042	0.021	0.014	0.421	3.155	0	3.155	3.155	0.098	0	0.065	0.014	1	B	100	102	3
	Pasta, corn, cooked / Pâtes, maïs, cuites	100 grams (100g)	1.5	150	Day 1	Dinner - 7:00pm	189	3.945	41.9	7.2	0	1.095	0.153	0	1.5	0.375	54	46.5	0	4.5	0	0	0	0.08	0.034	0.834	9	0	9	9	0.087	0	0.474	0.015	1	A	100	101	3
	Pasta, corn, cooked / Pâtes, maïs, cuites	1 ounce (28.35g)	2	56.7	Day 3	Lunch - 12:00pm	71.4	1.491	15.8	2.722	0	0.414	0.058	0	0.567	0.142	20.4	17.6	0	1.701	0	0	0	0.03	0.013	0.315	3.402	0	3.402	3.402	0.033	0	0.179	0.006	1	A	100	101	3
	Grains, rice, white, long-grain, parboiled, cooked / Grains céréaliers, riz blanc, grain long, étuvé, cuit	1 ounce (28.35g)	1.5	42.53	Day 3	Dinner - 7:00PM	52.3	1.237	11.1	0.383	0.047	0.157	0.031	0	8.08	0.102	3.827	23.8	0.85	0	0	0	0.004	0.031	0.008	0.982	1.276	0	1.276	1.276	0.066	0	0.031	0.007	1	B	100	102	3
	Grains, rice, white, long-grain, regular, cooked / Grains céréaliers, riz blanc, grain long, ordinaire, cuit	100 grams (100g)	1	100	Day 3	Lunch - 2:30	110.6	2.288	24	0.357	0.043	0.238	0.065	0	8.505	0.17	10.2	29.8	0.85	0	0	0	0.034	0.017	0.011	0.34	2.551	0	2.551	2.551	0.079	0	0.053	0.011	1	B	100	102	3
	Pasta, rice noodles, cooked / Pâtes, nouilles de riz, cuites	1 ounce (28.35g)	2	56.7	Day 3	Dinner	61.8	0.516	14.1	0.567	0.017	0.113	0.013	0	2.268	0.079	1.701	2.268	10.8	0	0	0	0.017	0.01	0.002	0.041	1.701	0	1.701	1.701	0.003	0	0.011	0.002	1	B	100	102	3
	Pasta, rice noodles, cooked / Pâtes, nouilles de riz, cuites	1 ounce (28.35g)	2	56.7	Day 3	Dinner - 6:00pm	61.8	0.516	14.1	0.567	0.017	0.113	0.013	0	2.268	0.079	1.701	2.268	10.8	0	0	0	0.017	0.01	0.002	0.041	1.701	0	1.701	1.701	0.003	0	0.011	0.002	1	B	100	102	3
	Pasta, rice noodles, cooked / Pâtes, nouilles de riz, cuites	1 ounce (28.35g)	4	113.4	Day 1	Lunch - 12:00pm	123.6	1.032	28.2	1.134	0.0338801	0.227	0.026	0	4.536	0.159	3.402	4.536	21.5	0	0	0	0.0338801	0.02	0.005	0.082	3.402	0	3.402	3.402	0.007	0	0.022	0.005	1	B	100	102	3
	Rice, white, cooked, glutinous - sticky rice	1 cup, cooked (174g)	2	348	Day 3	Dinner - 5:30pm	337.6	7.03	73.4	3.48	0.174	0.661	0.136	0	6.96	0.487	17.4	34.8	17.4	0	0	0	0.139	0.07	0.045	1.009	3.48	0	3.48	3.48	0.09	0	0.23	0.01	1	B	100	102	3
	Sunrise Gluten Free Cereal - Nature's Path	grams	56.56	56.56	Day 1	Lunch - 4:00pm	39.9	1.995	7.98	1.995	1.995	2.84	0	0	41.07	0.359	16.24	164.64	41.9	37.33	0	0	0	0.129	0.029	0.821	1.12	0	1.12	1.12	0.064	0	0.147	0.024	6	A	100	108	3
	Sunrise Gluten Free Cereal - Nature's Path	grams	56	56	Day 2	Snack 2 - 6:00pm	39.5	1.975	7.901	1.975	1.975	2.84	0	0	41.07	0.356	16.24	164.64	41.5	37.33	0	0	0	0.129	0.029	0.821	1.12	0	1.12	1.12	0.064	0	0.147	0.024	6	A	100	108	3
	Bread - Little Northern Bakehouse Seeds and Grains Gluten Free	grams	144	144	Day 1	Lunch - 12:00pm	100.8	1.44	23	4.32	2.88	4.32	1.2	0	28.8	1.037	115.2	120	172.8	0	0	0	0.936	0.94032	0.432	9.80664	43.2	0	43.2	43.2	0.38496	0	2.38176	0.15264	3	B	100	104	3
	Bakery on Main Gluten Free - Extreme Fruit & Nut Granola	grams	88	88	Day 1	Breakfast - 8:52am	410.7	5.867	52.8	5.867	17.6	20.5	2.933	0	58.7	2.112	109.12	337.92	44	0	0	0	5.1744	0.12848	0.0891733	1.98176	5.28	2.64	5.28	9.68	0.11968	0	1.61333	0.131413	6	A	100	108	4
	Bakery on Main Gluten Free - Extreme Fruit & Nut Granola	grams	88	88	Day 1	Breakfast - 8:52am	410.7	5.867	52.8	5.867	17.6	20.5	2.933	0	58.7	2.112	109.12	337.92	44	0	0	0	5.1744	0.12848	0.0891733	1.98176	5.28	2.64	5.28	9.68	0.11968	0	1.61333	0.131413	6	A	100	108	4
	Bakery on Main - Cranberry Orange Cashew Granola	1/3 cup (100g)	1	100	Day 3	Breakfast - 9:00am	140	2	20	1	8	6	0.5	0	20	0.72	124	384	15	0	0	0	5.88	0.146	0.101333	2.252	6	3	6	11	0.136	0	1.83333	0.149333	6	A	100	108	4
	Bakery on Main - Cranberry Orange Cashew Granola	1/3 cup (100g)	1.5	150	Day 1	Breakfast - 8:30am	210	3	30	1.5	12	9	0.75	0	30	1.08	186	576	22.5	0	0	0	8.82	0.219	0.152	3.378	9	4.5	9	16.5	0.204	0	2.75	0.224	6	A	100	108	4
	Bran, Oat, ckd	1 cup (219g)	0.25	54.75	Day 1	Breakfast - 8:30am	21.9	1.757	6.263	1.424		0.471	0.089	0	5.475	0.482	21.9	50.4	0.548	0	0	0	0.66	0.088	0.019	0.079	3.285	0	3.285	3.285	0.014	0	0.177	0.008	5	A	100	108	4
	Bran, Oat, ckd	1 cup (219g)	0.25	54.75	Day 3	Breakfast - 10:00am	21.9	1.757	6.263	1.424		0.471	0.089	0	5.475	0.482	21.9	50.4	0.548	0	0	0	0.66	0.088	0.019	0.079	3.285	0	3.285	3.285	0.014	0	0.177	0.008	5	A	100	108	4
	Black Bean Crackers with onion and garlic - Breton	4 crackers (16g)	1	16	Day 3	Lunch - 12:30pm	80	2	10	2	1	4	1.6	0	20	0.36	16	136	96	0	0	0	0.16	0.056	0.04	0.752	38	0	38	38	0.024	0	0	0	4	B	100	108	2
	General Mills - Apple Cinnamon Cheerios	grams	57	57	Day 1	Breakfast - 7:00am	228	3.8	45.6	3.8	19	3.8	0.456	0	190	8.55	451.929	142.5	218.5	203.571	11.4	3.05357	0.4275	0.585268	0.610714	7.63393	1.71	0	1.71	68.97	0.814286	1.22143	0.741	0.057	6	A	100	108	4
	Love Grown - Power O's	grams	40	40	Day 1	Breakfast - 6:15am	148.6	6.857	26.3	4.572	2.286	1.714	0	0	22.9	1.646	40	340	114.3	0	1.372	0	0.4	0.14	0.1	1.88	95	0	95	95	0.06	0	0	0	5	A	100	108	4
	Love Grown - Power O's	grams	40	40	Day 2	Breakfast - 8:00am	148.6	6.857	26.3	4.572	2.286	1.714	0	0	22.9	1.646	40	340	114.3	0	1.372	0	0.4	0.14	0.1	1.88	95	0	95	95	0.06	0	0	0	5	A	100	108	4
	Love Grown - Power O's	grams	40	40	Day 3	Breakfast - 8:00am	148.6	6.857	26.3	4.572	2.286	1.714	0	0	22.9	1.646	40	340	114.3	0	1.372	0	0.4	0.14	0.1	1.88	95	0	95	95	0.06	0	0	0	5	A	100	108	4
	Breton - Gluten Free Crackers - White Bean With Salt and Pepper	5 crackers (20g)	1	20	Day 1	Snack 2 - 8:15pm	90	2	12	3	1	4.5	2	0	20	0.72	20	170	120	0	0	0	0.2	0.07	0.05	0.94	47.5	0	47.5	47.5	0.03	0	0	0	4	B	100	106	4
	Breton - Gluten Free Crackers - White Bean With Salt and Pepper	5 crackers (20g)	1	20	Day 3	Lunch - 12:45pm	90	2	12	3	1	4.5	2	0	20	0.72	20	170	120	0	0	0	0.2	0.07	0.05	0.94	47.5	0	47.5	47.5	0.03	0	0	0	4	B	100	106	4
	Betty Crocker - Gluten Free (Gf) Bisquick	1 tbsp (15g)	2.88	43.2	Day 1	Lunch - 2:08pm	74.9	1.07	16.585	0.535	2.88	0.268	0	0	28.8	0	0	0	184.3	0	0	0	0	0	0	0	0	0	0	0	0	0	0	0	140	D	100	107	3
	Bread crumbs, dry, grated, seasoned / Pain, chapelure, séché, émiettée, assaisonnée	1 ounce (28.35g)	0.375	10.63	Day 2	Dinner	40.8	1.502	7.281	0.521	0.61	0.583	0.148	0.106	19.3	0.702	4.89	24.6	187	1.063	0.287	0	0.028	0.07	0.051	0.727	12.7	10.5	2.126	20	0.018	0.004	0.222	0.023	140	C	100	105	3
	Bread crumbs, dry, grated, seasoned / Pain, chapelure, séché, émiettée, assaisonnée	1 ounce (28.35g)	0.375	10.63	Day 3	Dinner	40.8	1.502	7.281	0.521	0.61	0.583	0.148	0.106	19.3	0.702	4.89	24.6	187	1.063	0.287	0	0.028	0.07	0.051	0.727	12.7	10.5	2.126	20	0.018	0.004	0.222	0.023	140	C	100	105	3
	Pasta, egg noodles, unenriched, cooked / Pâtes, nouilles aux oeufs, non enrichies, cuites	grams	150	150	Day 3	Dinner	207	6.81	37.7	1.8	0.6	3.105	0.628	43.5	18	0.9	31.5	57	7.5	9	0	0.15	0.255	0.045	0.03	0.6	10.5	0	10.5	10.5	0.069	0.135	0.783	0.042	130	D	100	101	3
	Pasta, made with egg, homemade, cooked / Pâtes, préparées avec des oeufs, maison, cuites	250ml (169.06g)	1.5	253.59	Day 1	Lunch - 12:30pm	329.7	13.4	59.7	5.554	1.01	4.413	1.035	104	25.4	2.942	35.5	53.3	210.5	43.1	0	0.253	0.4301	0.439	0.441	3.188	109	60.9	48.2	151.6	0.094	0.254	1.164	0.114	130	D	100	101	3
	Grains, buckwheat groats, roasted, cooked / Grains céréaliers, gruau de sarrasin, rôti, cuit	grams	333	333	Day 2	Breakfast - 8:30am	306.4	11.3	66.4	8.991	2.997	2.065	0.446	0	23.3	2.664	169.8	293	13.3	0	0	0	0.3	0.133	0.13	3.13	46.6	0	46.6	46.6	0.256	0	0.579	0.047	160	A	100	103	1
	Grains, buckwheat groats, roasted, cooked / Grains céréaliers, gruau de sarrasin, rôti, cuit	grams	232	232	Day 3	Breakfast - 7:30am	213.4	7.842	46.3	6.264	2.088	1.438	0.311	0	16.2	1.856	118.3	204.2	9.28	0	0	0	0.209	0.093	0.09	2.181	32.5	0	32.5	32.5	0.179	0	0.404	0.032	160	A	100	103	1
	Grains, millet, cooked / Grains céréaliers, millet, cuit	250ml (183.85g)	1	183.85	Day 3	Breakfast - 7:00am	218.8	6.453	43.5	5.387	0.239	1.839	0.316	0	5.516	1.158	80.9	114	3.677	0	0	0	0.037	0.195	0.151	2.445	34.9	0	34.9	34.9	0.199	0	0.883	0.051	160	A	100	103	1
	Grains, quinoa, cooked / Grains céréaliers, quinoa, cuit	grams	95	95	Day 2	Dinner - 6:00pm	114	4.18	20.2	2.66	0	1.824	0.143	0	16.2	1.416	60.8	163.4	6.65	0	0	0	0	0.102	0.104	0.391	39.9	0	39.9	39.9	0.117	0	0.744	0.065	160	A	100	103	1
	Grains, quinoa, cooked / Grains céréaliers, quinoa, cuit	1 ounce (28.35g)	2	56.7	Day 1	Dinner - 7:00pm	68	2.495	12.1	1.588	0	1.089	0.086	0	9.639	0.845	36.3	97.5	3.969	0	0	0	0	0.061	0.062	0.234	23.8	0	23.8	23.8	0.07	0	0.744	0.065	160	A	100	103	1
	Grains, quinoa, dry / Grains céréaliers, quinoa, sec	100 grams (100g)	0.25	25	Day 2	Lunch - 3:00pm	92	3.53	16	1.722	0	1.518	0.176	0	11.8	1.142	49.2	140.8	1.25	0.25	0	0	0	0.09	0.08	0.38	46	0	46	46	0.122	0	0.744	0.065	160	A	100	103	1
	Grains, quinoa, dry / Grains céréaliers, quinoa, sec	100 grams (100g)	0.25	25	Day 3	Lunch - 11:30am	92	3.53	16	1.722	0	1.518	0.176	0	11.8	1.142	49.2	140.8	1.25	0.25	0	0	0	0.09	0.08	0.38	46	0	46	46	0.122	0	0.744	0.065	160	A	100	103	1
	Pancakes, Blueberry, homemade	grams	33	33	Day 2	Lunch - 12:00pm	73.3	2.013	9.57	0.825	1.73313	3.036	0.655	18.5	68	0.568	5.28	45.5	136	16.5	0.726	0	0.342595	0.064	0.09	0.503	11.9	0	11.9	11.9	0.016	0.066	1.208	0.158	170	D	100	107	3
	Pancakes, Blueberry, homemade	grams	41	41	Day 3	Lunch - 1:30pm	91	2.501	11.9	1.025	2.15328	3.772	0.814	23	84.5	0.705	6.56	56.6	168.9	20.5	0.902	0	0.425649	0.08	0.112	0.625	14.8	0	14.8	14.8	0.02	0.082	1.501	0.196	170	D	100	107	3
	Pancakes, Blueberry, homemade	grams	262	262	Day 3	Breakfast - 9:00am	581.6	16	76	6.55	13.76	24.1	5.203	146.7	539.7	4.506	41.9	361.6	1079	131	5.764	0	2.72	0.511	0.713	3.993	94.3	62.9	31.4	138.9	0.128	0.524	9.594	1.252	170	D	100	107	3
	Pancakes, with fruit	grams	250	250	Day 2	Dinner - 6:15pm	472.5	16.5	66.6	5	14.5	15.8	5.065	145	445	2.925	45	445	1040	117.5	4.5	0	0.975	0.438	0.685	2.77	87.5	62.5	25	132.5	0.235	0.9	3.135	0.26	170	D	100	109
	Pasta with vegetables, no sauce or dressing	grams	251	251	Day 3	Lunch - 1:30pm	308.7	11.3	58.4	6.275	3.464	3.263	0.633	0	35.1	2.636	45.2	225.9	609.9	238.4	9.538	0	1.155	0.479	0.299	3.311	138	102.9	35.1	210.8	0.254	0.276	1.17	0.136	130	E	100	109
	Pasta with vegetables, no sauce or dressing	grams	189	189	Day 2	Dinner - 6:00pm	232.5	8.524	43.9	4.725	2.608	2.457	0.476	0	26.5	1.984	34	170.1	459.3	179.6	7.182	0	0.869	0.361	0.225	2.493	104	77.5	26.5	158.8	0.191	0.208	0.881	0.102	130	E	100	109
	Rice casserole with cheese	1 cup (204g)	3	612	Day 1	Dinner - 7:00pm	1095	47.2	138.9	1.836	29.1	37.3	23	122.4	1242	6.426	116.3	1053	2466	459	0	0	0.551	0.82	1.365	6.469	257	220.3	42.8	410	0.416	1.775	1.028	0.496	130	F	100	109
	Rice casserole with cheese	1 cup (204g)	3	612	Day 2	Dinner - 7:30pm	1095	47.2	138.9	1.836	29.1	37.3	23	122.4	1242	6.426	116.3	1053	2466	459	0	0	0.551	0.82	1.365	6.469	257	220.3	42.8	410	0.416	1.775	1.028	0.496	130	F	100	109
	Rice casserole with cheese	1 cup (204g)	1	204	Day 1	Lunch - 2:00pm	365.2	15.7	46.3	0.612	9.71	12.4	7.679	40.8	414.1	2.142	38.8	350.9	822.1	153	0	0	0.184	0.273	0.455	2.156	85.7	73.4	14.3	136.7	0.139	0.592	0.343	0.165	130	F	100	109
	Rice casserole with cheese - risotto	1 cup (204g)	1	204	Day 3	Dinner - 6:00pm	365.2	15.7	46.3	0.612	9.71	12.4	7.679	40.8	414.1	2.142	38.8	350.9	822.1	153	0	0	0.184	0.273	0.455	2.156	85.7	73.4	14.3	136.7	0.139	0.592	0.343	0.165	130	F	100	109
	Macaroni and cheese dinner with dry sauce mix, boxed, prepared with 2% milk and 60% vegetable oil spread	ounces	4.78	135.51	Day 3	Dinner - 6:30pm	257.5	6.627	32.4	1.626	5.786	11.2	2.461	4.065	85.4	1.342	23	174.8	458	9.7	0	0	0.705	0.24	0.241	1.603	94.9	85.4	8.131	154.5	0.083	0.217	2.267	0.27	130	B	100	109
	Pasta or macaroni salad with oil and vinegar-type dressing - made with assorted vegetables	grams	218	218	Day 1	Lunch - 11:09am	307.4	7.172	42.1	3.27	5.581	12.4	1.982	0	30.5	1.853	28.3	215.8	1452	152.6	11.8	0	2.333	0.338	0.187	2.2	21.8	0	21.8	21.8	0.153	0	4.696	0.556	130	E	100	109
	Rice, fried, meatless - vegetable fried rice	grams	100	100	Day 3	Lunch - 12:46pm	151	4.23	21	1	1.1	5.48	0.925	44	20	1.39	17	93	425	24	2.4	0	0.76	0.139	0.085	1.41	50	34	16	74	0.105	0.11	2.436	0.064	130	F	100	109
	Rice, fried, meatless - vegetable fried rice	grams	60	60	Day 2	Dinner - 5:41pm	90.6	2.538	12.6	0.6	0.66	3.288	0.555	26.4	12	0.834	10.2	55.8	255	14.4	1.44	0	0.456	0.083	0.051	0.846	30	20.4	9.6	44.4	0.063	0.066	1.462	0.038	130	F	100	109
	Rice with beans and chicken	1 cup (239g)	0.75	179.25	Day 3	Dinner - 7:00pm	294	18.8	29.1	3.406	0.269	10.9	2.561	50.2	59.2	3.424	48.4	419.4	571.8	132.6	0.538	0	1.183	0.179	0.143	3.924	86	30.5	55.6	109.3	0.212	0.484	2.499	0.217	130	F	100	109
	Rice with beans and chicken	1 cup (239g)	0.5	119.5	Day 1	Dinner - 7:00pm	196	12.5	19.4	2.271	0.179	7.29	1.708	33.5	39.4	2.282	32.3	279.6	381.2	88.4	0.359	0	0.789	0.12	0.096	2.616	57.4	20.3	37	72.9	0.141	0.323	1.666	0.145	130	F	100	109
	Rice with beans and chicken	1 cup (239g)	0.188	44.93	Day 2	Dinner - 6:00pm	73.7	4.709	7.292	0.854	0.067	2.741	0.642	12.6	14.8	0.858	12.1	105.1	143.3	33.2	0.135	0	0.297	0.045	0.036	0.984	21.6	7.638	13.9	27.4	0.053	0.121	0.626	0.054	130	F	100	109
	Rice, fried, with pork	1 cup (198g)	1.5	297	Day 1	Dinner - 7:00pm	501.9	17.9	62.9	2.079	2.109	19.3	4.203	154.4	59.4	3.92	44.6	406.9	896.9	62.4	4.455	0	2.822	0.621	0.297	4.912	29.7	0	29.7	29.7	0.451	0.505	4.933	0.05	130	F	100	109
	Rice, fried, with pork	1 cup (198g)	1	198	Day 2	Dinner - 6:00pm	334.6	11.9	41.9	1.386	1.406	12.9	2.802	103	39.6	2.614	29.7	271.3	598	41.6	2.97	0	1.881	0.414	0.198	3.275	19.8	0	19.8	19.8	0.301	0.337	3.289	0.034	130	F	100	109
	Rice, fried, with pork	1 cup (198g)	1	198	Day 3	Dinner - 7:00pm	334.6	11.9	41.9	1.386	1.406	12.9	2.802	103	39.6	2.614	29.7	271.3	598	41.6	2.97	0	1.881	0.414	0.198	3.275	19.8	0	19.8	19.8	0.301	0.337	3.289	0.034	130	F	100	109
	Annie's - GF White Cheddar Macaroni and Cheese	1 cup (85g)	1	85	Day 2	Lunch - 1:00pm	330	7	62	2	4	5.2	2.5	10	150	0.36	14.4815	110.059	504	6.10741	0	0	0.443889	0.151111	0.151741	1.0093	59.7519	53.7704	5.11952	97.2778	0.3	0.13663	1.42737	0.17	130	B	100	109
	Pasta or macaroni salad with oil and vinegar-type dressing - made with assorted vegetables	grams	218	218	Day 1	Lunch - 11:30am	307.4	7.172	42.1	3.27	5.581	12.4	1.982	0	30.5	1.853	28.3	215.8	1452	152.6	11.8	0	2.333	0.338	0.187	2.2	93.7	0	93.7	93.7	0.153	0	4.696	0.556	130	E	100	109
	Rice, fried, meatless - vegetable fried rice	grams	100	100	Day 3	Lunch - 12:46pm	151	4.23	21	1	1.1	5.48	0.925	44	20	1.39	17	93	425	24	2.4	0	0.76	0.139	0.085	1.41	50	0	50	50	0.105	0.11	2.436	0.064	130	F	100	109
	Rice, fried, meatless - vegetable fried rice	grams	60	60	Day 2	Dinner - 5:41pm	90.6	2.538	12.6	0.6	0.66	3.288	0.555	26.4	12	0.834	10.2	55.8	255	14.4	1.44	0	0.456	0.083	0.051	0.846	30	0	30	30	0.063	0.066	1.462	0.038	130	F	100	109
	Untamed Feast - Morel Coconut Rice	grams	210	210	Day 1	Dinner - 6:00pm	700	22.4	131.6	8.4	8.4	14	8.4	0	224	5.544	35.7	195.3	1190	50.4	5.04	0	1.596	0.2919	0.1785	2.961	105	0	33.6	155.4	0.2205	0.231	0	0.1344	130	F	100	109
	Flavored rice mixture with cheese - Uncle Ben's Country Inn Chicken and Cheese Risotto	grams	275	275	Day 2	Lunch - 12:00pm	236.5	5.252	34.5	0.825	0.66	8.278	2.392	5.5	93.5	2.255	16.5	93.5	464.8	57.8	1.375	0	0.797	0.198	0.058	1.777	68.8	63.2	5.5	115.5	0.091	0.11	1.578	0.151	130	F	100	109
	Flavored rice mixture with cheese - Uncle Ben's Country Inn Chicken and Cheese Risotto	grams	275	275	Day 2	Dinner - 5:15pm	236.5	5.252	34.5	0.825	0.66	8.278	2.392	5.5	93.5	2.255	16.5	93.5	464.8	57.8	1.375	0	0.797	0.198	0.058	1.777	68.8	63.2	5.5	115.5	0.091	0.11	1.578	0.151	130	F	100	109
	Flavored rice mixture with cheese - Uncle Ben's Country Inn Chicken and Cheese Risotto	grams	230	230	Day 3	Lunch - 2:00pm	197.8	4.393	28.8	0.69	0.552	6.923	2.001	4.6	78.2	1.886	13.8	78.2	388.7	48.3	1.15	0	0.667	0.166	0.048	1.486	57.5	52.9	4.6	96.6	0.076	0.092	1.32	0.126	130	F	100	109
	Fit Kitchen - GF Healthy Spag & Balls	1 serving (234g)	1	234	Day 3	Lunch - 3:30PM	490	26	52	2.001	3.999	19	6.999	110	100	19.8	53.82	482.04	270	9.346	9	0	1.755	0.25038	0.39078	4.68	84.24	0	84.24	84.24	0.33462	0.9126	2.46636	0.1989	130	A	100	109
	Milk, evaporated, NS as to fat content (formerly NS as to dilution, used in coffee or tea, assume undiluted)	1 fl oz (31.5g)	1	31.5	Day 2	Breakfast	42.2	2.145	3.163	0	3.163	2.381	1.446	9.135	82.2	0.06	7.56	95.4	33.4	20.5	0.598	0.63	0.044	0.015	0.1	0.061	2.52	0	2.52	2.52	0.016	0.05	0.053	0.025	10	F	120	121
	Milk, fluid, skim / Lait, liquide, écrémé	ounces	8	226.8	Day 3	Breakfast - 5:40am	77.1	7.643	11.2	0	11.5	0.181	0.136	4.536	276.7	0.068	24.9	353.8	95.3	142.7	0	2.26	0.023	0.102	0.413	0.213	11.3	0	11.3	11.3	0.084	1.134	0.006	0.002	10	D	120	121
	Milk, fluid, skim / Lait, liquide, écrémé	ounces	10	283.5	Day 2	Breakfast - 6:00am	96.4	9.554	14.1	0	14.4	0.227	0.17	5.67	345.9	0.085	31.2	442.3	119.1	178.3	0	2.83	0.028	0.128	0.516	0.266	14.2	0	14.2	14.2	0.105	1.418	0.008	0.003	10	D	120	121
	Milk, fluid, skim / Lait, liquide, écrémé	ounces	11	311.85	Day 1	Breakfast - 8:23am	106	10.5	15.5	0	15.9	0.249	0.187	6.237	380.5	0.094	34.3	486.5	131	196.2	0	3.11	0.031	0.14	0.568	0.293	15.6	0	15.6	15.6	0.115	1.559	0.009	0.003	10	D	120	121
	Milk, cow's, fluid, lactose reduced, whole - lactose free	1 cup (244g)	0.5	122	Day 3	Lunch - 12:30pm	73.2	3.928	5.514	0	6.417	3.965	2.275	12.2	137.9	0.037	12.2	174.5	48.8	34.2	0	1.22	0.073	0.054	0.223	0.131	6.1	0	6.1	6.1	0.044	0.537	0.146	0.092	10	A	120	121
	Milk, cow's, fluid, lactose reduced, whole - lactose free	1 cup (244g)	1	244	Day 3	Dinner - 7:00pm	146.4	7.857	11	0	12.8	7.93	4.551	24.4	275.7	0.073	24.4	348.9	97.6	68.3	0	2.44	0.146	0.107	0.447	0.261	12.2	0	12.2	12.2	0.088	1.074	0.293	0.183	10	A	120	121
	Milk, fluid, partly skimmed, 2% M.F. / Lait, partiellement écrémé, liquide, 2% M.G.	250ml (257.82g)	1	257.82	Day 1	Breakfast	128.9	8.508	12.4	0	13	5.105	1.791	20.6	309.4	0.052	28.4	360.9	121.2	162.8	0.516	2.57	0.077	0.101	0.477	0.237	12.9	0	12.9	12.9	0.098	1.366	0.09	0.004	10	B	120	121
	Milk, fluid, partly skimmed, 2% M.F. / Lait, partiellement écrémé, liquide, 2% M.G.	250ml (257.82g)	1	257.82	Day 3	Lunch - 3:00pm	128.9	8.508	12.4	0	13	5.105	1.791	20.6	309.4	0.052	28.4	360.9	121.2	162.8	0.516	2.57	0.077	0.101	0.477	0.237	12.9	0	12.9	12.9	0.098	1.366	0.09	0.004	10	B	120	121
	Milk, fluid, partly skimmed, 2% M.F. / Lait, partiellement écrémé, liquide, 2% M.G.	250ml (257.82g)	1	257.82	Day 3	Lunch - 3:00pm	128.9	8.508	12.4	0	13	5.105	1.791	20.6	309.4	0.052	28.4	360.9	121.2	162.8	0.516	2.57	0.077	0.101	0.477	0.237	12.9	0	12.9	12.9	0.098	1.366	0.09	0.004	10	B	120	121
	Milk, fluid, whole, pasturized, homogenized, 3.3% M.F. / Lait, liquide, entier, homogénéisé, pasteurisé, 3.3% M.G.	250ml (257.82g)	1	257.82	Day 2	Lunch - 12:30pm	157.3	8.121	12.4	0	13.6	8.379	6.244	25.8	291.3	0.077	25.8	340.3	110.9	118.6	0	2.57	0.18	0.119	0.436	0.229	12.9	0	12.9	12.9	0.093	1.16	0.337	0	10	A	120	121
	Milk, evaporated, skim (formerly NS as to dilution, used in coffee or tea)	1 fl oz (32g)	1	32	Day 1	Breakfast - 8:30am	25	2.416	3.632	0	3.632	0.064	0.039	1.28	92.8	0.093	8.64	106.2	36.8	37.8	0.384	0.64	0	0.014	0.099	0.056	2.88	0	2.88	2.88	0.018	0.077	0.001	0.001	10	G	120	121
	Milk, evaporated, skim (formerly NS as to dilution, used in coffee or tea)	1 cup (256g)	0.25	64	Day 2	Breakfast - 9:30am	49.9	4.832	7.264	0	7.264	0.128	0.077	2.56	185.6	0.186	17.3	212.5	73.6	75.5	0.768	1.28	0	0.029	0.198	0.111	5.76	0	5.76	5.76	0.035	0.154	0.003	0.001	10	G	120	121
	Milk, fluid, skim / Lait, liquide, écrémé	1 ounce (28.35g)	0.15	4.25	Day 1	Breakfast - 8:30am	1.446	0.143	0.211	0	0.216	0.003	0.003	0.085	5.188	0.001	0.468	6.634	1.786	2.675	0	1.694	0	0.002	0.008	0.004	0.213	0	0.213	0.213	0.002	0.021	0	0	10	D	120	121
	Milk, fluid, skim / Lait, liquide, écrémé	1 ounce (28.35g)	0.15	4.25	Day 1	Lunch - 1:30pm	1.446	0.143	0.211	0	0.216	0.003	0.003	0.085	5.188	0.001	0.468	6.634	1.786	2.675	0	1.694	0	0.002	0.008	0.004	0.213	0	0.213	0.213	0.002	0.021	0	0	10	D	120	121
	Milk, fluid, skim / Lait, liquide, écrémé	100 grams (100g)	0.25	25	Day 3	Breakfast - 10:00am	8.5	0.842	1.24	0	1.272	0.02	0.015	0.5	30.5	0.008	2.75	39	10.5	15.7	0	0.25	0.002	0.011	0.046	0.024	1.25	0	1.25	1.25	0.009	0.125	0.001	0	10	D	120	121
	Milk, fluid, skim / Lait, liquide, écrémé	100 grams (100g)	0.25	25	Day 3	Breakfast - 10:00am	8.5	0.842	1.24	0	1.272	0.02	0.015	0.5	30.5	0.008	2.75	39	10.5	15.7	0	0.25	0.002	0.011	0.046	0.024	1.25	0	1.25	1.25	0.009	0.125	0.001	0	10	D	120	121
	Milk, cow's, fluid, lactose reduced, nonfat - fat free or skim milk	1 cup (245g)	0.25	61.25	Day 3	Breakfast	20.8	2.064	3.038	0	3.118	0.049	0.031	1.225	76.6	0.018	6.738	95.6	25.7	37.4	0	0.613	0.006	0.028	0.111	0.058	3.062	0	3.062	3.062	0.023	0.325	0.001	0.001	10	D	120	121
	Milk, cow's, fluid, lactose reduced, nonfat - fat free or skim milk	1 fl oz (30.6g)	8	244.8	Day 2	Lunch	83.2	8.25	12.1	0	12.5	0.196	0.125	4.896	306	0.073	26.9	381.9	102.8	149.3	0	2.44	0.024	0.11	0.446	0.23	12.2	0	12.2	12.2	0.091	1.297	0.005	0.002	10	D	120	121
	Milk, fluid, skim / Lait, liquide, écrémé	100 grams (100g)	0.75	75	Day 1	Dinner - 7:00pm	25.5	2.528	3.72	0	3.818	0.06	0.045	1.5	91.5	0.022	8.25	117	31.5	47.2	0	0.75	0.008	0.034	0.136	0.07	3.75	0	3.75	3.75	0.028	0.375	0.002	0.001	10	D	120	121
	Milk, fluid, skim / Lait, liquide, écrémé	100 grams (100g)	0.75	75	Day 3	Breakfast - 9:30am	25.5	2.528	3.72	0	3.818	0.06	0.045	1.5	91.5	0.022	8.25	117	31.5	47.2	0	0.75	0.008	0.034	0.136	0.07	3.75	0	3.75	3.75	0.028	0.375	0.002	0.001	10	D	120	121
	Milk, fluid, partly skimmed, 1% M.F. / Lait, liquide, partiellement écrémé, 1% M.G.	grams	138.44	138.44	Day 1	Lunch - 4:00pm	58.1	4.665	6.908	0	7.199	1.343	0.425	6.922	173	0.042	15.2	207.7	60.9	87.3	0	1.38	0.014	0.028	0.256	0.129	6.922	0	6.922	6.922	0.051	0.651	0	0.006	10	C	120	121
	Milk, fluid, partly skimmed, 1% M.F. / Lait, liquide, partiellement écrémé, 1% M.G.	grams	142	142	Day 2	Snack 2 - 6:00pm	59.6	4.785	7.086	0	7.384	1.377	0.436	7.1	177.5	0.043	15.6	213	62.5	89.6	0	1.42	0.014	0.028	0.263	0.132	7.1	0	7.1	7.1	0.053	0.667	0	0.006	10	C	120	121
	Milk, fluid, skim / Lait, liquide, écrémé	100 grams (100g)	0.75	75	Day 3	Dinner - 6:30pm	25.5	2.528	3.72	0	3.818	0.06	0.045	1.5	91.5	0.022	8.25	117	31.5	47.2	0	0.75	0.008	0.034	0.136	0.07	3.75	0	3.75	3.75	0.028	0.375	0.002	0.001	10	D	120	121
	Milk, fluid, partly skimmed, 1% M.F. / Lait, liquide, partiellement écrémé, 1% M.G.	1 ounce (28.35g)	0.05	1.42	Day 1	Lunch - 11:30am	0.595	0.048	0.071	0	0.074	0.014	0.004	0.071	1.772	0	0.156	2.126	0.624	0.894	0	0.565	0	0	0.003	0.001	0.071	0	0.071	0.071	0.001	0.007	0	0	10	C	120	121
	Milk, fluid, partly skimmed, 1% M.F. / Lait, liquide, partiellement écrémé, 1% M.G.	1 ounce (28.35g)	0.3	8.51	Day 1	Breakfast - 7:30am	3.572	0.287	0.424	0	0.442	0.082	0.026	0.425	10.6	0.003	0.936	12.8	3.742	5.364	0	0.085	0.001	0.002	0.016	0.008	0.425	0	0.425	0.425	0.003	0.04	0	0	10	C	120	121
	Milk, fluid, partly skimmed, 1% M.F. / Lait, liquide, partiellement écrémé, 1% M.G.	1 ounce (28.35g)	0.3	8.51	Day 2	Breakfast - 7:15am	3.572	0.287	0.424	0	0.442	0.082	0.026	0.425	10.6	0.003	0.936	12.8	3.742	5.364	0	0.085	0.001	0.002	0.016	0.008	0.425	0	0.425	0.425	0.003	0.04	0	0	10	C	120	121
	Milk, fluid, partly skimmed, 1% M.F. / Lait, liquide, partiellement écrémé, 1% M.G.	100 grams (100g)	1	100	Day 1	Dinner - 6:20pm	42	3.37	4.99	0	5.2	0.97	0.307	5	125	0.03	11	150	44	63.1	0	1	0.01	0.02	0.185	0.093	5	0	5	5	0.037	0.47	0	0.004	10	C	120	121
	Milk, fluid, partly skimmed, 1% M.F. / Lait, liquide, partiellement écrémé, 1% M.G.	100 grams (100g)	1	100	Day 2	Dinner - 6:30pm	42	3.37	4.99	0	5.2	0.97	0.307	5	125	0.03	11	150	44	63.1	0	1	0.01	0.02	0.185	0.093	5	0	5	5	0.037	0.47	0	0.004	10	C	120	121
	Milk, fluid, partly skimmed, 1% M.F. / Lait, liquide, partiellement écrémé, 1% M.G.	ounces	4.18	118.5	Day 3	Breakfast - 8:30am	49.8	3.994	5.913	0	6.162	1.149	0.363	5.925	148.1	0.036	13	177.8	52.1	74.7	0	1.18	0.012	0.024	0.219	0.11	5.925	0	5.925	5.925	0.044	0.557	0	0.005	10	C	120	121
	Milk, fluid, partly skimmed, 2% M.F. / Lait, partiellement écrémé, liquide, 2% M.G.	250ml (257.82g)	0.5	128.91	Day 2	Snack 1 - 3:00pm	64.5	4.254	6.188	0	6.523	2.552	0.896	10.3	154.7	0.026	14.2	180.5	60.6	81.4	0.258	1.28	0.039	0.05	0.238	0.119	6.445	0	6.445	6.445	0.049	0.683	0.045	0.002	10	B	120	121
	Milk, fluid, partly skimmed, 2% M.F. / Lait, partiellement écrémé, liquide, 2% M.G.	250ml (257.82g)	0.5	128.91	Day 3	Breakfast - 8:00am	64.5	4.254	6.188	0	6.523	2.552	0.896	10.3	154.7	0.026	14.2	180.5	60.6	81.4	0.258	1.28	0.039	0.05	0.238	0.119	6.445	0	6.445	6.445	0.049	0.683	0.045	0.002	10	B	120	121
	Milk, fluid, partly skimmed, 2% M.F. / Lait, partiellement écrémé, liquide, 2% M.G.	250ml (257.82g)	0.6	154.69	Day 1	Breakfast - 8:15am	77.3	5.105	7.425	0	7.827	3.063	1.075	12.4	185.6	0.031	17	216.6	72.7	97.7	0.309	1.54	0.046	0.06	0.286	0.142	7.735	0	7.735	7.735	0.059	0.82	0.054	0.002	10	B	120	121
	Milk, fluid, whole, pasturized, homogenized, 3.3% M.F. / Lait, liquide, entier, homogénéisé, pasteurisé, 3.3% M.G.	250ml (257.82g)	0.5	128.91	Day 2	Snack 1 - 11:15am	78.6	4.061	6.188	0	6.781	4.19	3.122	12.9	145.7	0.039	12.9	170.2	55.4	59.3	0	1.28	0.09	0.059	0.218	0.115	6.445	0	6.445	6.445	0.046	0.58	0.168	0	10	A	120	121
	Milk, fluid, skim / Lait, liquide, écrémé	100 grams (100g)	0.06	6	Day 1	Lunch - 2:08pm	2.04	0.202	0.298	0	0.305	0.005	0.004	0.12	7.32	0.002	0.66	9.36	2.52	3.774	0	2.39	0.001	0.003	0.011	0.006	0.3	0	0.3	0.3	0.002	0.03	0	0	10	D	120	121
	Milk, fluid, partly skimmed, 2% M.F. / Lait, partiellement écrémé, liquide, 2% M.G.	250ml (257.82g)	0.3	77.35	Day 1	Snack 2 - 3:30pm	38.7	2.552	3.713	0	3.914	1.531	0.537	6.188	92.8	0.015	8.508	108.3	36.4	48.8	0.155	0.77	0.023	0.03	0.143	0.071	3.867	0	3.867	3.867	0.029	0.41	0.027	0.001	10	B	120	121
	Milk, fluid, partly skimmed, 1% M.F. / Lait, liquide, partiellement écrémé, 1% M.G.	1 ounce (28.35g)	3	85.05	Day 1	Breakfast - 11:00am	35.7	2.866	4.244	0	4.423	0.825	0.261	4.252	106.3	0.026	9.356	127.6	37.4	53.6	0	0.85	0.009	0.017	0.157	0.079	4.252	0	4.252	4.252	0.031	0.4	0	0.003	10	C	120	121
	Milk, fluid, partly skimmed, 1% M.F. / Lait, liquide, partiellement écrémé, 1% M.G.	1 ounce (28.35g)	3	85.05	Day 2	Breakfast	35.7	2.866	4.244	0	4.423	0.825	0.261	4.252	106.3	0.026	9.356	127.6	37.4	53.6	0	0.85	0.009	0.017	0.157	0.079	4.252	0	4.252	4.252	0.031	0.4	0	0.003	10	C	120	121
	Milk, fluid, partly skimmed, 1% M.F. / Lait, liquide, partiellement écrémé, 1% M.G.	1 ounce (28.35g)	3	85.05	Day 3	Lunch - 11:30am	35.7	2.866	4.244	0	4.423	0.825	0.261	4.252	106.3	0.026	9.356	127.6	37.4	53.6	0	0.85	0.009	0.017	0.157	0.079	4.252	0	4.252	4.252	0.031	0.4	0	0.003	10	C	120	121
	Milk, fluid, partly skimmed, 2% M.F. / Lait, partiellement écrémé, liquide, 2% M.G.	grams	30	30	Day 3	Dinner	15	0.99	1.44	0	1.518	0.594	0.208	2.4	36	0.006	3.3	42	14.1	18.9	0.06	0.3	0.009	0.012	0.056	0.028	1.5	0	1.5	1.5	0.011	0.159	0.01	0	10	B	120	121
	Milk, cow's, fluid, lactose reduced, 2% fat - Lactaid	1 cup (244g)	0.75	183	Day 3	Snack 2 - 9:00pm	91.5	6.039	8.564	0	9.26	3.605	2.3	14.6	214.1	0.055	20.1	274.5	75	100.6	0.366	1.83	0.055	0.071	0.339	0.168	9.15	0	9.15	9.15	0.07	0.842	0.113	0.015	10	B	120	121
	Milk, fluid, partly skimmed, 1% M.F. / Lait, liquide, partiellement écrémé, 1% M.G.	1 ounce (28.35g)	1.5	42.53	Day 2	Dinner	17.9	1.433	2.122	0	2.211	0.412	0.13	2.126	53.2	0.013	4.678	63.8	18.7	26.8	0	0.42	0.004	0.009	0.079	0.04	2.126	0	2.126	2.126	0.016	0.2	0	0.002	10	C	120	121
	Milk, fluid, partly skimmed, 1% M.F. / Lait, liquide, partiellement écrémé, 1% M.G.	100 grams (100g)	1	100	Day 2	Breakfast - 6:30am	42	3.37	4.99	0	5.2	0.97	0.307	5	125	0.03	11	150	44	63.1	0	1	0.01	0.02	0.185	0.093	5	0	5	5	0.037	0.47	0	0.004	10	C	120	121
	Milk, fluid, partly skimmed, 1% M.F. / Lait, liquide, partiellement écrémé, 1% M.G.	100 grams (100g)	1	100	Day 3	Breakfast - 6:30am	42	3.37	4.99	0	5.2	0.97	0.307	5	125	0.03	11	150	44	63.1	0	1	0.01	0.02	0.185	0.093	5	0	5	5	0.037	0.47	0	0.004	10	C	120	121
	Milk, fluid, partly skimmed, 1% M.F. / Lait, liquide, partiellement écrémé, 1% M.G.	100 grams (100g)	1	100	Day 3	Dinner - 6:45pm	42	3.37	4.99	0	5.2	0.97	0.307	5	125	0.03	11	150	44	63.1	0	1	0.01	0.02	0.185	0.093	5	0	5	5	0.037	0.47	0	0.004	10	C	120	121
	Milk, fluid, skim / Lait, liquide, écrémé	1 ounce (28.35g)	1.5	42.53	Day 1	Dinner - 7:30pm	14.5	1.433	2.109	0	2.165	0.034	0.026	0.85	51.9	0.013	4.678	66.3	17.9	26.8	0	0.42	0.004	0.019	0.077	0.04	2.126	0	2.126	2.126	0.016	0.213	0.001	0	10	D	120	121
	Milk, fluid, skim / Lait, liquide, écrémé	100 grams (100g)	1	100	Day 1	Breakfast - 6:30am	34	3.37	4.96	0	5.09	0.08	0.06	2	122	0.03	11	156	42	62.9	0	1	0.01	0.045	0.182	0.094	5	0	5	5	0.037	0.5	0.003	0.001	10	D	120	121
	Milk, fluid, partly skimmed, 1% M.F. / Lait, liquide, partiellement écrémé, 1% M.G.	1 ounce (28.35g)	0.075	2.13	Day 3	Breakfast - 11:00am	0.893	0.072	0.106	0	0.111	0.021	0.007	0.106	2.658	0.001	0.234	3.189	0.936	1.341	0	0.847	0	0	0.004	0.002	0.106	0	0.106	0.106	0.001	0.01	0	0	10	C	120	121
	Lucerne - Skim Milk	1 cup (244g)	1	244	Day 3	Breakfast - 10:30am	90	9.001	12	0	11	0.195	0.137	4.88	300	0.073	26.84	410	140	153.72	4.799	2.44	0.0244	0.1098	0.444	0.229	12.2	0	12.2	12.2	0.09	1.22	0.0049	0.0024	10	D	120	121
	Lucerne - Skim Milk	1 cup (244g)	1	244	Day 1	Breakfast - 7:45am	90	9.001	12	0	11	0.195	0.137	4.88	300	0.073	26.84	410	140	153.72	4.799	2.44	0.0244	0.1098	0.444	0.229	12.2	0	12.2	12.2	0.09	1.22	0.0049	0.0024	10	D	120	121
	Lucerne - Skim Milk	1 cup (244g)	1	244	Day 2	Breakfast - 8:30am	90	9.001	12	0	11	0.195	0.137	4.88	300	0.073	26.84	410	140	153.72	4.799	2.44	0.0244	0.1098	0.444	0.229	12.2	0	12.2	12.2	0.09	1.22	0.0049	0.0024	10	D	120	121
	Lucerne - Skim Milk	1 cup (244g)	1	244	Day 3	Breakfast - 6:00am	90	9.001	12	0	11	0.195	0.137	4.88	300	0.073	26.84	410	140	153.72	4.799	2.44	0.0244	0.1098	0.444	0.229	12.2	0	12.2	12.2	0.09	1.22	0.0049	0.0024	10	D	120	121
	Milk, fluid, partly skimmed, 2% M.F. / Lait, partiellement écrémé, liquide, 2% M.G.	250ml (257.82g)	0.3	77.35	Day 3	Lunch - 12:00pm	38.7	2.552	3.713	0	3.914	1.531	0.537	6.188	92.8	0.015	8.508	108.3	36.4	48.8	0.155	0.77	0.023	0.03	0.143	0.071	3.867	0	3.867	3.867	0.029	0.41	0.027	0.001	10	B	120	121
	Milk, fluid, skim / Lait, liquide, écrémé	1 ounce (28.35g)	0.9	25.51	Day 1	Breakfast - 9:00am	8.675	0.86	1.266	0	1.299	0.02	0.015	0.51	31.1	0.008	2.807	39.8	10.7	16.1	0	0.255	0.003	0.011	0.046	0.024	1.276	0	1.276	1.276	0.009	0.128	0.001	0	10	D	120	121
	Milk, fluid, skim / Lait, liquide, écrémé	100 grams (100g)	0.25	25	Day 2	Breakfast - 9:00am	8.5	0.842	1.24	0	1.272	0.02	0.015	0.5	30.5	0.008	2.75	39	10.5	15.7	0	0.24895	0.002	0.011	0.046	0.024	1.25	0	1.25	1.25	0.009	0.125	0.001	0	10	D	120	121
	Milk, fluid, skim / Lait, liquide, écrémé	100 grams (100g)	0.25	25	Day 3	Breakfast - 9:00am	8.5	0.842	1.24	0	1.272	0.02	0.015	0.5	30.5	0.008	2.75	39	10.5	15.7	0	0.24895	0.002	0.011	0.046	0.024	1.25	0	1.25	1.25	0.009	0.125	0.001	0	10	D	120	121
	Milk, fluid, partly skimmed, 1% M.F. / Lait, liquide, partiellement écrémé, 1% M.G.	grams	166	166	Day 3	Snack 2 - 4:12pm	69.7	5.594	8.283	0	8.632	1.61	0.509	8.3	207.5	0.05	18.3	249	73	104.7	0	1.6525	0.017	0.033	0.307	0.154	8.3	0	8.3	8.3	0.061	0.78		0.007	10	C	120	121
	Milk, fluid, partly skimmed, 1% M.F. / Lait, liquide, partiellement écrémé, 1% M.G.	grams	155	155	Day 3	Breakfast - 8:45am	65.1	5.224	7.734	0	8.06	1.504	0.475	7.75	193.8	0.046	17	232.5	68.2	97.8	0	1.5425	0.015	0.031	0.287	0.144	7.75	0	7.75	7.75	0.057	0.728		0.006	10	C	120	121
	Milk, fluid, partly skimmed, 1% M.F. / Lait, liquide, partiellement écrémé, 1% M.G.	grams	112	112	Day 1	Breakfast - 8:52am	47	3.774	5.589	0	5.824	1.086	0.344	5.6	140	0.034	12.3	168	49.3	70.6	0	1.115	0.011	0.022	0.207	0.104	5.6	0	5.6	5.6	0.041	0.526		0.004	10	C	120	121
	Milk, fluid, partly skimmed, 1% M.F. / Lait, liquide, partiellement écrémé, 1% M.G.	grams	110	110	Day 1	Lunch - 11:30am	46.2	3.707	5.489	0	5.72	1.067	0.337	5.5	137.5	0.033	12.1	165	48.4	69.4	0	1.095	0.011	0.022	0.204	0.102	5.5	0	5.5	5.5	0.041	0.517		0.004	10	C	120	121
	Milk, fluid, partly skimmed, 1% M.F. / Lait, liquide, partiellement écrémé, 1% M.G.	1 ounce (28.35g)	0.15	4.25	Day 1	Breakfast - 8:52am	1.786	0.143	0.212	0	0.221	0.041	0.013	0.213	5.316	0.001	0.468	6.379	1.871	2.682	0	0.04235	0	0.001	0.008	0.004	0.213	0	0.213	0.213	0.002	0.02		0	10	C	120	121
	Milk, fluid, partly skimmed, 1% M.F. / Lait, liquide, partiellement écrémé, 1% M.G.	1 ounce (28.35g)	0.15	4.25	Day 3	Breakfast - 9:54am	1.786	0.143	0.212	0	0.221	0.041	0.013	0.213	5.316	0.001	0.468	6.379	1.871	2.682	0	0.04235	0	0.001	0.008	0.004	0.213	0	0.213	0.213	0.002	0.02		0	10	C	120	121
	Milk, fluid, partly skimmed, 1% M.F. / Lait, liquide, partiellement écrémé, 1% M.G.	100 grams (100g)	0.25	25	Day 3	Breakfast - 7:00am	10.5	0.842	1.248	0	1.3	0.242	0.077	1.25	31.2	0.008	2.75	37.5	11	15.8	0	0.24895	0.002	0.005	0.046	0.023	1.25	0	1.25	1.25	0.009	0.118		0.001	10	C	120	121
	Milk, fluid, skim / Lait, liquide, écrémé	100 grams (100g)	0.75	75	Day 1	Breakfast - 9:15am	25.5	2.528	3.72	0	3.818	0.06	0.045	1.5	91.5	0.022	8.25	117	31.5	47.2	0	0.7475	0.008	0.034	0.136	0.07	3.75	0	3.75	3.75	0.028	0.375	0.002	0.001	10	D	120	121
	Milk, fluid, skim / Lait, liquide, écrémé	100 grams (100g)	0.75	75	Day 2	Breakfast - 9:30am	25.5	2.528	3.72	0	3.818	0.06	0.045	1.5	91.5	0.022	8.25	117	31.5	47.2	0	0.7475	0.008	0.034	0.136	0.07	3.75	0	3.75	3.75	0.028	0.375	0.002	0.001	10	D	120	121
	Milk, fluid, skim / Lait, liquide, écrémé	100 grams (100g)	0.75	75	Day 3	Dinner - 6:30pm	25.5	2.528	3.72	0	3.818	0.06	0.045	1.5	91.5	0.022	8.25	117	31.5	47.2	0	0.7475	0.008	0.034	0.136	0.07	3.75	0	3.75	3.75	0.028	0.375	0.002	0.001	10	D	120	121
	Milk, fluid, skim / Lait, liquide, écrémé	100 grams (100g)	0.667	66.7	Day 3	Breakfast - 7:00am	22.7	2.248	3.308	0	3.395	0.053	0.04	1.334	81.4	0.02	7.337	104.1	28	42	0	0.665	0.007	0.03	0.121	0.063	3.335	0	3.335	3.335	0.025	0.334	0.002	0.001	10	D	120	121
	Milk, fluid, partly skimmed, 1% M.F. / Lait, liquide, partiellement écrémé, 1% M.G.	100 grams (100g)	2	200	Day 1	Breakfast - 7:30am	84	6.74	9.98	0	10.4	1.94	0.613	10	250	0.06	22	300	88	126.1	0	1.9925	0.02	0.04	0.37	0.186	10	0	10	10	0.074	0.94		0.008	10	C	120	121
	Milk, fluid, partly skimmed, 1% M.F. / Lait, liquide, partiellement écrémé, 1% M.G.	1 ounce (28.35g)	0.45	12.76	Day 1	Breakfast - 7:30am	5.358	0.43	0.637	0	0.663	0.124	0.039	0.638	15.9	0.004	1.403	19.1	5.613	8.047	0	0.12705	0.001	0.003	0.024	0.012	0.638	0	0.638	0.638	0.005	0.06		0.001	10	C	120	121
	Milk, fluid, partly skimmed, 1% M.F. / Lait, liquide, partiellement écrémé, 1% M.G.	1 ounce (28.35g)	0.05	1.42	Day 2	Snack 1 - 8:30am	0.595	0.048	0.071	0	0.074	0.014	0.004	0.071	1.772	0	0.156	2.126	0.624	0.894	0	0.565	0	0	0.003	0.001	0.071	0	0.071	0.071	0.001	0.007		0	10	C	120	121
	Milk, fluid, partly skimmed, 1% M.F. / Lait, liquide, partiellement écrémé, 1% M.G.	1 ounce (28.35g)	0.05	1.42	Day 2	Snack 2 - 3:00pm	0.595	0.048	0.071	0	0.074	0.014	0.004	0.071	1.772	0	0.156	2.126	0.624	0.894	0	0.565	0	0	0.003	0.001	0.071	0	0.071	0.071	0.001	0.007		0	10	C	120	121
	Milk, fluid, partly skimmed, 1% M.F. / Lait, liquide, partiellement écrémé, 1% M.G.	100 grams (100g)	1	100	Day 1	Dinner	42	3.37	4.99	0	5.2	0.97	0.307	5	125	0.03	11	150	44	63.1	0	0.995	0.01	0.02	0.185	0.093	5	0	5	5	0.037	0.47		0.004	10	C	120	121
	Milk, fluid, partly skimmed, 1% M.F. / Lait, liquide, partiellement écrémé, 1% M.G.	100 grams (100g)	0.25	25	Day 1	Breakfast - 8:30am	10.5	0.842	1.248	0	1.3	0.242	0.077	1.25	31.2	0.008	2.75	37.5	11	15.8	0	0.24895	0.002	0.005	0.046	0.023	1.25	0	1.25	1.25	0.009	0.118		0.001	10	C	120	121
	Milk, fluid, partly skimmed, 1% M.F. / Lait, liquide, partiellement écrémé, 1% M.G.	100 grams (100g)	0.25	25	Day 2	Breakfast - 7:28am	10.5	0.842	1.248	0	1.3	0.242	0.077	1.25	31.2	0.008	2.75	37.5	11	15.8	0	0.24895	0.002	0.005	0.046	0.023	1.25	0	1.25	1.25	0.009	0.118		0.001	10	C	120	121
	Milk, fluid, partly skimmed, 1% M.F. / Lait, liquide, partiellement écrémé, 1% M.G.	100 grams (100g)	0.25	25	Day 3	Breakfast - 7:34am	10.5	0.842	1.248	0	1.3	0.242	0.077	1.25	31.2	0.008	2.75	37.5	11	15.8	0	0.24895	0.002	0.005	0.046	0.023	1.25	0	1.25	1.25	0.009	0.118		0.001	10	C	120	121
	Milk, fluid, partly skimmed, 1% M.F. / Lait, liquide, partiellement écrémé, 1% M.G.	100 grams (100g)	0.125	12.5	Day 1	Breakfast - 8:30am	5.25	0.421	0.624	0	0.65	0.121	0.038	0.625	15.6	0.004	1.375	18.8	5.5	7.884	0	0.124475	0.001	0.002	0.023	0.012	0.625	0	0.625	0.625	0.005	0.059		0	10	C	120	121
	Milk, fluid, partly skimmed, 2% M.F. / Lait, partiellement écrémé, liquide, 2% M.G.	250ml (257.82g)	1.3	335.16	Day 2	Breakfast - 8:00am	167.6	11.1	16.1	0	17	6.636	2.329	26.8	402.2	0.067	36.9	469.2	157.5	211.7	0.67	3.3375	0.101	0.131	0.62	0.308	16.8	0	16.8	16.8	0.127	1.776	0.117	0.005	10	B	120	121
	Milk, fluid, partly skimmed, 2% M.F. / Lait, partiellement écrémé, liquide, 2% M.G.	250ml (257.82g)	1.1	283.6	Day 3	Breakfast - 9:00am	141.8	9.359	13.6	0	14.4	5.615	1.97	22.7	340.3	0.057	31.2	397	133.3	179.1	0.567	2.825	0.085	0.111	0.525	0.261	14.2	0	14.2	14.2	0.108	1.503	0.099	0.005	10	B	120	121
	Milk, fluid, partly skimmed, 2% M.F. / Lait, partiellement écrémé, liquide, 2% M.G.	250ml (257.82g)	1	257	Day 2	Snack 2 - 8:00pm	128.9	8.5	12.375	0	13.05	5.1	1.79125	20.625	309.5	0.0515	28.35	361	121.175	162.825	0.51575	2.5675	0.07725	0.1005	0.477	0.23725	12.9	0	12.9	12.9	0.098	1.3665	0.09	0.00425	10	B	120	121
	Milk, fluid, partly skimmed, 2% M.F. / Lait, partiellement écrémé, liquide, 2% M.G.	250ml (257.82g)	0.4	103.13	Day 1	Snack 2 - 2:30pm	51.6	3.403	4.95	0	5.218	2.042	0.716	8.25	123.8	0.021	11.3	144.4	48.5	65.1	0.206	1.0275	0.031	0.04	0.191	0.095	5.156	0	5.156	5.156	0.039	0.547	0.036	0.002	10	B	120	121
	Milk, fluid, partly skimmed, 2% M.F. / Lait, partiellement écrémé, liquide, 2% M.G.	250ml (257.82g)	0.4	103.13	Day 1	Snack 2 - 2:30pm	51.6	3.403	4.95	0	5.218	2.042	0.716	8.25	123.8	0.021	11.3	144.4	48.5	65.1	0.206	1.0275	0.031	0.04	0.191	0.095	5.156	0	5.156	5.156	0.039	0.547	0.036	0.002	10	B	120	121
	Milk, fluid, partly skimmed, 2% M.F. / Lait, partiellement écrémé, liquide, 2% M.G.	250ml (257.82g)	0.2	51.56	Day 1	Breakfast - 9:00am	25.8	1.702	2.475	0	2.609	1.021	0.358	4.125	61.9	0.01	5.672	72.2	24.2	32.6	0.103	0.5125	0.015	0.02	0.095	0.047	2.578	0	2.578	2.578	0.02	0.273	0.018	0.001	10	B	120	121
	Milk, fluid, partly skimmed, 2% M.F. / Lait, partiellement écrémé, liquide, 2% M.G.	250ml (257.82g)	0.2	51.56	Day 2	Breakfast - 8:00am	25.8	1.702	2.475	0	2.609	1.021	0.358	4.125	61.9	0.01	5.672	72.2	24.2	32.6	0.103	0.5125	0.015	0.02	0.095	0.047	2.578	0	2.578	2.578	0.02	0.273	0.018	0.001	10	B	120	121
	Milk, fluid, partly skimmed, 1% M.F. / Lait, liquide, partiellement écrémé, 1% M.G.	grams	261	261	Day 3	Dinner - 6:00pm	109.6	8.796	13	0	13.6	2.532	0.801	13	326.2	0.078	28.7	391.5	114.8	164.6	0	2.6	0.026	0.052	0.483	0.243	13	0	13	13	0.097	1.227		0.01	10	C	120	121
	Milk, fluid, partly skimmed, 1% M.F. / Lait, liquide, partiellement écrémé, 1% M.G.	grams	250	250	Day 1	Dinner - 5:30pm	105	8.425	12.5	0	13	2.425	0.767	12.5	312.5	0.075	27.5	375	110	157.7	0	2.49	0.025	0.05	0.462	0.232	12.5	0	12.5	12.5	0.092	1.175		0.01	10	C	120	121
	Milk, fluid, partly skimmed, 2% M.F. / Lait, partiellement écrémé, liquide, 2% M.G.	250ml (257.82g)	1.5	386.73	Day 3	Dinner	193.4	12.8	18.6	0	19.6	7.657	2.687	30.9	464.1	0.077	42.5	541.4	181.8	244.2	0.773	3.85	0.116	0.151	0.715	0.356	19.3	0	19.3	19.3	0.147	2.05	0.135	0.006	10	B	120	121
	Milk, fluid, partly skimmed, 2% M.F. / Lait, partiellement écrémé, liquide, 2% M.G.	250ml (257.82g)	1	257.82	Day 1	Breakfast - 10:00am	128.9	8.508	12.4	0	13	5.105	1.791	20.6	309.4	0.052	28.4	360.9	121.2	162.8	0.516	2.5675	0.077	0.101	0.477	0.237	12.9	0	12.9	12.9	0.098	1.366	0.09	0.004	10	B	120	121
	Milk, fluid, skim / Lait, liquide, écrémé	100 grams (100g)	1	100	Day 1	Lunch - 1:00pm	34	3.37	4.96	0	5.09	0.08	0.06	2	122	0.03	11	156	42	62.9	0	0.995	0.01	0.045	0.182	0.094	5	0	5	5	0.037	0.5	0.003	0.001	10	D	120	121
	Milk, fluid, skim / Lait, liquide, écrémé	100 grams (100g)	1	100	Day 2	Lunch - 1:30pm	34	3.37	4.96	0	5.09	0.08	0.06	2	122	0.03	11	156	42	62.9	0	0.995	0.01	0.045	0.182	0.094	5	0	5	5	0.037	0.5	0.003	0.001	10	D	120	121
	Milk, fluid, skim / Lait, liquide, écrémé	100 grams (100g)	0.5	50	Day 1	Breakfast - 8:30am	17	1.685	2.48	0	2.545	0.04	0.03	1	61	0.015	5.5	78	21	31.5	0	0.4975	0.005	0.022	0.091	0.047	2.5	0	2.5	2.5	0.018	0.25	0.001	0	10	D	120	121
	Milk, evaporated, skim (formerly NS as to dilution, used in coffee or tea)	Quantity not specified, if in beverage (16g)	1	16	Day 1	Breakfast - 8:52am	12.5	1.208	1.816	0	1.816	0.032	0.019	0.64	46.4	0.046	4.32	53.1	18.4	18.9	0.192	0.32	0	0.007	0.049	0.028	1.44	0	1.44	1.44	0.009	0.038	0.001	0	10	G	120	121
	Milk, evaporated, skim (formerly NS as to dilution, used in coffee or tea)	Quantity not specified, if in beverage (16g)	1	16	Day 3	Breakfast - 9:54am	12.5	1.208	1.816	0	1.816	0.032	0.019	0.64	46.4	0.046	4.32	53.1	18.4	18.9	0.192	0.32	0	0.007	0.049	0.028	1.44	0	1.44	1.44	0.009	0.038	0.001	0	10	G	120	121
	Milk, fluid, partly skimmed, 1% M.F. / Lait, liquide, partiellement écrémé, 1% M.G.	grams	166	166	Day 3	Snack 2 - 4:12pm	69.7	5.594	8.283	0	8.632	1.61	0.509	8.3	207.5	0.05	18.3	249	73	104.7	0	1.6525	0.017	0.033	0.307	0.154	8.3	0	8.3	8.3	0.061	0.78		0.007	10	C	120	121
	Milk, fluid, partly skimmed, 1% M.F. / Lait, liquide, partiellement écrémé, 1% M.G.	grams	155	155	Day 3	Breakfast - 8:45am	65.1	5.224	7.734	0	8.06	1.504	0.475	7.75	193.8	0.046	17	232.5	68.2	97.8	0	1.5425	0.015	0.031	0.287	0.144	7.75	0	7.75	7.75	0.057	0.728		0.006	10	C	120	121
	Milk, fluid, partly skimmed, 1% M.F. / Lait, liquide, partiellement écrémé, 1% M.G.	grams	112	112	Day 1	Breakfast - 8:52am	47	3.774	5.589	0	5.824	1.086	0.344	5.6	140	0.034	12.3	168	49.3	70.6	0	1.115	0.011	0.022	0.207	0.104	5.6	0	5.6	5.6	0.041	0.526		0.004	10	C	120	121
	Milk, fluid, skim / Lait, liquide, écrémé	100 grams (100g)	1	100	Day 1	Dinner - 6:15pm	34	3.37	4.96	0	5.09	0.08	0.06	2	122	0.03	11	156	42	62.9	0	0.995	0.01	0.045	0.182	0.094	5	0	5	5	0.037	0.5	0.003	0.001	10	D	120	121
	Milk, fluid, skim / Lait, liquide, écrémé	100 grams (100g)	0.75	75	Day 2	Dinner - 6:30pm	25.5	2.528	3.72	0	3.818	0.06	0.045	1.5	91.5	0.022	8.25	117	31.5	47.2	0	0.7475	0.008	0.034	0.136	0.07	3.75	0	3.75	3.75	0.028	0.375	0.002	0.001	10	D	120	121
	Milk, fluid, skim / Lait, liquide, écrémé	100 grams (100g)	0.667	66.7	Day 2	Breakfast - 8:30am	22.7	2.248	3.308	0	3.395	0.053	0.04	1.334	81.4	0.02	7.337	104.1	28	42	0	0.665	0.007	0.03	0.121	0.063	3.335	0	3.335	3.335	0.025	0.334	0.002	0.001	10	D	120	121
	Milk, fluid, partly skimmed, 2% M.F. / Lait, partiellement écrémé, liquide, 2% M.G.	250ml (257.82g)	0.15	38.67	Day 1	Breakfast - 7:30am	19.3	1.276	1.856	0	1.957	0.766	0.269	3.094	46.4	0.008	4.254	54.1	18.2	24.4	0.077	0.385	0.012	0.015	0.072	0.036	1.934	0	1.934	1.934	0.015	0.205	0.013	0.001	10	B	120	121
	Milk, fluid, partly skimmed, 2% M.F. / Lait, partiellement écrémé, liquide, 2% M.G.	250ml (257.82g)	0.15	38.67	Day 2	Breakfast - 6:30am	19.3	1.276	1.856	0	1.957	0.766	0.269	3.094	46.4	0.008	4.254	54.1	18.2	24.4	0.077	0.385	0.012	0.015	0.072	0.036	1.934	0	1.934	1.934	0.015	0.205	0.013	0.001	10	B	120	121
	Milk, fluid, partly skimmed, 2% M.F. / Lait, partiellement écrémé, liquide, 2% M.G.	250ml (257.82g)	0.15	38.67	Day 3	Breakfast - 6:30am	19.3	1.276	1.856	0	1.957	0.766	0.269	3.094	46.4	0.008	4.254	54.1	18.2	24.4	0.077	0.385	0.012	0.015	0.072	0.036	1.934	0	1.934	1.934	0.015	0.205	0.013	0.001	10	B	120	121
	Milk, fluid, partly skimmed, 1% M.F. / Lait, liquide, partiellement écrémé, 1% M.G.	100 grams (100g)	0.313	31.3	Day 3	Breakfast - 8:30am	13.1	1.055	1.562	0	1.628	0.304	0.096	1.565	39.1	0.009	3.443	47	13.8	19.7	0	0.3125	0.003	0.006	0.058	0.029	1.565	0	1.565	1.565	0.012	0.147		0.001	10	C	120	121
	Milk, fluid, partly skimmed, 1% M.F. / Lait, liquide, partiellement écrémé, 1% M.G.	1 ounce (28.35g)	0.3	8.51	Day 1	Breakfast - 8:50am	3.572	0.287	0.424	0	0.442	0.082	0.026	0.425	10.6	0.003	0.936	12.8	3.742	5.364	0	0.0847	0.001	0.002	0.016	0.008	0.425	0	0.425	0.425	0.003	0.04		0	10	C	120	121
	Milk, fluid, partly skimmed, 1% M.F. / Lait, liquide, partiellement écrémé, 1% M.G.	1 ounce (28.35g)	0.3	8.51	Day 2	Breakfast - 8:50am	3.572	0.287	0.424	0	0.442	0.082	0.026	0.425	10.6	0.003	0.936	12.8	3.742	5.364	0	0.0847	0.001	0.002	0.016	0.008	0.425	0	0.425	0.425	0.003	0.04		0	10	C	120	121
	Milk, fluid, partly skimmed, 1% M.F. / Lait, liquide, partiellement écrémé, 1% M.G.	1 ounce (28.35g)	0.15	4.25	Day 1	Lunch - 12:30pm	1.786	0.143	0.212	0	0.221	0.041	0.013	0.213	5.316	0.001	0.468	6.379	1.871	2.682	0	0.04235	0	0.001	0.008	0.004	0.213	0	0.213	0.213	0.002	0.02		0	10	C	120	121
	Milk, fluid, partly skimmed, 1% M.F. / Lait, liquide, partiellement écrémé, 1% M.G.	1 ounce (28.35g)	0.15	4.25	Day 2	Snack 1 - 3:00pm	1.786	0.143	0.212	0	0.221	0.041	0.013	0.213	5.316	0.001	0.468	6.379	1.871	2.682	0	0.04235	0	0.001	0.008	0.004	0.213	0	0.213	0.213	0.002	0.02		0	10	C	120	121
	Milk, fluid, partly skimmed, 2% M.F. / Lait, partiellement écrémé, liquide, 2% M.G.	250ml (257.82g)	0.45	116.02	Day 3	Breakfast - 8:00am	58	3.829	5.569	0	5.871	2.297	0.806	9.281	139.2	0.023	12.8	162.4	54.5	73.3	0.232	1.155	0.035	0.045	0.215	0.107	5.801	0	5.801	5.801	0.044	0.615	0.04	0.002	10	B	120	121
	Milk, fluid, partly skimmed, 2% M.F. / Lait, partiellement écrémé, liquide, 2% M.G.	250ml (257.82g)	0.45	116.02	Day 3	Dinner - 6:15pm	58	3.829	5.569	0	5.871	2.297	0.806	9.281	139.2	0.023	12.8	162.4	54.5	73.3	0.232	1.155	0.035	0.045	0.215	0.107	5.801	0	5.801	5.801	0.044	0.615	0.04	0.002	10	B	120	121
	Milk, fluid, whole, pasturized, homogenized, 3.3% M.F. / Lait, liquide, entier, homogénéisé, pasteurisé, 3.3% M.G.	250ml (257.82g)	0.45	116.02	Day 1	Breakfast - 6:15am	70.8	3.655	5.569	0	6.103	3.771	2.81	11.6	131.1	0.035	11.6	153.1	49.9	53.4	0	1.155	0.081	0.053	0.196	0.103	5.801	0	5.801	5.801	0.042	0.522	0.151	0	10	A	120	121
	Milk, fluid, partly skimmed, 1% M.F. / Lait, liquide, partiellement écrémé, 1% M.G.	1 ounce (28.35g)	1.5	42.53	Day 1	Breakfast - 9:00am	17.9	1.433	2.122	0	2.211	0.412	0.13	2.126	53.2	0.013	4.678	63.8	18.7	26.8	0	0.4225	0.004	0.009	0.079	0.04	2.126	0	2.126	2.126	0.016	0.2		0.002	10	C	120	121
	Milk, fluid, partly skimmed, 2% M.F. / Lait, partiellement écrémé, liquide, 2% M.G.	250ml (257.82g)	1	257.82	Day 2	Breakfast - 9:30AM	128.9	8.508	12.4	0	13	5.105	1.791	20.6	309.4	0.052	28.4	360.9	121.2	162.8	0.516	2.5675	0.077	0.101	0.477	0.237	12.9	0	12.9	12.9	0.098	1.366	0.09	0.004	10	B	120	121
	Milk, fluid, partly skimmed, 2% M.F. / Lait, partiellement écrémé, liquide, 2% M.G.	250ml (257.82g)	1	257.82	Day 3	Breakfast - 7:30AM	128.9	8.508	12.4	0	13	5.105	1.791	20.6	309.4	0.052	28.4	360.9	121.2	162.8	0.516	2.5675	0.077	0.101	0.477	0.237	12.9	0	12.9	12.9	0.098	1.366	0.09	0.004	10	B	120	121
	Silk - Unsweetened Almond Milk	1 cup (240g)	0.625	150	Day 1	Breakfast	18.8	0.625	0	0.312	0	0	0	0	117.2	0.225	10	21.9	100	62.51	15.8	1.563	2.749	0	0.042	0	0	0	0	0	0.0585	0.585	0	0	10	I	120	122
	Silk - Unsweetened Almond Milk	1 cup (240g)	0.188	45.12	Day 3	Breakfast - 6:00am	5.64	0.188	0	0.094	0	0	0	0	35.2	0.068	3.008	6.58	30.1	18.8	4.749	0.47	0.827	0	0.013	0	0	0	0	0	0.0176	0.176	0	0	10	I	120	122
	Silk - Unsweetened Almond Milk	1 cup (240g)	0.188	45.12	Day 1	Breakfast - 1:00pm	5.64	0.188	0	0.094	0	0	0	0	35.2	0.068	3.008	6.58	30.1	18.8	4.749	0.47	0.827	0	0.013	0	0	0	0	0	0.0176	0.176	0	0	10	I	120	122
	Silk - Unsweetened Almond Milk	1 cup (240g)	0.188	45.12	Day 3	Breakfast - 9:30am	5.64	0.188	0	0.094	0	0	0	0	35.2	0.068	3.008	6.58	30.1	18.8	4.749	0.47	0.827	0	0.013	0	0	0	0	0	0.0176	0.176	0	0	10	I	120	122
	Silk - Unsweetened Almond Milk	1 cup (240g)	0.125	30	Day 2	Breakfast - 10:20am	3.75	0.125	0	0.062	0	0	0	0	23.4	0.045	2	4.375	20	12.5	3.158	0.313	0.55	0	0.008	0	0	0	0	0	0.0117	0.117	0	0	10	I	120	122
	Silk - Unsweetened Almond Milk	1 cup (240g)	0.25	60	Day 3	Breakfast - 11:30am	7.5	0.25	0	0.125	0	0	0	0	46.9	0.09	4	8.75	40	25	6.316	0.625	1.1	0	0.017	0	0	0	0	0	0.0234	0.234	0	0	10	I	120	122
	Organic Coconut Beverage (Dairy free) - So Delicious	250mL (224g)	0.33	73.92	Day 2	Breakfast - 5:30am	23.1	0.33	2.97	0.33	2.31	1.65	1.32	0	33.86	0.119	0	15.38	4.95	30.82	0	1.386	0	0	0.115	0	0	0	0	0	0	0.296	0	0	10	I	120	122
	Organic Coconut Beverage (Dairy free) - So Delicious	250mL (224g)	0.33	73.92	Day 3	Breakfast - 5:30am	23.1	0.33	2.97	0.33	2.31	1.65	1.32	0	33.86	0.119	0	15.38	4.95	30.82	0	1.386	0	0	0.115	0	0	0	0	0	0	0.296	0	0	10	I	120	122
	Organic Coconut Beverage (Dairy free) - So Delicious	250mL (224g)	0.68	152.32	Day 1	Breakfast - 6:30am	47.6	0.679	6.12	0.679	4.76	3.4	2.72	0	69.76	0.245	0	31.68	10.2	63.52	0	2.856	0	0	0.238	0	0	0	0	0	0	0.609	0	0	10	I	120	122
	Silk - Unsweetened Almond Milk	1 cup (240g)	0.75	180	Day 1	Breakfast - 8:30am	22.5	0.751	0	0.374	0	0	0	0	140.6	0.27	12	26.2	120	75.006	18.9	1.876	3.299	0	0.05	0	0	0	0	0	0.0702	0.702	0	0	10	I	120	122
	Silk - Unsweetened Almond Milk	1 cup (240g)	1.5	360	Day 3	Lunch - 12:00pm	45	1.501	0	0.749	0	0	0	0	281.2	0.54	24	52.5	240	150.012	37.9	3.751	6.599	0	0.101	0	0	0	0	0	0.1404	1.404	0	0	10	I	120	122
	Silk - Unsweetened Almond Milk	1 cup (240g)	0.625	150	Day 1	Breakfast - 7:15	18.8	0.625	0	0.312	0	0	0	0	117.2	0.225	10	21.9	100	62.505	15.8	1.563	2.749	0	0.042	0	0	0	0	0	0.0585	0.585	0	0	10	I	120	122
	Silk - Unsweetened Almond Milk	grams	121	121	Day 3	Breakfast - 9:00am	15.1	0.505	0	0.252	0	0	0	0	94.5	0.182	8.067	17.6	80.7	50.42	12.7	1.261	2.218	0	0.034	0	0	0	0	0	0.04719	0.4407	0	0	10	I	120	122
	Silk - Unsweetened Almond Milk	grams	113	113	Day 2	Breakfast - 9:00am	14.1	0.471	0	0.235	0	0	0	0	88.3	0.17	7.534	16.5	75.3	47.087	11.9	1.177	2.071	0	0.032	0	0	0	0	0	0.04407	0.4407	0	0	10	I	120	122
	Silk - Unsweetened Almond Milk	grams	100	100	Day 1	Breakfast - 9:30am	12.5	0.417	0	0.208	0	0	0	0	78.1	0.15	6.667	14.6	66.7	41.67	10.5	1.042	1.833	0	0.028	0	0	0	0	0	0.039	0.39	0	0	10	I	120	122
	Silk - Unsweetened Almond Milk	grams	100	100	Day 1	Lunch - 1:30pm	12.5	0.417	0	0.208	0	0	0	0	78.1	0.15	6.667	14.6	66.7	41.67	10.5	1.042	1.833	0	0.028	0	0	0	0	0	0.039	0.39	0	0	10	I	120	122
	Silk - Unsweetened Almond Milk	1 cup (240g)	1	240	Day 1	Breakfast - 9:00am	30	1.001	0	0.499	0	0	0	0	187.5	0.36	16	35	160	100.008	25.3	2.501	4.399	0	0.067	0	0	0	0	0	0.0936	0.936	0	0	10	I	120	122
	Silk - Unsweetened Almond Milk	1 cup (240g)	1	240	Day 2	Breakfast - 8:00am	30	1.001	0	0.499	0	0	0	0	187.5	0.36	16	35	160	100.008	25.3	2.501	4.399	0	0.067	0	0	0	0	0	0.0936	0.936	0	0	10	I	120	122
	Silk - Unsweetened Almond Milk	1 cup (240g)	1	240	Day 2	Breakfast - 8:30am	30	1.001	0	0.499	0	0	0	0	187.5	0.36	16	35	160	100.008	25.3	2.501	4.399	0	0.067	0	0	0	0	0	0.0936	0.936	0	0	10	I	120	122
	Silk - Unsweetened Almond Milk	1 cup (240g)	1	240	Day 3	Breakfast - 8:00am	30	1.001	0	0.499	0	0	0	0	187.5	0.36	16	35	160	100.008	25.3	2.501	4.399	0	0.067	0	0	0	0	0	0.0936	0.936	0	0	10	I	120	122
	Silk - Unsweetened Almond Milk	grams	190	190	Day 1	Breakfast - 8:15am	23.8	0.792	0	0.395	0	0	0	0	148.4	0.285	12.7	27.7	126.7	79.17	20	1.98	3.483	0	0.053	0	0	0	0	0	0.0741	0.741	0	0	10	I	120	122
	Rice beverage - rice "milk"	1 fl oz (31.5g)	8	252	Day 1	Breakfast - 6:10am	148.7	3.226	28.8	2.268	0.428	2.142	0.287	0	15.1	0.504	55.4	50.4	88.2	0	0	2	0.378	0.096	0.028	1.915	2.52	0	2.52	2.52	0.171	0	0.532	0.018	10	I	120	122
	Rice beverage - rice "milk"	1 fl oz (31.5g)	8	252	Day 2	Breakfast - 7:57am	148.7	3.226	28.8	2.268	0.428	2.142	0.287	0	15.1	0.504	55.4	50.4	88.2	0	0	2	0.378	0.096	0.028	1.915	2.52	0	2.52	2.52	0.171	0	0.532	0.018	10	I	120	122
	Rice beverage - rice "milk"	1 fl oz (31.5g)	8	252	Day 3	Breakfast - 6:08am	148.7	3.226	28.8	2.268	0.428	2.142	0.287	0	15.1	0.504	55.4	50.4	88.2	0	0	2	0.378	0.096	0.028	1.915	2.52	0	2.52	2.52	0.171	0	0.532	0.018	10	I	120	122
	Silk - Unsweetened Almond Milk	1 cup (240g)	0.5	120	Day 3	Lunch - 12:30pm	15	0.5	0	0.25	0	0	0	0	93.8	0.18	8	17.5	80	50.004	12.6	1.25	2.2	0	0.034	0	0	0	0	0	0.0468	0.468	0	0	10	I	120	122
	Silk - Unsweetened Almond Milk	1 cup (240g)	0.288	69.12	Day 2	Breakfast - 6:45am	8.64	0.288	0	0.144	0	0	0	0	54	0.104	4.608	10.1	46.1	28.8	7.276	0.72	1.267	0	0.019	0	0	0	0	0	0.02696	0.2696	0	0	10	I	120	122
	Silk - Unsweetened Almond Milk	1 cup (240g)	1	240	Day 3	Breakfast - 7:00am	30	1.001	0	0.499	0	0	0	0	187.5	0.36	16	35	160	100.008	25.3	2.501	4.399	0	0.067	0	0	0	0	0	0.0936	0.936	0	0	10	I	120	122
	Silk - Unsweetened Almond Milk	grams	20	20	Day 1	Snack 1 - 4:00pm	2.5	0.083	0	0.042	0	0	0	0	15.6	0.03	1.333	2.917	13.3	8.334	2.105	0.208	0.367	0	0.006	0	0	0	0	0	0.078	0.78	0	0	10	I	120	122
	Silk - Unsweetened Almond Milk	grams	20	20	Day 2	Breakfast - 8:30am	2.5	0.083	0	0.042	0	0	0	0	15.6	0.03	1.333	2.917	13.3	8.334	2.105	0.208	0.367	0	0.006	0	0	0	0	0	0.078	0.78	0	0	10	I	120	122
	Silk - Unsweetened Almond Milk	1 cup (240g)	0.125	30	Day 1	Breakfast	3.75	0.125	0	0.062	0	0	0	0	23.4	0.045	2	4.375	20	12.501	3.158	0.313	0.55	0	0.008	0	0	0	0	0	0.0117	0.117	0	0	10	I	120	122
	Silk - Unsweetened Almond Milk	1 cup (240g)	0.063	15.12	Day 3	Breakfast - 9:00am	1.89	0.063	0	0.031	0	0	0	0	11.8	0.023	1.008	2.205	10.1	6.3005	1.592	0.158	0.277	0	0.004	0	0	0	0	0	0.0058968	0.058968	0	0	10	I	120	122
	Silk Pure - Almond Milk Vanilla Sweetened	1 tbsp (15g)	6	90	Day 1	Breakfast - 11:30am	36	0.375158	0	0.187105	6	0	0	0	180	0.135	6.01579	12	60	37.5016	9.47368	0.937895	1.64984	0	0.0251053	0	0	0	0	0	0.0351	0.351	0	0	10	I	120	122
	Silk Pure - Almond Milk Vanilla Sweetened	1 tbsp (15g)	6	90	Day 3	Breakfast - 10:45am	36	0.375158	0	0.187105	6	0	0	0	180	0.135	6.01579	12	60	37.5016	9.47368	0.937895	1.64984	0	0.0251053	0	0	0	0	0	0.0351	0.351	0	0	10	I	120	122
	Thai Kitchen - Coconut Milk	1 fl oz (30g)	8	240	Day 2	Breakfast - 6:15am	360	4.848	6.72	0	3	40	32	0	43.2	1.44	110.4	528	31.2	0	2.4	0	0.312	0.0528	0	1.5288	33.6	0	33.6	33.6	0.0672	0	0.5592	0	10	I	120	122
	Thai Kitchen - Coconut Milk	1 fl oz (30g)	8	240	Day 3	Breakfast	360	4.848	6.72	0	3	40	32	0	43.2	1.44	110.4	528	31.2	0	2.4	0	0.312	0.0528	0	1.5288	33.6	0	33.6	33.6	0.0672	0	0.5592	0	10	I	120	122
	Nuts, coconut milk (liquid from grated meat and water), raw / Noix, lait de noix de coco (liquide de la noix râpée et eau), cru	60ml (30.41g)	2	60.81	Day 1	Breakfast - 8:00am	139.9	1.393	3.369	0.602	2.031	14.5	12.9	0	9.73	0.997	22.5	159.9	9.122	0	1.703	0	0.091	0.016	0	0.462	9.73	0	9.73	9.73	0.02	0	0.159	0	10	I	120	122
	Nuts, coconut milk (liquid from grated meat and water), raw / Noix, lait de noix de coco (liquide de la noix râpée et eau), cru	60ml (30.41g)	2	60.81	Day 1	Lunch - 12:00pm	139.9	1.393	3.369	0.602	2.031	14.5	12.9	0	9.73	0.997	22.5	159.9	9.122	0	1.703	0	0.091	0.016	0	0.462	9.73	0	9.73	9.73	0.02	0	0.159	0	10	I	120	122
	Nuts, coconut milk (liquid from grated meat and water), raw / Noix, lait de noix de coco (liquide de la noix râpée et eau), cru	60ml (30.41g)	2	60.81	Day 2	Breakfast - 6:45am	139.9	1.393	3.369	0.602	2.031	14.5	12.9	0	9.73	0.997	22.5	159.9	9.122	0	1.703	0	0.091	0.016	0	0.462	9.73	0	9.73	9.73	0.02	0	0.159	0	10	I	120	122
	Nuts, coconut milk (liquid from grated meat and water), raw / Noix, lait de noix de coco (liquide de la noix râpée et eau), cru	60ml (30.41g)	2	60.81	Day 3	Breakfast - 6:00am	139.9	1.393	3.369	0.602	2.031	14.5	12.9	0	9.73	0.997	22.5	159.9	9.122	0	1.703	0	0.091	0.016	0	0.462	9.73	0	9.73	9.73	0.02	0	0.159	0	10	I	120	122
	Nuts, coconut milk (liquid from grated meat and water), raw / Noix, lait de noix de coco (liquide de la noix râpée et eau), cru	60ml (30.41g)	0.375	11.4	Day 2	Breakfast - 6:45am	26.2	0.261	0.632	0.113	0.381	2.718	2.41	0	1.824	0.187	4.219	30	1.71	0	0.319	0	0.017	0.003	0	0.087	1.824	0	1.824	1.824	0.004	0	0.03	0	10	I	120	122
	Nuts, coconut milk (liquid from grated meat and water), raw / Noix, lait de noix de coco (liquide de la noix râpée et eau), cru	60ml (30.41g)	0.188	5.72	Day 3	Breakfast - 6:00am	13.1	0.131	0.317	0.057	0.191	1.363	1.208	0	0.915	0.094	2.115	15	0.857	0	0.16	0	0.009	0.001	0	0.043	0.915	0	0.915	0.915	0.002	0	0.015	0	10	I	120	122
	Silk - Unsweetened Almond Milk	1 cup (240g)	0.5	120	Day 2	Breakfast - 8:30am	15	0.5	0	0.25	0	0	0	0	93.8	0.18	8	17.5	80	50.0021	12.6	1.25	2.2	0	0.034	0	0	0	0	0	0.0468	0.468	0	0	10	I	120	122
	Silk Pure - Almond Milk Vanilla Sweetened	grams	372	372	Day 3	Breakfast - 9:30am	148.8	1.55065	0	0.773368	24.8	0	0	0	744	0.558	24.8653	49.6	248	155.007	39.1579	0.0969158	6.81935	0	0.103768	0	0	0	0	0	0.14508	1.4508	0	0	10	I	120	122
	Silk Pure - Almond Milk Vanilla Sweetened	grams	8	8	Day 1	Breakfast - 7:00am	3.2	0.0333474	0	0.0166316	0.533	0	0	0	16	0.012	0.534737	1.067	5.333	3.33347	0.842105	0.0833684	0.146653	0	0.00223158	0	0	0	0	0	0.00312	0.0312	0	0	10	I	120	122
	Almond Dream - Almond Milk, Unsweetened, Original, Enriched	1 cup (253.59g)	1	253.59	Day 1	Breakfast - 8:00am	50	0.999	3	0.999	0.999	4.002	0	0	300.1	0.72	16.8	36.75	135	30	0	3.75	4.5	0	0.0707	0	0	0	0	0	0.09828	1.2	0	0	10	I	120	122
	Almond Dream - Almond Milk, Unsweetened, Original, Enriched	1 cup (253.59g)	1	253.59	Day 2	Breakfast - 8:15am	50	0.999	3	0.999	0.999	4.002	0	0	300.1	0.72	16.8	36.75	135	30	0	3.75	4.5	0	0.0707	0	0	0	0	0	0.09828	1.2	0	0	10	I	120	122
	Almond Dream - Almond Milk, Unsweetened, Original, Enriched	1 cup (253.59g)	1	253.59	Day 3	Breakfast - 8:30am	50	0.999	3	0.999	0.999	4.002	0	0	300.1	0.72	16.8	36.75	135	30	0	3.75	4.5	0	0.0707	0	0	0	0	0	0.09828	1.2	0	0	10	I	120	122
	Almond Fresh - Earths Own - Almond Milk	1 cup (253g)	0.36	91.08	Day 3	Breakfast - 8:30am	21.6	0.36	2.88	0.36	2.52	1.08	0	0	108	0.129	6.15385	13.4615	39.6	3.7037	0	2.5	1.69205	0	0.111111	0	0	0	0	0	0.036	0.444444	0	0	10	I	120	122
	Natura - Original - Organic Fortified Rice Beverage	1 cup (253g)	1	253	Day 1	Breakfast - 6:19am	130	2.001	26	0	10	3.001	0.3	0	300	0	37	50	65	100	54.2	6.75	0.378	0.096	0.3	1.915	2.52	0	2.52	2.52	0.171	1.2	0.532	0.018	10	I	120	122
	Natura - Original - Organic Fortified Rice Beverage	1 cup (253g)	1	253	Day 2	Breakfast - 5:34am	130	2.001	26	0	10	3.001	0.3	0	300	0	37	50	65	100	54.2	6.75	0.378	0.096	0.3	1.915	2.52	0	2.52	2.52	0.171	1.2	0.532	0.018	10	I	120	122
	Almond Fresh - Earths Own - Almond Milk	1 cup (253g)	0.52	131.56	Day 1	Lunch - 1:30pm	31.2	0.52	4.16	0.52	3.64	1.56	0	0	156	0.187	8.88889	19.4444	57.2	5.26316	0	3.55263	2.44407	0	0.157895	0	0	0	0	0	0.052	0.631579	0	0	10	I	120	122
	Almond Fresh - Earths Own - Almond Milk	1 cup (253g)	0.5	126.5	Day 3	Lunch - 12:00pm	30	0.5	4	0.5	3.5	1.5	0	0	150	0.18	8.57143	18.75	55	5.26316	0	3.55263	2.35679	0	0.157895	0	0	0	0	0	0.0501429	0.631579	0	0	10	I	120	122
	Almond Fresh - Earths Own - Almond Milk	1 cup (253g)	0.32	80.96	Day 3	Breakfast - 9:00am	19.2	0.32	2.56	0.32	2.24	0.96	0	0	96	0.115	5.33333	11.6667	35.2	3.33333	0	0.05625	1.46644	0	0.1	0	0	0	0	0	0.0312	0.4	0	0	10	I	120	122
	Nuts, coconut milk (liquid from grated meat and water), raw / Noix, lait de noix de coco (liquide de la noix râpée et eau), cru	60ml (30.41g)	0.473	14.39	Day 3	Dinner - 8:00pm	33.1	0.33	0.797	0.142	0.481	3.431	3.042	0	2.303	0.236	5.325	37.8	2.159	0	0.403	0	0.022	0.004	0	0.109	2.303	0	2.303	2.303	0.005	0	0.038	0	10	I	120	122
	Silk - Unsweetened Almond Milk	1 cup (240g)	1.5	360	Day 3	Dinner - 10:00pm	45	1.501	0	0.749	0	0	0	0	281.2	0.54	24	52.5	240	150.006	37.9	3.75158	6.599	0	0.101	0	0	0	0	0	0.1404	1.404	0	0	10	I	120	122
	Silk - Unsweetened Almond Milk	ounces	2	56.7	Day 2	Breakfast - 10:30am	7.087	0.236	0	0.118	0	0	0	0	44.3	0.085	3.78	8.269	37.8	23.3343	5.968	0.583579	1.039	0	0.016	0	0	0	0	0	0.02184	0.2184	0	0	10	I	120	122
	Silk - Unsweetened Almond Milk	ounces	2	56.7	Day 3	Breakfast - 11:30am	7.087	0.236	0	0.118	0	0	0	0	44.3	0.085	3.78	8.269	37.8	23.3343	5.968	0.583579	1.039	0	0.016	0	0	0	0	0	0.02184	0.2184	0	0	10	I	120	122
	Thai Kitchen - Coconut Milk	1 fl oz (30g)	13.55	406.5	Day 3	Lunch - 2:30pm	609.8	8.2012	11.368	0	5.075	67.8	54.2	0	73.08	2.439	186.76	893.2	52.78	0	4.06	0	0.5278	0.08932	0	2.58622	56.84	0	56.84	56.84	0.11368	0	0.94598	0	10	I	120	122
	Silk - Unsweetened Almond Milk	1 cup (240g)	1	240	Day 2	Breakfast - 6:30am	30	1.001	0	0.499	0	0	0	0	187.5	0.36	16	35	160	100.004	25.3	2.50105	4.399	0	0.067	0	0	0	0	0	0.0936	0.936	0	0	10	I	120	122
	Silk - Unsweetened Almond Milk	1 cup (240g)	1	240	Day 2	Breakfast - 8:30am	30	1.001	0	0.499	0	0	0	0	187.5	0.36	16	35	160	100.004	25.3	2.50105	4.399	0	0.067	0	0	0	0	0	0.0936	0.936	0	0	10	I	120	122
	Silk - Unsweetened Almond Milk	grams	100	100	Day 1	Breakfast - 9:00am	12.5	0.417	0	0.208	0	0	0	0	78.1	0.15	6.667	14.6	66.7	41.6684	10.5	1.04211	1.833	0	0.028	0	0	0	0	0	0.039	0.39	0	0	10	I	120	122
	Silk - Unsweetened Almond Milk	grams	69	69	Day 3	Breakfast - 8:00am	8.625	0.288	0	0.144	0	0	0	0	53.9	0.104	4.6	10.1	46	28.7512	7.263	0.719053	1.265	0	0.019	0	0	0	0	0	0.02691	0.2691	0	0	10	I	120	122
	Almond Fresh - Earths Own - Almond Milk	grams	245	245	Day 1	Breakfast - 6:15am	58.1	0.968	7.747	0.968	6.779	2.906	0	0	290.5	0.348	16.2688	35.5879	106.5	29.0514	0	3.63142	4.35771	0	0.0684644	0	0	0	0	0	0.0951723	1.16206	0	0	10	I	120	122
	Almond Fresh - Earths Own - Almond Milk	grams	245	245	Day 2	Breakfast - 8:00am	58.1	0.968	7.747	0.968	6.779	2.906	0	0	290.5	0.348	16.2688	35.5879	106.5	29.0514	0	3.63142	4.35771	0	0.0684644	0	0	0	0	0	0.0951723	1.16206	0	0	10	I	120	122
	Almond Fresh - Earths Own - Almond Milk	grams	212	212	Day 3	Breakfast - 8:00am	50.3	0.837	6.703	0.837	5.866	2.514	0	0	251.4	0.301	14.0775	30.7945	92.2	25.1383	0	3.14229	3.77075	0	0.0592427	0	0	0	0	0	0.0823532	1.00553	0	0	10	I	120	122
	Almond Fresh - Earths Own - Almond Milk	grams	65	65	Day 3	Dinner - 6:15pm	15.4	0.257	2.055	0.257	1.799	0.771	0	0	77.1	0.092	4.31621	9.4417	28.3	7.70751	0	0.963439	1.15613	0	0.018164	0	0	0	0	0	0.0252498	0.3083	0	0	10	I	120	122
	Natura - Original - Organic Fortified Rice Beverage	1 cup (253g)	1	253	Day 1	Breakfast - 6:10am	130	2.001	26	0	10	3.001	0.3	0	300	0	37	50	65	100	54.2	6.75	0.378	0.096	0.3	1.915	2.52	0	2.52	2.52	0.171	1.2	0.532	0.018	10	I	120	122
	Natura - Original - Organic Fortified Rice Beverage	1 cup (253g)	1	253	Day 3	Breakfast - 8:46am	130	2.001	26	0	10	3.001	0.3	0	300	0	37	50	65	100	54.2	6.75	0.378	0.096	0.3	1.915	2.52	0	2.52	2.52	0.171	1.2	0.532	0.018	10	I	120	122
	Natura - Original - Organic Fortified Rice Beverage	1 cup (253g)	0.667	168.75	Day 2	Breakfast - 8:09am	86.7	1.335	17.3	0	6.671	2.001	0.199209	0	200.1	0	24.5692	33.4	43.4	66.4032	36.2	4.48221	0.251004	0.063747	0.199209	1.27162	1.67336	0	1.67336	1.67336	0.113549	0.796838	0.353265	0.0119526	10	I	120	122
	Natura - Original - Organic Fortified Rice Beverage	1 cup (253g)	0.08	20.24	Day 3	Dinner - 6:32pm	10.4	0.16	2.08	0	0.8	0.24	0.0237154	0	24	0	2.9249	4	5.2	7.90514	4.337	0.533597	0.0298814	0.00758893	0.0237154	0.151383	0.199209	0	0.199209	0.199209	0.0135178	0.0948617	0.0420553	0.00142292	10	I	120	122
	Cream, Light Coffee or Table	1 tbsp (15g)	0.333	5	Day 3	Breakfast - 11:00am	9.54	0.148	0.141	0	0.183	0.954	0.508	2.947	4.545	0.002	0.45	6.793	3.596	9.041	0.04	0.055	0.006	0.001	0.009	0.004	0.1	0	0.1	0.1	0.002	0.007	0.033	0.003	13	B	120	123
	Cream, table (coffee), 15% M.F. / Crème, à café (de table), 15% M.G.	ounces	1	28.35	Day 1	Breakfast - 4:00am	45.4	0.806	1.138	0	0.04	4.252	2.647	14.2	28.6	0.016	2.708	35.8	11.5	36	0.231	0.1	0.121	0.01	0.042	0.019	0.567	0	0.567	0.567	0.01	0.079	0.097	0.062	13	B	120	123
	Cream, table (coffee), 15% M.F. / Crème, à café (de table), 15% M.G.	ounces	1	28.35	Day 1	Breakfast - 4:00am	45.4	0.806	1.138	0	0.04	4.252	2.647	14.2	28.6	0.016	2.708	35.8	11.5	36	0.231	0.1	0.121	0.01	0.042	0.019	0.567	0	0.567	0.567	0.01	0.079	0.097	0.062	13	B	120	123
	Cream, table (coffee), 15% M.F. / Crème, à café (de table), 15% M.G.	ounces	1	28.35	Day 3	Breakfast - 7:00am	45.4	0.806	1.138	0	0.04	4.252	2.647	14.2	28.6	0.016	2.708	35.8	11.5	36	0.231	0.1	0.121	0.01	0.042	0.019	0.567	0	0.567	0.567	0.01	0.079	0.097	0.062	13	B	120	123
	Cream, table (coffee), 15% M.F. / Crème, à café (de table), 15% M.G.	ounces	1	28.35	Day 1	Breakfast	45.4	0.806	1.138	0	0.04	4.252	2.647	14.2	28.6	0.016	2.708	35.8	11.5	36	0.231	0.1	0.121	0.01	0.042	0.019	0.567	0	0.567	0.567	0.01	0.079	0.097	0.062	13	B	120	123
	Cream, table (coffee), 15% M.F. / Crème, à café (de table), 15% M.G.	ounces	1	28.35	Day 2	Breakfast - 9:10am	45.4	0.806	1.138	0	0.04	4.252	2.647	14.2	28.6	0.016	2.708	35.8	11.5	36	0.231	0.1	0.121	0.01	0.042	0.019	0.567	0	0.567	0.567	0.01	0.079	0.097	0.062	13	B	120	123
	Cream, table (coffee), 15% M.F. / Crème, à café (de table), 15% M.G.	ounces	1	28.35	Day 3	Breakfast - 11:30am	45.4	0.806	1.138	0	0.04	4.252	2.647	14.2	28.6	0.016	2.708	35.8	11.5	36	0.231	0.1	0.121	0.01	0.042	0.019	0.567	0	0.567	0.567	0.01	0.079	0.097	0.062	13	B	120	123
	10% MF Half and Half Cream - Lucerne - for coffee	1 tbsp (15mL) (15g)	4.16	62.4	Day 1	Breakfast	83.2	2.08	6.6	0	0.0832	5.408	3.952	20.08	83.2	0.0416	8	80	24	60	0.4	0.12	1.664	0.0208	0.09568	0.05408	0	0	0	1.8	0.002496	0.208	0.1456	0.09568	13	C	120	123
	10% MF Half and Half Cream - Lucerne - for coffee	1 tbsp (15mL) (15g)	4.16	62.4	Day 2	Breakfast	83.2	2.08	6.6	0	0.0832	5.408	3.952	20.08	83.2	0.0416	8	80	24	60	0.4	0.12	1.664	0.0208	0.09568	0.05408	0	0	0	1.8	0.002496	0.208	0.1456	0.09568	13	C	120	123
	Cream, table (coffee), 15% M.F. / Crème, à café (de table), 15% M.G.	ounces	1	28.35	Day 3	Lunch - 12:30pm	45.4	0.806	1.138	0	0.04	4.252	2.647	14.2	28.6	0.016	2.708	35.8	11.5	36	0.231	0.1	0.121	0.01	0.042	0.019	0.567	0	0.567	0.567	0.01	0.079	0.097	0.062	13	B	120	123
	Cream, Light Coffee or Table	1 tbsp (15g)	0.66	9.9	Day 1	Breakfast - 9:15am	18.9	0.293	0.279	0	0.363	1.891	1.007	5.841	9.009	0.005	0.891	13.5	7.128	17.9	0.079	0.109	0.012	0.002	0.019	0.009	0.198	0	0.198	0.198	0.004	0.014	0.065	0.006	13	B	120	123
	Cream, Light Coffee or Table	1 tbsp (15g)	0.66	9.9	Day 2	Breakfast - 7:00am	18.9	0.293	0.279	0	0.363	1.891	1.007	5.841	9.009	0.005	0.891	13.5	7.128	17.9	0.079	0.109	0.012	0.002	0.019	0.009	0.198	0	0.198	0.198	0.004	0.014	0.065	0.006	13	B	120	123
	Cream, Light Coffee or Table	1 tbsp (15g)	0.33	4.95	Day 3	Breakfast - 7:30am	9.454	0.147	0.14	0	0.182	0.945	0.504	2.921	4.505	0.002	0.446	6.732	3.564	8.96	0.04	0.054	0.006	0.001	0.009	0.004	0.099	0	0.099	0.099	0.002	0.007	0.032	0.003	13	B	120	123
	Cream, sour, light / Crème sure, légère	grams	35	35	Day 1	Dinner - 4:45pm	48.3	1.225	2.485	0	0.077	3.71	2.31	12.2	49.4	0.024	3.5	74.2	24.8	31.5	0.315	0.07	0.105	0.014	0.042	0.024	3.85	0	3.85	3.85	0.007	0.147	0.084	0.056	13	D	120	123
	Cream, half and half	1 cup (242g)	0.063	15.25	Day 1	Lunch - 12:30pm	19.8	0.451	0.656	0	0.024	1.753	1.091	5.641	16	0.011	1.525	19.8	6.251	14.8	0.137	0	0.05	0.005	0.023	0.012	0.457	0	0.457	0.457	0.006	0.05	0.04	0.025	13	C	120	123
	Cream, Light Coffee or Table	1 tbsp (15g)	2	30	Day 1	Breakfast - 8:30am	57.3	0.888	0.846	0	1.101	5.73	3.053	17.7	27.3	0.015	2.7	40.8	21.6	54.3	0.24	0.33	0.036	0.007	0.057	0.027	0.6	0	0.6	0.6	0.013	0.042	0.196	0.019	13	B	120	123
	Cream, Light Coffee or Table	1 tbsp (15g)	1.5	22.5	Day 2	Breakfast - 9:00am	43	0.666	0.634	0	0.826	4.298	2.29	13.3	20.5	0.011	2.025	30.6	16.2	40.7	0.18	0.248	0.027	0.005	0.043	0.02	0.45	0	0.45	0.45	0.01	0.032	0.147	0.014	13	B	120	123
	Cream, Light Coffee or Table	1 tbsp (15g)	1	15	Day 1	Lunch - 12:30pm	28.6	0.444	0.423	0	0.551	2.865	1.526	8.85	13.6	0.008	1.35	20.4	10.8	27.2	0.12	0.165	0.018	0.003	0.028	0.014	0.3	0	0.3	0.3	0.007	0.021	0.098	0.01	13	B	120	123
	McDonalds - Coffee Cream	0.4 fl oz (11 ml) (11g)	1	11	Day 2	Breakfast - 8:30am	20	0	0	0	0	2	1.5	10	20	0	0	0	15	0	0	0	0	0	0	0	0	0	0	0	0	0	0	0	13	B	120	123
	McDonalds - Coffee Cream	0.4 fl oz (11 ml) (11g)	1	11	Day 3	Snack 1 - 4:00pm	20	0	0	0	0	2	1.5	10	20	0	0	0	15	0	0	0	0	0	0	0	0	0	0	0	0	0	0	0	13	B	120	123
	Cream, light, whipped, unsweetened	1 cup (120g)	0.063	7.56	Day 3	Lunch - 12:01pm	22.1	0.164	0.224	0	0.008	2.337	1.462	8.392	5.216	0.002	0.529	7.333	2.57	21.1	0.045	1.53	0.067	0.002	0.009	0.003	0.302	0	0.302	0.302	0.002	0.015	0.047	0.02	13	A	120	123
	10% MF Half and Half Cream - Lucerne - for coffee	1 tbsp (15mL) (15g)	4.16	62.4			83.2	2.08	6.6	0	0.0832	5.408	16.4403	80.6413	83.2	0.173056	8	80	24	60	0.4	0.12	1.664	0.0208	0.09568	0.05408	0	0	0	1.8	0.002496	0.208	0.1456	0.09568	13	C	120	123
	10% MF Half and Half Cream - Lucerne - for coffee	1 tbsp (15mL) (15g)	4.16	62.4		Breakfast	83.2	2.08	6.6	0	0.0832	5.408	3.952	20.08	83.2	0.0416	8	80	24	60	0.4	0.12	1.664	0.0208	0.09568	0.05408	0	0	0	1.8	0.002496	0.208	0.1456	0.09568	13	C	120	123
	10% MF Half and Half Cream - Lucerne - for coffee	1 tbsp (15mL) (15g)	4.16	62.4		Breakfast	83.2	2.08	6.6	0	0.0832	5.408	3.952	20.08	83.2	0.0416	8	80	24	60	0.4	0.12	1.664	0.0208	0.09568	0.05408	0	0	0	1.8	0.002496	0.208	0.1456	0.09568	13	C	120	123
	10% MF Half and Half Cream - Lucerne - for coffee	1 tbsp (15mL) (15g)	4.16	62.4		Breakfast	83.2	2.08	6.6	0	0.0832	5.408	3.952	20.08	83.2	0.0416	8	80	24	60	0.4	0.12	1.664	0.0208	0.09568	0.05408	0	0	0	1.8	0.002496	0.208	0.1456	0.09568	13	C	120	123
	10% MF Half and Half Cream - Lucerne - for coffee	1 tbsp (15mL) (15g)	4.16	62.4		Breakfast	83.2	2.08	6.6	0	0.0832	5.408	3.952	20.08	83.2	0.0416	8	80	24	60	0.4	0.12	1.664	0.0208	0.09568	0.05408	0	0	0	1.8	0.002496	0.208	0.1456	0.09568	13	C	120	123
	10% MF Half and Half Cream - Lucerne - for coffee	1 tbsp (15mL) (15g)	4.16	62.4		Breakfast	83.2	2.08	6.6	0	0.0832	5.408	3.952	20.08	83.2	0.0416	8	80	24	60	0.4	0.12	1.664	0.0208	0.09568	0.05408	0	0	0	1.8	0.002496	0.208	0.1456	0.09568	13	C	120	123
	Cream, Heavy Whipping	1 cup, fluid (yields 2 cups whipped) (238g)	0.25	59.5	Day 2	Lunch - 1:30pm	202.3	1.69	1.63	0	1.737	21.5	13.7	67.2	39.3	0.06	4.165	56.5	16.1	244.5	0.357	0.952	0.547	0.012	0.112	0.038	2.38	0	2.38	2.38	0.021	0.095	0.77	0.076	13	A	120	123
	10% MF Half and Half Cream - Lucerne - for coffee	1 tbsp (15mL) (15g)	1	15	Day 1	Breakfast - 6:30am	20	0.5	1.5	0	0.02	1.3	0.95	5	20	0.01	2	20	6	15	0.1	0	0.4	0.005	0.023	0.013	0	0	0	0	0.0006	0.05	0.035	0.023	13	C	120	123
	10% MF Half and Half Cream - Lucerne - for coffee	1 tbsp (15mL) (15g)	1	15	Day 1	Dinner - 7:30pm	20	0.5	1.5	0	0.02	1.3	0.95	5	20	0.01	2	20	6	15	0.1	0	0.4	0.005	0.023	0.013	0	0	0	0	0.0006	0.05	0.035	0.023	13	C	120	123
	10% MF Half and Half Cream - Lucerne - for coffee	1 tbsp (15mL) (15g)	1	15	Day 2	Breakfast - 6:30am	20	0.5	1.5	0	0.02	1.3	0.95	5	20	0.01	2	20	6	15	0.1	0	0.4	0.005	0.023	0.013	0	0	0	0	0.0006	0.05	0.035	0.023	13	C	120	123
	10% MF Half and Half Cream - Lucerne - for coffee	1 tbsp (15mL) (15g)	1	15	Day 3	Breakfast - 6:30am	20	0.5	1.5	0	0.02	1.3	0.95	5	20	0.01	2	20	6	15	0.1	0	0.4	0.005	0.023	0.013	0	0	0	0	0.0006	0.05	0.035	0.023	13	C	120	123
	Cream, sour, light / Crème sure, légère	125ml (131g)	1	131	Day 1	Dinner - 7:00pm	180.8	4.585	9.301	0	0.288	13.9	8.646	45.8	184.7	0.092	13.1	277.7	93	117.9	1.179	0.26	0.393	0.052	0.157	0.092	14.4	0	14.4	14.4	0.026	0.55	0.314	0.21	13	D	120	123
	10% MF Half and Half Cream - Lucerne - for coffee	1 tbsp (15mL) (15g)	1	15	Day 1	Breakfast - 9:30am	20	0.5	1.5	0	0.02	1.3	0.95	5	20	0.01	2	20	6	15	0.1	0	0.4	0.005	0.023	0.013	0	0	0	0	0.0006	0.05	0.035	0.023	13	C	120	123
	10% MF Half and Half Cream - Lucerne - for coffee	1 tbsp (15mL) (15g)	1	15	Day 2	Breakfast - 7:15am	20	0.5	1.5	0	0.02	1.3	0.95	5	20	0.01	2	20	6	15	0.1	0	0.4	0.005	0.023	0.013	0	0	0	0	0.0006	0.05	0.035	0.023	13	C	120	123
	10% MF Half and Half Cream - Lucerne - for coffee	1 tbsp (15mL) (15g)	1	15	Day 3	Breakfast - 7:00am	20	0.5	1.5	0	0.02	1.3	0.95	5	20	0.01	2	20	6	15	0.1	0	0.4	0.005	0.023	0.013	0	0	0	0	0.0006	0.05	0.035	0.023	13	C	120	123
	10% MF Half and Half Cream - Lucerne - for coffee	grams	20	20	Day 2	Breakfast - 8:15am	26.6	0.665	1.995	0	0.0266	1.729	1.2635	6.65	26.6	0.0133	2.66	26.6	7.98	19.95	0.133	0	0.532	0.00665	0.03059	0.01729	0	0	0	0	0.000798	0.0665	0.04655	0.03059	13	C	120	123
	10% MF Half and Half Cream - Lucerne - for coffee	1 tbsp (15mL) (15g)	1	15	Day 3	Breakfast - 8:30am	20	0.5	1.5	0	0.02	1.3	0.95	5	20	0.01	2	20	6	15	0.1	0	0.4	0.005	0.023	0.013	0	0	0	0	0.0006	0.05	0.035	0.023	13	C	120	123
	Cream, table (coffee), 15% M.F. / Crème, à café (de table), 15% M.G.	grams	20	20	Day 2	Lunch - 12:30pm	32	0.569	0.803	0	0.028	3	1.868	9.999	20.2	0.011	1.91	25.3	8.11	25.4	0.163	0.0736	0.085	0.007	0.03	0.014	0.4	0	0.4	0.4	0.007	0.056	0.068	0.044	13	B	120	123
	Cream, sour, light / Crème sure, légère	125ml (131g)	1	131	Day 3	Dinner - 7:30pm	180.8	4.585	9.301	0	0.288	13.9	8.646	45.8	184.7	0.092	13.1	277.7	93	117.9	1.179	0.2625	0.393	0.052	0.157	0.092	14.4	0	14.4	14.4	0.026	0.55	0.314	0.21	13	D	120	123
	Cream, table (coffee), 15% M.F. / Crème, à café (de table), 15% M.G.	100ml (101.44g)	0.2	20.29	Day 1	Breakfast - 7:30am	32.5	0.577	0.814	0	0.028	3.043	1.894	10.1	20.5	0.011	1.938	25.6	8.227	25.8	0.165	0.07465	0.087	0.007	0.03	0.014	0.406	0	0.406	0.406	0.007	0.057	0.069	0.044	13	B	120	123
	Cream, table (coffee), 15% M.F. / Crème, à café (de table), 15% M.G.	100ml (101.44g)	0.2	20.29	Day 1	Breakfast - 7:30am	32.5	0.577	0.814	0	0.028	3.043	1.894	10.1	20.5	0.011	1.938	25.6	8.227	25.8	0.165	0.07465	0.087	0.007	0.03	0.014	0.406	0	0.406	0.406	0.007	0.057	0.069	0.044	13	B	120	123
	Cream, table (coffee), 15% M.F. / Crème, à café (de table), 15% M.G.	100ml (101.44g)	0.2	20.29	Day 2	Breakfast - 7:30am	32.5	0.577	0.814	0	0.028	3.043	1.894	10.1	20.5	0.011	1.938	25.6	8.227	25.8	0.165	0.07465	0.087	0.007	0.03	0.014	0.406	0	0.406	0.406	0.007	0.057	0.069	0.044	13	B	120	123
	Cream, table (coffee), 15% M.F. / Crème, à café (de table), 15% M.G.	100ml (101.44g)	0.2	20.29	Day 2	Breakfast - 7:30am	32.5	0.577	0.814	0	0.028	3.043	1.894	10.1	20.5	0.011	1.938	25.6	8.227	25.8	0.165	0.07465	0.087	0.007	0.03	0.014	0.406	0	0.406	0.406	0.007	0.057	0.069	0.044	13	B	120	123
	Cream, table (coffee), 15% M.F. / Crème, à café (de table), 15% M.G.	100ml (101.44g)	0.2	20.29	Day 3	Breakfast - 7:30am	32.5	0.577	0.814	0	0.028	3.043	1.894	10.1	20.5	0.011	1.938	25.6	8.227	25.8	0.165	0.07465	0.087	0.007	0.03	0.014	0.406	0	0.406	0.406	0.007	0.057	0.069	0.044	13	B	120	123
	Cream, table (coffee), 15% M.F. / Crème, à café (de table), 15% M.G.	100ml (101.44g)	0.2	20.29	Day 3	Breakfast - 11:00am	32.5	0.577	0.814	0	0.028	3.043	1.894	10.1	20.5	0.011	1.938	25.6	8.227	25.8	0.165	0.07465	0.087	0.007	0.03	0.014	0.406	0	0.406	0.406	0.007	0.057	0.069	0.044	13	B	120	123
	10% MF Half and Half Cream - Lucerne - for coffee	grams	50	50	Day 1	Breakfast - 9:00am	66	1.65	4.95	0	0.066	4.29	3.135	16.5	66	0.033	6.6	66	19.8	49.5	0.33	0	1.32	0.0165	0.0759	0.0429	0	0	0	0	0.00198	0.165	0.1155	0.0759	13	C	120	123
	10% MF Half and Half Cream - Lucerne - for coffee	grams	50	50	Day 2	Breakfast - 6:00am	66	1.65	4.95	0	0.066	4.29	3.135	16.5	66	0.033	6.6	66	19.8	49.5	0.33	0	1.32	0.0165	0.0759	0.0429	0	0	0	0	0.00198	0.165	0.1155	0.0759	13	C	120	123
	10% MF Half and Half Cream - Lucerne - for coffee	grams	50	50	Day 2	Dinner - 4:00pm	66	1.65	4.95	0	0.066	4.29	3.135	16.5	66	0.033	6.6	66	19.8	49.5	0.33	0	1.32	0.0165	0.0759	0.0429	0	0	0	0	0.00198	0.165	0.1155	0.0759	13	C	120	123
	10% MF Half and Half Cream - Lucerne - for coffee	grams	50	50	Day 3	Breakfast - 6:30am	66	1.65	4.95	0	0.066	4.29	3.135	16.5	66	0.033	6.6	66	19.8	49.5	0.33	0	1.32	0.0165	0.0759	0.0429	0	0	0	0	0.00198	0.165	0.1155	0.0759	13	C	120	123
	Cream, sour, light / Crème sure, légère	grams	28	28	Day 1	Dinner - 6:30pm	38.6	0.98	1.988	0	0.062	2.968	1.848	9.8	39.5	0.02	2.8	59.4	19.9	25.2	0.252	0.056	0.084	0.011	0.034	0.02	3.08	0	3.08	3.08	0.006	0.118	0.067	0.045	13	D	120	123
	10% MF Half and Half Cream - Lucerne - for coffee	1 tbsp (15mL) (15g)	1	15	Day 1	Breakfast - 8:30am	20	0.5	3	0	0.02	1.3	0.95	5	20	0.01	2	20	6	15	0.1	0	0.4	0.005	0.023	0.013	0	0	0	0	0.0006	0.05	0.035	0.023	13	C	120	123
	10% MF Half and Half Cream - Lucerne - for coffee	1 tbsp (15mL) (15g)	1	15	Day 2	Breakfast	20	0.5	3	0	0.02	1.3	0.95	5	20	0.01	2	20	6	15	0.1	0	0.4	0.005	0.023	0.013	0	0	0	0	0.0006	0.05	0.035	0.023	13	C	120	123
	10% MF Half and Half Cream - Lucerne - for coffee	1 tbsp (15mL) (15g)	1	15	Day 3	Breakfast	20	0.5	3	0	0.02	1.3	0.95	5	20	0.01	2	20	6	15	0.1	0	0.4	0.005	0.023	0.013	0	0	0	0	0.0006	0.05	0.035	0.023	13	C	120	123
	10% MF Half and Half Cream - Lucerne - for coffee	1 tbsp (15mL) (15g)	1	15	Day 1	Breakfast - 9:00am	20	0.5	3	0	0.02	1.3	0.95	5	20	0.01	2	20	6	15	0.1	0	0.4	0.005	0.023	0.013	0	0	0	0	0.0006	0.05	0.035	0.023	13	C	120	123
	10% MF Half and Half Cream - Lucerne - for coffee	1 tbsp (15mL) (15g)	1	15	Day 2	Breakfast - 7:00am	20	0.5	3	0	0.02	1.3	0.95	5	20	0.01	2	20	6	15	0.1	0	0.4	0.005	0.023	0.013	0	0	0	0	0.0006	0.05	0.035	0.023	13	C	120	123
	10% MF Half and Half Cream - Lucerne - for coffee	1 tbsp (15mL) (15g)	1	15	Day 3	Breakfast - 7:00am	20	0.5	3	0	0.02	1.3	0.95	5	20	0.01	2	20	6	15	0.1	0	0.4	0.005	0.023	0.013	0	0	0	0	0.0006	0.05	0.035	0.023	13	C	120	123
	Cream, table (coffee), 15% M.F. / Crème, à café (de table), 15% M.G.	100ml (101.44g)	0.2	20.29	Day 3	Breakfast - 7:30am	32.5	0.577	0.814	0	0.028	3.043	1.894	10.1	20.5	0.011	1.938	25.6	8.227	25.8	0.165	0.07465	0.087	0.007	0.03	0.014	0.406	0	0.406	0.406	0.007	0.057	0.069	0.044	13	B	120	123
	Cream, table (coffee), 15% M.F. / Crème, à café (de table), 15% M.G.	100ml (101.44g)	0.15	15.22	Day 2	Breakfast - 8:00am	24.3	0.433	0.611	0	0.021	2.282	1.421	7.607	15.4	0.009	1.453	19.2	6.17	19.3	0.124	0.056	0.065	0.005	0.023	0.01	0.304	0	0.304	0.304	0.005	0.043	0.052	0.033	13	B	120	123
	Cream, table (coffee), 15% M.F. / Crème, à café (de table), 15% M.G.	ounces	1	28.35	Day 1	Breakfast - 6:15am	45.4	0.806	1.138	0	0.04	4.252	2.647	14.2	28.6	0.016	2.708	35.8	11.5	36	0.231	0.104325	0.121	0.01	0.042	0.019	0.567	0	0.567	0.567	0.01	0.079	0.097	0.062	13	B	120	123
	Cream, sour, light / Crème sure, légère	125ml (131g)	0.2	26.2	Day 2	Lunch - 1:00pm	36.2	0.917	1.86	0	0.058	2.777	1.729	9.17	36.9	0.018	2.62	55.5	18.6	23.6	0.236	0.0524	0.079	0.01	0.031	0.018	2.882	0	2.882	2.882	0.005	0.11	0.063	0.042	13	D	120	123
	10% MF Half and Half Cream - Lucerne - for coffee	1 tbsp (15mL) (15g)	1	15	Day 1	Breakfast - 7:30am	20	0.5	3	0	0.02	1.3	0.95	5	20	0.01	2	20	6	15	0.1	0	0.4	0.005	0.023	0.013	0	0	0	0	0.0006	0.05	0.035	0.023	13	C	120	123
	10% MF Half and Half Cream - Lucerne - for coffee	1 tbsp (15mL) (15g)	1	15	Day 1	Lunch - 12:30pm	20	0.5	3	0	0.02	1.3	0.95	5	20	0.01	2	20	6	15	0.1	0	0.4	0.005	0.023	0.013	0	0	0	0	0.0006	0.05	0.035	0.023	13	C	120	123
	10% MF Half and Half Cream - Lucerne - for coffee	1 tbsp (15mL) (15g)	1	15	Day 2	Breakfast - 7:00am	20	0.5	3	0	0.02	1.3	0.95	5	20	0.01	2	20	6	15	0.1	0	0.4	0.005	0.023	0.013	0	0	0	0	0.0006	0.05	0.035	0.023	13	C	120	123
	10% MF Half and Half Cream - Lucerne - for coffee	1 tbsp (15mL) (15g)	1	15	Day 3	Breakfast - 7:30am	20	0.5	3	0	0.02	1.3	0.95	5	20	0.01	2	20	6	15	0.1	0	0.4	0.005	0.023	0.013	0	0	0	0	0.0006	0.05	0.035	0.023	13	C	120	123
	10% MF Half and Half Cream - Lucerne - for coffee	1 tbsp (15mL) (15g)	1	15	Day 3	Lunch - 1:30pm	20	0.5	3	0	0.02	1.3	0.95	5	20	0.01	2	20	6	15	0.1	0	0.4	0.005	0.023	0.013	0	0	0	0	0.0006	0.05	0.035	0.023	13	C	120	123
	10% MF Half and Half Cream - Lucerne - for coffee	1 tbsp (15mL) (15g)	2	30	Day 1	Breakfast - 6:50am	40	1	6	0	0.04	2.6	1.9	10	40	0.02	4	40	12	30	0.2	0	0.8	0.01	0.046	0.026	0	0	0	0	0.0012	0.1	0.07	0.046	13	C	120	123
	10% MF Half and Half Cream - Lucerne - for coffee	1 tbsp (15mL) (15g)	2	30	Day 2	Breakfast - 6:30am	40	1	6	0	0.04	2.6	1.9	10	40	0.02	4	40	12	30	0.2	0	0.8	0.01	0.046	0.026	0	0	0	0	0.0012	0.1	0.07	0.046	13	C	120	123
	10% MF Half and Half Cream - Lucerne - for coffee	1 tbsp (15mL) (15g)	2	30	Day 3	Breakfast - 9:45am	40	1	6	0	0.04	2.6	1.9	10	40	0.02	4	40	12	30	0.2	0	0.8	0.01	0.046	0.026	0	0	0	0	0.0012	0.1	0.07	0.046	13	C	120	123
	Cream, sour, light / Crème sure, légère	grams	70	70	Day 3	Dinner - 8:00PM	96.6	2.45	4.97	0	0.154	7.42	4.62	24.5	98.7	0.049	7	148.4	49.7	63	0.63	0.14	0.21	0.028	0.084	0.049	7.7	0	7.7	7.7	0.014	0.294	0.168	0.112	13	D	120	123
	Cream, sour, light / Crème sure, légère	125ml (131g)	1	131	Day 2	Dinner - 7:30PM	180.8	4.585	9.301	0	0.288	13.9	8.646	45.8	184.7	0.092	13.1	277.7	93	117.9	1.179	0.2625	0.393	0.052	0.157	0.092	14.4	0	14.4	14.4	0.026	0.55	0.314	0.21	13	D	120	123
	Cheese, Cheddar	grams	22	22	Day 2	Breakfast	88.9	5.031	0.68	0	0.106	7.328	4.151	21.8	156.2	0.031	5.94	16.7	143.7	72.6	0	0.132	0.156	0.006	0.094	0.013	5.94	0	5.94	5.94	0.015	0.242	0.258	0.025	14	D	120	124
	Cheese, Mozzarella, part skim - string cheese	grams	21	21	Day 3	Snack 2 - 10:00pm	63.4	5.452	0.804	0	0.126	4.206	2.661	11.3	153.5	0.052	5.46	19.9	110.9	28.8	0	0.105	0.078	0.021	0.069	0.025	2.1	0	2.1	2.1	0.017	0.485	0.093	0.038	14	C	120	124
	MONTERY JACK - Cheese	1 slice (32g)	1	32	Day 2	Lunch - 2:00pm	102.08	6.48	0.214	0	0.158	7.99	4.98	28.2	237.1	0.203	0.72	26.25	171.6	68.95	0	0.175	0.074	0	0.095	0.0329	0	0	0	0	0	0.2555	0	0	14	C	120	124
	Armstrong Old Cheddar Cheese	grams	17	17	Day 2	Dinner - 6:00pm	68	3.967	0	0	0.048	5.667	3.4	14.2	113.3	0.027	4.59	12.92	136	44.71	0	0.034	0.133	0	0.0737	0.006	4.42	0	4.42	4.42	0.008	0.15	0	0	14	D	120	124
	Armstrong Old Cheddar Cheese	grams	49	49	Day 2	Lunch - 11:30am	196	11.4	0	0	0.14	16.3	9.8	40.8	326.7	0.0784	13.23	37.24	392	128.87	0	0.098	0.382	0	0.217	0.019	12.74	0	12.74	12.74	0.024	0.431	0	0	14	D	120	124
	Armstrong Old Cheddar Cheese	grams	55	55	Day 3	Lunch - 11:30am	220	12.8	0	0	0.2	18.3	11	45.8	366.7	0.088	14.85	41.8	440	144.65	0	0.11	0.429	0	0.239	0.021	14.3	0	14.3	14.3	0.027	0.484	0	0	14	D	120	124
	Armstrong Old Cheddar Cheese	grams	90	90	Day 1	Lunch - 2:30pm	360	21	0	0	0.25	30	18	75	600	0.144	24.3	68.4	720	236.7	0	0.18	0.702	0	0.391	0.0351	23.4	0	23.4	23.4	0.044	0.792	0	0	14	D	120	124
	Cheese, parmesan, shredded / Fromage parmesan, râpé en filaments	50g (50g)	2	100	Day 3	Dinner - 6:00pm	415	37.9	3.41	0	0.9	27.3	17.4	72	1253	0.87	51	97	1696	229	0	0.53	0.25	0.041	0.352	0.287	8	0	8	8	0.105	1.4	0.29	0.345	14	D	120	124
	Cheese, Kraft Cheez Whiz Pasteurized Process Cheese Sauce	grams	5.5	5.5	Day 1	Lunch - 12:30pm	15.2	0.66	0.506	0.016	0.368	1.155	0.72	4.125	19.7	0.01	1.59	13.2	90.1	7.315	0.022	0.001	0	0	0.013	0	0	0	0	0	0.009	0.00275	0.022	0.0055	204	A	120	124
	Cheese, Kraft Cheez Whiz Pasteurized Process Cheese Sauce	grams	5.5	5.5	Day 2	Lunch - 3:00pm	15.2	0.66	0.506	0.016	0.368	1.155	0.72	4.125	19.7	0.01	1.59	13.2	90.1	7.315	0.022	0.001	0	0	0.013	0	0	0	0	0	0.009	0.00275	0.022	0.0055	204	A	120	124
	Cheese, goat, semi-soft, (35% to 55% water, 30% M.F.) / Fromage de chèvre, semi-mou, (35% à 55% eau, 30% M.G.)	grams	10	10	Day 2	Dinner - 7:10pm	36.4	2.158	0.254	0	0.254	2.984	2.064	7.9	29.8	0.162	2.9	15.8	51.5	40.7	0	0.055	0.026	0.007	0.068	0.115	0.2	0	0.2	0.2	0.006	0.022	0.071	0	14	D	120	124
	Armstrong Old Cheddar Cheese	grams	45	45	Day 2	Lunch - 2:30pm	180	10.5	0	0	0.1	15	9	37.5	300	0.072	12.15	34.2	360	118.35	0	0.09	0.351	0	0.195	0.018	11.7	0	11.7	11.7	0.022	0.396	0	0	14	D	120	124
	Armstrong Old Cheddar Cheese	grams	10	10	Day 2	Lunch - 12:30pm	40	2.333	0	0	0.3	3.333	2	8.333	66.7	0.016	2.7	7.6	80	26.3	0	0.02	0.078	0	0.043	0.004	2.6	0	2.6	2.6	0.005	0.088	0	0	14	D	120	124
	Armstrong Old Cheddar Cheese	grams	24	24	Day 1	Lunch - 12:45pm	96	5.6	0	0	0	8	4.8	20	160	0.038	6.48	18.24	192	63.12	0	0.048	0.187	0	0.104	0.009	6.24	0	6.24	6.24	0.011	0.211	0	0	14	D	120	124
	Armstrong Old Cheddar Cheese	grams	100	100	Day 1	Dinner	400	23.3	0	0	0.2	33.3	20	83.3	666.7	0.16	27	76	800	263	0	0.2	0.78	0	0.434	0.039	26	0	26	26	0.049	0.88	0	0	14	D	120	124
	Cheese, brie / Fromage brie	grams	10	10	Day 2	Dinner	33.4	2.075	0.045	0	0.045	2.768	1.741	10	18.4	0.05	2	15.2	62.9	17.4	0	0.05	0.024	0.007	0.052	0.038	6.5	0	6.5	6.5	0.024	0.165	0.051	0.031	14	D	120	124
	Cheese, brie / Fromage brie	grams	10	10	Day 3	Dinner	33.4	2.075	0.045	0	0.045	2.768	1.741	10	18.4	0.05	2	15.2	62.9	17.4	0	0.05	0.024	0.007	0.052	0.038	6.5	0	6.5	6.5	0.024	0.165	0.051	0.031	14	D	120	124
	Cheese, cheddar / Fromage cheddar	ounces	2	56.7	Day 3	Dinner	228.5	14.1	0.726	0	0.295	18.8	12	59.5	408.8	0.386	15.9	55.6	352.1	150.3	0	0.094	0.164	0.015	0.213	0.045	10.2	0	10.2	10.2	0.042	0.471	0.327	0.207	14	D	120	124
	Cheese, cream / Fromage à la crème	30ml (29.47g)	1	29.47	Day 3	Lunch	100.8	1.748	1.2	0	0.946	10.1	5.686	32.4	28.9	0.112	2.653	40.7	94.6	107.9	0	0.18	0.085	0.006	0.037	0.043	3.242	0	3.242	3.242	0.01	0.074	0.304	0.051	14	D	120	124
	Cheese, cream / Fromage à la crème	grams	31	31	Day 2	Lunch	106	1.838	1.262	0	0.995	10.6	5.981	34.1	30.4	0.118	2.79	42.8	99.5	113.5	0	0.19	0.09	0.006	0.039	0.045	3.41	0	3.41	3.41	0.011	0.078	0.32	0.054	14	D	120	124
	Cheese, feta / Fromage féta	1 ounce (28.35g)	0.15	4.25	Day 1	Dinner	11.2	0.604	0.174	0	0.174	0.905	0.636	3.785	21	0.028	0.808	2.637	47.5	5.316	0	0.68	0.008	0.007	0.036	0.042	1.361	0	1.361	1.361	0.018	0.072	0.014	0.011	14	C	120	124
	Cheese, Kraft Velveeta Light Reduced Fat Pasteurized Process Cheese Product	grams	25	25	Day 2	Dinner	55.5	4.9	2.95	0	2.125	2.65	1.775	10.5	143.5	0.035	8.25	86.2	396.5	26.25	0.025	0	0	0	0.162	0	0	0	0	0	0.029	0.375	0.0675	0.01725	204	A	120	124
	Cheese, Kraft Velveeta Light Reduced Fat Pasteurized Process Cheese Product	grams	25	25	Day 3	Dinner	55.5	4.9	2.95	0	2.125	2.65	1.775	10.5	143.5	0.035	8.25	86.2	396.5	26.25	0.025	0	0	0	0.162	0	0	0	0	0	0.029	0.375	0.0675	0.01725	204	A	120	124
	Cheese, mozzarella, (52% water, 22.5% M.F.) / Fromage mozzarella, (52% eau, 22.5% M.G.)	grams	116	116	Day 1	Dinner	348	25.7	2.54	0	1.195	25.9	15.3	91.6	585.8	0.51	23.2	88.2	727.3	207.6	0	0.47	0.22	0.035	0.328	0.121	8.12	0	8.12	8.12	0.043	2.645	0.456	0.432	14	C	120	124
	Cheese, parmesan, shredded / Fromage parmesan, râpé en filaments	50g (50g)	0.1	5	Day 1	Dinner	20.8	1.893	0.171	0	0.045	1.367	0.869	3.6	62.6	0.044	2.55	4.85	84.8	11.4	0	0	0.012	0.002	0.018	0.014	0.4	0	0.4	0.4	0.005	0.07	0.014	0.017	14	D	120	124
	Old White Cheddar Cheese - Baldersons	1 ounce (28.35g)	2	56.7	Day 1	Lunch	246	16	0	0	0	20	14	56	380	0	0	0	380	0	0	0.114	0	0	0.247	0.022	0	0	0	0	0.0279	0.501	0	0	14	D	120	124
	Cheese, feta / Fromage féta	ounces	1	28.35	Day 2	Dinner - 5:30pm	74.8	4.029	1.16	0	1.16	6.033	4.237	25.2	139.8	0.184	5.386	17.6	316.4	35.4	0	0.11	0.051	0.044	0.239	0.281	9.072	0	9.072	9.072	0.12	0.479	0.092	0.075	14	C	120	124
	Cheese, feta / Fromage féta	ounces	1	28.35	Day 3	Dinner - 5:45pm	74.8	4.029	1.16	0	1.16	6.033	4.237	25.2	139.8	0.184	5.386	17.6	316.4	35.4	0	0.11	0.051	0.044	0.239	0.281	9.072	0	9.072	9.072	0.12	0.479	0.092	0.075	14	C	120	124
	Cheese, Mexican blend, reduced fat - Kraft Mexican Four Cheese made with 2% Milk	1 cup, shredded (113g)	0.06	6.78	Day 2	Breakfast - 10:00am	19.1	1.674	0.231	0	0.038	1.315	0.785	4.204	77.7	0.009	2.373	6.305	52.6	10.5	0	0.035	0.012	0.002	0.02	0.004	1.356	0	1.356	1.356	0.006	0.113	0.039	0.009	14	C	120	124
	Cheese, Mexican blend, reduced fat - Kraft Mexican Four Cheese made with 2% Milk	1 cup, shredded (113g)	0.06	6.78	Day 3	Breakfast - 6:00am	19.1	1.674	0.231	0	0.038	1.315	0.785	4.204	77.7	0.009	2.373	6.305	52.6	10.5	0	0.035	0.012	0.002	0.02	0.004	1.356	0	1.356	1.356	0.006	0.113	0.039	0.009	14	C	120	124
	Cheese, cheddar / Fromage cheddar	grams	30	30	Day 3	Dinner - 6:30pm	120.9	7.47	0.384	0	0.156	9.942	6.328	31.5	216.3	0.204	8.4	29.4	186.3	79.5	0	0.05	0.087	0.008	0.113	0.024	5.4	0	5.4	5.4	0.022	0.249	0.173	0.11	14	D	120	124
	Cheese, cheddar / Fromage cheddar	grams	41	41	Day 1	Dinner - 6:00pm	165.2	10.2	0.525	0	0.213	13.6	8.648	43	295.6	0.279	11.5	40.2	254.6	108.6	0	0.0675	0.119	0.011	0.154	0.033	7.38	0	7.38	7.38	0.03	0.34	0.237	0.15	14	D	120	124
	Cheese, cheddar / Fromage cheddar	ounces	0.8	22.68	Day 2	Dinner - 6:00pm	91.4	5.647	0.29	0	0.118	7.516	4.784	23.8	163.5	0.154	6.35	22.2	140.8	60.1	0	0.0375	0.066	0.006	0.085	0.018	4.082	0	4.082	4.082	0.017	0.188	0.131	0.083	14	D	120	124
	Cheese, goat, soft, (more than 55% water, 21% M.F.) / Fromage de chèvre, mou, (plus de 55% eau, 21% M.G.)	grams	60	60	Day 3	Lunch - 12:00pm	160.8	11.1	0.534	0	0.534	12.6	8.745	27.6	84	1.14	9.6	15.6	220.8	172.8	0	0.23	0.108	0.042	0.228	0.258	7.2	0	7.2	7.2	0.15	0.114	0.301	0	14	D	120	124
	Parmesan cheese topping, fat free - Kraft Free Nonfat Grated Topping	1 tablespoon (7.5g)	0.33	2.48	Day 2	Dinner - 6:00pm	9.158	0.99	0.99	0	0.037	0.124	0.077	0.495	19.8	0.124	0.99	14.9	28.5	0.99	0	0.0099	0.001	0.001	0.001	0.005	0.619	0	0.619	0.619	0.002	0.027	0.003	0.002	14	B	120	124
	Cheese - Mini Babybell	1 serving (20g)	2	40	Day 1	Lunch - 1:00pm	78	10	0	0	0	12	2	30	330	0	12	38	280	80	0	0	0	0	0.1556	0	0	0	0	0	0.0304	0.616	0.167	0.0988	14	D	120	124
	Cheese - Mini Babybell	1 serving (20g)	2	40	Day 3	Dinner - 6:30pm	78	10	0	0	0	12	2	30	330	0	12	38	280	80	0	0	0	0	0.1556	0	0	0	0	0	0.0304	0.616	0.167	0.0988	14	D	120	124
	Cheese - Mini Babybell	1 serving (20g)	1	20	Day 2	Breakfast - 9:30am	39	5	0	0	0	6	1	15	165	0	6	19	140	40	0	0	0	0	0.0778	0	0	0	0	0	0.0152	0.308	0.084	0.0494	14	D	120	124
	Cheese, blue / Fromage bleu	20g (37100g)	2	40	Day 2	Lunch - 2:00pm	141.2	8.56011	0.935849	0	0.2	11.496	7.46739	30	211.2	0.123989	9.2	102.4	558	79.2	0	0.21	0.1	0.0115903	0.152776	0.406415	14.4	0	14.4	14.4	0.0664151	0.487978	0.214394	0.105606	14	D	120	124
	Cheese, parmesan, hard / Fromage parmesan, pâte dure	15g (15g)	2	30	Day 2	Lunch - 2:00pm	117.6	10.7	0.966	0	0.24	7.749	4.923	20.4	355.2	0.246	13.2	27.6	480.6	62.1	0	0.14	0.066	0.012	0.1	0.081	2.1	0	2.1	2.1	0.027	0.36	0.082	0.089	14	D	120	124
	Old White Cheddar Cheese - Baldersons	grams	21	21	Day 2	Snack 1 - 7:30pm	91.1	5.926	0	0	0	7.407	5.185	20.7	140.7	0	0	0	140.7	0	0	0.04	0	0	0.068	0.0078	0	0	0	0	0.0098	0.176	0	0	14	D	120	124
	Parmesan cheese topping, fat free - Kraft Free Nonfat Grated Topping	1 tablespoon (7.5g)	1	7.5	Day 1	Lunch - 12:30pm	27.8	3	3	0	0.113	0.375	0.233	1.5	60	0.375	3	45	86.2	3	0	0.03	0.003	0.004	0.004	0.015	1.875	0	1.875	1.875	0.008	0.082	0.008	0.005	14	B	120	124
	Parmesan cheese topping, fat free - Kraft Free Nonfat Grated Topping	1 tablespoon (7.5g)	2	15	Day 2	Lunch - 12:30pm	55.5	6	6	0	0.225	0.75	0.466	3	120	0.75	6	90	172.5	6	0	0.06	0.006	0.008	0.008	0.03	3.75	0	3.75	3.75	0.015	0.165	0.017	0.011	14	B	120	124
	Cheese - Laughing Cow	1 serving (21g)	2	42	Day 2	Lunch - 12:15pm	70	4	2.54	0	2	4	0.42	10	160	0	3.78	57.96	380	76.2	0	0	0	0	0.0525	0	0	0	0	0	0.0147	0.105	0.42	0.0727	14	B	120	124
	Cheese, mozzarella, (52% water, 22.5% M.F.) / Fromage mozzarella, (52% eau, 22.5% M.G.)	250ml, diced / 250ml, en dés (139.48g)	0.5	69.74	Day 3	Dinner - 5:00pm	209.2	15.5	1.527	0	0.718	15.6	9.172	55.1	352.2	0.307	13.9	53	437.3	124.8	0	0.28	0.133	0.021	0.197	0.073	4.882	0	4.882	4.882	0.026	1.59	0.274	0.259	14	C	120	124
	Armstrong Old Cheddar Cheese	ounces	2.01	56.98	Day 2	Lunch - 12:20pm	227.9	13.3	0	0	0	19	11.4	47.5	379.9	0.091	15.38	43.3	455.9	149.86	0	0.11	0.444	0	0.247	0.022	14.81	0	14.81	14.81	0.028	0.501	0	0	14	D	120	124
	Armstrong Old Cheddar Cheese	ounces	3.03	85.9	Day 1	Dinner - 6:20pm	343.6	20	0	0	0.2	28.6	17.2	71.6	572.7	0.137	23.193	65.28	687.2	225.92	0	0.17	0.67	0	0.373	0.034	22.33	0	22.33	22.33	0.042	0.756	0	0	14	D	120	124
	Cheese, mozzarella, (52% water, 22.5% M.F.) / Fromage mozzarella, (52% eau, 22.5% M.G.)	ounces	0.87	24.66	Day 3	Lunch - 12:30pm	74	5.468	0.54	0	0.254	5.513	3.244	19.5	124.6	0.109	4.933	18.7	154.6	44.1	0	0.12	0.047	0.007	0.07	0.026	1.727	0	1.727	1.727	0.009	0.562	0.097	0.092	14	C	120	124
	Armstrong Old Cheddar Cheese	grams	33	33	Day 3	Lunch - 1:00pm	132	7.7	0	0	0.2	11	6.6	27.5	220	0.0528	8.81	25.1	264	86.79	0	0.066	0.257	0	0.143	0.013	8.58	0	8.58	8.58	0.016	0.29	0	0	14	D	120	124
	Cheese - Laughing Cow	grams	32	32	Day 3	Lunch - 12:15pm	53.3	3.048	2	0	1.524	3.048	0.32	7.619	121.9	0	2.88	44.16	289.5	60	0	0	0	0	0.04	0	0	0	0	0	0.0112	0.08	0.32	0.0536	14	B	120	124
	Cheese - Laughing Cow	grams	31	31	Day 1	Lunch - 12:45pm	51.7	2.952	2	0	1.476	2.952	0.31	7.381	118.1	0	2.79	42.78	280.5	60	0	0	0	0	0.0388	0	0	0	0	0	0.0108	0.0775	0.31	0.0536	14	B	120	124
	Cheese, cottage, (2% M.F.) / Fromage cottage, (2% M.G.)	250ml unpacked / 250ml non pressé (238.8g)	1	238.8	Day 3	Dinner - 6:30pm	205.4	28.3	8.74	0	8.764	5.851	2.338	23.9	217.3	0.358	16.7	200.6	788	47.8	0	0	0.096	0.098	0.473	0.258	23.9	0	23.9	23.9	0.053	1.075	0.143	0.024	14	A	120	124
	Cottage Cheese Dry Curd 0.4% MF - Compliments	1/2 cup (125g)	1	125	Day 3	Dinner - 6:30pm	100	22	2	0	2	0.5	0.3	10	40	0.29	13.75	171.25	15	11.25	0	0	0	0	0	0	0	0	0	0	0.02	0.575	0	0	14	A	120	124
	Cheese, cheddar / Fromage cheddar	grams	13	13	Day 2	Breakfast - 8:30am	52.4	3.237	0.166	0	0.068	4.308	2.742	13.6	93.7	0.088	3.64	12.7	80.7	34.4	0	0.863	0.038	0.004	0.049	0.01	2.34	0	2.34	2.34	0.01	0.108	0.075	0.047	14	D	120	124
	Cheese, cheddar / Fromage cheddar	grams	10	10	Day 3	Breakfast - 8:30am	40.3	2.49	0.128	0	0.052	3.314	2.109	10.5	72.1	0.068	2.8	9.8	62.1	26.5	0	0.664	0.029	0.003	0.038	0.008	1.8	0	1.8	1.8	0.007	0.083	0.058	0.037	14	D	120	124
	Cheese, cream / Fromage à la crème	grams	39	39	Day 3	Lunch	133.4	2.313	1.587	0	1.252	13.4	7.524	42.9	38.2	0.148	3.51	53.8	125.2	142.7	0	0.24	0.113	0.008	0.049	0.057	4.29	0	4.29	4.29	0.014	0.098	0.402	0.067	14	D	120	124
	Cheese, Kraft Cheez Whiz Light Pasteurized Process Cheese Product	grams	25	25	Day 1	Lunch - 12:45am	53.8	4.075	4.05	0.05	2.05	2.375	1.6	8.75	104.5	0.04	8.25	74.2	426.2	33.25	0.1	0	0	0	0.082	0	0	0	0	0	0.293	0.375	0.0675	0.0173	204	A	120	124
	Cheese, Kraft Cheez Whiz Light Pasteurized Process Cheese Product	grams	25	25	Day 1	Dinner - 7:20pm	53.8	4.075	4.05	0.05	2.05	2.375	1.6	8.75	104.5	0.04	8.25	74.2	426.2	33.25	0.1	0	0	0	0.082	0	0	0	0	0	0.293	0.375	0.0675	0.0173	204	A	120	124
	Cheese, Kraft Cheez Whiz Pasteurized Process Cheese Sauce	grams	20	20	Day 1	Breakfast - 8:15am	55.2	2.4	1.84	0.06	1.34	4.2	2.62	15	71.8	0.038	5.8	48	327.6	26.6	0.08	0.001	0	0	0.048	0	0	0	0	0	0.034	0.01	0.08	0.02	204	A	120	124
	Cheese, cheddar / Fromage cheddar	grams	30	30	Day 3	Dinner - 7:30pm	120.9	7.47	0.384	0	0.156	9.942	6.328	31.5	216.3	0.204	8.4	29.4	186.3	79.5	0	0.05	0.087	0.008	0.113	0.024	5.4	0	5.4	5.4	0.022	0.249	0.173	0.11	14	D	120	124
	Cheese, cheddar / Fromage cheddar	grams	80	80	Day 2	Lunch - 4:00pm	322.4	19.9	1.024	0	0.416	26.5	16.9	84	576.8	0.544	22.4	78.4	496.8	212	0	0.13	0.232	0.022	0.3	0.064	14.4	0	14.4	14.4	0.059	0.664	0.462	0.292	14	D	120	124
	Armstrong - Marble Cheese	grams	37	37	Day 1	Snack 1 - 10:00am	148	8.633	0	0	0	12.3	7.4	30.8	246.7	0	9.18	28.12	296	97.31	0	0.074	0.289	0	0.16	0.014	9.62	0	9.62	9.62	0.181	0.3256	0.436	0.043	14	D	120	124
	Armstrong - Marble Cheese	grams	34	34	Day 2	Lunch - 1:30pm	136	7.933	0	0	0	11.3	6.8	28.3	226.7	0	9.18	25.84	272	89.42	0	0.074	0.289	0	0.15	0.014	8.84	0	8.84	8.84	0.166	0.299	0.4	0.0395	14	D	120	124
	Cheese, cheddar / Fromage cheddar	grams	37	37	Day 3	Dinner	149.1	9.213	0.474	0	0.192	12.3	7.804	38.9	266.8	0.252	10.4	36.3	229.8	98	0	0.061	0.107	0.01	0.139	0.03	6.66	0	6.66	6.66	0.027	0.307	0.213	0.135	14	D	120	124
	Cheese, mozzarella, (52% water, 22.5% M.F.) / Fromage mozzarella, (52% eau, 22.5% M.G.)	250ml, diced / 250ml, en dés (139.48g)	1	139.48	Day 3	Lunch	418.4	30.9	3.055	0	1.437	31.2	18.3	110.2	704.3	0.614	27.9	106	874.5	249.7	0	0.56	0.265	0.042	0.395	0.145	9.763	0	9.763	9.763	0.052	3.18	0.548	0.519	14	C	120	124
	Cheese, gouda / Fromage gouda	grams	34	34	Day 2	Lunch - 12:30pm	121.4	8.48	0.755	0	0.755	9.52	5.989	38.8	238	0.082	9.86	41.1	278.5	56.1	0	0.17	0.082	0.01	0.114	0.021	7.14	0	7.14	7.14	0.027	0.524	0.089	0.134	14	D	120	124
	Cheese, gouda / Fromage gouda	grams	61	61	Day 3	Lunch - 2:30pm	217.8	15.2	1.354	0	1.354	17.1	10.7	69.5	427	0.146	17.7	73.8	499.6	100.6	0	0.31	0.146	0.018	0.204	0.038	12.8	0	12.8	12.8	0.049	0.939	0.16	0.24	14	D	120	124
	Cheese, parmesan, shredded / Fromage parmesan, râpé en filaments	ounces	0.5	14.18	Day 1	Dinner - 8:30pm	58.8	5.367	0.483	0	0.128	3.875	2.462	10.2	177.6	0.123	7.229	13.7	240.4	32.5	0	0.07	0.035	0.006	0.05	0.041	1.134	0	1.134	1.134	0.015	0.198	0.041	0.049	14	D	120	124
	Tre Stelle - Grana Padano Cheese	1 serving (30g)	0.5	15	Day 2	Dinner - 7:00pm	60	5	0	0.133	0.531	2.212	3	22.5	150	0.048	5.1	27	90	30	2.389	0.075	0.0795	0	0.054	0	0	0	0	0	0	0	0.176	0.0159	14	C	120	124
	Cheese, brie / Fromage brie	grams	7.5	7.5	Day 1	Dinner - 7:30pm	25.1	1.556	0.034	0	0.034	2.076	1.306	7.5	13.8	0.038	1.5	11.4	47.2	13	0	0.038	0.018	0.005	0.039	0.028	4.875	0	4.875	4.875	0.018	0.124	0.038	0.023	14	D	120	124
	Cheese, brie / Fromage brie	grams	15	15	Day 3	Dinner - 6:45pm	50.1	3.113	0.068	0	0.068	4.152	2.612	15	27.6	0.075	3	22.8	94.4	26.1	0	0.08	0.036	0.011	0.078	0.057	9.75	0	9.75	9.75	0.035	0.248	0.077	0.047	14	D	120	124
	Cheese, cheddar / Fromage cheddar	grams	7.5	7.5	Day 1	Dinner - 7:30pm	30.2	1.868	0.096	0	0.039	2.486	1.582	7.875	54.1	0.051	2.1	7.35	46.6	19.9	0	0.498	0.022	0.002	0.028	0.006	1.35	0	1.35	1.35	0.006	0.062	0.043	0.027	14	D	120	124
	Cheese, parmesan, shredded / Fromage parmesan, râpé en filaments	grams	45	45	Day 2	Lunch - 1:00pm	186.8	17	1.534	0	0.405	12.3	7.816	32.4	563.8	0.392	22.9	43.6	763.2	103	0	0.24	0.112	0.018	0.158	0.129	3.6	0	3.6	3.6	0.047	0.63	0.13	0.155	14	D	120	124
	Cheese, parmesan, shredded / Fromage parmesan, râpé en filaments	grams	50	50	Day 1	Lunch - 1:00pm	207.5	18.9	1.705	0	0.45	13.7	8.685	36	626.5	0.435	25.5	48.5	848	114.5	0	0.26	0.125	0.02	0.176	0.144	4	0	4	4	0.052	0.7	0.145	0.172	14	D	120	124
	Kraft Cracker Barrel - Old Light Cheddar Cheese	grams	100	100	Day 3	Lunch - 3:00pm	300	26.7	0	0	0	20	13.3	83.3	666.7	0.16	27	76	700	263	0	0	0.78	0	0.434	0.039	0	0	0	0	0.049	0.88	0	0	14	D	120	124
	Kraft Cracker Barrel - Old Light Cheddar Cheese	grams	15	15	Day 3	Breakfast - 11:00am	45	4	0	0	0	3	2	12.5	100	0.024	4.05	11.4	105	39.45	0	0	0.117	0	0.0651	0.0585	0	0	0	0	0.00735	0.132	0	0	14	D	120	124
	Cheese, cheddar / Fromage cheddar	50g (50g)	0.9	45	Day 1	Dinner - 7:00pm	181.3	11.2	0.576	0	0.234	14.9	9.491	47.2	324.4	0.306	12.6	44.1	279.4	119.2	0	0.07	0.13	0.012	0.169	0.036	8.1	0	8.1	8.1	0.033	0.374	0.26	0.164	14	D	120	124
	Cheese, gouda / Fromage gouda	grams	45	45	Day 1	Snack 2 - 8:30pm	160.6	11.2	0.999	0	0.999	12.6	7.926	51.3	315	0.108	13	54.4	368.6	74.2	0	0.225	0.108	0.013	0.15	0.028	9.45	0	9.45	9.45	0.036	0.693	0.118	0.177	14	D	120	124
	Cheese, gouda / Fromage gouda	grams	42	42	Day 2	Snack 1 - 2:00pm	149.9	10.5	0.932	0	0.932	11.8	7.398	47.9	294	0.101	12.2	50.8	344	69.3	0	0.21	0.101	0.013	0.14	0.026	8.82	0	8.82	8.82	0.034	0.647	0.11	0.165	14	D	120	124
	Armstrong Old Cheddar Cheese	grams	57	57	Day 1	Lunch - 12:30pm	228	13.281	0	0	0.114	18.981	11.4	47.481	380.019	0.0912	15.39	43.32	456	149.91	0	0.114	0.4446	0	0.24738	0.02223	14.82	0	14.82	14.82	0.02793	0.5016	0	0	14	D	120	124
	Armstrong Old Cheddar Cheese	grams	41	41	Day 3	Lunch - 12:30pm	164	9.553	0	0	0.082	13.653	8.2	34.153	273.347	0.0656	11.07	31.16	328	107.83	0	0.082	0.3198	0	0.17794	0.01599	10.66	0	10.66	10.66	0.02009	0.3608	0	0	14	D	120	124
	Armstrong Old Cheddar Cheese	grams	29	29	Day 2	Lunch - 12:00pm	116	6.757	0	0	0.058	9.657	5.8	24.157	193.343	0.0464	7.83	22.04	232	76.27	0	0.058	0.2262	0	0.12586	0.01131	7.54	0	7.54	7.54	0.01421	0.2552	0	0	14	D	120	124
	Kraft Natural Crumbles - Feta With Oregano,sundried Tomatoes and Cracked Peppercorns	grams	15	15	Day 1	Lunch - 12:45pm	45	3	0.5	0.536	0	3.5	0	15	75	0.18	2.88536	99.1	165	18.9643	11.2	0.0589286	0.0273214	0.0235714	0.128036	0.150536	4.86	0	4.86	4.86	0.0642857	0.256607	0.0492857	0.0401786	14	C	120	124
	MONTERY JACK - Cheese	grams	10	10	Day 3	Dinner - 6:30pm	37.4	2.449	0.067	0	0.049	10.7	1.55625	8.822	74.1	0.064	0.225	8.20312	53.6	21.5469	0	0.0546875	0.023125	0	0.0296875	0.0102812	0	0	0	0	0	0.0798437	0	0	14	C	120	124
	Cheese, cheddar / Fromage cheddar	grams	68	68	Day 2	Lunch - 1:50pm	274	16.9	0.87	0	0.354	22.5	14.3	71.4	490.3	0.462	19	66.6	422.3	180.2	0	0.112875	0.197	0.018	0.255	0.054	12.2	0	12.2	12.2	0.05	0.564	0.392	0.248	14	D	120	124
	Cheese, cheddar / Fromage cheddar	grams	66	66	Day 1	Lunch - 11:30am	266	16.4	0.845	0	0.343	21.9	13.9	69.3	475.9	0.449	18.5	64.7	409.9	174.9	0	0.10955	0.191	0.018	0.248	0.053	11.9	0	11.9	11.9	0.049	0.548	0.381	0.241	14	D	120	124
	Cheese, cheddar / Fromage cheddar	grams	65	65	Day 3	Snack 2 - 4:12pm	261.9	16.2	0.832	0	0.338	21.5	13.7	68.2	468.6	0.442	18.2	63.7	403.6	172.2	0	0.1079	0.188	0.018	0.244	0.052	11.7	0	11.7	11.7	0.048	0.54	0.375	0.237	14	D	120	124
	Cheese, cheddar / Fromage cheddar	50g (50g)	0.15	7.5	Day 1	Breakfast - 9:30am	30.2	1.868	0.096	0	0.039	2.486	1.582	7.875	54.1	0.051	2.1	7.35	46.6	19.9	0	0.498	0.022	0.002	0.028	0.006	1.35	0	1.35	1.35	0.006	0.062	0.043	0.027	14	D	120	124
	Cheese - Mini Babybell	1 serving (20g)	2	40	Day 1	Lunch - 1:00pm	78	10	0	0	0	12	2	30	330	0	12	38	280	80	0	0	0	0	0.1556	0	0	0	0	0	0.0304	0.616	0.167	0.0988	14	D	120	124
	Cheese - Mini Babybell	1 serving (20g)	2	40	Day 3	Dinner - 6:30pm	78	10	0	0	0	12	2	30	330	0	12	38	280	80	0	0	0	0	0.1556	0	0	0	0	0	0.0304	0.616	0.167	0.0988	14	D	120	124
	Cheese, blue / Fromage bleu	ounces	2	56.7	Day 2	Lunch - 2:00pm	200.2	12.1	1.327	0	0.284	16.3	10.6	42.5	299.4	0.176	13	145.2	791	112.3	0	0.2975	0.142	0.016	0.217	0.576	20.4	0	20.4	20.4	0.094	0.692	0.304	0.15	14	D	120	124
	Cheese, parmesan, hard / Fromage parmesan, pâte dure	15g (15g)	2	30	Day 2	Lunch - 2:00pm	116.743	10.655	0.959264	0	0.238319	7.69177	4.88616	20.2592	352.75	0.244308	13.1033	27.4046	477.268	61.6602	0	0.141594	0.0655692	0.0116637	0.0988792	0.0807005	2.08056	0	2.08056	2.08056	0.0271103	0.357478	0.0810158	0.0884764	14	D	120	124
	Armstrong Old Cheddar Cheese	grams	80.5	80.5	Day 1	Breakfast - 8:30am	322	18.7565	0	0	0.161	26.8065	16.1	67.0565	536.694	0.1288	21.735	61.18	644	211.715	0	0.161	0.6279	0	0.34937	0.031395	20.93	0	20.93	20.93	0.039445	0.7084	0	0	14	D	120	124
	Cheese, cheddar / Fromage cheddar	ounces	1.16	32.89	Day 3	Lunch - 12:32pm	132.5	8.189	0.421	0	0.171	10.9	6.936	34.5	237.1	0.224	9.208	32.2	204.2	87.1	0	0.0546	0.095	0.009	0.123	0.026	5.919	0	5.919	5.919	0.024	0.273	0.19	0.12	14	D	120	124
	Cheese, cheddar / Fromage cheddar	ounces	1.15	32.6	Day 1	Lunch - 12:05pm	131.4	8.118	0.417	0	0.17	10.8	6.877	34.2	235.1	0.222	9.129	32	202.5	86.4	0	0.054125	0.095	0.009	0.122	0.026	5.868	0	5.868	5.868	0.024	0.271	0.188	0.119	14	D	120	124
	Cheese, mozzarella, partially skim, (52% water, 16.5% M.F.) / Fromage mozzarella, partiellement écrémé, (52% eau, 16.5% M.G.)	ounces	1.51	42.81	Day 3	Dinner - 8:00pm	108.7	10.4	1.186	0	0.484	6.815	4.33	27.4	334.8	0.094	9.846	36	265	54.4	0	0.128425	0.06	0.008	0.13	0.045	3.853	0	3.853	3.853	0.03	0.351	0.143	0.059	14	C	120	124
	Black Diamond - Cheese Slices	grams	40	40	Day 1	Lunch - 1:00pm	95.2	7.619	3.81	1.6	1.905	7.619	3.81	19	114.3	0.576	10.8	30.3636	590.5	132	1.92	0.24	0.283636	0.0109091	0.170909	0.0236364	10.8	0	10.8	10.8	0.0272727	0.44	0.469091	0.0454545	14	D	120	124
	Cheese, Kraft Cheez Whiz Light Pasteurized Process Cheese Product	grams	5	5	Day 2	Breakfast - 9:00am	10.76	0.815	0.81	0.01	0.41	0.475	0.32	1.75	20.9	0.008	1.65	14.84	85.24	6.65	0.02	0	0	0	0.0164	0	0	0	0	0	0.0586	0.075	0.0135	0.00346	204	A	120	124
	Black Diamond - Cheese Slices	ounces	1	28.35	Day 3	Lunch - 12:00pm	67.5	5.4	2.7	1.134	1.35	5.4	2.7	13.5	81	0.408	7.56	21.2545	418.5	92.4	1.361	0.168	0.198545	0.00763636	0.119636	0.0165455	7.56	0	7.56	7.56	0.0190909	0.308	0.328364	0.0318182	14	D	120	124
	Cheese, cottage, (2% M.F.) / Fromage cottage, (2% M.G.)	grams	145	145	Day 1	Dinner - 5:30pm	124.7	17.2	5.307	0	5.322	3.553	1.42	14.5	132	0.218	10.2	121.8	478.5	29	0	0	0.058	0.059	0.287	0.157	14.5	0	14.5	14.5	0.032	0.653	0.087	0.015	14	A	120	124
	Cheese, cottage, (2% M.F.) / Fromage cottage, (2% M.G.)	grams	145	145	Day 1	Dinner - 5:30pm	124.7	17.2	5.307	0	5.322	3.553	1.42	14.5	132	0.218	10.2	121.8	478.5	29	0	0	0.058	0.059	0.287	0.157	14.5	0	14.5	14.5	0.032	0.653	0.087	0.015	14	A	120	124
	Old White Cheddar Cheese - Baldersons	grams	30	30	Day 2	Dinner - 5:45pm	130.159	8.46561	0	0	0	10.582	7.40741	29.6296	201.058	0	0	0	201.058	0	0	0.0603175	0	0	0.130688	0.0116402	0	0	0	0	0.0147619	0.265079	0	0	14	D	120	124
	Cheese, cheddar / Fromage cheddar	grams	38	38	Day 1	Lunch - 12:27pm	153.1	9.462	0.486	0	0.198	12.6	8.015	39.9	274	0.258	10.6	37.2	236	100.7	0	0.063075	0.11	0.01	0.142	0.03	6.84	0	6.84	6.84	0.028	0.315	0.219	0.139	14	D	120	124
	Cheese, cheddar / Fromage cheddar	grams	25	25	Day 2	Dinner - 7:30pm	100.8	6.225	0.32	0	0.13	8.285	5.273	26.2	180.2	0.17	7	24.5	155.2	66.2	0	0.0415	0.072	0.007	0.094	0.02	4.5	0	4.5	4.5	0.018	0.208	0.144	0.091	14	D	120	124
	Cheese, cheddar / Fromage cheddar	grams	8	8	Day 1	Breakfast - 9:00am	32.2	1.992	0.102	0	0.042	2.651	1.687	8.4	57.7	0.054	2.24	7.84	49.7	21.2	0	0.531	0.023	0.002	0.03	0.006	1.44	0	1.44	1.44	0.006	0.066	0.046	0.029	14	D	120	124
	Cheese, cheddar / Fromage cheddar	grams	8	8	Day 2	Breakfast - 8:00am	32.2	1.992	0.102	0	0.042	2.651	1.687	8.4	57.7	0.054	2.24	7.84	49.7	21.2	0	0.531	0.023	0.002	0.03	0.006	1.44	0	1.44	1.44	0.006	0.066	0.046	0.029	14	D	120	124
	Cheese, feta / Fromage féta	grams	12	12	Day 1	Breakfast - 9:00am	31.7	1.705	0.491	0	0.491	2.554	1.794	10.7	59.2	0.078	2.28	7.44	133.9	15	0	0.048	0.022	0.018	0.101	0.119	3.84	0	3.84	3.84	0.051	0.203	0.039	0.032	14	C	120	124
	Cheese, feta / Fromage féta	grams	12	12	Day 2	Breakfast - 8:00am	31.7	1.705	0.491	0	0.491	2.554	1.794	10.7	59.2	0.078	2.28	7.44	133.9	15	0	0.048	0.022	0.018	0.101	0.119	3.84	0	3.84	3.84	0.051	0.203	0.039	0.032	14	C	120	124
	Cheese, mozzarella, (48% water, 25% M.F.) / Fromage mozzarella (48%d'humidité, 25% M.G.)	grams	25	25	Day 2	Dinner - 7:30pm	79.8	5.4	0.618	0	0.252	6.16	3.89	22.2	143.8	0.05	5.25	18.8	103.8	49.2	0	0.1125	0.052	0.004	0.068	0.024	2	0	2	2	0.016	0.182	0.142	0.053	14	C	120	124
	Cheese, mozzarella, (48% water, 25% M.F.) / Fromage mozzarella (48%d'humidité, 25% M.G.)	250ml shredded / 250ml filamenté (118.34g)	1	118.34	Day 3	Dinner - 7:30pm	377.5	25.6	2.923	0	1.195	29.2	18.4	105.3	680.5	0.237	24.9	88.8	491.1	233.1	0	0.5325	0.249	0.019	0.32	0.111	9.467	0	9.467	9.467	0.073	0.864	0.67	0.251	14	C	120	124
	Cheese, feta / Fromage féta	1 ounce (28.35g)	0.625	17.72	Day 1	Dinner - 6:30pm	46.8	2.518	0.725	0	0.725	3.771	2.648	15.8	87.4	0.115	3.367	11	197.7	22.1	0	0.070875	0.032	0.027	0.15	0.176	5.67	0	5.67	5.67	0.075	0.299	0.058	0.047	14	C	120	124
	Cheese, parmesan, shredded / Fromage parmesan, râpé en filaments	50g (50g)	1	50	Day 2	Lunch - 1:00pm	207.5	18.9	1.705	0	0.45	13.7	8.685	36	626.5	0.435	25.5	48.5	848	114.5	0	0.2625	0.125	0.02	0.176	0.144	4	0	4	4	0.052	0.7	0.145	0.172	15	D	120	124
	Ilchester - Sliced Applewood Smoke Flavoured Cheddar Cheese	grams	63	63	Day 3	Dinner - 7:30pm	258.3	15.8	0	0	0	12.2	12.6	41	420	0.8	17.01	47.88	356	165.69	0	0	0.4914	0	0.27342	0.2457	0	0	0	0	0.03087	0.5544	0	0	14	D	120	124
	Kraft Cracker Barrel - Old Light Cheddar Cheese	grams	28	28	Day 2	Dinner - 7:30pm	84	7.476	0	0	0	5.6	3.724	23.324	186.676	0.0448	7.56	21.28	196	73.64	0	0	0.2184	0	0.12152	0.01092	0	0	0	0	0.01372	0.2464	0	0	14	D	120	124
	Cheese, cheddar / Fromage cheddar	ounces	3	85.05	Day 2	Dinner	342.8	21.2	1.089	0	0.442	28.2	17.9	89.3	613.2	0.578	23.8	83.3	528.2	225.4	0	0.141175	0.247	0.023	0.319	0.068	15.3	0	15.3	15.3	0.063	0.706	0.491	0.31	14	D	120	124
	Cheese, mozzarella, (52% water, 22.5% M.F.) / Fromage mozzarella, (52% eau, 22.5% M.G.)	250ml, diced / 250ml, en dés (139.48g)	0.182	25.38	Day 3	Lunch	76.2	5.628	0.556	0	0.261	5.673	3.339	20.1	128.2	0.112	5.077	19.3	159.2	45.4	0	0.10155	0.048	0.008	0.072	0.026	1.777	0	1.777	1.777	0.009	0.579	0.1	0.094	14	C	120	124
	Saputo Lite - Havarti	1 slice (32g)	1	32	Day 2	Lunch - 11:00am	90	8	0.989091	0	0.154182	10.6589	5	20	200	0.0450909	8.64	24.2909	220	105.6	0	0.192	0.226909	0.00872727	0.136727	0.0189091	8.64	0	8.64	8.64	0.0218182	0.352	0.375273	0.0363636	14	D	120	124
	Cheese, cheddar / Fromage cheddar	50g (50g)	0.3	15	Day 1	Lunch - 2:00pm	60.4	3.735	0.192	0	0.078	4.971	3.164	15.8	108.2	0.102	4.2	14.7	93.2	39.8	0	0.0249	0.044	0.004	0.056	0.012	2.7	0	2.7	2.7	0.011	0.124	0.087	0.055	14	D	120	124
	Cheese, Mozzarella, part skim - string cheese	1 stick (28g)	1	28	Day 3	Dinner - 10:00pm	84.6	7.269	1.072	0	0.168	5.608	3.548	15.1	204.7	0.07	7.28	26.6	147.8	38.4	0	0.14	0.104	0.028	0.092	0.033	2.8	0	2.8	2.8	0.022	0.647	0.125	0.051	14	C	120	124
	Cheese, parmesan, shredded / Fromage parmesan, râpé en filaments	50g (50g)	1	50	Day 1	Lunch - 2:00pm	207.5	18.9	1.705	0	0.45	13.7	8.685	36	626.5	0.435	25.5	48.5	848	114.5	0	0.2625	0.125	0.02	0.176	0.144	4	0	4	4	0.052	0.7	0.145	0.172	14	D	120	124
	Cheese, parmesan, shredded / Fromage parmesan, râpé en filaments	grams	18	18	Day 1	Snack 1 - 9:30pm	74.7	6.815	0.614	0	0.162	4.921	3.127	13	225.5	0.157	9.18	17.5	305.3	41.2	0	0.0945	0.045	0.007	0.063	0.052	1.44	0	1.44	1.44	0.019	0.252	0.052	0.062	14	D	120	124
	Cheese, swiss (emmental) / Fromage suisse (emmental)	ounces	1	28.35	Day 3	Lunch - 4:00pm	107.7	7.635	1.525	0	0.374	7.881	5.04	26.1	224.2	0.057	10.8	21.8	54.4	62.4	0	0.14175	0.108	0.018	0.084	0.026	1.701	0	1.701	1.701	0.024	0.947	0.176	0.1	14	D	120	124
	Cheese, goat, soft, (more than 55% water, 21% M.F.) / Fromage de chèvre, mou, (plus de 55% eau, 21% M.G.)	100ml crumbled / 100ml émietté (63.4g)	0.05	3.17	Day 1	Lunch - 12:45pm	8.496	0.587	0.028	0	0.028	0.668	0.462	1.458	4.438	0.06	0.507	0.824	11.7	9.13	0	0.0119	0.006	0.002	0.012	0.014	0.38	0	0.38	0.38	0.008	0.006	0.016	0	14	D	120	124
	Armstrong Old Cheddar Cheese	grams	38	38	Day 1	Snack 1 - 10:30pm	400	23.3	0	0	0.2	33.3	20	83.3	666.7	0.16	27	76	800	263	0	0.2	0.78	0	0.434	0.039	26	0	26	26	0.049	0.88	0	0	14	D	120	124
	Armstrong Old Cheddar Cheese	grams	9	9	Day 3	Dinner	152	8.867	0	0	0.076	12.7	7.6	31.7	253.3	0.0608	10.26	28.88	304	99.94	0	0.076	0.2964	0	0.16492	0.01482	9.88	0	9.88	9.88	0.01862	0.3344	0	0	14	D	120	124
	Armstrong Old Cheddar Cheese	ounces	2	56.7	Day 2	Lunch - 1:30pm	226.8	13.2	0	0	0.112	18.9	11.3	47.2	378	0.0896	15.12	42.56	453.6	147.28	0	0.112	0.4368	0	0.24304	0.02184	14.56	0	14.56	14.56	0.02744	0.4928	0	0	14	D	120	124
	Armstrong Old Cheddar Cheese	ounces	2	56.7	Day 3	Breakfast	226.8	13.2	0	0	0.112	18.9	11.3	47.2	378	0.0896	15.12	42.56	453.6	147.28	0	0.112	0.4368	0	0.24304	0.02184	14.56	0	14.56	14.56	0.02744	0.4928	0	0	14	D	120	124
	Armstrong Old Cheddar Cheese	ounces	2	56.7	Day 1	Lunch - 1:00pm	36	2.1	0	0	0.018	3	1.8	7.5	60	0.0144	2.43	6.84	72	23.67	0	0.018	0.0702	0	0.03906	0.00351	2.34	0	2.34	2.34	0.00441	0.0792	0	0	14	D	120	124
	Cheese, feta / Fromage féta	1 ounce (28.35g)	1	28.35	Day 1	Lunch - 1:00pm	74.8	4.029	1.16	0	1.16	6.033	4.237	25.2	139.8	0.184	5.387	17.6	316.4	35.4	0	0.1134	0.051	0.044	0.239	0.281	9.072	0	9.072	9.072	0.12	0.479	0.092	0.075	14	C	120	124
	Cheese, Parmesan, shredded	1 tbsp (5g)	1	5	Day 1	Breakfast - 8:00am	20.8	1.893	0.171	0	0.045	1.367	0.869	3.6	62.6	0.044	2.55	4.85	84.8	11.4	0	0.000625	0.012	0.002	0.018	0.014	0.4	0	0.4	0.4	0.005	0.07	0.014	0.017	14	D	120	124
	Cheese, cheddar / Fromage cheddar	grams	68	68	Day 2	Lunch - 1:50pm	274	16.9	0.87	0	0.354	22.5	14.3	71.4	490.3	0.462	19	66.6	422.3	180.2	0	0.112875	0.197	0.018	0.255	0.054	12.2	0	12.2	12.2	0.05	0.564	0.392	0.248	14	D	120	124
	Cheese, cheddar / Fromage cheddar	grams	66	66	Day 1	Lunch - 11:30am	266	16.4	0.845	0	0.343	21.9	13.9	69.3	475.9	0.449	18.5	64.7	409.9	174.9	0	0.10955	0.191	0.018	0.248	0.053	11.9	0	11.9	11.9	0.049	0.548	0.381	0.241	14	D	120	124
	Cheese, cheddar / Fromage cheddar	grams	65	65	Day 3	Snack 2 - 3:02pm	261.9	16.2	0.832	0	0.338	21.5	13.7	68.2	468.6	0.442	18.2	63.7	403.6	172.2	0	0.1079	0.188	0.018	0.244	0.052	11.7	0	11.7	11.7	0.048	0.54	0.375	0.237	14	D	120	124
	Armstrong - Marble Cheese	grams	66	66	Day 2	Lunch - 12:45pm	264	15.4	0	0	0	22	13.2	55	440	0	16.3751	50.16	528	173.58	0	0.132	0.515514	0	0.285405	0.024973	17.16	0	17.16	17.16	0.322865	0.5808	0.77773	0.0767027	14	D	120	124
	Cheese, cheddar / Fromage cheddar	ounces	1	28.35	Day 3	Dinner - 6:00pm	114.3	7.059	0.363	0	0.147	9.395	5.98	29.8	204.4	0.193	7.938	27.8	176.1	75.1	0	0.04705	0.082	0.008	0.106	0.023	5.103	0	5.103	5.103	0.021	0.235	0.164	0.103	14	D	120	124
	Cheese, feta / Fromage féta	1 ounce (28.35g)	0.05	1.42	Day 2	Breakfast - 7:00am	3.742	0.201	0.058	0	0.058	0.302	0.212	1.262	6.988	0.009	0.269	0.879	15.8	1.772	0	0.005675	0.003	0.002	0.012	0.014	0.454	0	0.454	0.454	0.006	0.024	0.005	0.004	14	C	120	124
	Cheese, cream / Fromage à la crème	30ml (29.47g)	1	29.47	Day 3	Lunch - 1:00pm	100.8	1.748	1.2	0	0.946	10.1	5.686	32.4	28.9	0.112	2.653	40.7	94.6	107.9	0	0.184225	0.085	0.006	0.037	0.043	3.242	0	3.242	3.242	0.01	0.074	0.304	0.051	14	D	120	124
	Cheese, mozzarella, partially skim, (52% water, 16.5% M.F.) / Fromage mozzarella, partiellement écrémé, (52% eau, 16.5% M.G.)	250ml, shredded / 250ml, filamenté (119.4g)	1.5	179.1	Day 3	Dinner - 5:00pm	454.9	43.4	4.961	0	2.024	28.5	18.1	114.6	1401	0.394	41.2	150.4	1109	227.5	0	0.5375	0.251	0.032	0.543	0.188	16.1	0	16.1	16.1	0.125	1.469	0.6	0.245	14	C	120	124
	Cheese, parmesan, hard / Fromage parmesan, pâte dure	grams	60	60	Day 3	Lunch - 1:00pm	235.2	21.4	1.932	0	0.48	15.5	9.846	40.8	710.4	0.492	26.4	55.2	961.2	124.2	0	0.285	0.132	0.023	0.199	0.163	4.2	0	4.2	4.2	0.055	0.72	0.163	0.178	14	D	120	124
	Cheese, cheddar / Fromage cheddar	50g (50g)	0.15	7.5	Day 3	Lunch - 12:30pm	30.2	1.868	0.096	0	0.039	2.486	1.582	7.875	54.1	0.051	2.1	7.35	46.6	19.9	0	0.01245	0.022	0.002	0.028	0.006	1.35	0	1.35	1.35	0.006	0.062	0.043	0.027	14	D	120	124
	Armstrong Old Cheddar Cheese	ounces	0.59	16.73	Day 2	Dinner - 6:30pm	226.8	13.2	0	0	0.112	18.9	11.3	47.2	378	0.0896	15.12	42.56	453.6	147.28	0	0.112	0.4368	0	0.24304	0.02184	14.56	0	14.56	14.56	0.02744	0.4928	0	0	14	D	120	124
	Cheese spread, American or Cheddar cheese base - Country Crock Fresh Cheddar Cold Pack Cheese Product	1 cup (244g)	0.25	61	Day 1	Breakfast - 8:50am	176.9	10	5.325	0	4.465	13	8.129	33.6	342.8	0.201	17.7	147.6	820.4	105.5	0	0	0.116	0.029	0.263	0.08	4.27	0	4.27	4.27	0.071	0.244	0.244	0.136	204	A	120	124
	Cheese, feta / Fromage féta	1 ounce (28.35g)	0.05	1.42	Day 2	Lunch - 12:30pm	3.742	0.201	0.058	0	0.058	0.302	0.212	1.262	6.988	0.009	0.269	0.879	15.8	1.772	0	0.005675	0.003	0.002	0.012	0.014	0.454	0	0.454	0.454	0.006	0.024	0.005	0.004	14	C	120	124
	Cheese, mozzarella, (48% water, 25% M.F.) / Fromage mozzarella (48%d'humidité, 25% M.G.)	ounces	1.47	41.67	Day 3	Dinner - 9:00pm	132.9	9.002	1.029	0	0.421	10.3	6.485	37.1	239.6	0.083	8.752	31.3	172.9	82.1	0	0.187525	0.088	0.007	0.113	0.039	3.334	0	3.334	3.334	0.026	0.304	0.236	0.088	14	C	120	124
	Armstrong - Marble Cheese	grams	160	160	Day 2	Lunch - 1:30pm	640	37.3	0	0	0	53.3	32	133.3	1067	0	39.6973	121.6	1280	420.8	0	0.32	1.24973	0	0.691892	0.0605405	41.6	0	41.6	41.6	0.782703	1.408	1.88541	0.185946	14	D	120	124
	Armstrong - Marble Cheese	1 serving (30g)	0.5	15	Day 1	Lunch - 12:30pm	60	3.5	0	0	0	5	3	12.5	100	0	3.72162	11.4	120	39.45	0	0.03	0.117162	0	0.0648649	0.00567568	3.9	0	3.9	3.9	0.0733784	0.132	0.176757	0.0174324	14	D	120	124
	Armstrong Old Cheddar Cheese	grams	72	72	Day 3	Lunch - 1:30pm	288	16.8	0	0	0.144	24	14.4	60	480	0.1152	19.44	54.72	576	189.36	0	0.144	0.5616	0	0.31248	0.02808	18.72	0	18.72	18.72	0.03528	0.6336	0	0	14	D	120	124
	Cheese, Kraft Cheez Whiz Pasteurized Process Cheese Sauce	2 tbsp (33g)	0.5	16.5	Day 1	Lunch - 12:30pm	45.5	1.98	1.518	0.05	1.106	3.465	2.162	12.4	59.2	0.031	4.785	39.6	270.3	21.945	0.066	0.000825	0	0	0.04	0	0	0	0	0	0.02805	0.00825	0.066	0.0165	204	A	120	124
	Cheese, cottage, (2% M.F.) / Fromage cottage, (2% M.G.)	grams	100	100	Day 3	Lunch - 12:15pm	86	11.8	3.66	0	3.67	2.45	0.979	10	91	0.15	7	84	330	20	0	0	0.04	0.041	0.198	0.108	10	0	10	10	0.022	0.45	0.06	0.01	14	A	120	124
	Cheese, Mozzarella, part skim - string cheese	grams	42	42	Day 3	Lunch - 12:15pm	126.8	10.9	1.609	0	0.252	8.413	5.321	22.7	307	0.105	10.9	39.9	221.8	57.5	0	0.21	0.155	0.042	0.138	0.05	4.2	0	4.2	4.2	0.033	0.97	0.187	0.076	14	C	120	124
	Kolios - Kasseri semi soft sheep milk cheese	grams	30	30	Day 2	Dinner - 6:00pm	101.8	1.794	1.608	0	0	2.1	1.38	8.1	57.9	0.03	5.4	41.1	13.2	13.2	1.26	0	0	0.0195	0.1065	0.1251	2.1	0	2.1	2.1	0.018	0.213	0.0543	0.0381	14	D	120	124
	Cheese, gouda / Fromage gouda	grams	54	54	Day 2	Lunch - 12:00pm	192.8	13.5	1.199	0	1.199	15.1	9.512	61.6	378	0.13	15.7	65.3	442.3	89.1	0	0.27	0.13	0.016	0.18	0.034	11.3	0	11.3	11.3	0.043	0.832	0.142	0.213	14	D	120	124
	Cheese, gouda / Fromage gouda	grams	40	40	Day 3	Lunch - 1:30pm	142.8	9.976	0.888	0	0.888	11.2	7.046	45.6	280	0.096	11.6	48.4	327.6	66	0	0.2	0.096	0.012	0.134	0.025	8.4	0	8.4	8.4	0.032	0.616	0.105	0.158	14	D	120	124
	Cheese, gouda / Fromage gouda	grams	14	14	Day 1	Lunch - 12:30pm	50	3.492	0.311	0	0.311	3.92	2.466	16	98	0.034	4.06	16.9	114.7	23.1	0	0.07	0.034	0.004	0.047	0.009	2.94	0	2.94	2.94	0.011	0.216	0.037	0.055	14	D	120	124
	Cheese, brie / Fromage brie	grams	30	30	Day 3	Snack 1 - 8:30pm	100.2	6.225	0.135	0	0.135	8.304	5.223	30	55.2	0.15	6	45.6	188.7	52.2	0	0.15	0.072	0.021	0.156	0.114	19.5	0	19.5	19.5	0.07	0.495	0.154	0.094	14	D	120	124
	Cheese, parmesan, dry grated / Fromage parmesan, râpé	15ml (6.34g)	1	6.34	Day 1	Lunch - 11:30AM	27.4	2.438	0.257	0	0.057	1.814	1.097	5.579	70.3	0.057	2.409	7.925	96.9	14.5	0	0.033275	0.016	0.002	0.031	0.007	0.634	0	0.634	0.634	0.003	0.143	0.06	0.012	14	D	120	124
	Cracker Barrel - Swiss Cheese	1 slice (20g)	1	20	Day 2	Dinner - 7:30PM	80	5	0.8	0	0.0963636	6	4	7	200	0.288	5.4	15.1818	40	0.8	0	0.12	0.141818	0.00545455	0.0854545	0.0118182	5.4	0	5.4	5.4	0.0136364	0.22	0.234545	0.0227273	14	D	120	124
	Kraft Cracker Barrel - Old Light Cheddar Cheese	grams	50	50	Day 3	Dinner - 8:00PM	150	13.3	0	0	0	10	6.666	41.7	333.3	0.08	13.5	38	350	131.5	0	0	0.39	0	0.217	0.0195	0	0	0	0	0.0245	0.44	0	0	14	D	120	124
	Armstrong Old Cheddar Cheese	ounces	0.5	14.18	Day 1	Dinner - 7:30PM	56.7	3.307	0	0	0.028	4.725	2.835	11.8	94.5	0.0224	3.78	10.64	113.4	36.82	0	0.028	0.1092	0	0.06076	0.00546	3.64	0	3.64	3.64	0.00686	0.1232	0	0	14	D	120	124
	Saputo Lite - Havarti	grams	20	20	Day 3	Lunch - 12:00PM	56.2	5	0.618182	0	0.0963636	6.66182	3.125	12.5	125	0.0281818	5.4	15.1818	137.5	66	0	0.12	0.141818	0.00545455	0.0854545	0.0118182	5.4	0	5.4	5.4	0.0136364	0.22	0.234545	0.0227273	14	D	120	124
	PC Cream on Top Coconut 6% MF Yogurt	grams	200	200	Day 1	Snack 2 - 8:30pm	400	8	22.9	0	18.3	11.4	8	34.3	228.6	0.412	0	348	97.1	0	0	0	0	0	0.368	0	0	0	0	0	0	0.38	0.398	0	203	A	120	125
	PC Cream on Top Coconut 6% MF Yogurt	grams	128	128	Day 2	Breakfast	256	5.12	14.6	0	11.7	7.314	5.12	21.9	146.3	0.264	0	222.72	62.2	0	0	0	0	0	0.236	0	0	0	0	0	0	0.38	0.255	0	203	A	120	125
	Greek Yogurt 0% MF Plain	grams	58.49	58.49	Day 3	Breakfast - 11:30am	33.4	6.016	2.006	0	1.87	0	0	3.342	66.8	0.361	0	82.2	23.4	0	0	0	0	0	0.105	0	0	0	0	0	0	0.1044	0	0	15	A	120	125
	Yogurt, plain, NS as to type of milk	grams	226	226	Day 3	Lunch - 12:45pm	142.4	11.9	15.9	0	15.9	3.503	2.26	13.6	413.6	0.181	38.4	528.8	158.2	31.6	1.808	0	0.068	0.099	0.484	0.258	24.9	0	24.9	24.9	0.111	1.266	0.07	0.029	15	B	120	125
	Yogurt, plain, NS as to type of milk	grams	83	83	Day 1	Breakfast - 7:30am	52.3	4.358	5.843	0	5.843	1.286	0.83	4.98	151.9	0.066	14.1	194.2	58.1	11.6	0.664	0	0.025	0.037	0.178	0.095	9.13	0	9.13	9.13	0.041	0.465	0.026	0.011	15	B	120	125
	Yogurt, plain, NS as to type of milk	grams	75	75	Day 2	Breakfast - 8:30am	47.2	3.938	5.28	0	5.28	1.162	0.75	4.5	137.2	0.06	12.8	175.5	52.5	10.5	0.6	0	0.022	0.033	0.16	0.086	8.25	0	8.25	8.25	0.037	0.42	0.023	0.01	15	B	120	125
	Greek Blueberry Yogurt 0% - Liberty	grams	168	168	Day 2	Breakfast - 9:30am	134.4	13.4	21.8	0	20.2	0	0	0	168	0	0	246.96	50.4	0	2.016	0	0	0	0.304	0	0	0	0	0	0	0.302	0	0	15	A	120	125
	Greek 0% Lactose Free Yogurt - Plain - Liberte	3/4 cup (175g)	1	175	Day 1	Breakfast - 8:40am	100	18.5	6.172	0	6.172	0.07	0	0	123.5	0	0	260	67.9	0	0	0	0	0	0.3168	0	0	0	0	0	0	0.315	0	0	15	A	120	125
	Greek 0% Lactose Free Yogurt - Plain - Liberte	3/4 cup (175g)	1	175	Day 2	Breakfast - 8:30am	100	18.5	6.172	0	6.172	0.07	0	0	123.5	0	0	260	67.9	0	0	0	0	0	0.3168	0	0	0	0	0	0	0.315	0	0	15	A	120	125
	Non-fat Apricot and Mango Yogurt - Trader Joe's	ounces	6	170.1	Day 1	Breakfast - 5:00am	130.1	6.003	25	0	23	0	0	0	250.1	0	22.1	330.2	95.1	0	0	0	0	0	0.2992	0.17	0	0	0	0	0	0.595	0	0	15	A	120	125
	Yogurt, fruit variety, nonfat milk, sweetened with low-calorie sweetener - Jenny's Cuisine Strawberry Flavored Nonfat Yogurt Mix prepared with water	grams	100	100	Day 3	Lunch - 12:15pm	51	4.4	8.04	0.5	6.9	0.16	0.089	2	153	0.26	17	228	58	2	11	0	0.07	0.042	0.185	0.209	13	0	13	13	0.047	0.46	0.011	0.007	15	A	120	125
	Yogurt, vanilla, lemon, or coffee flavor, NS as to type of milk	1 cup (8 fl oz) (245g)	0.5	122.5	Day 3	Breakfast - 7:00am	104.1	6.039	16.9	0	16.9	1.531	0.987	6.125	209.5	0.086	19.6	268.3	80.8	14.7	0.98	0	0.024	0.051	0.246	0.131	13.5	0	13.5	13.5	0.055	0.649	0.031	0.012	15	B	120	125
	Greek Yogurt 0% MF Plain	3/4 cup (175g)	1.333	233.27	Day 3	Breakfast	133.3	24	7.999	0	7.46	0	0	13.3	266.6	1.439	0	327.9	93.3	0	0	0	0	0	0.422	0	0	0	0	0	0	0.4194	0	0	15	A	120	125
	Greek 0% Lactose Free Yogurt - Plain - Liberte	3/4 cup (175g)	0.71	124.25	Day 3	Lunch - 12:00pm	71	13.1	4.382	0	4.382	0	0	0	87.7	0	0	260	48.2	0	0	0	0	0	0.224	0	0	0	0	0	0	0.22	0	0	15	A	120	125
	Greek 0% Lactose Free Yogurt - Plain - Liberte	1 ounce (28.35g)	2	56.7	Day 1	Dinner - 5:45pm	32.4	6	2	0	2	0	0	0	40	0	0	82.32	22	0	0	0	0	0	0.103	0	0	0	0	0	0	0.102	0	0	15	A	120	125
	Yogurt, plain, whole milk	grams	100	100	Day 1	Breakfast - 8:15am	61	3.47	4.66	0	4.66	3.25	2.096	13	121	0.05	12	155	46	27	0.5	0	0.06	0.029	0.142	0.075	7	0	7	7	0.032	0.37	0.065	0.027	15	B	120	125
	Yogurt, plain, whole milk	grams	100	100	Day 2	Dinner - 5:30pm	61	3.47	4.66	0	4.66	3.25	2.096	13	121	0.05	12	155	46	27	0.5	0	0.06	0.029	0.142	0.075	7	0	7	7	0.032	0.37	0.065	0.027	15	B	120	125
	Yogurt, plain, whole milk	grams	50	50	Day 2	Breakfast - 8:30am	30.5	1.735	2.33	0	2.33	1.625	1.048	6.5	60.5	0.025	6	77.5	23	13.5	0.25	0	0.03	0.014	0.071	0.038	3.5	0	3.5	3.5	0.016	0.185	0.032	0.014	15	B	120	125
	Yogurt, plain, whole milk	grams	50	50	Day 3	Breakfast - 8:00am	30.5	1.735	2.33	0	2.33	1.625	1.048	6.5	60.5	0.025	6	77.5	23	13.5	0.25	0	0.03	0.014	0.071	0.038	3.5	0	3.5	3.5	0.016	0.185	0.032	0.014	15	B	120	125
	Yogurt, plain, whole milk	grams	50	50	Day 3	Dinner - 6:30pm	30.5	1.735	2.33	0	2.33	1.625	1.048	6.5	60.5	0.025	6	77.5	23	13.5	0.25	0	0.03	0.014	0.071	0.038	3.5	0	3.5	3.5	0.016	0.185	0.032	0.014	15	B	120	125
	Yogurt, vanilla, lemon, or coffee flavor, NS as to type of milk	grams	120	120	Day 1	Breakfast - 8:30am	102	5.916	16.6	0	16.6	1.5	0.967	6	205.2	0.084	19.2	262.8	79.2	14.4	0.96	0	0.024	0.05	0.241	0.128	13.2	0	13.2	13.2	0.054	0.636	0.03	0.012	15	A	120	125
	Yogurt, plain, whole milk	grams	175	175	Day 3	Breakfast - 6:45am	106.8	6.072	8.155	0	8.155	5.688	3.668	22.8	211.8	0.088	21	271.2	80.5	47.2	0.875	0	0.105	0.051	0.248	0.131	12.2	0	12.2	12.2	0.056	0.648	0.114	0.047	15	B	120	125
	Dannon Oikos - Greek Yogurt - Orange Cream	grams	100	100	Day 1	Breakfast - 8:30am	100	7.333	10	0	8.667	3.333	2	6.667	100	0	0	93.3	33.3	13	0	1.5	0	0	0	0	0	0	0	0	0.063	0.48	0	0	15	A	120	125
	No Name - Stringable Mozzerella Cheese	2 stricks (42g)	0.5	21	Day 1	Dinner - 4:48pm	60	5.5	0	0	0	4	3.27	18.69	120.75	0	0	15.75	149.1	0	0	0.105	0	0	0.0567	0.0197	0	0	0	0	0.013	0.1533	0	0	14	C	120	125
	No Name - Extra Old Cheddar Cheese (White - 31% M.F./M.g. - 39% Moisture)	1 serving (30g)	1	30	Day 3	Lunch - 1:00pm	120	7	0	0	0	10	6	25	200	0	0	15.2	240	0	0	0.04	0	0	0.0868	0.0078	0	0	0	0	0.00735	0.176	0	0	14	D	120	125
	No Name - Extra Old Cheddar Cheese (White - 31% M.F./M.g. - 39% Moisture)	grams	20	20	Day 2	Breakfast - 9:00am	80	4.667	0	0	0	6.667	4	16.7	133.3	0	0	22.8	160	0	0	0.06	0	0	0.1302	0.0117	0	0	0	0	0.049	0.264	0	0	14	D	120	125
	Yogurt, vanilla, lemon, or coffee flavor, NS as to type of milk	1 cup (8 fl oz) (245g)	0.5	122.5	Day 3	Breakfast - 9:00am	104.1	6.039	16.9	0	16.9	1.531	0.987	6.125	209.5	0.086	19.6	268.3	80.8	14.7	0.98	0	0.024	0.051	0.246	0.131	13.5	0	13.5	13.5	0.055	0.649	0.031	0.012	15	B	120	125
	Dannon Oikos - Greek Yogurt, Grapefruit Swirl	1/2 cup (100g)	1	100	Day 1	Lunch - 2:00pm	90	8	11	0	8.667	2	1	10	80	0	0	93.3	30	13	0	1.5	0	0	0	0	0	0	0	0	0.063	0.48	0	0	15	A	120	125
	Dannon Oikos - Greek Yogurt, Grapefruit Swirl	1/2 cup (100g)	1	100	Day 3	Breakfast - 7:00am	90	8	11	0	8.667	2	1	10	80	0	0	93.3	30	13	0	1.5	0	0	0	0	0	0	0	0	0.063	0.48	0	0	15	A	120	125
	Liberte - Greek Wild Blueberry 0% Yogurt	grams	175	175	Day 2	Snack 1 - 10:30am	147	14	33.2	1.75	19.2	0	0	0	175	0	0	257.25	52.5	0	2.1	0	0	0	0.316667	0	0	0	0	0	0	0.314583	0	0	15	A	120	125
	President's Choice - Creamy Stirred Vanilla Yogurt 1.5% Mf.	1 cup (245g)	0.5	122.5	Day 3	Breakfast - 7:00am	100	4	18.5	0	12.5	1.499	1	6.5	100	0	18.056	0	50	24.4	0.976	2.745	0.036708	0.0534425	0.1464	0.139274	13.4416	0	13.4416	13.4416	0.0599204	0.2928	0.0377876	0.0156549	15	B	120	125
	President's Choice - Creamy Stirred Yogurt - Strawberry	grams	100	100	Day 3	Lunch - 12:15pm	91.4	3.429	16	0	12	1.714	1.143	5.714	85.7	0	14.8	0	42.9	20	0.8	2.25	0.0300885	0.0438053	0.12	0.114159	11.0177	0	11.0177	11.0177	0.049115	0.24	0.0309735	0.0128319	15	B	120	125
	Liberte - 2% Plain Greek Yogurt	1 serving (175g)	1	175	Day 1	Lunch - 12:30pm	120	16	6.001	1.8	6	4.001	3	15	200	0	25	434	65	20	1.2	1.5	0	0.079	0.242	0	0	0	0	0	0.073	0.61	0	0	15	A	120	125
	Liberte - 2% Plain Greek Yogurt	1 serving (175g)	1	175	Day 3	Breakfast - 10:00am	120	16	6.001	1.8	6	4.001	3	15	200	0	25	434	65	20	1.2	1.5	0	0.079	0.242	0	0	0	0	0	0.073	0.61	0	0	15	A	120	125
	Liberte - 2% Plain Greek Yogurt	grams	30	30	Day 3	Breakfast - 7:00am	20.6	2.743	1.029	0.310345	1.03448	0.686	0.514	2.571	34.3	0	4.31034	74.4	11.1	3.44828	0.206897	0.258621	0	0.0136207	0.0417241	0	0	0	0	0	0.0125862	0.105172	0	0	15	A	120	125
	Astro Biobest - Probiotic Yogurt	1 serving (100g)	1	100	Day 2	Dinner - 5:45pm	90	3	18	0	14	1	1	5	100	0	17.6	233.982	55	80	0	6	0.0300885	0.0438053	0.192	0.114159	11.0177	0	11.0177	11.0177	0.049115	0.384	0.0309735	0.0128319	15	B	120	125
	Astro Biobest - Probiotic Yogurt	grams	75	75	Day 3	Lunch - 12:15pm	67.5	2.25	13.5	0	10.5	0.75	0.75	3.75	75	0	13.2	176.267	41.2	60	0	4.5	0.0226667	0.033	0.144	0.086	8.3	0	8.3	8.3	0.037	0.288	0.0233333	0.00966667	15	B	120	125
	Astro Biobest - Probiotic Yogurt	1 serving (100g)	0.5	50	Day 3	Breakfast - 8:30am	45	1.5	9	0	7	0.5	0.5	2.5	50	0	8.8	117.511	27.5	40	0	3	0.0151111	0.022	0.096	0.0573333	5.53333	0	5.53333	5.53333	0.0246667	0.192	0.0155556	0.00644444	15	B	120	125
	Danone Activia - Yogurt (3.2% Fat)	grams	105	105	Day 1	Snack 2 - 10:30pm	84	4.2	10.8	0	10.8	3	2.1	15	110.4	0	11.4	213.443	48	37.1803	0.688525	1.5	0.082623	0.0385574	0.195541	0.104656	9.63934	0	9.63934	9.63934	0.0440656	0.509508	0.0881311	0.0385574	15	B	120	125
	Danone Activia - Yogurt (3.2% Fat)	grams	80	80	Day 2	Breakfast - 8:15am	64	3.2	8.229	0	8.229	2.286	1.6	11.4	84.1	0	8.686	162.623	36.6	28.3279	0.52459	1.143	0.0629508	0.029377	0.148984	0.0797377	7.34426	0	7.34426	7.34426	0.0335738	0.388197	0.0671475	0.029377	15	B	120	125
	Danone Activia - Yogurt (3.2% Fat)	grams	75	75	Day 1	Breakfast - 8:00am	60	3	7.715	0	7.715	2.143	1.5	10.7	78.9	0	8.143	152.459	34.3	26.5574	0.491803	1.072	0.0590164	0.027541	0.139672	0.0747541	6.88525	0	6.88525	6.88525	0.0314754	0.363934	0.0629508	0.027541	15	B	120	125
	Greek 0% Lactose Free Yogurt - Plain - Liberte	grams	180	180	Day 2	Lunch - 1:15pm	103	19.055	6.35716	0	6.35716	0.0721	0	0	127.205	0	0	267.8	69.937	0	0	0	0	0	0.326304	0	0	0	0	0	0	0.32445	0	0	15	A	120	125
	Activia - 0% Peach Yogurt	grams	180	180	Day 2	Lunch - 12:00pm	90	7.2	16.2	0	10.8	0	0	0	180	0	26.6	338.4	99	108	0	4.05	0.055	0.0814	0.173	0.209	20.086	0	20.086	20.086	0.0902	0.43	0.0572	0.0242	15	B	120	125
	Activia - 0% Peach Yogurt	grams	180	180	Day 3	Lunch - 12:45pm	90	7.2	16.2	0	10.8	0	0	0	180	0	26.6	338.4	99	108	0	4.05	0.055	0.0814	0.173	0.209	20.086	0	20.086	20.086	0.0902	0.43	0.0572	0.0242	15	B	120	125
	Astro Biobest - Probiotic Yogurt	grams	125	125	Day 3	Breakfast - 7:30am	112.5	3.75	22.5	0	17.5	1.25	1.25	6.25	125	0	22	293.778	68.8	100	0	7.5	0.0377778	0.055	0.24	0.143333	13.8333	0	13.8333	13.8333	0.0616667	0.48	0.0388889	0.0161111	15	B	120	125
	Kirkland Signature - Greek Yogurt Plain	1 cup (227g)	0.5	113.5	Day 2	Lunch - 11:00am	65	11.5	5	0.501	3.5	0	17.7	5	125	0.583	0	155	47.5	0	1.945	0	0	0	0.867312	0	0	0	0	0	0	0.861969	0	0	15	A	120	125
	Astro Biobest - Probiotic Yogurt	1 serving (100g)	1	100	Day 2	Breakfast - 10:30am	90	3	18	0	14	1	1	5	100	0.0800885	16.9912	233.982	55	13.9823	0.8	0	0.0300885	0.0438053	0.214159	0.114159	11.0177	0	11.0177	11.0177	0.049115	0.560177	0.0309735	0.0128319	15	B	120	125
	Greek 0% Lactose Free Yogurt - Plain - Liberte	1 ounce (28.35g)	2	56.7	Day 2	Breakfast - 10:30am	32.4	6	2	0	2	0	0	0	40	0	0	82.32	22	0	0	0	0	0	0.103	0	0	0	0	0	0	0.102	0	0	15	A	120	125
	President's Choice - Creamy Stirred Vanilla Yogurt 1.5% Mf.	grams	70	70	Day 2	Lunch - 2:15pm	57.1	2.286	10.6	0	7.143	0.857	0.571	3.714	57.1	0.0491429	11.2	153.314	28.6	8.4	0.56	0	0.0137143	0.0291429	0.140571	0.0748571	7.71429	0	7.71429	7.71429	0.0314286	0.370857	0.0177143	0.00685714	15	B	120	125
	Dannon Oikos - Chocolate on Top Greek Yogurt (Raspberry Truffle)	1 container (141g)	1	141	Day 1	Breakfast - 9:00am	170	11	21	0	16	5	3	15	100	0.36	0	135	90	18.2	0	2.1	0	0	0	0	0	0	0	0	0.0882	0.672	0	0	15	A	120	125
	Greek Yogurt 0% MF Plain	grams	116	116	Day 2	Lunch - 12:45pm	66.3	11.9	3.978	0	3.70969	0	0	6.628	132.6	0.716	0	163.1	46.4	0	0	0	0	0	0	0	0	0	0	0	0	0	0	0	15	A	120	125
	Pc - Creamy Stirred Yogurt Vanilla	grams	100	100	Day 3	Breakfast - 7:00am	85.7	3.429	16	0	10.9	1.714	1.143	5.714	85.7	0.0702041	16	219.02	42.9	12	0.8	0	0.0195918	0.0416327	0.200816	0.106939	11.0204	0	11.0204	11.0204	0.044898	0.529796	0.0253061	0.00979592	15	B	120	125
	Pc (President's Choice) - Creamy Raspberry Yogurt	1 serving (100g)	1	100	Day 2	Lunch - 1:00pm	90	3	16	0	12	2	1	10	100	0.0702041	16	219.02	50	12	0.8	0	0.0195918	0.0416327	0.200816	0.106939	11.0204	0	11.0204	11.0204	0.044898	0.529796	0.0253061	0.00979592	15	B	120	125
	Yogurt, plain, NS as to type of milk	grams	60	60	Day 2	Breakfast - 6:30-7:30am	37.8	3.15	4.224	0	4.224	0.93	0.6	3.6	109.8	0.048	10.2	140.4	42	8.4	0.48	0	0.018	0.026	0.128	0.068	6.6	0	6.6	6.6	0.029	0.336	0.019	0.008	15	B	120	125
	Yogurt, plain, NS as to type of milk	grams	45	45	Day 1	Breakfast - 6:30-7am	28.4	2.362	3.168	0	3.168	0.697	0.45	2.7	82.4	0.036	7.65	105.3	31.5	6.3	0.36	0	0.013	0.02	0.096	0.051	4.95	0	4.95	4.95	0.022	0.252	0.014	0.006	15	B	120	125
	Astro Biobest - Probiotic Yogurt	grams	160	160	Day 2	Lunch - 12:00pm	144	4.8	28.8	0	22.4	1.6	1.6	8	160	0.128142	27.1858	374.372	88	22.3717	1.28	0	0.0481416	0.0700885	0.342655	0.182655	17.6283	0	17.6283	17.6283	0.0785841	0.896283	0.0495575	0.020531	15	B	120	125
	Astro Biobest - Probiotic Yogurt	1 serving (100g)	1	100	Day 3	Lunch - 12:15pm	90	3	18	0	14	1	1	5	100	0.00390272	0.82798	11.402	55	0.681359	0.0389841	0	0.00146622	0.00213464	0.010436	0.00556299	0.536893	0	0.536893	0.536893	0.00239338	0.0272975	0.00150934	0.000625298	15	B	120	125
	Astro Biobest - Probiotic Yogurt	grams	75	75	Day 2	Breakfast - 8:00am	67.5	2.25	13.5	0	10.5	0.75	0.75	3.75	75	0.0600664	12.7434	175.487	41.2	10.4867	0.6	0	0.0225664	0.032854	0.160619	0.0856195	8.26327	0	8.26327	8.26327	0.0368363	0.420133	0.0232301	0.00962389	15	B	120	125
	Astro Biobest - Probiotic Yogurt	grams	75	75	Day 1	Breakfast - 6:15am	67.5	2.25	13.5	0	10.5	0.75	0.75	3.75	75	0.0600664	12.7434	175.487	41.2	10.4867	0.6	0	0.0225664	0.032854	0.160619	0.0856195	8.26327	0	8.26327	8.26327	0.0368363	0.420133	0.0232301	0.00962389	15	B	120	125
	Astro Biobest - Probiotic Yogurt	grams	75	75	Day 3	Breakfast - 8:00am	67.5	2.25	13.5	0	10.5	0.75	0.75	3.75	75	0.00882015	1.87124	25.7685	41.2	1.53987	0.088104	0	0.00331365	0.00482428	0.0235854	0.0125724	1.21338	0	1.21338	1.21338	0.00540904	0.0616923	0.00341111	0.00141317	15	B	120	125
	Genuine Health - Fermented Greek Yogurt Proteins+, Pineapple Coconut	grams	57	57	Day 1	Snack 2 - 8:00pm	196.9	15.5	25.9	13.5	8.291	6.218	4.146	10.4	155.5	0.746	50.16	98.5	90	2.28	0.4275	0	0.0057	0.147915	0.62928	0.35853	3.42	0	3.42	3.42	0.16644	0.67545	0.007125	0.002565	15	B	120	125
	Activia - Grapefruit and Orange Yogurt	1 serving (100g)	2	200	Day 2	Lunch - 2:30pm	200	8	30	4	20	6	4	20	200	0.373333	24	310	120	0	0	0.075	0.12	0.056	0.284	0.152	14	0	14	14	0.064	0.74	0.128	0.056	15	B	120	125
	Activia - Grapefruit and Orange Yogurt	1 serving (100g)	1	100	Day 1	Lunch - 1:30pm	100	4	15	0.2	10	3	0.2	10	100	0.0186667	12	155	6	0	0	0.0375	0.06	0.028	0.142	0.076	7	0	7	7	0.032	0.37	0.064	0.028	15	B	120	125
	Astro Biobest - Probiotic Yogurt	grams	250	250	Day 1	Breakfast - 7:30am	225	7.5	45	0	35	2.5	2.5	12.5	250	0.200221	42.4779	584.956	137.5	34.9558	2	0	0.0752212	0.109513	0.535398	0.285398	27.5442	0	27.5442	27.5442	0.122788	1.40044	0.0774336	0.0320796	15	B	120	125
	Astro Biobest - Probiotic Yogurt	1 serving (100g)	1	100	Day 2	Breakfast - 7:00am	90	3	18	0	14	1	1	5	100	0.0885935	18.7955	258.83	55	15.4671	0.884956	0	0.0332837	0.0484572	0.236902	0.126282	12.1877	0	12.1877	12.1877	0.0543308	0.619665	0.0342627	0.0141945	15	B	120	125
	Astro Biobest - Probiotic Yogurt	1 serving (100g)	1	100	Day 3	Breakfast - 7:30am	90	3	18	0	14	1	1	5	100	0.0885935	18.7955	258.83	55	15.4671	0.884956	0	0.0332837	0.0484572	0.236902	0.126282	12.1877	0	12.1877	12.1877	0.0543308	0.619665	0.0342627	0.0141945	15	B	120	125
	Kirkland Signature - Greek Yogurt Plain	1 cup (227g)	0.5	113.5	Day 2	Breakfast - 9:30AM	65	11.5	5	0.501	3.5	0	17.7	5	125	0.583	0	155	47.5	0	1.945	0	0	0	0	0	0	0	0	0	0	0	0	0	15	A	120	125
	Kirkland Signature - Greek Yogurt Plain	1 cup (227g)	0.5	113.5	Day 3	Breakfast - 7:30AM	65	11.5	5	0.501	3.5	0	17.7	5	125	0.583	0	155	47.5	0	1.945	0	0	0	0	0	0	0	0	0	0	0	0	0	15	A	120	125
	Egg, cheese, and sausage griddle cake sandwich	1 sandwich (199g)	2	398	Day 2	Breakfast - 7:00am	1158	42.9	87.7	2.388	31.4	70.6	22.5	525.4	382.1	6.01	55.7	581.1	2595	230.8	0	0	2.189	0.677	1.154	8.402	207	99.5	107.5	278.6	0.509	2.109	7.88	0.561	218	A	10	126
	Egg, cheese, and sausage griddle cake sandwich	1 sandwich (199g)	2	398	Day 3	Breakfast - 7:00am	1158	42.9	87.7	2.388	31.4	70.6	22.5	525.4	382.1	6.01	55.7	581.1	2595	230.8	0	0	2.189	0.677	1.154	8.402	207	99.5	107.5	278.6	0.509	2.109	7.88	0.561	218	A	10	126
	Egg, white only, raw	1 cup (243g)	0.188	45.68	Day 2	Lunch - 2:00pm	21.9	4.98	0.333	0	0.324	0.078	0	0	3.198	0.037	5.025	74.5	75.8	0	0	0	0	0.002	0.201	0.048	1.827	0	1.827	1.827	0.002	0.041	0	0	16	A	120	126
	Egg, white only, raw	1 cup (243g)	0.188	45.68	Day 3	Breakfast - 9:30am	21.9	4.98	0.333	0	0.324	0.078	0	0	3.198	0.037	5.025	74.5	75.8	0	0	0	0	0.002	0.201	0.048	1.827	0	1.827	1.827	0.002	0.041	0	0	16	A	120	126
	Egg, Whole, fried	1 large (46g)	1	46	Day 2	Lunch - 2:00pm	90.2	6.261	0.382	0	0.184	6.826	1.989	184.5	28.5	0.869	5.98	69.9	95.2	100.7	0	1.012	0.603	0.02	0.228	0.038	23.5	0	23.5	23.5	0.085	0.446	1.279	0.063	16	A	120	126
	Egg, Whole, fried	1 large (46g)	1	46	Day 3	Breakfast - 9:30am	90.2	6.261	0.382	0	0.184	6.826	1.989	184.5	28.5	0.869	5.98	69.9	95.2	100.7	0	1.012	0.603	0.02	0.228	0.038	23.5	0	23.5	23.5	0.085	0.446	1.279	0.063	16	A	120	126
	Egg, white only, raw	1 large egg white (33g)	1	33	Day 1	Dinner - 6:30pm	15.8	3.597	0.241	0	0.234	0.056	0	0	2.31	0.026	3.63	53.8	54.8	0	0	0	0	0.001	0.145	0.035	1.32	0	1.32	1.32	0.002	0.03	0	0	16	A	120	126
	Egg, whole, boiled	1 large (50g)	3	150	Day 3	Lunch - 12:30pm	231	18.8	1.68	0	1.68	15.9	4.881	633	75	1.785	15	189	417	252	0	1.534	1.545	0.099	0.766	0.096	66	0	66	66	0.182	1.665	1.774	0.053	16	A	120	126
	Egg, whole, fried - scrambled egg, no milk added	1 small (35g)	1.5	52.5	Day 1	Dinner - 6:30pm	99.7	7.119	0.452	0	0.436	7.765	2.156	239.4	29.9	1.04	6.825	76.1	279.8	100.8	0	1.159	0.787	0.034	0.258	0.038	19.9	0	19.9	19.9	0.077	0.625	1.241	0.073	16	A	120	126
	Egg, Whole, fried	grams	50	50	Day 3	Lunch - 12:45pm	98	6.805	0.415	0	0.2	7.42	2.162	200.5	31	0.945	6.5	76	103.5	109.5	0	1.1	0.655	0.022	0.248	0.041	25.5	0	25.5	25.5	0.092	0.485	1.39	0.068	16	A	120	126
	Egg, Whole, fried	grams	42	42	Day 1	Dinner - 6:00pm	82.3	5.716	0.349	0	0.168	6.233	1.816	168.4	26	0.794	5.46	63.8	86.9	92	0	0.924	0.55	0.018	0.208	0.034	21.4	0	21.4	21.4	0.077	0.407	1.168	0.058	16	A	120	126
	Egg, whole, boiled	1 medium (44g)	1	44	Day 2	Dinner	67.8	5.513	0.493	0	0.493	4.651	1.432	185.7	22	0.524	4.4	55.4	122.3	73.9	0	1.534	0.453	0.029	0.225	0.028	19.4	0	19.4	19.4	0.053	0.488	0.521	0.015	16	A	120	126
	Egg, chicken, whole, boiled in shell, hard-cooked / Oeuf, poule, entier, bouilli à la coque, dur	50g (50g)	2	100	Day 2	Snack 1 - 11:30am	141	11.8	1.85	0	0.77	10	3.043	365.8	44.8	1.387	8.702	113.7	125.5	191.2	0	1.44	2.447	0.06	0.47	0.111	54.2	0	54.2	54.2	0.068	1.616	1.109	0.073	16	A	120	126
	Egg, chicken, whole, boiled in shell, hard-cooked / Oeuf, poule, entier, bouilli à la coque, dur	50g (50g)	2	100	Day 3	Snack 1 - 10:00am	141	11.8	1.85	0	0.77	10	3.043	365.8	44.8	1.387	8.702	113.7	125.5	191.2	0	1.44	2.447	0.06	0.47	0.111	54.2	0	54.2	54.2	0.068	1.616	1.109	0.073	16	A	120	126
	Egg, white only, cooked	1 egg white, NS as to size (33g)	2	66	Day 2	Breakfast - 10:00am	31.7	7.168	0.482	0	0.469	0.112	0	0	4.62	0.053	7.26	106.9	211.2	0	0	0	0	0.002	0.274	0.065	1.98	0	1.98	1.98	0.003	0.053	0	0	16	A	120	126
	Egg, white only, cooked	1 egg white, NS as to size (33g)	2	66	Day 3	Breakfast - 6:00am	31.7	7.168	0.482	0	0.469	0.112	0	0	4.62	0.053	7.26	106.9	211.2	0	0	0	0	0.002	0.274	0.065	1.98	0	1.98	1.98	0.003	0.053	0	0	16	A	120	126
	Egg, chicken, whole, scrambled or omelet / Oeuf, poule, entier, brouillé ou omelette	grams	105	105	Day 3	Breakfast - 8:50am	160.6	10.9	3.199	0	2.271	12	3.478	307.6	75.2	1.169	10.8	143.7	387.6	216.6	0.059	2.01	2.624	0.062	0.452	0.122	46.6	0	46.6	46.6	0.068	1.468	1.73	0.249	16	A	120	126
	Egg, chicken, whole, scrambled or omelet / Oeuf, poule, entier, brouillé ou omelette	1 large egg / 1 gros oeuf (61g)	2	122	Day 2	Breakfast - 8:30am	186.7	12.7	3.717	0	2.639	13.9	4.041	357.4	87.4	1.358	12.6	167	450.4	251.6	0.068	2.34	3.049	0.072	0.525	0.142	54.1	0	54.1	54.1	0.079	1.706	2.011	0.289	16	A	120	126
	Egg, chicken, whole, fresh or frozen, raw / Oeuf, poule, entier, frais ou congelé, cru	1 medium egg / 1 oeuf moyen (46.39g)	0.25	11.6	Day 2	Dinner - 6:00pm	16.8	1.368	0.114	0	0.089	1.161	0.353	42.4	5.198	0.161	1.009	13.2	14.5	22.2	0	0.17	0.284	0.008	0.057	0.014	8.381	0	8.381	8.381	0.008	0.22	0.129	0.008	16	A	120	126
	Egg, chicken, whole, fried / Oeuf, poule, entier, frit	1 large egg / 1 gros oeuf (46g)	1	46	Day 1	Breakfast - 9:15am	88.8	5.921	0.509	0	0.386	6.813	1.844	183.4	22.6	0.53	4.387	57.4	151.4	114.2	0.002	1.02	1.572	0.03	0.236	0.056	27.2	0	27.2	27.2	0.035	0.812	1.04	0.149	16	A	120	126
	Egg, chicken, whole, fried / Oeuf, poule, entier, frit	1 large egg / 1 gros oeuf (46g)	1	46	Day 2	Breakfast - 7:00am	88.8	5.921	0.509	0	0.386	6.813	1.844	183.4	22.6	0.53	4.387	57.4	151.4	114.2	0.002	1.02	1.572	0.03	0.236	0.056	27.2	0	27.2	27.2	0.035	0.812	1.04	0.149	16	A	120	126
	Egg, chicken, whole, scrambled or omelet / Oeuf, poule, entier, brouillé ou omelette	1 large egg / 1 gros oeuf (61g)	1	61	Day 3	Breakfast - 7:30am	93.3	6.337	1.859	0	1.319	6.95	2.02	178.7	43.7	0.679	6.294	83.5	225.2	125.8	0.034	1.17	1.524	0.036	0.262	0.071	27.1	0	27.1	27.1	0.04	0.853	1.005	0.145	16	A	120	126
	Egg, chicken, whole, fried / Oeuf, poule, entier, frit	1 large egg / 1 gros oeuf (46g)	1	46	Day 1	Breakfast - 9:15am	88.8	5.921	0.509	0	0.386	6.813	1.844	183.4	22.6	0.53	4.387	57.4	151.4	114.2	0.002	1.02	1.572	0.03	0.236	0.056	27.2	0	27.2	27.2	0.035	0.812	1.04	0.149	16	A	120	126
	Egg, chicken, whole, fried / Oeuf, poule, entier, frit	1 large egg / 1 gros oeuf (46g)	1	46	Day 1	Breakfast - 10:00am	88.8	5.921	0.509	0	0.386	6.813	1.844	183.4	22.6	0.53	4.387	57.4	151.4	114.2	0.002	1.02	1.572	0.03	0.236	0.056	27.2	0	27.2	27.2	0.035	0.812	1.04	0.149	16	A	120	126
	Egg, chicken, whole, fried / Oeuf, poule, entier, frit	1 large egg / 1 gros oeuf (46g)	1	46	Day 2	Breakfast - 9:00am	88.8	5.921	0.509	0	0.386	6.813	1.844	183.4	22.6	0.53	4.387	57.4	151.4	114.2	0.002	1.02	1.572	0.03	0.236	0.056	27.2	0	27.2	27.2	0.035	0.812	1.04	0.149	16	A	120	126
	Egg, whole, baked, NS as to fat added in cooking	1 large (59g)	2	118	Day 3	Breakfast - 10:00am	251.3	15	1.003	0	0.92	20.9	5.406	505	63.7	2.195	14.2	161.7	457.8	259.6	0	1.534	2.171	0.067	0.546	0.078	42.5	0	42.5	42.5	0.163	1.239	3.868	0.268	16	A	120	126
	Egg omelet or scrambled egg, with onions, peppers, tomatoes, and mushrooms - Spanish omelet	1 cup (228g)	1.5	342	Day 3	Breakfast - 8:15am	403.6	19.1	13.1	2.736	8.618	31.7	7.849	513	143.6	2.804	37.6	629.3	786.6	410.4	37.3	4.788	3.762	0.174	0.787	1.724	65	0	65	65	0.397	1.539	6.614	0.527	218	A	120	126
	Egg, chicken, whole, fried / Oeuf, poule, entier, frit	1 large egg / 1 gros oeuf (46g)	1	46	Day 1	Dinner - 6:20pm	88.8	5.921	0.509	0	0.386	6.813	1.844	183.4	22.6	0.53	4.387	57.4	151.4	114.2	0.002	1.02	1.572	0.03	0.236	0.056	27.2	0	27.2	27.2	0.035	0.812	1.04	0.149	16	A	120	126
	Egg omelet or scrambled egg, with ham or bacon	1 medium egg (69g)	2	138	Day 3	Breakfast	251.2	19.6	2.001	0	2.111	18.1	5.773	346.4	77.3	1.753	20.7	267.7	890.1	147.7	0	2.484	1.214	0.31	0.491	1.98	29	0	29	29	0.275	1.214	2.334	0.179	218	A	120	126
	Egg, chicken, whole, fried / Oeuf, poule, entier, frit	grams	91	91	Day 1	Lunch - 12:45pm	175.6	11.7	1.006	0	0.763	13.5	3.647	362.8	44.7	1.049	8.679	113.6	299.5	225.9	0.005	2.01	3.109	0.06	0.467	0.11	53.8	0	53.8	53.8	0.068	1.606	2.058	0.295	16	A	120	126
	Egg, chicken, whole, fried / Oeuf, poule, entier, frit	grams	98	98	Day 3	Lunch - 12:15pm	189.1	12.6	1.084	0	0.822	14.5	3.928	390.7	48.1	1.13	9.346	122.3	322.5	243.2	0.005	2.34	3.349	0.065	0.503	0.119	57.9	0	57.9	57.9	0.074	1.73	2.216	0.318	16	A	120	126
	Egg, chicken, whole, poached / Oeuf, poule, entier, poché	1 ounce (28.35g)	2	56.7	Day 2	Breakfast - 8:30am	81.6	6.665	0.554	0	0.435	5.655	1.719	206.6	25.4	0.784	4.917	64.3	154	108	0	0.81	1.382	0.032	0.238	0.056	30.6	0	30.6	30.6	0.035	0.859	0.627	0.041	16	A	120	126
	Egg, chicken, whole, poached / Oeuf, poule, entier, poché	grams	125	125	Day 1	Breakfast - 8:30am	180	14.7	1.221	0	0.959	12.5	3.789	455.5	55.9	1.729	10.8	141.7	339.5	238.1	0	1.79	3.046	0.071	0.524	0.124	67.5	0	67.4	67.4	0.076	1.894	1.381	0.09	16	A	120	126
	Egg, chicken, whole, poached / Oeuf, poule, entier, poché	grams	110	110	Day 3	Breakfast - 8:30am	158.4	12.9	1.075	0	0.844	11	3.334	400.9	49.2	1.521	9.539	124.7	298.7	209.5	0	1.79	2.681	0.063	0.461	0.109	59.4	0	59.3	59.3	0.067	1.666	1.216	0.079	16	A	120	126
	Egg, chicken, whole, fresh or frozen, raw / Oeuf, poule, entier, frais ou congelé, cru	1 medium egg / 1 oeuf moyen (46.39g)	0.125	5.8	Day 1	Lunch - 2:08pm	8.408	0.684	0.057	0	0.045	0.581	0.176	21.2	2.599	0.08	0.505	6.596	7.275	11.1	0	0.085	0.142	0.004	0.029	0.007	4.19	0	4.19	4.19	0.004	0.11	0.064	0.004	16	A	120	126
	Egg, chicken, whole, fresh or frozen, raw / Oeuf, poule, entier, frais ou congelé, cru	1 medium egg / 1 oeuf moyen (46.39g)	0.27	12.53	Day 1	Lunch - 2:08pm	18.2	1.478	0.123	0	0.096	1.254	0.381	45.8	5.613	0.174	1.09	14.2	15.7	23.9	0	0.18	0.306	0.009	0.062	0.015	9.051	0	9.051	9.051	0.009	0.238	0.139	0.009	16	A	120	126
	Egg, chicken, whole, fresh or frozen, raw / Oeuf, poule, entier, frais ou congelé, cru	grams	46	46	Day 2	Dinner - 6:49pm	66.7	5.428	0.451	0	0.354	4.606	1.4	168.3	20.6	0.638	4.003	52.3	57.7	87.9	0	0.66	1.125	0.033	0.228	0.054	33.2	0	33.2	33.2	0.033	0.874	0.51	0.033	16	A	120	126
	Egg, chicken, whole, fried / Oeuf, poule, entier, frit	1 large egg / 1 gros oeuf (46g)	1	46	Day 1	Dinner - 7:25pm	88.8	5.921	0.509	0	0.386	6.813	1.844	183.4	22.6	0.53	4.387	57.4	151.4	114.2	0.002	1.02	1.572	0.03	0.236	0.056	27.2	0	27.2	27.2	0.035	0.812	1.04	0.149	16	A	120	126
	Egg, chicken, whole, scrambled or omelet / Oeuf, poule, entier, brouillé ou omelette	1 large egg / 1 gros oeuf (61g)	4	244	Day 3	Dinner - 7:30pm	373.3	25.3	7.435	0	5.278	27.8	8.081	714.8	174.8	2.716	25.2	334	900.7	503.3	0.137	4.39	6.098	0.144	1.049	0.283	108.3	0	108.3	108.3	0.159	3.411	4.021	0.578	16	A	120	126
	Egg, chicken, whole, fried / Oeuf, poule, entier, frit	1 large egg / 1 gros oeuf (46g)	2	92	Day 2	Breakfast	177.6	11.8	1.018	0	0.772	13.6	3.687	366.8	45.2	1.061	8.774	114.8	302.7	228.3	0.005	2.04	3.144	0.061	0.472	0.111	54.4	0	54.4	54.4	0.069	1.624	2.08	0.298	16	A	120	126
	Egg, chicken, whole, fried / Oeuf, poule, entier, frit	grams	67	67	Day 1	Breakfast - 7:00am	129.3	8.624	0.741	0	0.562	9.923	2.685	267.1	32.9	0.773	6.39	83.6	220.5	166.3	0.003	1.48	2.289	0.044	0.344	0.081	39.6	0	39.6	39.6	0.05	1.183	1.515	0.217	16	A	120	126
	Egg, chicken, whole, fried / Oeuf, poule, entier, frit	grams	67	67	Day 2	Breakfast - 7:00am	129.3	8.624	0.741	0	0.562	9.923	2.685	267.1	32.9	0.773	6.39	83.6	220.5	166.3	0.003	1.48	2.289	0.044	0.344	0.081	39.6	0	39.6	39.6	0.05	1.183	1.515	0.217	16	A	120	126
	Egg, chicken, whole, fried / Oeuf, poule, entier, frit	1 large egg / 1 gros oeuf (46g)	4	184	Day 2	Lunch - 1:30pm	355.1	23.7	2.035	0	1.544	27.3	7.375	733.6	90.3	2.122	17.5	229.7	605.5	456.7	0.009	3.31	6.287	0.121	0.944	0.223	108.8	0	108.8	108.8	0.138	3.248	4.16	0.596	16	A	120	126
	Egg, chicken, whole, fried / Oeuf, poule, entier, frit	grams	44	44	Day 1	Breakfast - 6:30am	84.9	5.663	0.487	0	0.369	6.517	1.764	175.4	21.6	0.507	4.196	54.9	144.8	109.2	0.002	0.97	1.503	0.029	0.226	0.053	26	0	26	26	0.033	0.777	0.995	0.143	16	A	120	126
	Egg, chicken, whole, fried / Oeuf, poule, entier, frit	grams	44	44	Day 2	Breakfast - 6:30am	84.9	5.663	0.487	0	0.369	6.517	1.764	175.4	21.6	0.507	4.196	54.9	144.8	109.2	0.002	0.97	1.503	0.029	0.226	0.053	26	0	26	26	0.033	0.777	0.995	0.143	16	A	120	126
	Egg, chicken, whole, fried / Oeuf, poule, entier, frit	grams	44	44	Day 3	Breakfast - 6:30am	84.9	5.663	0.487	0	0.369	6.517	1.764	175.4	21.6	0.507	4.196	54.9	144.8	109.2	0.002	0.97	1.503	0.029	0.226	0.053	26	0	26	26	0.033	0.777	0.995	0.143	16	A	120	126
	Egg, chicken, whole, fried / Oeuf, poule, entier, frit	grams	49	49	Day 1	Breakfast - 11:30am	94.6	6.307	0.542	0	0.411	7.257	1.964	195.4	24.1	0.565	4.673	61.2	161.2	121.6	0.002	1.085	1.674	0.032	0.251	0.059	29	0	29	29	0.037	0.865	1.108	0.159	16	A	120	126
	Egg, chicken, whole, fried / Oeuf, poule, entier, frit	grams	48	48	Day 3	Breakfast - 10:45am	92.6	6.178	0.531	0	0.403	7.109	1.924	191.4	23.6	0.553	4.578	59.9	158	119.1	0.002	1.0625	1.64	0.032	0.246	0.058	28.4	0	28.4	28.4	0.036	0.847	1.085	0.156	16	A	120	126
	Egg, chicken, whole, fried / Oeuf, poule, entier, frit	grams	40	40	Day 2	Breakfast - 9:30am	77.2	5.148	0.442	0	0.336	5.924	1.603	159.5	19.6	0.461	3.815	49.9	131.6	99.3	0.002	0.885	1.367	0.026	0.205	0.048	23.6	0	23.6	23.6	0.03	0.706	0.904	0.13	16	A	120	126
	Egg, chicken, whole, poached / Oeuf, poule, entier, poché	1 ounce (28.35g)	1	28.35	Day 2	Breakfast - 9:00am	40.8	3.333	0.277	0	0.217	2.828	0.859	103.3	12.7	0.392	2.459	32.1	77	54	0	0.4075	0.691	0.016	0.119	0.028	15.3	0	15.3	15.3	0.017	0.43	0.313	0.02	16	A	120	126
	Egg, chicken, whole, fried / Oeuf, poule, entier, frit	grams	43	43	Day 2	Breakfast - 7:41am	83	5.535	0.476	0	0.361	6.369	1.723	171.4	21.1	0.496	4.101	53.7	141.5	106.7	0.002	0.9525	1.469	0.028	0.221	0.052	25.4	0	25.4	25.4	0.032	0.759	0.972	0.139	16	A	120	126
	Egg, chicken, whole, boiled in shell, hard-cooked / Oeuf, poule, entier, bouilli à la coque, dur	50g (50g)	0.5	25	Day 2	Dinner - 6:00pm	35.2	2.95	0.462	0	0.192	2.503	0.761	91.5	11.2	0.347	2.176	28.4	31.4	47.8	0	0.36	0.612	0.015	0.118	0.028	13.5	0	13.5	13.5	0.017	0.404	0.277	0.018	16	A	120	126
	Egg, chicken, whole, scrambled or omelet / Oeuf, poule, entier, brouillé ou omelette	1 large egg / 1 gros oeuf (61g)	1	61	Day 1	Breakfast - 9:30am	93.3	6.337	1.859	0	1.319	6.95	2.02	178.7	43.7	0.679	6.294	83.5	225.2	125.8	0.034	1.17	1.524	0.036	0.262	0.071	27.1	0	27.1	27.1	0.04	0.853	1.005	0.145	16	A	120	126
	Egg, chicken, whole, fried / Oeuf, poule, entier, frit	1 large egg / 1 gros oeuf (46g)	1	46	Day 1	Breakfast - 9:15am	88.8	5.921	0.509	0	0.386	6.813	1.844	183.4	22.6	0.53	4.387	57.4	151.4	114.2	0.002	1.0175	1.572	0.03	0.236	0.056	27.2	0	27.2	27.2	0.035	0.812	1.04	0.149	16	A	120	126
	Humpty's - Veggie Pan Scramblers	1 cup (100g)	5	500	Day 3	Breakfast - 8:00am	625	35	45	5	0	75	20	800	0	5	0	0	2180	0	0	0	0	0	0	0	0	0	0	0	0	0	0	0	218	A	120	126
	Egg, chicken, whole, scrambled or omelet / Oeuf, poule, entier, brouillé ou omelette	ounces	10	283.5	Day 3	Dinner - 8:00pm	433.8	29.4	8.638	0	6.132	32.3	9.39	830.5	203.1	3.155	29.3	388	1047	584.7	0.159	5.435	7.085	0.167	1.219	0.329	125.8	0	125.8	125.8	0.184	3.963	4.672	0.672	16	A	120	126
	Egg, chicken, whole, fried / Oeuf, poule, entier, frit	1 large egg / 1 gros oeuf (46g)	1	46	Day 2	Breakfast - 9:00am	88.8	5.921	0.509	0	0.386	6.813	1.844	183.4	22.6	0.53	4.387	57.4	151.4	114.2	0.002	1.0175	1.572	0.03	0.236	0.056	27.2	0	27.2	27.2	0.035	0.812	1.04	0.149	16	A	120	126
	Egg, chicken, whole, fried / Oeuf, poule, entier, frit	grams	100	100	Day 2	Dinner - 5:45pm	193	12.9	1.106	0	0.839	14.8	4.008	398.7	49.1	1.153	9.537	124.8	329.1	248.2	0.005	2.2125	3.417	0.066	0.513	0.121	59.1	0	59.1	59.1	0.075	1.765	2.261	0.324	16	A	120	126
	Egg, chicken, whole, fried / Oeuf, poule, entier, frit	1 large egg / 1 gros oeuf (46g)	1	46	Day 1	Breakfast - 9:00am	88.8	5.921	0.509	0	0.386	6.813	1.844	183.4	22.6	0.53	4.387	57.4	151.4	114.2	0.002	1.0175	1.572	0.03	0.236	0.056	27.2	0	27.2	27.2	0.035	0.812	1.04	0.149	16	A	120	126
	Egg, chicken, whole, fried / Oeuf, poule, entier, frit	1 large egg / 1 gros oeuf (46g)	1	46	Day 2	Breakfast - 8:00am	88.8	5.921	0.509	0	0.386	6.813	1.844	183.4	22.6	0.53	4.387	57.4	151.4	114.2	0.002	1.0175	1.572	0.03	0.236	0.056	27.2	0	27.2	27.2	0.035	0.812	1.04	0.149	16	A	120	126
	Egg, chicken, whole, boiled in shell, hard-cooked / Oeuf, poule, entier, bouilli à la coque, dur	50g (50g)	1	50	Day 2	Breakfast - 7:30am	70.5	5.9	0.925	0	0.385	5.006	1.522	182.9	22.4	0.694	4.351	56.9	62.7	95.6	0	0.72	1.224	0.03	0.235	0.056	27.1	0	27.1	27.1	0.034	0.808	0.554	0.036	16	A	120	126
	Egg, chicken, whole, fried / Oeuf, poule, entier, frit	1 large egg / 1 gros oeuf (46g)	1	46	Day 1	Breakfast - 7:30am	88.8	5.921	0.509	0	0.386	6.813	1.844	183.4	22.6	0.53	4.387	57.4	151.4	114.2	0.002	1.0175	1.572	0.03	0.236	0.056	27.2	0	27.2	27.2	0.035	0.812	1.04	0.149	16	A	120	126
	Egg, chicken, whole, fried / Oeuf, poule, entier, frit	1 large egg / 1 gros oeuf (46g)	1	46	Day 2	Breakfast - 7:00am	88.8	5.921	0.509	0	0.386	6.813	1.844	183.4	22.6	0.53	4.387	57.4	151.4	114.2	0.002	1.0175	1.572	0.03	0.236	0.056	27.2	0	27.2	27.2	0.035	0.812	1.04	0.149	16	A	120	126
	Egg, chicken, whole, fried / Oeuf, poule, entier, frit	grams	51	51	Day 1	Breakfast - 9:00am	98.4	6.564	0.564	0	0.428	7.554	2.044	203.3	25	0.588	4.864	63.7	167.8	126.6	0.003	1.1275	1.743	0.034	0.262	0.062	30.2	0	30.2	30.2	0.038	0.9	1.153	0.165	16	A	120	126
	Egg, chicken, whole, fried / Oeuf, poule, entier, frit	grams	50	50	Day 2	Breakfast - 6:00am	96.5	6.436	0.553	0	0.42	7.406	2.004	199.4	24.5	0.576	4.768	62.4	164.5	124.1	0.002	1.1075	1.708	0.033	0.256	0.06	29.6	0	29.6	29.6	0.038	0.882	1.13	0.162	16	A	120	126
	Egg, chicken, whole, fried / Oeuf, poule, entier, frit	grams	50	50	Day 3	Breakfast - 6:30am	96.5	6.436	0.553	0	0.42	7.406	2.004	199.4	24.5	0.576	4.768	62.4	164.5	124.1	0.002	1.1075	1.708	0.033	0.256	0.06	29.6	0	29.6	29.6	0.038	0.882	1.13	0.162	16	A	120	126
	Egg, chicken, whole, fresh or frozen, raw / Oeuf, poule, entier, frais ou congelé, cru	1 medium egg / 1 oeuf moyen (46.39g)	0.091	4.22	Day 3	Lunch	6.114	0.498	0.041	0	0.032	0.422	0.128	15.4	1.89	0.059	0.367	4.796	5.29	8.062	0	0.060675	0.103	0.003	0.021	0.005	3.047	0	3.047	3.047	0.003	0.08	0.047	0.003	16	A	120	126
	Egg, chicken, whole, fresh or frozen, raw / Oeuf, poule, entier, frais ou congelé, cru	1 medium egg / 1 oeuf moyen (46.39g)	2	92.78	Day 3	Breakfast - 11:30am	134.5	10.9	0.91	0	0.714	9.289	2.823	339.4	41.6	1.287	8.073	105.5	116.4	177.4	0	1.335	2.27	0.066	0.459	0.108	67	0	67	67	0.067	1.764	1.029	0.067	16	A	120	126
	Egg, chicken, whole, fried / Oeuf, poule, entier, frit	1 large egg / 1 gros oeuf (46g)	1	46	Day 1	Dinner - 6:30pm	88.8	5.921	0.509	0	0.386	6.813	1.844	183.4	22.6	0.53	4.387	57.4	151.4	114.2	0.002	1.0175	1.572	0.03	0.236	0.056	27.2	0	27.2	27.2	0.035	0.812	1.04	0.149	16	A	120	126
	Egg, chicken, whole, fried / Oeuf, poule, entier, frit	1 large egg / 1 gros oeuf (46g)	1	46	Day 2	Lunch - 2:15pm	88.8	5.921	0.509	0	0.386	6.813	1.844	183.4	22.6	0.53	4.387	57.4	151.4	114.2	0.002	1.0175	1.572	0.03	0.236	0.056	27.2	0	27.2	27.2	0.035	0.812	1.04	0.149	16	A	120	126
	Egg, chicken, whole, fried / Oeuf, poule, entier, frit	1 large egg / 1 gros oeuf (46g)	2	92	Day 3	Breakfast	177.6	11.8	1.018	0	0.772	13.6	3.687	366.8	45.2	1.061	8.774	114.8	302.7	228.3	0.005	2.035	3.144	0.061	0.472	0.111	54.4	0	54.4	54.4	0.069	1.624	2.08	0.298	16	A	120	126
	Egg, chicken, whole, fried / Oeuf, poule, entier, frit	grams	43	43	Day 2	Breakfast - 7:41am	83	5.535	0.476	0	0.361	6.369	1.723	171.4	21.1	0.496	4.101	53.7	141.5	106.7	0.002	0.9525	1.469	0.028	0.221	0.052	25.4	0	25.4	25.4	0.032	0.759	0.972	0.139	16	A	120	126
	Egg, chicken, whole, fried / Oeuf, poule, entier, frit	1 large egg / 1 gros oeuf (46g)	1	46	Day 3	Breakfast - 7:00am	88.8	5.921	0.509	0	0.386	6.813	1.844	183.4	22.6	0.53	4.387	57.4	151.4	114.2	0.002	1.0175	1.572	0.03	0.236	0.056	27.2	0	27.2	27.2	0.035	0.812	1.04	0.149	16	A	120	126
	Egg, white only, cooked	1 large egg white (33g)	2	66	Day 2	Breakfast - 7:00am	31.7	7.168	0.482	0	0.469	0.112	0	0	4.62	0.053	7.26	106.9	211.2	0	0	0	0	0.002	0.274	0.065	1.98	0	1.98	1.98	0.003	0.053	0	0	16	A	120	126
	Egg, chicken, whole, poached / Oeuf, poule, entier, poché	1 ounce (28.35g)	1	28.35	Day 1	Breakfast - 10:30am	40.8	3.333	0.277	0	0.217	2.828	0.859	103.3	12.7	0.392	2.459	32.1	77	54	0	0.4075	0.691	0.016	0.119	0.028	15.3	0	15.3	15.3	0.017	0.43	0.313	0.02	16	A	120	126
	Egg, chicken, whole, scrambled or omelet / Oeuf, poule, entier, brouillé ou omelette	1 large egg / 1 gros oeuf (61g)	2	122	Day 1	Breakfast - 7:00am	186.7	12.7	3.717	0	2.639	13.9	4.041	357.4	87.4	1.358	12.6	167	450.4	251.6	0.068	2.3375	3.049	0.072	0.525	0.142	54.1	0	54.1	54.1	0.079	1.706	2.011	0.289	16	A	120	126
	Egg, chicken, whole, scrambled or omelet / Oeuf, poule, entier, brouillé ou omelette	1 large egg / 1 gros oeuf (61g)	2	122	Day 3	Breakfast - 8:30am	186.7	12.7	3.717	0	2.639	13.9	4.041	357.4	87.4	1.358	12.6	167	450.4	251.6	0.068	2.3375	3.049	0.072	0.525	0.142	54.1	0	54.1	54.1	0.079	1.706	2.011	0.289	16	A	120	126
	Egg, chicken, white, fresh or frozen, raw / Oeuf, poule, blanc, frais ou congelé, cru	125ml (128.38g)	1	128.38	Day 1	Breakfast - 8:50am	61.6	12.8	1.517	0	0.912	0	0	0	10.1	0.073	11.5	153.5	212.5	0	0	0	1.31782	0	0.556	0.198	0	0	0	0	0	0.059	0	0	16	A	120	126
	Egg, chicken, whole, scrambled or omelet / Oeuf, poule, entier, brouillé ou omelette	1 large egg / 1 gros oeuf (61g)	3	183	Day 2	Dinner	280	19	5.576	0	3.958	20.9	6.061	536.1	131.1	2.037	18.9	250.5	675.6	377.5	0.102	3.5075	4.573	0.108	0.787	0.212	81.2	0	81.2	81.2	0.119	2.558	3.016	0.434	16	A	120	126
	Egg, chicken, whole, fried / Oeuf, poule, entier, frit	grams	110	110	Day 2	Dinner - 6:00pm	212.3	14.2	1.217	0	0.923	16.3	4.409	438.6	54	1.268	10.5	137.3	362	273	0.006	2.435	3.759	0.073	0.564	0.133	65	0	65	65	0.082	1.942	2.487	0.356	16	A	120	126
	Egg, chicken, whole, poached / Oeuf, poule, entier, poché	grams	126	126	Day 1	Breakfast - 7:00am	181.4	14.8	1.231	0	0.966	12.6	3.819	459.2	56.4	1.743	10.9	142.8	342.2	240	0	1.805	3.071	0.072	0.528	0.125	68	0	68	68	0.077	1.909	1.392	0.091	16	A	120	126
	Egg, chicken, whole, poached / Oeuf, poule, entier, poché	grams	111	111	Day 3	Breakfast - 8:30am	159.8	13	1.084	0	0.851	11.1	3.364	404.5	49.7	1.535	9.626	125.8	301.4	211.4	0	1.59	2.705	0.063	0.465	0.11	59.9	0	59.9	59.9	0.068	1.682	1.227	0.08	16	A	120	126
	Egg, chicken, whole, poached / Oeuf, poule, entier, poché	grams	110	110	Day 2	Breakfast - 9:00am	158.4	12.9	1.075	0	0.844	11	3.334	400.9	49.2	1.521	9.539	124.7	298.7	209.5	0	1.5775	2.681	0.063	0.461	0.109	59.4	0	59.3	59.3	0.067	1.666	1.216	0.079	16	A	120	126
	Freshii - Huevos Breakfast Bowl	1 bowl (100g)	1	100	Day 3	Breakfast - 10:30am	480	19	38	6	23	27	8	270	41.9883	0.819883	10.9942	184.006	900	120	10.9064	1.4	1.1	0.0508772	0.230117	0.504094	19.0058	0	19.0058	19.0058	0.116082	0.45	1.93392	0.154094	218	A	120	126
	Egg, chicken, whole, fried / Oeuf, poule, entier, frit	1 large egg / 1 gros oeuf (46g)	1	46	Day 1	Breakfast - 6:50am	88.8	5.921	0.509	0	0.386	6.813	1.844	183.4	22.6	0.53	4.387	57.4	151.4	114.2	0.002	1.0175	1.572	0.03	0.236	0.056	27.2	0	27.2	27.2	0.035	0.812	1.04	0.149	16	A	120	126
	Egg, chicken, whole, fried / Oeuf, poule, entier, frit	1 large egg / 1 gros oeuf (46g)	1	46	Day 2	Breakfast - 6:30am	88.8	5.921	0.509	0	0.386	6.813	1.844	183.4	22.6	0.53	4.387	57.4	151.4	114.2	0.002	1.0175	1.572	0.03	0.236	0.056	27.2	0	27.2	27.2	0.035	0.812	1.04	0.149	16	A	120	126
	Egg, chicken, whole, fried / Oeuf, poule, entier, frit	1 large egg / 1 gros oeuf (46g)	1	46	Day 3	Breakfast - 9:45am	88.8	5.921	0.509	0	0.386	6.813	1.844	183.4	22.6	0.53	4.387	57.4	151.4	114.2	0.002	1.0175	1.572	0.03	0.236	0.056	27.2	0	27.2	27.2	0.035	0.812	1.04	0.149	16	A	120	126
	Spinach dip, sour cream base	1 tablespoon (15g)	4	60	Day 1	Dinner - 7:00pm	154.8	1.494	3.714	0.84	0.75	15.4	3.862	12.6	45.6	0.516	17.4	106.2	166.2	158.4	1.5	0.4	1.494	0.091	0.082	0.167	31.2	0	31.2	31.2	0.137	0.102	5.726	0.764	201	A	120	128
	Spinach dip, sour cream base	1 tablespoon (15g)	4	60	Day 3	Lunch	154.8	1.494	3.714	0.84	0.75	15.4	3.862	12.6	45.6	0.516	17.4	106.2	166.2	158.4	1.5	0.4	1.494	0.091	0.082	0.167	31.2	0	31.2	31.2	0.137	0.102	5.726	0.764	201	A	120	128
	Cheese, processed, American or Cheddar type - American Cheese Slices	1 slice, NFS (.75 oz) (21g)	1	21	Day 1	Lunch - 12:20pm	70.6	3.977	1.457	0	1.352	5.47	3.272	17.2	119.1	0.109	6.3	57.5	272.4	43.9	0	0	0.048	0.013	0.104	0.033	1.47	0	1.47	1.47	0.015	0.248	0.162	0.046	204	A	120	128
	Spinach dip, sour cream base	grams	38	38	Day 1	Breakfast - 10:00am	98	0.946	2.352	0.532	0.475	9.758	2.446	7.98	28.9	0.327	11	67.3	105.3	100.3	0.95	3.8	0.946	0.058	0.052	0.106	19.8	0	19.8	19.8	0.087	0.065	3.627	0.484	201	A	120	128
	Cheese, processed, American or Cheddar type - American Cheese Slices	1 slice, NFS (.75 oz) (21g)	1	21	Day 3	Breakfast	70.6	3.977	1.457	0	1.352	5.47	3.272	17.2	119.1	0.109	6.3	57.5	272.4	43.9	0	0	0.048	0.013	0.104	0.033	1.47	0	1.47	1.47	0.015	0.248	0.162	0.046	204	A	120	128
	Cheese, processed, cheddar / Fromage fondu, cheddar	grams	25	25	Day 2	Dinner - 7:30PM	94	5.538	0.4	0	0.128	7.812	4.924	23.5	138	0.048	6.75	42.2	372.2	62.5	0	0.14375	0.068	0.007	0.088	0.017	2	0	2	2	0.018	0.175	0.152	0.096	204	A	120	128
	Steak, NS as to type of meat, cooked, NS as to fat eaten	grams	50	50	Day 2	Dinner - 7:10pm	124	13.7	0	0	0	7.42	2.902	40.5	8	0.965	10.5	151	186	0	0	0	0.225	0.035	0.068	3.228	4.5	0	4.5	4.5	0.251	0.795	0.192	0.067	22	B	140	141
	Beef, ground, lean, patty, pan-fried, degree of doneness: well done / Boeuf, haché, maigre, galette, sauté, degré de cuisson: bien cuit	grams	75	75	Day 2	Dinner - 5:30pm	194.2	22.2	0	0	0	11	4.491	63.4	11.5	2.175	19.8	273.8	63.1	0	0	0	0.09	0.086	0.251	5.006	7.5	0	7.5	7.5	0.184	2.363	0.234	0.047	22	A	140	141
	Beef, hip, sirloin tip steak, boneless, lean and fat, 0mm (0) trim, cooked, braised / Boeuf, cuisse, bifteck de pointe de surlonge, désossé, maigre et gras, 0mm (0) paré, cuit, braisé	ounces	4	113.4	Day 2	Dinner - 5:30pm	249.5	45.2	0	0	0	5.455	2.347	105.1	5.783	4.774	29	366.8	66.9	0	0	0.14	0.075	0.125	0.318	7.575	6.804	0	6.804	6.804	0.272	2.892	0.374	0.045	22	B	140	141
	Beef, hip, sirloin tip steak, boneless, lean and fat, 0mm (0) trim, cooked, braised / Boeuf, cuisse, bifteck de pointe de surlonge, désossé, maigre et gras, 0mm (0) paré, cuit, braisé	ounces	4	113.4	Day 3	Dinner - 5:45pm	249.5	45.2	0	0	0	5.455	2.347	105.1	5.783	4.774	29	366.8	66.9	0	0	0.14	0.075	0.125	0.318	7.575	6.804	0	6.804	6.804	0.272	2.892	0.374	0.045	22	B	140	141
	Steak, NS as to type of meat, cooked, NS as to fat eaten	grams	45	45	Day 2	Lunch - 12:30pm	111.6	12.3	0	0	0	6.678	2.612	36.4	7.2	0.868	9.45	135.9	167.4	0	0	0	0.202	0.032	0.062	2.905	4.05	0	4.05	4.05	0.226	0.716	0.173	0.06	22	B	140	141
	Beef, ground, lean, patty, pan-fried, degree of doneness: well done / Boeuf, haché, maigre, galette, sauté, degré de cuisson: bien cuit	grams	113	113	Day 1	Lunch - 2:08pm	292.7	33.5	0	0	0	16.6	6.766	95.5	17.3	3.277	29.8	412.4	95.1	0	0	0.14	0.1356	0.13	0.379	7.543	11.3	0	11.3	11.3	0.277	3.56	0.353	0.071	22	A	140	141
	Beef, ground, lean, patty, pan-fried, degree of doneness: well done / Boeuf, haché, maigre, galette, sauté, degré de cuisson: bien cuit	grams	170	170	Day 2	Dinner - 6:49pm	440.3	50.4	0	0	0	25	10.2	143.7	26	4.93	44.8	620.5	143.1	0	0	0.21	0.204	0.196	0.57	11.3	17	0	17	17	0.417	5.355	0.531	0.106	22	A	140	141
	Beef, ground, lean, crumbled, pan-fried, degree of doneness: well done / Boeuf, haché, maigre, émietté, sauté, degré de cuisson: bien cuit	100 grams (100g)	0.5	50	Day 1	Breakfast - 10:00am	129	14.5	0	0	0	7.425	2.984	39.6	7.088	1.412	14.2	195.1	46.7	0	0	0	0.06	0.078	0.17	3.512	0.175	0	0	0	0.175	1.438	0.145	0.031	22	A	140	141
	Beef, ground, regular, crumbled, pan-fried, rinsed, degree of doneness: well done / Boeuf, haché, régulier, émietté, sauté, rinsé, degré de cuisson: bien cuit	grams	50	50	Day 3	Dinner	124.5	13.2	0	0	0	7.55	3.149	36.7	8	1.462	10.6	141.8	36	0	0	0	0.06	0.054	0.121	2.5	0.136	0	0	0	0.136	1.625	0.131	0.034	22	C	140	141
	Beef, ground, lean, patty, pan-fried, degree of doneness: well done / Boeuf, haché, maigre, galette, sauté, degré de cuisson: bien cuit	100 grams (100g)	0.333	33.3	Day 1	Dinner - 7:00pm	86.2	9.873	0	0	0	4.895	1.994	28.1	5.087	0.966	8.783	121.5	28	0	0	0	0.0396	0.038	0.112	2.223	3.33	0	3.33	3.33	0.082	1.049	0.104	0.021	22	A	140	141
	Beef, ground, lean, patty, pan-fried, degree of doneness: well done / Boeuf, haché, maigre, galette, sauté, degré de cuisson: bien cuit	grams	77	77	Day 2	Dinner - 8:30pm	199.4	22.8	0	0	0	11.3	4.61	65.1	11.8	2.233	20.3	281	64.8	0	0	0.093175	0.0924	0.089	0.258	5.14	7.7	0	7.7	7.7	0.189	2.426	0.241	0.048	22	A	140	141
	Beef, ground, lean, patty, pan-fried, degree of doneness: well done / Boeuf, haché, maigre, galette, sauté, degré de cuisson: bien cuit	grams	80	80	Day 3	Dinner - 6:30pm	207.2	23.7	0	0	0	11.8	4.79	67.6	12.2	2.32	21.1	292	67.3	0	0	0.0968	0.096	0.092	0.268	5.34	8	0	8	8	0.196	2.52	0.25	0.05	22	A	140	141
	Beef, hip, sirloin tip steak, boneless, lean and fat, 0mm (0) trim, cooked, braised / Boeuf, cuisse, bifteck de pointe de surlonge, désossé, maigre et gras, 0mm (0) paré, cuit, braisé	grams	165	165	Day 1	Dinner - 6:00pm	363	65.7	0	0	0	7.936	3.416	153	8.415	6.946	42.2	533.8	97.4	0	0	0.19965	0.109	0.182	0.462	11	9.9	0	9.9	9.9	0.396	4.208	0.544	0.066	22	B	140	141
	Beef, hip, sirloin tip steak, boneless, lean and fat, 0mm (0) trim, cooked, braised / Boeuf, cuisse, bifteck de pointe de surlonge, désossé, maigre et gras, 0mm (0) paré, cuit, braisé	grams	63	63	Day 1	Dinner - 8:33pm	138.6	25.1	0	0	0	3.03	1.304	58.4	3.213	2.652	16.1	203.8	37.2	0	0	0.076225	0.042	0.069	0.176	4.208	3.78	0	3.78	3.78	0.151	1.606	0.208	0.025	22	B	140	141
	Beef, ground, lean, crumbled, pan-fried, degree of doneness: well done / Boeuf, haché, maigre, émietté, sauté, degré de cuisson: bien cuit	ounces	3	85.05	Day 3	Lunch - 12:30pm	219.4	24.7	0	0	0	12.6	5.075	67.3	12.1	2.403	24.2	331.9	79.4	0	0	0.1029	0.10206	0.132	0.289	5.975	0.298	0	0	0	0.298	2.445	0.247	0.053	22	A	140	141
	Beef, ground, lean, crumbled, pan-fried, degree of doneness: well done / Boeuf, haché, maigre, émietté, sauté, degré de cuisson: bien cuit	ounces	2	56.7	Day 2	Lunch - 12:30pm	146.3	16.4	0	0	0	8.42	3.384	44.8	8.037	1.602	16.1	221.3	52.9	0	0	0.0686	0.06804	0.088	0.193	3.983	0.198	0	0	0	0.198	1.63	0.164	0.035	22	A	140	141
	Beef, roast, roasted, NS as to fat eaten	ounces	4.52	128.14	Day 2	Lunch - 12:36pm	342.1	33.2	0	0	0	22.2	8.73	97.4	10.3	3.152	26.9	374.2	278.1	0	0	0	0.346	0.095	0.252	5.179	10.3	0	10.3	10.3	0.407	2.845	0.548	0.219	22	B	140	141
	Beef, roast, roasted, NS as to fat eaten	ounces	1.51	42.81	Day 3	Lunch - 12:32pm	114.3	11.1	0	0	0	7.414	2.917	32.5	3.425	1.053	8.99	125	92.9	0	0	0	0.116	0.032	0.084	1.73	3.425	0	3.425	3.425	0.136	0.95	0.183	0.073	22	B	140	141
	Beef, ground, lean, patty, pan-fried, degree of doneness: well done / Boeuf, haché, maigre, galette, sauté, degré de cuisson: bien cuit	ounces	3.5	99.23	Day 3	Dinner - 7:00pm	257	29.4	0	0	0	14.6	5.941	83.9	15.2	2.878	26.2	362.2	83.5	0	0	0.12005	0.119076	0.114	0.332	6.623	9.923	0	9.923	9.923	0.243	3.126	0.31	0.062	22	A	140	141
	Beef, loin, top sirloin roast, boneless, lean, cooked, roasted / Boeuf, longe, rôti de haut de surlonge, désossé, maigre, cuit, rôti	grams	233	233	Day 3	Dinner - 7:00pm	414.7	68.2	0	0	0	13.8	5.615	170	15	6.757	62.4	777	139.9	0	0	0.2825	0.468	0.303	0.746	15.9	14	0	14	14	0.932	6.547	0.582	0.047	22	A	140	141
	Beef, ground, lean, patty, pan-fried, degree of doneness: well done / Boeuf, haché, maigre, galette, sauté, degré de cuisson: bien cuit	grams	130	130	Day 3	Dinner - 7:00pm	336.7	38.5	0	0	0	19.1	7.784	109.9	19.9	3.77	34.3	474.5	109.4	0	0	0.1573	0.156	0.15	0.436	8.678	13	0	13	13	0.318	4.095	0.406	0.081	22	A	140	141
	Beef, ground, lean, crumbled, pan-fried, degree of doneness: well done / Boeuf, haché, maigre, émietté, sauté, degré de cuisson: bien cuit	1 ounce (28.35g)	2	56.7	Day 2	Lunch - 12:00pm	146.3	16.4	0	0	0	8.42	3.384	44.8	8.037	1.602	16.1	221.3	52.9	0	0	0.0686	0.06804	0.088	0.193	3.983	0.198	0	0	0	0.198	1.63	0.164	0.035	22	A	140	141
	Beef, ground, lean, patty, pan-fried, degree of doneness: well done / Boeuf, haché, maigre, galette, sauté, degré de cuisson: bien cuit	1 ounce (28.35g)	2.5	70.88	Day 2	Dinner - 5:30pm	183.6	21	0	0	0	10.4	4.244	59.9	10.8	2.055	18.7	258.7	59.6	0	0	0.08575	0.085056	0.082	0.237	4.731	7.088	0	7.088	7.088	0.174	2.233	0.221	0.044	22	B	140	141
	Beef, loin, strip loin roast, boneless, lean, cooked, roasted / Boeuf, longe, rôti de contre-filet, désossé, maigre, cuit, rôti	ounces	5	141.75	Day 2	Dinner	273.6	45.4	0	0	0	8.307	3.671	95.8	10.8	3.459	36.3	458.6	81.6	0	0	0.171525	0.248	0.156	0.397	12	8.505	0	8.505	8.505	0.425	3.048	0.34	0.028	22	A	140	141
	Beef, hip, sirloin tip steak, boneless, lean and fat, 0mm (0) trim, cooked, braised / Boeuf, cuisse, bifteck de pointe de surlonge, désossé, maigre et gras, 0mm (0) paré, cuit, braisé	grams	63	63	Day 1	Dinner - 8:44pm	138.6	25.1	0	0	0	3.03	1.304	58.4	3.213	2.652	16.1	203.8	37.2	0	0	0.076225	0.042	0.069	0.176	4.208	3.78	0	3.78	3.78	0.151	1.606	0.208	0.025	22	B	140	141
	Beef, ground, lean, crumbled, pan-fried, degree of doneness: well done / Boeuf, haché, maigre, émietté, sauté, degré de cuisson: bien cuit	ounces	2	56.7	Day 2	Dinner - 6:00pm	146.3	16.4	0	0	0	8.42	3.384	44.8	8.037	1.602	16.1	221.3	52.9	0	0	0.0686	0.068	0.088	0.193	3.983	0.198	0	0	0	0.198	1.63	0.164	0.035	22	A	140	141
	Beef, ground, lean, patty, pan-fried, degree of doneness: well done / Boeuf, haché, maigre, galette, sauté, degré de cuisson: bien cuit	ounces	3	85.05	Day 3	Dinner - 6:00pm	220.3	25.2	0	0	0	12.5	5.092	71.9	13	2.466	22.4	310.4	71.6	0	0	0.1029	0.10206	0.098	0.285	5.677	8.505	0	8.505	8.505	0.208	2.679	0.266	0.053	22	A	140	141
	Beef, ground, lean, crumbled, pan-fried, degree of doneness: well done / Boeuf, haché, maigre, émietté, sauté, degré de cuisson: bien cuit	grams	90	90	Day 1	Dinner - 6:15pm	232.2	26.1	0	0	0	13.4	5.371	71.2	12.8	2.542	25.6	351.2	84	0	0	0.1089	0.108	0.139	0.306	6.322	0.315	0	0	0	0.315	2.587	0.261	0.056	22	A	140	141
	Beef, ground, lean, crumbled, pan-fried, degree of doneness: well done / Boeuf, haché, maigre, émietté, sauté, degré de cuisson: bien cuit	grams	71	71	Day 2	Dinner - 6:30pm	183.2	20.6	0	0	0	10.5	4.237	56.2	10.1	2.006	20.2	277.1	66.3	0	0	0.0859	0.0852	0.11	0.241	4.988	0.248	0	0	0	0.248	2.041	0.206	0.044	22	A	140	141
	Beef, ground, lean, patty, pan-fried, degree of doneness: well done / Boeuf, haché, maigre, galette, sauté, degré de cuisson: bien cuit	grams	100	100	Day 1	Dinner - 5:30pm	259	29.6	0	0	0	14.7	5.988	84.5	15.3	2.9	26.4	365	84.2	0	0	0.121	0.12	0.115	0.335	6.675	10	0	10	10	0.245	3.15	0.312	0.062	22	A	140	141
	Beef, ground, lean, patty, pan-fried, degree of doneness: well done / Boeuf, haché, maigre, galette, sauté, degré de cuisson: bien cuit	ounces	4	113.4	Day 3	Dinner - 6:00pm	293.7	33.6	0	0	0	16.7	6.79	95.9	17.3	3.289	29.9	413.9	95.4	0	0	0.137225	0.136	0.13	0.38	7.569	11.3	0	11.3	11.3	0.278	3.572	0.354	0.071	22	A	140	141
	Beef, ground, lean, patty, pan-fried, degree of doneness: well done / Boeuf, haché, maigre, galette, sauté, degré de cuisson: bien cuit	ounces	2.75	77.96	Day 3	Dinner - 9:00pm	201.9	23.1	0	0	0	11.5	4.668	65.9	11.9	2.261	20.6	284.6	65.6	0	0	0.094325	0.093552	0.09	0.261	5.204	7.796	0	7.796	7.796	0.191	2.456	0.244	0.049	22	A	140	141
	Beef, loin, strip loin roast, boneless, lean, cooked, roasted / Boeuf, longe, rôti de contre-filet, désossé, maigre, cuit, rôti	1 food guide serving = 75g / 1 portion guide alimentaire = 75g (75g)	1	75	Day 2	Lunch - 1:30pm	144.8	24	0	0	0	4.395	1.942	50.7	5.7	1.83	19.2	242.6	43.2	0	0	0.09075	0.131	0.082	0.21	6.375	4.5	0	4.5	4.5	0.225	1.613	0.18	0.015	22	A	140	141
	Beef, ground, lean, crumbled, pan-fried, degree of doneness: well done / Boeuf, haché, maigre, émietté, sauté, degré de cuisson: bien cuit	grams	113	113	Day 3	Dinner - 6:32pm	291.5	32.8	0	0	0	16.8	6.743	89.4	16	3.192	32.1	441	105.5	0	0	0.136725	0.1356	0.175	0.384	7.938	0.396	0	0	0	0.396	3.249	0.328	0.071	22	A	140	141
	Beef, ground, regular, crumbled, pan-fried, rinsed, degree of doneness: well done / Boeuf, haché, régulier, émietté, sauté, rinsé, degré de cuisson: bien cuit	grams	90	90	Day 1	Lunch - 11:55am	224.1	23.8	0	0	0	13.6	5.668	66.1	14.4	2.632	19	255.2	64.7	0	0	0.1089	0.108	0.097	0.218	4.5	0.245	0	0	0	0.245	2.925	0.236	0.061	22	C	140	141
	Beef, ground, lean, patty, pan-fried, degree of doneness: well done / Boeuf, haché, maigre, galette, sauté, degré de cuisson: bien cuit	grams	87	87	Day 3	Dinner - 7:30pm	225.3	25.8	0	0	0	12.8	5.209	73.5	13.3	2.523	22.9	317.6	73.2	0	0	0.105275	0.1044	0.1	0.291	5.807	8.7	0	8.7	8.7	0.213	2.741	0.272	0.054	22	A	140	141
	Beef, ground, lean, patty, pan-fried, degree of doneness: well done / Boeuf, haché, maigre, galette, sauté, degré de cuisson: bien cuit	grams	86	86	Day 2	Dinner - 6:30pm	222.7	25.5	0	0	0	12.6	5.149	72.7	13.1	2.494	22.7	313.9	72.4	0	0	0.10405	0.1032	0.099	0.288	5.741	8.6	0	8.6	8.6	0.211	2.709	0.269	0.054	22	A	140	141
	Game meat, deer (venison), roasted / Gibier, viande, chevreuil (venaison), rôti	grams	118	118	Day 2	Dinner - 6:30pm	186.4	35.6	0	0	0	3.764	1.475	132.2	8.26	5.275	28.3	395.3	63.7	0	0	0	0.513	0.212	0.708	7.918	4.72	0	4.72	4.72	0.548	3.49	0.472	0.106	31	A	140	142
	Game meat, deer (venison), roasted / Gibier, viande, chevreuil (venaison), rôti	grams	84	84	Day 1	Dinner - 7:00pm	132.7	25.4	0	0	0	2.68	1.05	94.1	5.88	3.755	20.2	281.4	45.4	0	0	0	0.63	0.151	0.504	5.636	3.36	0	3.36	3.36	0.4	2.57	0.336	0.076	31	A	140	142
	Game meat, deer (venison), roasted / Gibier, viande, chevreuil (venaison), rôti	grams	74	74	Day 3	Dinner - 7:00pm	116.9	22.4	0	0	0	2.361	0.925	82.9	5.18	3.308	17.8	247.9	40	0	0	0	0.555	0.133	0.444	4.965	2.96	0	2.96	2.96	0.356	2.26	0.296	0.067	31	A	140	142
	Game meat, deer (venison), tenderloin, roast, lean, broiled / Gibier, viande de chevreuil (venaison), filet, rôti, maigre, grillé	grams	109	109	Day 3	Dinner - 6:30pm	162.4	32.6	0	0	0	2.562	1.245	95.9	5.45	4.632	36	473.1	62.1	0	0	0	0.676	0.283	0.614	9.57	9.81	0	9.81	9.81	0.669	3.946	0.082	0.031	31	A	140	142
	Canadian bacon, cooked	grams	50	50	Day 2	Dinner - 6:15pm	92.5	12.1	0.675	0	0	4.22	1.42	29	5	0.41	10.5	195	773	0	0	0	0.17	0.412	0.098	3.458	2	0	2	2	0.225	0.39	0.345	0.06	25	C	140	143
	Canadian bacon, cooked	grams	20	20	Day 1	Dinner - 6:00pm	37	4.848	0.27	0	0	1.688	0.568	11.6	2	0.164	4.2	78	309.2	0	0	0	0.068	0.165	0.039	1.383	0.8	0	0.8	0.8	0.09	0.156	0.138	0.024	25	C	140	143
	Canadian bacon, cooked	1 slice (23g)	4	92	Day 3	Lunch - 12:30pm	170.2	22.3	1.242	0	0	7.765	2.613	53.4	9.2	0.754	19.3	358.8	1422	0	0	0	0.313	0.758	0.181	6.362	3.68	0	3.68	3.68	0.414	0.718	0.635	0.11	25	C	140	143
	Canadian bacon, cooked	grams	23	23	Day 1	Dinner - 6:00pm	42.6	5.575	0.311	0	0	1.941	0.653	13.3	2.3	0.189	4.83	89.7	355.6	0	0	0	0.078	0.19	0.045	1.59	0.92	0	0.92	0.92	0.104	0.179	0.159	0.028	25	C	140	143
	Pork, side ribs centre cut (spareribs), lean and fat, simmered, roasted / Porc, côtes de flanc, centre (côtes levées), maigre et gras, mijotées, rôties	1 ounce (28.35g)	3	85.05	Day 1	Dinner - 6:00pm	284.1	22.7	0	0	0	20.8	7.952	84.4	21.6	1.191	15.3	133.5	55.6	2.551	0	0.43	0.289	0.366	0.238	4.508	3.402	0	3.402	3.402	0.145	0.774	2.356	0.179	25	A	140	143
	Ham, smoked or cured, cooked, lean only eaten - ham or baked ham, NS as to fresh, smoked, or cured	grams	32	32	Day 3	Lunch - 12:00pm	44.5	6.925	0.323	0	0.336	1.584	0.531	17	2.24	0.282	6.4	100.2	411.5	1.92	0	0	0.08	0.179	0.071	1.663	0.96	0	0.96	0.96	0.136	0.179	0.163	0.014	25	D	140	143
	Pork, ground or patty, cooked	1 oz, cooked (28.35g)	3.4	96.39	Day 2	Dinner - 6:00pm	284.4	24.6	0	0	0	19.9	7.38	89.6	21.2	1.234	23.1	346	380.7	1.928	0.675	0	0.202	0.675	0.21	4.02	5.783	0	5.783	5.783	0.374	0.521	1.567	0.067	25	B	140	143
	Ham, smoked or cured, cooked, lean only eaten - ham or baked ham, NS as to fresh, smoked, or cured	1 medium slice (approx 4-1/2" x 2-1/2" x 1/4") (42g)	1	42	Day 2	Dinner - 6:30pm	58.4	9.089	0.424	0	0.441	2.079	0.696	22.3	2.94	0.37	8.4	131.5	540.1	2.52	0	0	0.105	0.235	0.093	2.183	1.26	0	1.26	1.26	0.179	0.235	0.213	0.018	25	D	140	143
	Pork, cured, ham patties, grilled / Porc, salé fricadelles de jambon haché, grillé	grams	130	130	Day 1	Dinner - 6:00pm	444.6	17.3	2.21	0	0	40.1	14.4	93.6	11.7	2.093	13	317.2	1382	0	0	0.85	0.598	0.455	0.24	4.218	3.9	0	3.9	3.9	0.208	0.91	3.718	0.416	25	E	140	143
	Ham, smoked or cured, cooked, lean only eaten - ham or baked ham, NS as to fresh, smoked, or cured	1 thin slice (approx 4-1/2" x 2-1/2" x 1/8") (21g)	2	42	Day 1	Breakfast - 10:00am	58.4	9.089	0.424	0	0.441	2.079	0.696	22.3	2.94	0.37	8.4	131.5	540.1	2.52	0	0	0.105	0.235	0.093	2.183	1.26	0	1.26	1.26	0.179	0.235	0.213	0.018	25	D	140	143
	Ham, smoked or cured, cooked, lean only eaten - ham or baked ham, NS as to fresh, smoked, or cured	1 thin slice (approx 4-1/2" x 2-1/2" x 1/8") (21g)	1	21	Day 2	Breakfast - 9:00am	29.2	4.544	0.212	0	0.22	1.039	0.348	11.1	1.47	0.185	4.2	65.7	270.1	1.26	0	0	0.052	0.118	0.046	1.092	0.63	0	0.63	0.63	0.089	0.118	0.107	0.009	25	D	140	143
	Ham, cured, flaked, canned / Jambon, salé, flocons, conserve	grams	62	62	Day 3	Lunch - 1:00pm	84.3	9.92	0.124	0	0	4.588	1.53	27.9	3.1	0.589	8.06	155	651	0	0	0.558	0.155	0.332	0.102	1.984	0.62	0	0.62	0.62	0.198	0.434	0.453	0.049	25	D	140	143
	Pork, cured, bacon bits, cooked / Porc, salé, bacon en miettes, grillé	grams	30	30	Day 3	Dinner - 7:30pm	149.4	10.1	0.18	0	0	11.7	4.26	33	6.9	0.447	9	132	768	0	0	0	0.099	0	0	3.19	0	0	0	0	0.0927	0.348	1.23	0.063	25	C	140	143
	Hormel - Real Crumbled Bacon	grams	25	25	Day 1	Lunch - 1:00pm	89.3	10.7	0	0	0	5.36	3.57	35.7	0	0.21	0	110	678.6	0	0	0	0	0	0.049	1.73	0	0	0	0	0.113	0.172	0	0	25	C	140	143
	Hormel - Real Crumbled Bacon	grams	20	20	Day 2	Lunch - 1:00pm	71.4	8.571	0	0	0	4.29	2.8	28.6	0	0.104	0	88	542.9	0	0	0	0	0	0.039	1.38	0	0	0	0	0.09	0.156	0	0	25	C	140	143
	Ham, smoked or cured, cooked, lean only eaten - ham or baked ham, NS as to fresh, smoked, or cured	grams	94	94	Day 3	Dinner - 7:00pm	130.7	20.3	0.949	0	0.987	4.653	1.559	49.8	6.58	0.827	18.8	294.2	1209	5.64	0	0	0.235	0.526	0.208	4.886	2.82	0	2.82	2.82	0.4	0.526	0.478	0.04	25	E	140	143
	Ham, honey, smoked, cooked / Jambon, miel, fumé, cuit	grams	94	94	Day 1	Dinner - 7:00pm	114.7	16.9	6.834	0	0	2.228	1.097	20.7	5.64	0.367	7.52	155.1	846	0	0.564	0.0705	0.075	0.378	0.095	2.139	1.88	0	1.88	1.88	0.217	0.357	0.287	0.008	25	E	140	143
	Pork, fresh, loin, blade (chops), boneless, separable lean only, boneless, cooked, broiled	1 chop (131g)	1	131	Day 2	Dinner - 7:00pm	221.4	34.2	1.166	0	0	8.829	2.146	99.6	9.17	1.205	32.8	563.3	76	2.62	0	0.786	0.301	0.879	0.335	10.6	0	0	0	0	0.707	0.904	0.732	0.031	25	B	140	143
	Pork, cured, ham, whole, lean, roasted / Porc, salé, jambon entier, maigre, rôti	ounces	4	113.4	Day 1	Dinner - 5:30pm	178	28.4	0	0	0	6.237	2.087	62.4	7.938	1.066	24.9	358.3	1505	0	0	0.965	0.295	0.771	0.288	5.693	4.536	0	4.536	4.536	0.533	0.794	0.567	0.068	25	D	140	143
	Ham, cured, flaked, canned / Jambon, salé, flocons, conserve	ounces	1	28.35	Day 1	Breakfast - 9:30am	38.6	4.536	0.057	0	0	2.098	0.7	12.8	1.417	0.269	3.686	70.9	297.7	0	0	0.1701	0.071	0.152	0.047	0.907	0.284	0	0.284	0.284	0.091	0.198	0.207	0.022	25	E	140	143
	Ham, honey, smoked, cooked / Jambon, miel, fumé, cuit	1 food guide serving = 75g / 1 portion guide alimentaire = 75g (75g)	1	75	Day 2	Dinner - 6:30pm	91.5	13.4	5.452	0	0	1.777	0.875	16.5	4.5	0.292	6	123.8	675	0	0.45	0.05625	0.06	0.302	0.076	1.707	1.5	0	1.5	1.5	0.173	0.285	0.229	0.007	25	E	140	143
	Pork, loin, sirloin chop, bone-in, lean, roasted / Porc, longe, côtelette surlonge, avec os, maigre, rôti	grams	130	130	Day 1	Lunch - 1:00pm	265.2	36.1	0	0	0	12.3	3.732	115.7	16.9	1.248	33.8	457.6	76.7	0	0	0.8775	0.13	0.864	0.489	10.6	0	0	0	0	1.02	0.793	1.105	0.048	25	A	140	143
	Pork, cured, ham, whole, lean, roasted / Porc, salé, jambon entier, maigre, rôti	ounces	4	113.4	Day 1	Dinner - 7:30pm	178	28.4	0	0	0	6.237	2.087	62.4	7.938	1.066	24.9	358.3	1505	0	0	0.965	0.295	0.771	0.288	5.693	4.536	0	4.536	4.536	0.533	0.794	0.567	0.068	25	D	140	143
	Pork, loin, rib chop (rib end), bone-in, lean and fat, roasted / Porc, longe, côtelette bout côte, avec os, maigre et gras, rôti	250ml chopped or diced / 250ml haché ou en dés (141.6g)	2	283.2	Day 1	Dinner - 6:30pm	722.2	77.7	0	0	0	43.3	16.8	206.7	79.3	2.662	59.5	1192	130.3	5.664	0.85	0	1.104	2.05	0.85	17.3	8.496	0	8.496	8.496	0.918	1.869	3.285	0.113	25	B	140	143
	Pork, loin, sirloin chop, bone-in, lean, roasted / Porc, longe, côtelette surlonge, avec os, maigre, rôti	ounces	3	85.05	Day 1	Dinner - 5:30pm	173.5	23.6	0	0	0	8.029	2.442	75.7	11.1	0.816	22.1	299.4	50.2	0	0	0.575	0.085	0.566	0.32	6.944	0	0	0	0	0.668	0.519	0.723	0.031	25	A	140	143
	Ham, honey, smoked, cooked / Jambon, miel, fumé, cuit	grams	124	124	Day 2	Breakfast - 9:00am	151.3	22.2	9.015	0	0	2.939	1.447	27.3	7.44	0.484	9.92	204.6	1116	0	0.744	0.093	0.099	0.498	0.125	2.822	2.48	0	2.48	2.48	0.286	0.471	0.378	0.011	25	E	140	143
	Ham, honey, smoked, cooked / Jambon, miel, fumé, cuit	grams	34	34	Day 1	Lunch - 1:00pm	41.5	6.096	2.472	0	0	0.806	0.397	7.48	2.04	0.133	2.72	56.1	306	0	0.204	1.02	0.027	0.137	0.034	0.774	0.68	0	0.68	0.68	0.079	0.129	0.104	0.003	25	E	140	143
	Pork, cured, bacon, cooked, baked / Porc, salé, bacon, cuit, au four	1 slice = 13.8 g	3	41.2	Day 1	Breakfast - 9:00am	229.14	14.9359	0.5643	0	0	18.0861	5.9299	44.65	4.18	0.6232	12.54	225.34	916.75	4.598	0	0	0.133	0.1463	0.1045	4.4403	0.836	0	0.836	0.836	0.1292	0.4845	1.7081	0.0874	25	C	140	143
	Pork, cured, bacon, cooked, baked / Porc, salé, bacon, cuit, au four	1 slice = 13.8 g	2	27.6	Day 2	Breakfast - 7:00am	156.78	10.2193	0.3861	0	0	12.3747	4.0573	30.55	2.86	0.4264	8.58	154.18	627.25	3.146	0	0	0.091	0.1001	0.0715	3.0381	0.572	0	0.572	0.572	0.0884	0.3315	1.1687	0.0598	25	C	140	143
	Pork, cured, bacon, cooked, baked / Porc, salé, bacon, cuit, au four	grams	22	22	Day 3	Breakfast - 7:30am	120.6	7.861	0.297	0	0	9.519	3.121	23.5	2.2	0.328	6.6	118.6	482.5	2.42	0	0	0.07	0.077	0.055	2.337	0.44	0	0.44	0.44	0.068	0.255	0.899	0.046	25	C	140	143
	Pork, cured, bacon bits, cooked / Porc, salé, bacon en miettes, grillé	grams	13	13	Day 2	Lunch - 1:00pm	64.7	4.368	0.078	0	0	5.07	1.8318	14.3	2.99	0.19221	3.87	57.2	332.8	0	0	0	0.043	0	0	1.3717	0	0	0	0	0.039861	0.14964	0.5289	0.02709	25	C	140	143
	Pork, cured, bacon, cooked, baked / Porc, salé, bacon, cuit, au four	1 slice = 13.8 g	2	27.6	Day 1	Lunch - 2:00pm	152.76	9.95727	0.3762	0	0	12.0574	3.95327	29.7667	2.78667	0.415467	8.36	150.227	611.167	3.06533	0	0	0.0886667	0.0975333	0.0696667	2.9602	0.557333	0	0.557333	0.557333	0.0861333	0.323	1.13873	0.0582667	25	C	140	143
	Pork, cured, bacon, cooked, baked / Porc, salé, bacon, cuit, au four	1 slice = 13.8 g	2	27.6	Day 3	Breakfast - 11:30am	152.76	9.95727	0.3762	0	0	12.0574	3.95327	29.7667	2.78667	0.415467	8.36	150.227	611.167	3.06533	0	0	0.0886667	0.0975333	0.0696667	2.9602	0.557333	0	0.557333	0.557333	0.0861333	0.323	1.13873	0.0582667	25	C	140	143
	Pork, ground, medium, pan-fried / Porc, haché, mi-maigre, sauté	ounces	4.4	124.74	Day 1	Dinner - 5:00pm	373	30.6	0	0	0	26.8	10	110	13.5	1.372	31.4	456.5	112.9	2.495	0.873	0.375	0.262	1.272	0.299	9.231	7.484	0	7.484	7.484	0.337	1.435	2.944	0.324	25	B	140	143
	Pork, loin, tenderloin, lean and fat, broiled / Porc, longe, filet, maigre et gras, grillé	ounces	1	28.35	Day 1	Breakfast - 9:30am	47.1	8.097	0	0	0	1.369	0.57	22.8	1.417	0.394	9.922	125.9	18.1	0.567	0.284	0.08505	0.071	0.274	0.107	1.433	1.701	0	1.701	1.701	0.146	0.278	0.173	0.009	25	B	140	143
	Pork, fresh, loin, top loin (chops), boneless, separable lean and fat, cooked, pan-broiled	1 chop boneless (yield from 189g raw meat) (150g)	2	300	Day 3	Dinner - 6:00pm	570	85	0	0	0	23	8.175	225	30	1.89	84	1536	615	6	0	0	0.72	1.848	0.552	30.6	3	0	3	3	1.428	1.65	1.539	0.114	25	B	140	143
	Ham, honey, smoked, cooked / Jambon, miel, fumé, cuit	1 food guide serving = 75g / 1 portion guide alimentaire = 75g (75g)	0.5	37.5	Day 1	Breakfast - 8:00am	45.8	6.724	2.726	0	0	0.889	0.438	8.25	2.25	0.146	3	61.9	337.5	0	0.225	0.028125	0.03	0.151	0.038	0.854	0.75	0	0.75	0.75	0.087	0.142	0.114	0.003	25	E	140	143
	Pork, cured, ham, whole, lean, roasted / Porc, salé, jambon entier, maigre, rôti	ounces	1	28.35	Day 3	Breakfast - 7:00am	44.5	7.102	0	0	0	1.559	0.522	15.6	1.984	0.266	6.237	89.6	376.2	0	0	0.240975	0.074	0.193	0.072	1.423	1.134	0	1.134	1.134	0.133	0.198	0.142	0.017	25	E	140	143
	Pork, loin, rib chop (rib end), bone-in, lean and fat, roasted / Porc, longe, côtelette bout côte, avec os, maigre et gras, rôti	250ml chopped or diced / 250ml haché ou en dés (141.6g)	1	141.6	Day 3	Dinner - 5:00pm	361.1	38.8	0	0	0	21.6	8.383	103.4	39.6	1.331	29.7	596.1	65.1	2.832	0.425	0	0.552	1.025	0.425	8.66	4.248	0	4.248	4.248	0.459	0.935	1.643	0.057	25	B	140	143
	Pork, loin, tenderloin, lean and fat, broiled / Porc, longe, filet, maigre et gras, grillé	250ml chopped or diced / 250ml haché ou en dés (141.6g)	1	141.6	Day 2	Dinner - 5:00pm	235.1	40.4	0	0	0	6.839	2.846	114	7.08	1.968	49.6	628.7	90.6	2.832	1.416	0.425	0.354	1.371	0.535	7.156	8.496	0	8.496	8.496	0.729	1.388	0.864	0.042	25	B	140	143
	Ham, honey, smoked, cooked / Jambon, miel, fumé, cuit	grams	124	124	Day 3	Lunch - 1:30pm	151.3	22.2	9.015	0	0	2.939	1.447	27.3	7.44	0.484	9.92	204.6	1116	0	0.744	0.093	0.099	0.498	0.125	2.822	2.48	0	2.48	2.48	0.286	0.471	0.378	0.011	25	E	140	143
	Pork, loin, tenderloin, lean, roasted / Porc, longe, filet, maigre, rôti	grams	212	212	Day 2	Dinner - 7:00pm	305.3	60.2	0	0	0	5.3	2.374	148.2	13.6	2.756	65.7	854.4	123.4	4.24	0.848	0.425	0.424	2.968	0.806	20.6	12.7	0	12.7	12.7	0.933	1.166	0.784	0.042	25	A	140	143
	Pork, cured, bacon, cooked, baked / Porc, salé, bacon, cuit, au four	1 slice = 13.8 g	4	55.2	Day 2	Dinner	305.52	19.9145	0.7524	0	0	24.1148	7.90653	59.5333	5.57333	0.830933	16.72	300.453	1222.33	6.13067	0	0	0.177333	0.195067	0.139333	5.9204	1.11467	0	1.11467	1.11467	0.172267	0.646	2.27747	0.116533	25	C	140	143
	Pork, loin, tenderloin, lean, roasted / Porc, longe, filet, maigre, rôti	ounces	2	56.7	Day 1	Lunch - 12:00pm	81.6	16.1	0	0	0	1.417	0.635	39.6	3.629	0.737	17.6	228.5	33	1.134	0.227	0.1134	0.113	0.794	0.215	5.5	3.402	0	3.402	3.402	0.249	0.312	0.21	0.011	25	A	140	143
	Pork, loin, tenderloin, lean, roasted / Porc, longe, filet, maigre, rôti	ounces	2	56.7	Day 1	Dinner - 6:30pm	81.6	16.1	0	0	0	1.417	0.635	39.6	3.629	0.737	17.6	228.5	33	1.134	0.227	0.1134	0.113	0.794	0.215	5.5	3.402	0	3.402	3.402	0.249	0.312	0.21	0.011	25	A	140	143
	Pork, loin, tenderloin, lean, roasted / Porc, longe, filet, maigre, rôti	grams	128	128	Day 3	Dinner - 6:30pm	184.3	36.4	0	0	0	3.2	1.434	89.5	8.192	1.664	39.7	515.8	74.5	2.56	0.512	0.255	0.256	1.792	0.486	12.4	7.68	0	7.68	7.68	0.563	0.704	0.474	0.026	25	A	140	143
	Pork, loin, tenderloin, lean, roasted / Porc, longe, filet, maigre, rôti	grams	125	125	Day 2	Dinner - 6:00pm	180	35.5	0	0	0	3.125	1.4	87.4	8	1.625	38.8	503.8	72.8	2.5	0.5	0.25	0.25	1.75	0.475	12.1	7.5	0	7.5	7.5	0.55	0.688	0.462	0.025	25	A	140	143
	Pork, loin, tenderloin, lean, roasted / Porc, longe, filet, maigre, rôti	ounces	2.8	79.38	Day 1	Dinner - 6:30pm	114.3	22.5	0	0	0	1.984	0.889	55.5	5.08	1.032	24.6	319.9	46.2	1.588	0.318	0.15875	0.159	1.111	0.302	7.7	4.763	0	4.763	4.763	0.349	0.437	0.294	0.016	25	A	140	143
	Maple Leaf - Ready Crisp Bacon Strips	grams	10	10	Day 2	Dinner - 7:30PM	56	3.2	0.4	0	0	4.8	1.8	8	0	0.144	2.09783	39	240	0	0	0	0.0340217	0.0823913	0.0196739	0.691522	0.4	0	0.4	0.4	0.045	0.0780435	0.0690217	0.0119565	25	C	140	143
	Pork, cured, bacon bits, cooked / Porc, salé, bacon en miettes, grillé	15mL (5.1g)	1	5.1	Day 1	Lunch - 11:30AM	24.9	1.68	0.03	0	0	1.95	0.71	5.5	1.15	0.0745	1.5	22	128	0	0	0	0.0165	0	0	0.531667	0	0	0	0	0.01545	0.058	0.205	0.0105	25	C	140	143
	Pork, loin, tenderloin, lean and fat, broiled / Porc, longe, filet, maigre et gras, grillé	grams	140	140	Day 1	Dinner - 7:00PM	232.4	40	0	0	0	6.762	2.814	112.7	7	1.946	49	621.6	89.6	2.8	1.4	0.42	0.35	1.355	0.529	7.076	8.4	0	8.4	8.4	0.721	1.372	0.854	0.042	25	B	140	143
	Chicken, broilers or fryers, thigh, meat and skin, cooked, rotisserie, original seasoning	grams	210	210	Day 1	Dinner - 6:30pm	489.3	48.2	0.042	0	0.042	33	8.658	277.2	31.5	2.037	46.2	546	724.5	44.1	0	0	0.567	0.109	0.447	11.5	25.2	0	25.2	25.2	0.355	0.987	4.523	0.267	27	B	140	144
	Chicken, broilers or fryers, thigh, meat and skin, cooked, rotisserie, original seasoning	grams	63	63	Day 3	Lunch - 12:30pm	146.8	14.4	0.013	0	0.013	9.891	2.597	83.2	9.45	0.611	13.9	163.8	217.4	13.2	0	0	0.17	0.033	0.134	3.457	7.56	0	7.56	7.56	0.106	0.296	1.357	0.08	27	B	140	144
	Chicken, roasting, drumstick, meat, roasted / Poulet à rôtir, pilon, viande, rôti	1 ounce (28.35g)	4	113.4	Day 1	Dinner - 7:00pm	188.2	27.5	0	0	0	7.802	2.756	85	12.5	1.508	22.7	254	107.7	18.1	0	0.31	0.305	0.071	0.218	6.505	7.938	0	7.938	7.938	0.352	0.306	1.916	0.091	27	A	140	144
	Chicken, roasting, breast, meat and skin, roasted / Poulet à rôtir, poitrine, viande et peau, rôti	100ml chopped or diced / 100ml haché ou en dés (57.06g)	0.75	42.79	Day 3	Dinner - 7:00pm	80.5	11.1	0	0	0	3.74	0.998	32.5	5.135	0.539	8.559	90.3	31.2	10.7	0	0.12	0.128	0.024	0.061	3.174	2.14	0	2.14	2.14	0.15	0.116	0.681	0.032	27	B	140	144
	Chicken, roasting, thigh, meat and skin, roasted / Poulet à rôtir, haut de cuisse, viande et peau, rôti	grams	75	75	Day 3	Dinner - 6:30pm	183	15	0	0	0	13.2	2.805	57	9	0.945	15	158.2	54.8	18.8	0	0.2	0.203	0.043	0.107	5.564	3.75	0	3.75	3.75	0.262	0.203	1.912	0.09	27	B	140	144
	Chicken, roasting, thigh, meat and skin, roasted / Poulet à rôtir, haut de cuisse, viande et peau, rôti	ounces	4	113.4	Day 1	Dinner - 7:00pm	276.7	22.7	0	0	0	19.9	4.241	86.2	13.6	1.429	22.7	239.3	82.8	28.4	0	0.31	0.305	0.065	0.162	8.412	5.67	0	5.67	5.67	0.397	0.306	2.892	0.136	27	B	140	144
	Chicken, ground, lean, cooked / Poulet, haché, maigre, cuit	ounces	6	170.1	Day 2	Lunch - 3:00pm	321.5	36.6	0	0	0	21.1	6.005	182	42.1	2.739	47.6	480.3	116.5	0	0	0.46	0.667	0.206	0.514	12.1	3.402	0	3.402	3.402	0.915	0.868	3.11	0.171	27	A	140	144
	Chicken, ground, lean, cooked / Poulet, haché, maigre, cuit	ounces	6	170.1	Day 3	Lunch - 11:30am	321.5	36.6	0	0	0	21.1	6.005	182	42.1	2.739	47.6	480.3	116.5	0	0	0.46	0.667	0.206	0.514	12.1	3.402	0	3.402	3.402	0.915	0.868	3.11	0.171	27	A	140	144
	Chicken, roasting, breast, meat and skin, roasted / Poulet à rôtir, poitrine, viande et peau, rôti	grams	66	66	Day 3	Lunch - 12:15pm	124.1	17.1	0	0	0	5.768	1.539	50.2	7.92	0.832	13.2	139.3	48.2	16.5	0	0.18	0.198	0.038	0.094	4.896	3.3	0	3.3	3.3	0.231	0.178	1.05	0.049	27	B	140	144
	Turkey, broiler, breast, meat and skin, roasted / Dinde à griller, poitrine, viande et peau, rôtie	grams	110	110	Day 2	Lunch - 11:00am	179.3	32.6	0	0	0	4.487	1.572	91.6	8.067	0.383	22.8	378.8	49.1	0	0	0.14	0.099	0.045	0.149	13.1	6.6	0	6.6	6.6	0.256	1.054	1.031	0.068	27	D	140	144
	Turkey, broiler, breast, meat and skin, roasted / Dinde à griller, poitrine, viande et peau, rôtie	grams	110	110	Day 3	Lunch - 11:00am	179.3	32.6	0	0	0	4.487	1.572	91.6	8.067	0.383	22.8	378.8	49.1	0	0	0.14	0.099	0.045	0.149	13.1	6.6	0	6.6	6.6	0.256	1.054	1.031	0.068	27	D	140	144
	Chicken, broiler, meat only, fried / Poulet à griller, viande seulement, frit	100ml (57.06g)	1	57.06	Day 1	Dinner - 7:00pm	125	17.4	0.964	0.057	0	5.204	1.404	53.6	9.7	0.77	15.4	146.6	51.9	10.3	0	0.15	0.262	0.048	0.113	5.514	3.994	0	3.994	3.994	0.274	0.194	1.016	0.051	27	A	140	144
	Duck, duckling, domestic, Pekin, leg, meat only, bone in, cooked without skin, braised / Canard, caneton, domestique, Pékin, cuisse, viande, non désossé, cuit sans peau, braisé	ounces	2	56.7	Day 3	Dinner - 6:00pm	100.9	16.5	0	0	0	3.379	0.759	59.5	5.67	1.321	11.34	142.88	61.2	13	1.304	0.0567	0.397	0.147	0.266	3.022	5.67	0	5.67	5.67	0.142	0.227	0.463	0.022	27	E	140	144
	Chicken, roasting, breast, meat and skin, roasted / Poulet à rôtir, poitrine, viande et peau, rôti	ounces	3	85.05	Day 3	Dinner - 5:00pm	159.9	22	0	0	0	7.433	1.984	64.6	10.2	1.072	17	179.5	62.1	21.3	0	0.23	0.255	0.048	0.122	6.309	4.252	0	4.252	4.252	0.298	0.23	1.352	0.064	27	B	140	144
	Chicken, roasting, breast, meat and skin, roasted / Poulet à rôtir, poitrine, viande et peau, rôti	ounces	3.5	99.23	Day 2	Dinner - 6:15pm	186.5	25.6	0	0	0	8.672	2.314	75.4	11.9	1.25	19.8	209.4	72.4	24.8	0	0.27	0.298	0.057	0.142	7.361	4.961	0	4.961	4.961	0.347	0.268	1.578	0.074	27	B	140	144
	Turkey, broiler, breast, meat and skin, roasted / Dinde à griller, poitrine, viande et peau, rôtie	ounces	3.3	93.55	Day 1	Lunch - 11:40am	152.5	27.7	0	0	0	3.816	1.337	77.9	6.861	0.326	19.4	322.2	41.8	0	0	0.12	0.084	0.038	0.126	11.1	5.613	0	5.613	5.613	0.218	0.896	0.877	0.058	27	D	140	144
	Chicken, roasting, breast, meat and skin, roasted / Poulet à rôtir, poitrine, viande et peau, rôti	ounces	4.54	128.71	Day 2	Dinner - 6:30pm	242	33.3	0	0	0	11.2	3.002	97.8	15.4	1.622	25.7	271.6	94	32.2	0	0.35	0.386	0.073	0.184	9.548	6.435	0	6.435	6.435	0.45	0.348	2.047	0.096	27	B	140	144
	Turkey, broiler, breast, meat and skin, roasted / Dinde à griller, poitrine, viande et peau, rôtie	ounces	2.47	70.02	Day 3	Lunch - 12:30pm	114.1	20.8	0	0	0	2.856	1.001	58.3	5.136	0.244	14.5	241.2	31.3	0	0	0.88	0.063	0.029	0.095	8.33	4.201	0	4.201	4.201	0.163	0.671	0.656	0.043	27	D	140	144
	Chicken, roasting, breast, meat, roasted / Poulet à rôtir, poitrine, viande, rôti	grams	145	145	Day 1	Dinner - 7:00pm	213.2	43.4	0	0	0	3.016	0.8	108.8	18.8	1.566	33.4	342.2	74	11.6	0	0.39	0.242	0.088	0.135	15.2	4.35	0	4.35	4.35	0.783	0.45	0.511	0.022	27	A	140	144
	Turkey, broiler, breast, meat and skin, roasted / Dinde à griller, poitrine, viande et peau, rôtie	grams	127	127	Day 2	Dinner - 6:00pm	207	37.6	0	0	0	5.18	1.815	105.8	9.314	0.442	26.4	437.4	56.7	0	0	0.16	0.114	0.052	0.171	15.1	7.62	0	7.62	7.62	0.296	1.217	1.19	0.079	27	D	140	144
	Turkey, broiler, breast, meat and skin, roasted / Dinde à griller, poitrine, viande et peau, rôtie	grams	206	206	Day 3	Dinner - 7:00pm	335.8	61	0	0	0	8.403	2.944	171.6	15.1	0.717	42.8	709.5	92	0	0	0.26	0.185	0.084	0.278	24.5	12.4	0	12.4	12.4	0.48	1.973	1.93	0.128	27	D	140	144
	Chicken, roasting, breast, meat, roasted / Poulet à rôtir, poitrine, viande, rôti	ounces	6	170.1	Day 2	Dinner - 6:30pm	250	50.9	0	0	0	3.538	0.939	127.6	22.1	1.837	39.1	401.4	86.8	13.6	0	0.46	0.284	0.104	0.158	17.8	5.103	0	5.103	5.103	0.919	0.527	0.6	0.026	27	A	140	144
	Turkey, light meat, roasted, NS as to skin eaten	1 thin slice (approx 3" x 2" x 1/8") (14g)	3	42	Day 1	Lunch - 12:20pm	82.3	11.9	0	0	0	3.486	0.979	31.9	8.82	0.588	10.9	119.3	94.5	0	0	0	0.055	0.024	0.055	2.63	2.52	0	2.52	2.52	0.197	0.147	0.686	0.042	27	D	140	144
	Chicken, roasting, breast, meat, roasted / Poulet à rôtir, poitrine, viande, rôti	grams	125	125	Day 1	Dinner - 6:30pm	183.8	37.4	0	0	0	2.6	0.69	93.8	16.2	1.35	28.8	295	63.8	10	0	0.34	0.209	0.076	0.116	13.1	3.75	0	3.75	3.75	0.675	0.388	0.441	0.019	27	A	140	144
	Chicken, roasting, breast, meat, roasted / Poulet à rôtir, poitrine, viande, rôti	grams	124	124	Day 2	Dinner	182.3	37.1	0	0	0	2.579	0.684	93	16.1	1.339	28.5	292.6	63.2	9.92	0	0.34	0.207	0.076	0.115	13	3.72	0	3.72	3.72	0.67	0.384	0.437	0.019	27	A	140	144
	Turkey, tom, thigh, meat and skin, roasted / Dindon, jeune, haut de cuisse, viande et peau, rôti	grams	145	145	Day 3	Dinner - 6:00pm	295.8	39	0	0	0	14.3	4.923	177	10.2	1.362	22.9	403.7	98.7	0	0	0.57	0.906	0.09	0.358	7.182	13	0	13	13	0.252	2.601	3.442	0.289	27	D	140	144
	Turkey, broiler, breast, meat and skin, roasted / Dinde à griller, poitrine, viande et peau, rôtie	grams	100	100	Day 3	Lunch - 12:01pm	163	29.6	0	0	0	4.079	1.429	83.3	7.334	0.348	20.8	344.4	44.6	0	0	0.13	0.09	0.041	0.135	11.9	6	0	6	6	0.233	0.958	0.937	0.062	27	D	140	144
	Chicken, roasting, breast, meat and skin, roasted / Poulet à rôtir, poitrine, viande et peau, rôti	grams	115	115	Day 3	Dinner - 7:00pm	216.2	29.7	0	0	0	10.1	2.682	87.4	13.8	1.449	23	242.6	84	28.8	0	0.31	0.345	0.066	0.164	8.531	5.75	0	5.75	5.75	0.402	0.31	1.829	0.086	27	B	140	144
	Chicken, roasting, breast, meat and skin, roasted / Poulet à rôtir, poitrine, viande et peau, rôti	grams	120	120	Day 2	Dinner - 7:00pm	225.6	31	0	0	0	10.5	2.799	91.2	14.4	1.512	24	253.2	87.6	30	0	0.33	0.36	0.068	0.172	8.902	6	0	6	6	0.42	0.324	1.908	0.09	27	B	140	144
	Chicken, roasting, breast, meat, roasted / Poulet à rôtir, poitrine, viande, rôti	grams	200	200	Day 1	Dinner - 5:30pm	294	59.9	0	0	0	4.16	1.104	150	26	2.16	46	472	102	16	0	0.54	0.334	0.122	0.186	20.9	6	0	6	6	1.08	0.62	0.705	0.031	27	A	140	144
	Chicken, roasting, breast, meat, roasted / Poulet à rôtir, poitrine, viande, rôti	grams	200	200	Day 2	Dinner - 6:00pm	294	59.9	0	0	0	4.16	1.104	150	26	2.16	46	472	102	16	0	0.54	0.334	0.122	0.186	20.9	6	0	6	6	1.08	0.62	0.705	0.031	27	A	140	144
	Chicken, roasting, breast, meat and skin, roasted / Poulet à rôtir, poitrine, viande et peau, rôti	grams	41	41	Day 2	Dinner	77.1	10.6	0	0	0	3.583	0.956	31.2	4.92	0.517	8.2	86.5	29.9	10.2	0	0.1	0.123	0.023	0.059	3.041	2.05	0	2.05	2.05	0.144	0.111	0.652	0.031	27	B	140	144
	Chicken, roasting, breast, meat and skin, roasted / Poulet à rôtir, poitrine, viande et peau, rôti	grams	41	41	Day 3	Lunch	77.1	10.6	0	0	0	3.583	0.956	31.2	4.92	0.517	8.2	86.5	29.9	10.2	0	0.1	0.123	0.023	0.059	3.041	2.05	0	2.05	2.05	0.144	0.111	0.652	0.031	27	B	140	144
	Chicken, roasting, breast, meat and skin, roasted / Poulet à rôtir, poitrine, viande et peau, rôti	grams	250	250	Day 1	Lunch - 1:30pm	470	64.6	0	0	0	21.8	5.831	190	30	3.15	50	527.5	182.5	62.5	0	0.68	0.75	0.142	0.358	18.5	12.5	0	12.5	12.5	0.875	0.675	3.975	0.187	27	B	140	144
	Chicken, roasting, breast, meat, roasted / Poulet à rôtir, poitrine, viande, rôti	grams	100	100	Day 2	Dinner - 7:00pm	147	29.9	0	0	0	2.08	0.552	75	13	1.08	23	236	51	8	0	0.27	0.167	0.061	0.093	10.5	3	0	3	3	0.54	0.31	0.353	0.015	27	A	140	144
	Chicken, roasting, breast, meat and skin, roasted / Poulet à rôtir, poitrine, viande et peau, rôti	grams	86	86	Day 1	Lunch - 1:00pm	161.7	22.2	0	0	0	7.516	2.006	65.4	10.3	1.084	17.2	181.5	62.8	21.5	0	0.23	0.258	0.049	0.123	6.379	4.3	0	4.3	4.3	0.301	0.232	1.368	0.064	27	B	140	144
	Chicken, roasting, breast, meat, roasted / Poulet à rôtir, poitrine, viande, rôti	grams	120	120	Day 2	Lunch - 1:30pm	176.4	35.9	0	0	0	2.496	0.662	90	15.6	1.296	27.6	283.2	61.2	9.6	0	0.33	0.2	0.073	0.112	12.6	3.6	0	3.6	3.6	0.648	0.372	0.423	0.018	27	A	140	144
	Chicken, roasting, breast, meat, roasted / Poulet à rôtir, poitrine, viande, rôti	ounces	8.25	233.89	Day 1	Dinner - 8:30pm	343.8	70	0	0	0	4.865	1.291	175.4	30.4	2.526	53.8	552	119.3	18.7	0	0.63	0.391	0.143	0.218	24.5	7.017	0	7.017	7.017	1.263	0.725	0.825	0.036	27	A	140	144
	Butter Ball - Extra Lean Turkey Burgers	1 patty (142g)	1	142	Day 3	Dinner - 8:00pm	180	24	3	1	0	8	3	90	20	1.44	26.98	410	470	0	0	0	0.48	0.077	0.239	8.19	9.94	0	9.94	9.94	0.212	4.54	2.62	0.152	27	C	140	144
	Chicken, broilers or fryers, thigh, meat and skin, cooked, rotisserie, original seasoning	grams	80	80	Day 1	Lunch - 1:00pm	186.4	18.3	0.016	0	0.016	12.6	3.298	105.6	12	0.776	17.6	208	276	16.8	0	0	0.216	0.042	0.17	4.39	9.6	0	9.6	9.6	0.135	0.376	1.723	0.102	27	B	140	144
	Chicken, broilers or fryers, thigh, meat and skin, cooked, rotisserie, original seasoning	grams	78	78	Day 2	Lunch - 1:00pm	181.7	17.9	0.016	0	0.016	12.2	3.216	103	11.7	0.757	17.2	202.8	269.1	16.4	0	0	0.211	0.041	0.166	4.28	9.36	0	9.36	9.36	0.132	0.367	1.68	0.099	27	B	140	144
	Chicken, roasting, breast, meat, roasted / Poulet à rôtir, poitrine, viande, rôti	250ml chopped or diced / 250ml haché ou en dés (142.65g)	0.333	47.5	Day 1	Dinner - 7:00pm	69.8	14.2	0	0	0	0.988	0.262	35.6	6.175	0.513	10.9	112.1	24.2	3.8	0	0.13	0.079	0.029	0.044	4.973	1.425	0	1.425	1.425	0.257	0.147	0.168	0.007	27	A	140	144
	Chicken, roasting, breast, meat, roasted / Poulet à rôtir, poitrine, viande, rôti	250ml chopped or diced / 250ml haché ou en dés (142.65g)	1	142.65	Day 2	Dinner - 6:30pm	209.7	42.7	0	0	0	2.967	0.787	107	18.5	1.541	32.8	336.6	72.7	11.4	0	0.385	0.238	0.087	0.133	14.9	4.279	0	4.279	4.279	0.77	0.442	0.503	0.022	27	A	140	144
	Chicken, roasting, breast, meat, roasted / Poulet à rôtir, poitrine, viande, rôti	grams	60	60	Day 3	Lunch - 12:0pm	88.2	18	0	0	0	1.248	0.331	45	7.8	0.648	13.8	141.6	30.6	4.8	0	0.162	0.1	0.037	0.056	6.281	1.8	0	1.8	1.8	0.324	0.186	0.212	0.009	27	A	140	144
	Chicken, roasting, thigh, meat and skin, roasted / Poulet à rôtir, haut de cuisse, viande et peau, rôti	grams	55	55	Day 2	Lunch - 1:00pm	134.2	11	0	0	0	9.674	2.057	41.8	6.6	0.693	11	116	40.2	13.8	0	0.1485	0.148451	0.031	0.079	4.08	2.75	0	2.75	2.75	0.192	0.149	1.402	0.066	27	B	140	144
	Turkey, broiler, breast, meat and skin, roasted / Dinde à griller, poitrine, viande et peau, rôtie	grams	44	44	Day 1	Lunch - 12:45pm	71.7	13	0	0	0	1.795	0.629	36.6	3.227	0.153	9.136	151.5	19.6	0	0	0.055	0.04	0.018	0.059	5.234	2.64	0	2.64	2.64	0.103	0.422	0.412	0.027	27	D	140	144
	Turkey, all classes, ground, cooked / Dinde, toutes catégories, hachée, cuite	ounces	4	113.4	Day 3	Lunch - 12:30pm	222.3	31.3	0	0	0	9.873	3.247	144.4	94.4	1.221	21.8	377.7	95.3	0	0	0.33	0.386	0.061	0.191	6.539	7.938	0	7.938	7.938	0.169	3.632	2.091	0.137	27	D	140	144
	Turkey, all classes, ground, cooked / Dinde, toutes catégories, hachée, cuite	1 ounce (28.35g)	1	28.35	Day 2	Lunch - 12:30pm	55.6	7.833	0	0	0	2.468	0.812	36.1	23.6	0.305	5.455	94.4	23.8	0	0	0.082225	0.096	0.015	0.048	1.635	1.985	0	1.985	1.985	0.042	0.908	0.523	0.034	27	D	140	144
	Chicken, roasting, breast, meat, roasted / Poulet à rôtir, poitrine, viande, rôti	ounces	4	113.4	Day 1	Dinner - 6:15pm	166.7	33.9	0	0	0	2.359	0.626	85	14.7	1.225	26.1	267.6	57.8	9.072	0	0.305	0.189	0.069	0.105	11.9	3.402	0	3.402	3.402	0.612	0.352	0.4	0.017	27	A	140	144
	Chicken, roasting, breast, meat, roasted / Poulet à rôtir, poitrine, viande, rôti	ounces	2	56.7	Day 3	Dinner - 6:00pm	83.3	17	0	0	0	1.179	0.313	42.5	7.371	0.612	13	133.8	28.9	4.536	0	0.1531	0.095	0.035	0.053	5.936	1.701	0	1.701	1.701	0.306	0.176	0.2	0.009	27	A	140	144
	Chicken, roasting, breast, meat, roasted / Poulet à rôtir, poitrine, viande, rôti	grams	66	66	Day 3	Lunch - 12:15pm	97	19.8	0	0	0	1.373	0.364	49.5	8.58	0.713	15.2	155.8	33.7	5.28	0	0.1782	0.11	0.04	0.061	6.91	1.98	0	1.98	1.98	0.356	0.205	0.233	0.01	27	A	140	144
	Chicken, roasting, thigh, meat and skin, roasted / Poulet à rôtir, haut de cuisse, viande et peau, rôti	1 thigh / 1 haut de cuisse (119.61g)	2	239.23	Day 3	Lunch - 2:00pm	583.7	47.9	0	0	0	42.1	8.947	181.8	28.7	3.014	47.8	504.8	174.6	59.8	0	0.645	0.645709	0.136	0.342	17.7	12	0	12	12	0.837	0.646	6.1	0.287	27	B	140	144
	Chicken, skin (drumsticks and thighs), cooked, braised	1 oz (28.35g)	2.29	64.92	Day 1	Dinner	287.6	9.485	0	0	0	27.8	7.735	84.4	5.843	0.649	9.089	104.5	48.7	31.2	0	0.065	0.123	0.032	0.036	2.207	1.948	0	1.948	1.948	0.116	0.292	5.137	0.247	27	B	140	144
	Turkey, broiler, breast, meat and skin, roasted / Dinde à griller, poitrine, viande et peau, rôtie	ounces	2.1	59.53	Day 1	Lunch - 12:05pm	97	17.6	0	0	0	2.428	0.851	49.6	4.366	0.207	12.4	205	26.6	0	0	0.074425	0.054	0.024	0.08	7.082	3.572	0	3.572	3.572	0.139	0.57	0.558	0.037	27	D	140	144
	Turkey, broiler, breast, meat and skin, roasted / Dinde à griller, poitrine, viande et peau, rôtie	ounces	1.41	39.97	Day 2	Dinner - 6:00pm	65.2	11.8	0	0	0	1.631	0.571	33.3	2.932	0.139	8.3	137.7	17.8	0	0	0.049975	0.036	0.016	0.054	4.755	2.398	0	2.398	2.398	0.093	0.383	0.375	0.025	27	D	140	144
	Chicken, roasting, breast, meat, roasted / Poulet à rôtir, poitrine, viande, rôti	grams	295	295	Day 1	Dinner - 7:00pm	433.6	88.3	0	0	0	6.136	1.628	221.2	38.4	3.186	67.8	696.2	150.4	23.6	0	0.7975	0.493	0.18	0.274	30.9	8.85	0	8.85	8.85	1.593	0.914	1.04	0.045	27	A	140	144
	Chicken, roasting, breast, meat, roasted / Poulet à rôtir, poitrine, viande, rôti	grams	292	292	Day 2	Dinner - 7:00pm	429.2	87.4	0	0	0	6.074	1.612	219	38	3.154	67.2	689.1	148.9	23.4	0	0.7875	0.488	0.178	0.272	30.6	8.76	0	8.76	8.76	1.577	0.905	1.03	0.045	27	A	140	144
	Chicken, roasting, breast, meat, roasted / Poulet à rôtir, poitrine, viande, rôti	grams	132	132	Day 2	Lunch	194	39.5	0	0	0	2.746	0.729	99	17.2	1.426	30.4	311.5	67.3	10.6	0	0.3575	0.22	0.081	0.123	13.8	3.96	0	3.96	3.96	0.713	0.409	0.466	0.02	27	A	140	144
	Turkey, broiler, breast, meat and skin, roasted / Dinde à griller, poitrine, viande et peau, rôtie	ounces	2	56.7	Day 3	Lunch - 12:00pm	92.4	16.8	0	0	0	2.313	0.81	47.2	4.158	0.197	11.8	195.3	25.3	0	0	0.070875	0.051	0.023	0.077	6.745	3.402	0	3.402	3.402	0.132	0.543	0.531	0.035	27	D	140	144
	Chicken, roasting, thigh, meat, roasted / Poulet à rôtir, haut de cuisse, viande, rôti	grams	110.4	110.4	Day 2	Dinner - 7:20pm	183.3	26.8	0	0	0	7.596	2.683	82.8	12.1	1.468	22.1	247.3	104.9	17.7	0	0.2975	0.297982	0.07	0.212	6.333	7.728	0	7.728	7.728	0.342	0.298	1.866	0.088	27	A	140	144
	Chicken, roasting, thigh, meat, roasted / Poulet à rôtir, haut de cuisse, viande, rôti	grams	110.4	110.4	Day 3	Lunch - 12:00pm	183.3	26.8	0	0	0	7.596	2.683	82.8	12.1	1.468	22.1	247.3	104.9	17.7	0	0.2975	0.297982	0.07	0.212	6.333	7.728	0	7.728	7.728	0.342	0.298	1.866	0.088	27	A	140	144
	Turkey, broiler, breast, meat and skin, roasted / Dinde à griller, poitrine, viande et peau, rôtie	grams	36	36	Day 1	Lunch - 12:27pm	58.7	10.7	0	0	0	1.468	0.514	30	2.64	0.125	7.475	124	16.1	0	0	0.045	0.032	0.015	0.049	4.283	2.16	0	2.16	2.16	0.084	0.345	0.337	0.022	27	D	140	144
	Chicken, roasting, breast, meat, roasted / Poulet à rôtir, poitrine, viande, rôti	grams	75	75	Day 2	Lunch - 1:00pm	110.2	22.4	0	0	0	1.56	0.414	56.2	9.75	0.81	17.2	177	38.2	6	0	0.2025	0.125	0.046	0.07	7.852	2.25	0	2.25	2.25	0.405	0.232	0.265	0.011	27	A	140	144
	Chicken, broiler, leg, meat, roasted / Poulet à griller, cuisse, viande, rôti	1 food guide serving = 75g / 1 portion guide alimentaire = 75g (75g)	1	75	Day 3	Dinner - 8:00pm	143.2	20.3	0	0	0	6.322	1.718	70.5	9	0.982	18	181.5	68.2	14.2	0	0.2025	0.203	0.056	0.174	4.739	6	0	6	6	0.278	0.24	1.215	0.06	27	A	140	144
	Chicken, broiler, leg, meat and skin, roasted / Poulet à griller, cuisse, viande et peau, rôti	ounces	7	198.45	Day 2	Lunch - 2:30pm	460.4	51.5	0	0	0	26.7	7.382	182.6	23.8	2.639	45.6	446.5	172.7	81.4	0	0.535	0.536	0.135	0.423	12.3	13.9	0	13.9	13.9	0.655	0.595	5.14	0.238	27	B	140	144
	Chicken, broiler, wing, meat and skin, roasted / Poulet à griller, aile, viande et peau, rôti	1 ounce (28.35g)	3	85.05	Day 1	Snack 1 - 9:30pm	246.6	22.8	0	0	0	16.6	4.635	71.4	12.8	1.08	16.2	156.5	69.7	40	0	0.229625	0.23	0.036	0.109	5.654	2.551	0	2.551	2.551	0.357	0.247	3.036	0.128	27	B	140	144
	Chicken, roasting, breast, meat, roasted / Poulet à rôtir, poitrine, viande, rôti	ounces	2	56.7	Day 1	Breakfast - 9:30am	83.3	17	0	0	0	1.179	0.313	42.5	7.371	0.612	13	133.8	28.9	4.536	0	0.1531	0.095	0.035	0.053	5.936	1.701	0	1.701	1.701	0.306	0.176	0.2	0.009	27	A	140	144
	Chicken, roasting, breast, meat, roasted / Poulet à rôtir, poitrine, viande, rôti	grams	102	102	Day 3	Dinner	149.9	30.5	0	0	0	2.122	0.563	76.5	13.3	1.102	23.5	240.7	52	8.16	0	0.275	0.17	0.062	0.095	10.7	3.06	0	3.06	3.06	0.551	0.316	0.36	0.016	27	A	140	144
	Chicken, roasting, breast, meat, roasted / Poulet à rôtir, poitrine, viande, rôti	grams	61	61	Day 3	Lunch - 3:30pm	89.7	18.3	0	0	0	1.269	0.337	45.8	7.93	0.659	14	144	31.1	4.88	0	0.1647	0.102	0.037	0.057	6.386	1.83	0	1.83	1.83	0.329	0.189	0.215	0.009	27	A	140	144
	Chicken, roasting, thigh, meat, roasted / Poulet à rôtir, haut de cuisse, viande, rôti	grams	92	92	Day 2	Dinner - 6:00pm	152.7	22.3	0	0	0	6.33	2.236	69	10.1	1.224	18.4	206.1	87.4	14.7	0	0.2484	0.250536	0.058	0.177	5.277	6.44	0	6.44	6.44	0.285	0.248	1.555	0.074	27	B	140	144
	Chicken, roasting, breast, meat, roasted / Poulet à rôtir, poitrine, viande, rôti	ounces	4	113.4	Day 1	Lunch - 1:00pm	166.7	33.9	0	0	0	2.359	0.626	85	14.7	1.225	26.1	267.6	57.8	9.072	0	0.305	0.189	0.069	0.105	11.9	3.402	0	3.402	3.402	0.612	0.352	0.4	0.017	27	A	140	144
	Chicken, roasting, breast, meat, roasted / Poulet à rôtir, poitrine, viande, rôti	ounces	2	56.7	Day 3	Lunch - 12:45pm	83.3	17	0	0	0	1.179	0.313	42.5	7.371	0.612	13	133.8	28.9	4.536	0	0.1531	0.095	0.035	0.053	5.936	1.701	0	1.701	1.701	0.306	0.176	0.2	0.009	27	A	140	144
	Chicken, roasting, breast, meat, roasted / Poulet à rôtir, poitrine, viande, rôti	ounces	3.5	99.23	Day 1	Lunch - 12:00pm	145.9	29.7	0	0	0	2.064	0.548	74.4	12.9	1.072	22.8	234.2	50.6	7.938	0	0.2675	0.166	0.061	0.092	10.4	2.977	0	2.977	2.977	0.536	0.308	0.35	0.015	27	A	140	144
	Chicken, roasting, breast, meat, roasted / Poulet à rôtir, poitrine, viande, rôti	ounces	3.5	99.23	Day 2	Lunch - 11:45am	145.9	29.7	0	0	0	2.064	0.548	74.4	12.9	1.072	22.8	234.2	50.6	7.938	0	0.2675	0.166	0.061	0.092	10.4	2.977	0	2.977	2.977	0.536	0.308	0.35	0.015	27	A	140	144
	Chicken, roasting, breast, meat, roasted / Poulet à rôtir, poitrine, viande, rôti	ounces	3	85.05	Day 3	Lunch - 12:30pm	125	25.5	0	0	0	1.769	0.469	63.8	11.1	0.919	19.6	200.7	43.4	6.804	0	0.229625	0.142	0.052	0.079	8.904	2.551	0	2.551	2.551	0.459	0.264	0.3	0.013	27	A	140	144
	Chicken, roasting, breast, meat, roasted / Poulet à rôtir, poitrine, viande, rôti	ounces	6.89	195.33	Day 2	Lunch - 12:30pm	287.1	58.5	0	0	0	4.063	1.078	146.5	25.4	2.11	44.9	461	99.6	15.6	0	0.5275	0.326	0.119	0.182	20.4	5.86	0	5.86	5.86	1.055	0.606	0.689	0.03	27	A	140	144
	Turkey, all classes, ground, cooked / Dinde, toutes catégories, hachée, cuite	ounces	8.6	243.81	Day 2	Dinner - 6:30pm	477.9	67.4	0	0	0	21.2	6.98	310.6	203	2.626	46.9	812	204.9	0	0	0.7075	0.829	0.132	0.41	14.1	17.1	0	17.1	17.1	0.363	7.809	4.496	0.295	27	D	140	144
	Chicken, roasting, breast, meat, roasted / Poulet à rôtir, poitrine, viande, rôti	grams	144	144	Day 2	Dinner - 7:00pm	211.7	43.1	0	0	0	2.995	0.795	108	18.7	1.555	33.1	339.8	73.4	11.5	0	0.39	0.24	0.088	0.134	15.1	4.32	0	4.32	4.32	0.778	0.446	0.508	0.022	27	A	140	144
	Chicken, roasting, breast, meat, roasted / Poulet à rôtir, poitrine, viande, rôti	grams	138	138	Day 1	Dinner - 6:00pm	202.9	41.3	0	0	0	2.87	0.762	103.5	17.9	1.49	31.7	325.7	70.4	11	0	0.3725	0.23	0.084	0.128	14.4	4.14	0	4.14	4.14	0.745	0.428	0.487	0.021	27	A	140	144
	Turkey or chicken breast, prepackaged or deli, luncheon meat - smoked	1 slice (1 oz) (28.35g)	3	85.05	Day 2	Lunch - 12:00pm	88.5	14.5	3.581	0.425	2.985	1.412	0.283	36.6	6.804	1.225	17.9	256.9	863.3	8.505	4.848	0	0.077	0.111	0.272	0.094	3.402	0	3.402	3.402	0.109	0.077	0.23	0.014	27	D	140	144
	Chicken, roasting, thigh, meat, roasted / Poulet à rôtir, haut de cuisse, viande, rôti	100ml chopped or diced / 100ml haché ou en dés (57.06g)	2	114.12	Day 3	Dinner - 7:00pm	189.4	27.7	0	0	0	7.851	2.773	85.6	12.6	1.518	22.8	255.6	108.4	18.3	0	0.3075	0.307699	0.072	0.219	6.546	7.988	0	7.988	7.988	0.354	0.308	1.929	0.091	27	B	140	144
	Chicken, roasting, breast, meat and skin, roasted / Poulet à rôtir, poitrine, viande et peau, rôti	grams	290	290	Day 1	Lunch - 1:30pm	545.2	74.9	0	0	0	25.3	6.764	220.4	34.8	3.654	58	611.9	211.7	72.5	0	0.7825	0.87	0.165	0.415	21.5	14.5	0	14.5	14.5	1.015	0.783	4.612	0.217	27	B	140	144
	Chicken, roasting, breast, meat and skin, roasted / Poulet à rôtir, poitrine, viande et peau, rôti	grams	70	70	Day 1	Lunch - 11:30AM	131.6	18.1	0	0	0	6.118	1.633	53.2	8.4	0.882	14	147.7	51.1	17.5	0	0.189	0.21	0.04	0.1	5.193	3.5	0	3.5	3.5	0.245	0.189	1.113	0.052	27	B	140	144
	Turkey, all classes, ground, cooked / Dinde, toutes catégories, hachée, cuite	grams	150	150	Day 3	Dinner - 8:00PM	294	41.4	0	0	0	13.1	4.294	191.1	124.9	1.616	28.9	499.6	126.1	0	0	0.435	0.51	0.081	0.252	8.649	10.5	0	10.5	10.5	0.224	4.804	2.766	0.182	27	D	140	144
	Chicken, roasting, breast, meat and skin, roasted / Poulet à rôtir, poitrine, viande et peau, rôti	ounces	2	56.7	Day 3	Dinner - 7:00PM	106.6	14.7	0	0	0	4.956	1.322	43.1	6.804	0.714	11.3	119.6	41.4	14.2	0	0.1531	0.17	0.032	0.081	4.206	2.835	0	2.835	2.835	0.198	0.153	0.902	0.042	27	B	140	144
	Chicken, roasting, thigh, meat and skin, roasted / Poulet à rôtir, haut de cuisse, viande et peau, rôti	1 thigh / 1 haut de cuisse (119.61g)	2	239.23	Day 2	Dinner - 730PM	583.7	47.9	0	0	0	42.1	8.947	181.8	28.7	3.014	47.8	504.8	174.6	59.8	0	0.645	0.645628	0.136	0.342	17.7	12	0	12	12	0.837	0.646	6.1	0.287	27	B	140	144
	Valbella - Gourmet Liver Pate	grams	116	116	Day 3	Lunch - 2:30pm	309.3	19.3	3.866	0	0	96.7	11.1012	135.3	81.2	6.38	15.08	160.08	734.7	1149.56	2.32	0.928	0	0.0348	0.696	3.828	69.6	0	69.6	69.6	0.0696	3.712	3.19	0.2436	28	B	140	145
	Valbella - Gourmet Liver Pate	grams	92	92	Day 2	Lunch - 1:00pm	245.3	15.3	3.066	0	0	76.7	8.8044	107.3	64.4	5.06	11.96	126.96	582.7	911.72	1.84	0.736	0	0.0276	0.552	3.036	55.2	0	55.2	55.2	0.0552	2.944	2.53	0.1932	28	B	140	145
	Maple Leaf - Natural Selections Low Roasted Beef Shaved Deli Meat	6 slices (129g)	0.333	43	Day 2	Lunch - 2:00pm	20	4.333	0	0	0	0.333	0.361	9.999	0	0.48	7.74	101.05	160	0	0	0	0	0	0.0671	1.176	0	0	0	0	0	0.7095	0.037	0.00645	32	A	40	146
	Maple Leaf - Natural Selections Low Roasted Beef Shaved Deli Meat	6 slices (129g)	0.333	43	Day 3	Lunch - 1:00pm	20	4.333	0	0	0	0.333	0.361	9.999	0	0.48	7.74	101.05	160	0	0	0	0	0	0.0671	1.176	0	0	0	0	0	0.7095	0.037	0.00645	32	A	40	146
	Bologna, chicken, pork	grams	61	61	Day 2	Breakfast	205	6.289	2.556	0	0	18.7	6.016	53.1	119.6	0.683	9.76	98.8	756.4	7.93	8.052	0	0.39	0.038	0.079	2.245	7.93	0	7.93	7.93	0.116	0.305	2.362	0.145	32	A	140	146
	Sausage, chicken and beef, smoked	grams	270	270	Day 3	Lunch - 12:30pm	796.5	50	0	0	0	64.8	19.3	189	29.7	2.916	37.8	375.3	2754	83.7	0	0.041	1.35	0.108	0.324	11	10.8	0	10.8	10.8	0.459	1.026	11.7	0.945	30	A	140	146
	Sausage, pork, fresh, cooked / Saucisse au porc, fraîche, cuite	grams	90	90	Day 1	Lunch - 3:00pm	305.1	17.5	0	0	0	25.5	8.238	75.6	11.7	1.224	15.3	264.6	674.1	10.8	0.63	0.81	0.495	0.265	0.177	5.632	2.7	0	2.7	2.7	0.294	1.062	2.963	0	30	A	140	146
	Sausage, pork, fresh, cooked / Saucisse au porc, fraîche, cuite	grams	144	144	Day 2	Dinner - 6:00pm	488.2	28	0	0	0	40.8	13.2	121	18.7	1.958	24.5	423.4	1079	17.3	1.008	1.3	0.792	0.423	0.284	9.012	4.32	0	4.32	4.32	0.471	1.699	4.74	0	30	A	140	146
	Sausage, pork, fresh, cooked / Saucisse au porc, fraîche, cuite	1 food guide serving = 75g / 1 portion guide alimentaire = 75g (75g)	0.15	11.25	Day 1	Dinner - 6:30pm	38.1	2.186	0	0	0	3.191	1.03	9.45	1.463	0.153	1.912	33.1	84.3	1.35	0.079	0.055	0.062	0.033	0.022	0.704	0.338	0	0.338	0.338	0.037	0.133	0.37	0	30	A	140	146
	Salami, NFS	grams	36	36	Day 1	Dinner	121	7.866	0.864	0	0.346	9.324	3.354	32	5.4	0.562	6.84	113.8	521.6	0	0	0	0.079	0.132	0.129	2.179	1.08	0	1.08	1.08	0.165	0.547	0.812	0.045	213	A	140	146
	Salami, NFS	grams	18	18	Day 2	Lunch	60.5	3.933	0.432	0	0.173	4.662	1.677	16	2.7	0.281	3.42	56.9	260.8	0	0	0	0.04	0.066	0.064	1.09	0.54	0	0.54	0.54	0.083	0.274	0.406	0.023	213	A	140	146
	Sausage, pork, fresh, cooked / Saucisse au porc, fraîche, cuite	grams	19	19	Day 2	Breakfast - 8:30am	64.4	3.692	0	0	0	5.388	1.739	16	2.47	0.258	3.23	55.9	142.3	2.28	0.133	0.17	0.104	0.056	0.037	1.189	0.57	0	0.57	0.57	0.062	0.224	0.625	0	30	A	140	146
	Sausage, pork, fresh, cooked / Saucisse au porc, fraîche, cuite	1 food guide serving = 75g / 1 portion guide alimentaire = 75g (75g)	1	75	Day 1	Breakfast - 9:15am	254.2	14.6	0	0	0	21.3	6.865	63	9.75	1.02	12.8	220.5	561.8	9	0.525	0.68	0.413	0.22	0.148	4.694	2.25	0	2.25	2.25	0.245	0.885	2.469	0	30	A	140	146
	European Style Pepperettes - Schneiders	2 pepperettes (58g)	1	58	Day 2	Snack 1 - 7:30pm	260	17	5	0	2	19	7	45	20	1.44	0	277.24	1140	0	0	0	0	0	0	3.58	0	0	0	0	0.16	0.43	1.73	0.113	213	A	140	146
	Sausage, pork, fresh, cooked / Saucisse au porc, fraîche, cuite	grams	122	122	Day 2	Dinner - 4:40pm	413.6	23.7	0	0	0	34.6	11.2	102.5	15.9	1.659	20.7	358.7	913.8	14.6	0.854	1.1	0.671	0.359	0.24	7.635	3.66	0	3.66	3.66	0.399	1.44	4.016	0	30	A	140	146
	Sausage, pork, fresh, cooked / Saucisse au porc, fraîche, cuite	grams	180	180	Day 3	Dinner	610.2	35	0	0	0	51	16.5	151.2	23.4	2.448	30.6	529.2	1348	21.6	1.26	1.62	0.99	0.529	0.355	11.3	5.4	0	5.4	5.4	0.589	2.124	5.926	0	30	A	140	146
	Pepperoni, pork, beef / Pepperoni, porc, boeuf	5 slices / 5 tranches (27.5g)	3	82.5	Day 3	Dinner	407.6	18.7	0	0	0	36.3	12.3	86.6	18.2	1.336	17.3	230.2	1364	0	0.578	0.19	0	0.293	0.261	3.828	4.125	0	4.125	4.125	0.291	1.427	2.534	0.154	213	A	140	146
	Sausage, pork, fresh, cooked / Saucisse au porc, fraîche, cuite	ounces	3	85.05	Day 3	Breakfast - 10:00am	288.3	16.5	0	0	0	24.1	7.785	71.4	11.1	1.157	14.5	250	637	10.2	0.595	0.77	0.468	0.25	0.168	5.322	2.551	0	2.551	2.551	0.278	1.004	2.8	0	30	A	140	146
	Salami, dry or hard, pork / Salami, sec, porc	1 ounce (28.35g)	1	28.35	Day 1	Dinner - 7:20pm	115.4	6.401	0.454	0	0	9.56	3.371	22.4	3.686	0.369	6.237	107.2	640.7	0	0	0.26	0.062	0.264	0.094	1.588	0.567	0	0.567	0.567	0.156	0.794	0.927	0.079	213	A	140	146
	Grimms - Honey and Garlic Pepperoni	1 stick (50g)	1	50	Day 2	Lunch - 1:30pm	180	8	4	0	4	14	5	45	0	1.44	8	134	420	0	0	0	0	0	0.053	1.73	0	0	0	0	0.078	0.21	0.836	0.055	213	A	140	146
	Polish sausage, pork / Saucisson polonais, porc	grams	62	62	Day 2	Lunch - 12:30pm	202.1	8.742	1.011	0	0	17.8	6.405	43.4	7.44	0.893	8.68	146.9	543.1	0	0.62	0.71	0.136	0.311	0.092	2.135	1.24	0	1.24	1.24	0.118	0.608	1.73	0.18	30	A	140	146
	Polish sausage, pork / Saucisson polonais, porc	grams	66	66	Day 3	Lunch - 2:30pm	215.2	9.306	1.076	0	0	19	6.818	46.2	7.92	0.95	9.24	156.4	578.2	0	0.66	0.76	0.145	0.331	0.098	2.272	1.32	0	1.32	1.32	0.125	0.647	1.841	0.191	30	A	140	146
	Fantino & Mondello - Dry Sliced Pepperoni	grams	23	23	Day 3	Breakfast - 11:00am	92	5.367	0.767	0.529	0.74	7.667	3.067	23	15.3	0.828	5.75	222.77	444.7	16.1	0	0	0.297	0.052	0.039	0.759	0	0	0	0	0.022	0	0.73	0.073	213	A	140	146
	Freybe - Pepper Salami (Sliced)	grams	21	21	Day 3	Breakfast - 11:00am	78	5.4	0.6	0	0	6	2.4	15	0	0.648	0	53.13	276	0	0	0	0	0.116	0	0.683	0	0	0	0	0.074	0.183	0.407	0.088	213	A	140	146
	Chorizo, pork and beef / Chorizo, porc et boeuf	1 food guide serving = 75g / 1 portion guide alimentaire = 75g (75g)	0.333	24.98	Day 1	Dinner - 7:00pm	113.6	6.019	0.465	0	0	9.558	3.591	22	1.998	0.397	4.496	99.4	308.4	0	0	0.38	0.055	0.157	0.075	1.281	0.5	0	0.5	0.5	0.132	0.5	0.732	0.095	30	A	140	146
	Johnsonville - Country garlic sausage	1 sausage (100g)	1	100	Day 2	Dinner - 6:00pm	300	15	3	0	1	26	9	65	20	0.72	5.3816	91.078	810	0	0.3844	0.4402	0.08432	0.19282	0.05704	1.3237	0.7688	0	0.7688	0.7688	0.07316	0.37696	1.0726	0.1116	30	A	140	146
	Johnsonville - Country garlic sausage	1 sausage (100g)	1	100	Day 3	Dinner - 6:00pm	300	15	3	0	1	26	9	65	20	0.72	5.3816	91.078	810	0	0.3844	0.4402	0.08432	0.19282	0.05704	1.3237	0.7688	0	0.7688	0.7688	0.07316	0.37696	1.0726	0.1116	30	A	140	146
	Mastro - Salami With Prosciutto	4 slices (30g)	1	30	Day 2	Breakfast - 7:00am	90	9	0	0	0	5	2	25	0	0.36	5.7	175	600	0	18	0	0.0658333	0.11	0.1075	1.81583	0.9	0	0.9	0.9	0.1375	0.455833	0.676667	0.0375	213	A	140	146
	Mastro - Salami With Prosciutto	4 slices (30g)	1	30	Day 3	Breakfast - 7:00am	90	9	0	0	0	5	2	25	0	0.36	5.7	175	600	0	18	0	0.0658333	0.11	0.1075	1.81583	0.9	0	0.9	0.9	0.1375	0.455833	0.676667	0.0375	213	A	140	146
	Turkey and pork sausage, fresh, bulk, patty or link, cooked / Saucisse, dinde et porc, fraîche, en vrac, gallette ou chapelet, cuite	1 patty / 1 boulette (25g)	1	25	Day 1	Breakfast - 9:15am	76.8	5.675	0.175	0	0	5.75	1.988	21	8	0.405	4.75	84.2	219.5	0	0.275	0.495	0.098	0.128	0.062	1.055	1	0	1	1	0.085	0.315	0.69	0.095	30	A	140	146
	Ham, sliced, regular, (approximately 11% fat) / Jambon, tranché, (approximative 11% M.G.)	1 food guide serving = 75g / 1 portion guide alimentaire = 75g (75g)	1	75	Day 1	Breakfast - 8:00am	122.2	12.5	2.872	0.975	0	6.45	2.202	42.8	18	0.765	16.5	215.2	978	0	3	0.545	0.06	0.47	0.134	2.178	5.25	0	5.25	5.25	0.247	0.315	0.518	0.045	32	A	140	146
	Ham, sliced, regular, (approximately 11% fat) / Jambon, tranché, (approximative 11% M.G.)	1 food guide serving = 75g / 1 portion guide alimentaire = 75g (75g)	1	75	Day 1	Lunch - 1:00pm	122.2	12.5	2.872	0.975	0	6.45	2.202	42.8	18	0.765	16.5	215.2	978	0	3	0.545	0.06	0.47	0.134	2.178	5.25	0	5.25	5.25	0.247	0.315	0.518	0.045	32	A	140	146
	Sausage, pork, fresh, cooked / Saucisse au porc, fraîche, cuite	ounces	3.2	90.72	Day 1	Dinner	307.5	17.6	0	0	0	25.7	8.304	76.2	11.8	1.234	15.4	266.7	679.5	10.9	0.635	0.8175	0.499	0.267	0.179	5.677	2.722	0	2.722	2.722	0.297	1.07	2.987	0	30	A	140	146
	Sausage, pork, fresh, cooked / Saucisse au porc, fraîche, cuite	ounces	1.17	33.17	Day 3	Lunch - 12:32pm	112.4	6.445	0	0	0	9.407	3.036	27.9	4.312	0.451	5.639	97.5	248.4	3.98	0.232	0.2975	0.182	0.098	0.065	2.076	0.995	0	0.995	0.995	0.108	0.391	1.092	0	30	A	140	146
	Salami, dry or hard, pork / Salami, sec, porc	grams	48	48	Day 1	Lunch - 12:27pm	195.4	10.8	0.768	0	0	16.2	5.707	37.9	6.24	0.624	10.6	181.4	1085	0	0	0.4325	0.106	0.446	0.158	2.688	0.96	0	0.96	0.96	0.264	1.344	1.57	0.134	213	A	140	146
	Sausage, pork, fresh, cooked / Saucisse au porc, fraîche, cuite	grams	70	70	Day 2	Dinner - 7:20pm	237.3	13.6	0	0	0	19.9	6.407	58.8	9.1	0.952	11.9	205.8	524.3	8.4	0.49	0.63	0.385	0.206	0.138	4.381	2.1	0	2.1	2.1	0.229	0.826	2.304	0	30	A	140	146
	Sausage, pork, fresh, cooked / Saucisse au porc, fraîche, cuite	grams	70	70	Day 3	Lunch - 12:00pm	237.3	13.6	0	0	0	19.9	6.407	58.8	9.1	0.952	11.9	205.8	524.3	8.4	0.49	0.63	0.385	0.206	0.138	4.381	2.1	0	2.1	2.1	0.229	0.826	2.304	0	30	A	140	146
	Sausage, pork, fresh, cooked / Saucisse au porc, fraîche, cuite	grams	122	122	Day 1	Dinner - 7:00pm	413.6	23.7	0	0	0	34.6	11.2	102.5	15.9	1.659	20.7	358.7	913.8	14.6	0.854	1.0975	0.671	0.359	0.24	7.635	3.66	0	3.66	3.66	0.399	1.44	4.016	0	30	A	140	146
	Sausage, pork, fresh, cooked / Saucisse au porc, fraîche, cuite	grams	122	122	Day 3	Dinner - 7:30pm	413.6	23.7	0	0	0	34.6	11.2	102.5	15.9	1.659	20.7	358.7	913.8	14.6	0.854	1.0975	0.671	0.359	0.24	7.635	3.66	0	3.66	3.66	0.399	1.44	4.016	0	30	A	140	146
	Sausage, pork, fresh, cooked / Saucisse au porc, fraîche, cuite	grams	122	122	Day 3	Lunch - 12:45pm	413.6	23.7	0	0	0	34.6	11.2	102.5	15.9	1.659	20.7	358.7	913.8	14.6	0.854	1.0975	0.671	0.359	0.24	7.635	3.66	0	3.66	3.66	0.399	1.44	4.016	0	30	A	140	146
	Sausage, pork, fresh, cooked / Saucisse au porc, fraîche, cuite	grams	136	136	Day 2	Dinner - 6:30pm	461	26.4	0	0	0	38.6	12.4	114.2	17.7	1.85	23.1	399.8	1019	16.3	0.952	1.225	0.748	0.4	0.268	8.511	4.08	0	4.08	4.08	0.445	1.605	4.477	0	30	A	140	146
	Sausage, pork, fresh, cooked / Saucisse au porc, fraîche, cuite	1 food guide serving = 75g / 1 portion guide alimentaire = 75g (75g)	0.125	9.38	Day 1	Dinner - 6:30pm	31.8	1.822	0	0	0	2.659	0.858	7.875	1.219	0.128	1.594	27.6	70.2	1.125	0.066	0.084375	0.052	0.028	0.018	0.587	0.281	0	0.281	0.281	0.031	0.111	0.309	0	30	A	140	146
	Italian sausage, fresh pork, cooked / Saucisse italienne, porc frais, cuite	grams	90	90	Day 2	Dinner - 7:30pm	310.5	17.2	3.843	0.09	0.774	24.6	8.69	51.3	18.9	1.287	16.2	273.6	1086	9	0.09	0.9225	0.225	0.561	0.21	3.748	4.5	0	4.5	4.5	0.297	1.17	2.733	0.423	30	A	140	146
	Maple Leaf Natural Selections - Cdn - Oven Roasted Turkey Breast Slices	4 slices (70g)	0.5	35	Day 2	Lunch - 11:00am	35	7.5	0.58	0.2	0.12	0.46	0.161	15	218.8	0.18	7	131	280	1	0.6	0	0.05	0.012	0.025	2.604	1	0	1	1	0.078	0.26	0.108	0.004	32	A	140	146
	Freybe - Turkey and Chicken Pepperoni	1 stick (25g)	2	50	Day 2	Dinner - 7:00pm	120	10	1.42857	0	0	14.2857	2	30	0	0.72	0	170	500	0	0	0	0	0.27619	0	1.62619	0	0	0	0	0.17619	0.435714	0.969048	0.209524	213	A	140	146
	Maple Leaf - Flakes of Chicken	1/3 can (52g)	3	156	Day 3	Lunch - 4:00pm	210	24	0.15	0	0	12	3	90	60	2.161	18	390	900	51	0	0.45	0	0.0225	0.189	14.5725	6	0	6	6	0.525	0.435	2.925	0.1365	32	A	140	146
	Sausage, pork, fresh, cooked / Saucisse au porc, fraîche, cuite	ounces	1	28.35	Day 1	Dinner - 6:00pm	96.1	5.508	0	0	0	8.04	2.595	23.8	3.686	0.386	4.82	83.3	212.3	3.402	0.198	0.255	0.156	0.083	0.056	1.774	0.85	0	0.85	0.85	0.093	0.335	0.933	0	30	A	140	146
	Turkey and pork sausage, fresh, bulk, patty or link, cooked / Saucisse, dinde et porc, fraîche, en vrac, gallette ou chapelet, cuite	ounces	1.75	49.61	Day 1	Breakfast - 10:30am	152.3	11.3	0.347	0	0	11.4	3.944	41.7	15.9	0.804	9.426	167.2	435.6	0	0.546	0.98	0.193	0.253	0.124	2.094	1.984	0	1.984	1.984	0.169	0.625	1.369	0.189	30	A	140	146
	3 Rivers - Pork Sausage, Minis (Breakfast)	1 sausage (48g)	2	96	Day 3	Breakfast - 8:30am	240	10	8	0	0	18	8	50	11.52	1.44	13.44	227.491	680	0	0.96	1.10545	0.210909	0.481455	0.142545	3.30473	1.92	0	1.92	1.92	0.181818	0.941091	2.67782	0.277818	30	A	140	146
	Polish sausage, pork / Saucisson polonais, porc	1 ounce (28.35g)	1	28.35	Day 1	Dinner - 6:15pm	92.4	3.997	0.462	0	0	8.142	2.929	19.8	3.402	0.408	3.969	67.2	248.3	0	0.284	0.325	0.062	0.142	0.042	0.976	0.567	0	0.567	0.567	0.054	0.278	0.791	0.082	30	A	140	146
	Sausage, pork, fresh, cooked / Saucisse au porc, fraîche, cuite	grams	126	126	Day 1	Dinner - 6:30pm	427.1	24.5	0	0	0	35.7	11.5	105.8	16.4	1.714	21.4	370.4	943.7	15.1	0.882	1.135	0.693	0.37	0.248	7.885	3.78	0	3.78	3.78	0.412	1.487	4.148	0	30	A	140	146
	Natural Selections - Black Forest Ham	4 slices (64g)	0.5	32	Day 2	Dinner - 7:30PM	30	6.5	0	0	0	0.5	0.2	15	7.68	0.18	7.04	91.8187	285	0	1.28	0.232533	0.0256	0.200533	0.0571733	0.92928	2.24	0	2.24	2.24	0.105387	0.1344	0.221013	0.0192	32	A	140	146
	Maple Leaf Natural Selections - Cdn - Oven Roasted Turkey Breast Slices	4 slices (70g)	0.5	35	Day 3	Lunch - 12:00PM	35	7.5	0.58	0.2	0.12	0.46	5.469	15	218.8	0.18	7	131	280	1	0.6	0	0.05	0.012	0.025	2.604	1	0	1	1	0.078	0.26	0.108	0.004	32	A	140	146
	Boneless Herring Fillets Seafood Snacks Kippered - Brunswick	1 can (85g)	1	85	Day 1	Lunch - 2:45pm	138.1	17	0	0	0	11	2.125	69.1	63.8	1.912	39.1	329.4	488.8	40	1.2	1.87	1.31	0.107	0.271	3.74	11.9	0	11.9	11.9	0.35	15.895	0.5	2	34	B	140	147
	Tilapia, baked or broiled / Tilapia, au four ou grillé	ounces	2.6	73.71	Day 3	Dinner - 6:30pm	95.1	19.3	0	0	0	1.953	0.693	42	10.3	0.509	25.1	280.1	41.3	0	0	2.96	0.582	0.069	0.054	3.498	4.423	0	4.423	4.423	0.091	1.371	0.21	0.033	34	A	140	147
	Fish, Snapper, baked or broiled (dry heat)	grams	130	130	Day 2	Dinner - 7:00pm	166.4	34.2	0	0		2.236	0.474	61.1	52	0.312	48.1	678.6	74.1	45.5	2.08	17.03	0.832	0.069	0.005	0.45	7.8	0	7.8	7.8	0.598	4.55	0.032	0.0065	34	A	140	147
	Fish, tilapia, cooked, dry heat	grams	142	142	Day 2	Dinner - 7:00pm	181.8	37.1	0	0	0	3.763	1.335	80.9	19.9	0.98	48.3	539.6	79.5	0	0	0.13	1.122	0.132	0.104	6.738	8.52	0	8.52	8.52	0.175	2.641	0.405	0.064	34	A	140	147
	Salmon, chinook (spring), baked or broiled / Saumon, quinnat (printemps, royal), au four ou grillé	grams	120	120	Day 3	Dinner - 7:30pm	277.2	30.9	0	0	0	16.1	3.857	102	33.6	1.092	146.4	606	72	178.8	4.92	15.48	1.884	0.053	0.185	12.1	42	0	42	42	0.554	3.444	0.163	0.132	34	A	140	147
	Salmon, chinook (spring), baked or broiled / Saumon, quinnat (printemps, royal), au four ou grillé	grams	4	4	Day 2	Dinner - 7:30pm	9.24	1.029	0	0	0	0.535	0.129	3.4	1.12	0.036	4.88	20.2	2.4	5.96	0.164	0.52	0.063	0.002	0.006	0.402	1.4	0	1.4	1.4	0.018	0.115	0.005	0.004	34	A	140	147
	Salmon, chinook (spring), baked or broiled / Saumon, quinnat (printemps, royal), au four ou grillé	ounces	3	85.05	Day 3	Dinner - 5:30pm	196.5	21.9	0	0	0	11.4	2.734	72.3	23.8	0.774	103.8	429.5	51	126.7	3.487	10.966	1.335	0.037	0.131	8.543	29.8	0	29.8	29.8	0.393	2.441	0.116	0.094	34	A	140	147
	Tuna, light, canned in water, drained, unsalted / Thon, chair pale, conserve, dans l'eau, égoutté, sans sel	1 can / 1 cannette / boîte de conserve (165g)	1	165	Day 1	Lunch - 12:50pm	191.4	42.1	0	0	0	1.353	0.38	49.5	18.2	2.524	44.6	391	82.5	0	0	2	0.544	0.053	0.122	21.9	6.6	0	6.6	6.6	0.578	4.934	0.015	0	34	A	140	147
	Fish, NS as to type, cooked, NS as to cooking method	grams	77	77	Day 3	Dinner - 6:30pm	100.9	18.3	0	0	0	2.402	0.482	66.2	13.9	0.331	43.9	286.4	330.3	22.3	0.154	0.462	0.601	0.072	0.081	1.961	4.62	0	4.62	4.62	0.116	3.434	0.028	0.018	34	A	140	147
	Salmon, chinook (spring), baked or broiled / Saumon, quinnat (printemps, royal), au four ou grillé	ounces	3.2	90.72	Day 1	Dinner - 7:00pm	209.6	23.3	0	0	0	12.1	2.916	77.1	25.4	0.826	110.7	458.1	54.4	135.2	3.72	11.7	1.424	0.04	0.14	9.113	31.8	0	31.8	31.8	0.419	2.604	0.123	0.1	34	A	140	147
	Tuna, canned, NS as to oil or water pack	grams	85	85	Day 2	Lunch - 12:30pm	105.4	22	0	0	0	1.326	0.309	24.7	9.35	1.292	23	198.9	289	15.3	0	1.7	0.323	0.028	0.067	11.2	3.4	0	3.4	3.4	0.277	2.474	0.235	0.008	34	A	140	147
	Flatfish (flounder or sole or plaice), baked or broiled / Poisson plat (plie ou flet ou sole), cuit au four ou grillé	grams	60	60	Day 3	Dinner - 6:30pm	70.2	14.5	0	0	0	0.918	0.218	40.8	10.8	0.204	34.8	206.4	63	7.8	0	0.89	0.396	0.048	0.068	1.307	5.4	0	5.4	5.4	0.144	1.506	0.008	0.01	34	A	140	147
	Oysters, smoked	1 oyster (5g)	2	10	Day 2	Lunch - 2:00pm	10.9	1.135	0.63	0	0	0.396	0.124	8.5	7.3	1.073	7.6	25.1	86.4	4.8	0.6	0	0.137	0.016	0.015	0.222	1.6	0	1.6	1.6	0.01	3.133	0.009	0.008	35	A	140	147
	Salmon, chinook (spring), baked or broiled / Saumon, quinnat (printemps, royal), au four ou grillé	ounces	3	85.05	Day 1	Dinner - 4:45pm	196.5	21.9	0	0	0	11.4	2.734	72.3	23.8	0.774	103.8	429.5	51	126.7	3.487	10.966	1.335	0.037	0.131	8.543	29.8	0	29.8	29.8	0.393	2.441	0.116	0.094	34	A	140	147
	Tuna, yellowfin (albacore, ahi), fresh, raw / Thon à nageoires jaunes (albacore), frais, cru	grams	5	5	Day 1	Lunch - 1:30pm	5.4	1.169	0	0	0	0.048	0.012	2.25	0.8	0.037	2.5	22.2	1.85	0.9	0.05	0.14	0.025	0.022	0.002	0.49	0.1	0	0.1	0.1	0.045	0.026	0	0.001	34	A	140	147
	Tuna, yellowfin (albacore, ahi), fresh, raw / Thon à nageoires jaunes (albacore), frais, cru	grams	60	60	Day 2	Lunch	64.8	14	0	0	0	0.57	0.141	27	9.6	0.438	30	266.4	22.2	10.8	0.6	1.65	0.3	0.26	0.028	5.88	1.2	0	1.2	1.2	0.54	0.312	0.005	0.007	34	A	140	147
	Salmon, native, king or chinook, smoked, canned / Saumon, autochtone, royal ou quinnat, fumé, conserve	grams	43	43	Day 3	Lunch	64.5	9.976	0	0	0	2.537	0.639	16.77	25.8	0.774	12.9	129	288.96	41.3	0	4.515	0.688	0.004	0.043	3.655	8.6	0	8.6	8.6	0.16	1.89	0.025	0.021	34	A	140	147
	Oysters, smoked	grams	85	85	Day 2	Lunch - 4:00pm	92.6	9.648	5.355	0	0	3.366	1.057	72.2	62	9.12	64.6	213.4	734.4	40.8	5.1	0	1.164	0.137	0.13	1.889	13.6	0	13.6	13.6	0.085	26.6	0.079	0.068	35	A	140	147
	Fish, NS as to type, steamed	1 cup, cooked, flaked (136g)	1	136	Day 1	Dinner	189	35.8	0	0	0	3.944	0.559	55.8	80.2	1.442	129.2	658.2	84.3	65.3	0	0.816	1.469	0.083	0.116	8.557	16.3	0	16.3	16.3	0.473	1.727	0.052	0.112	34	A	140	147
	Tuna, light, canned in water, drained, unsalted / Thon, chair pale, conserve, dans l'eau, égoutté, sans sel	grams	100	100	Day 3	Lunch - 12:10pm	116	25.5	0	0	0	0.82	0.23	30	11	1.53	27	237	50	0	0	1.21	0.33	0.032	0.074	13.3	4	0	4	4	0.35	2.99	0.009	0	34	A	140	147
	Shrimp, mixed species, boiled or steamed / Crevette, espèces diverses, à vapeur ou bouillies	grams	138	138	Day 3	Dinner - 7:00pm	136.6	28.9	0	0	0	1.49	0.399	269.1	53.8	4.264	46.9	251.2	309.1	93.8	3.036	0.15	1.904	0.043	0.044	3.574	11.7	0	5.52	5.52	0.175	2.056	0.029	0.017	35	A	140	147
	Shrimp, baked or broiled - stir fry	grams	407	407	Day 1	Breakfast	630.9	99.6	4.558	0	0	20.8	3.923	744.8	256.4	11.8	183.2	911.7	2125	350	9.361	0	6.756	0.126	0.138	11.9	12.2	0	12.2	12.2	0.484	5.413	3.529	0.379	35	A	140	147
	Shrimp, baked or broiled - stir fry	grams	387	387	Day 1	Dinner - 5:00pm	599.8	94.7	4.334	0	0	19.8	3.731	708.2	243.8	11.3	174.2	866.9	2020	332.8	8.901	0	6.424	0.12	0.132	11.3	11.6	0	11.6	11.6	0.461	5.147	3.355	0.36	35	A	140	147
	Shrimp, baked or broiled - stir fry	grams	100	100	Day 2	Dinner - 6:30pm	155	24.5	1.12	0	0	5.11	0.964	183	63	2.91	45	224	522	86	2.3	0	1.66	0.031	0.034	2.921	3	0	3	3	0.119	1.33	0.867	0.093	35	A	140	147
	Tuna, light, canned with oil, drained, salted / Thon, chair pale, conserve, dans l'huile, égoutté, salé	grams	82	82	Day 1	Lunch - 12:30pm	162.4	23.9	0	0	0	6.732	1.258	14.8	10.7	1.14	25.4	169.7	290.3	18.9	0	0.755	0.713	0.031	0.098	10.2	4.1	0	4.1	4.1	0.09	1.804	2.2	0.061	34	B	140	147
	Flatfish (flounder or sole or plaice), baked or broiled / Poisson plat (plie ou flet ou sole), cuit au four ou grillé	grams	60	60	Day 3	Dinner - 6:30pm	70.2	14.5	0	0	0	0.918	0.218	40.8	10.8	0.204	34.8	206.4	63	7.8	0	0.885	0.396	0.048	0.068	1.307	5.4	0	5.4	5.4	0.144	1.506	0.008	0.01	34	A	140	147
	Oysters, smoked	1 oyster (5g)	2	10	Day 2	Lunch - 2:00pm	10.9	1.135	0.63	0	0	0.396	0.124	8.5	7.3	1.073	7.6	25.1	86.4	4.8	0.6	0	0.137	0.016	0.015	0.222	1.6	0	1.6	1.6	0.01	3.133	0.009	0.008	35	A	140	147
	Shrimp, mixed species, boiled or steamed / Crevette, espèces diverses, à vapeur ou bouillies	grams	68	68	Day 2	Dinner - 7:20pm	67.3	14.2	0	0	0	0.734	0.197	132.6	26.5	2.101	23.1	123.8	152.3	46.2	1.496	0.07225	0.938	0.021	0.022	1.761	5.78	0	2.72	2.72	0.086	1.013	0.014	0.008	35	A	140	147
	Shrimp, mixed species, boiled or steamed / Crevette, espèces diverses, à vapeur ou bouillies	grams	68	68	Day 3	Lunch - 12:00pm	67.3	14.2	0	0	0	0.734	0.197	132.6	26.5	2.101	23.1	123.8	152.3	46.2	1.496	0.07225	0.938	0.021	0.022	1.761	5.78	0	2.72	2.72	0.086	1.013	0.014	0.008	35	A	140	147
	Salmon, chinook (spring), baked or broiled / Saumon, quinnat (printemps, royal), au four ou grillé	grams	143	143	Day 1	Dinner - 7:00pm	330.3	36.8	0	0	0	19.1	4.596	121.6	40	1.301	174.5	722.1	85.8	213.1	5.863	18.4475	2.245	0.063	0.22	14.4	50	0	50	50	0.661	4.104	0.194	0.157	34	B	140	147
	Salmon, chinook (spring), baked or broiled / Saumon, quinnat (printemps, royal), au four ou grillé	grams	46	46	Day 2	Dinner - 6:30pm	106.3	11.8	0	0	0	6.155	1.478	39.1	12.9	0.419	56.1	232.3	27.6	68.5	1.886	5.935	0.722	0.02	0.071	4.621	16.1	0	16.1	16.1	0.213	1.32	0.063	0.051	34	B	140	147
	Boston Pizza - Smart Eats Wild Cedar Salmon	1 serving (425g)	1	425	Day 1	Dinner - 5:00pm	380	38	16	6.001	4.998	18	2.002	85	100	3.6	518.5	2146.25	810	633.25	30	55.25	6.69375	0.2125	0.6375	42.7125	148.75	0	148.75	148.75	1.9125	12.2188	0.53125	0.425	34	A	140	147
	Flatfish (flounder or sole or plaice), baked or broiled / Poisson plat (plie ou flet ou sole), cuit au four ou grillé	grams	102	102	Day 2	Lunch - 1:00pm	119.3	24.6	0	0	0	1.561	0.37	69.4	18.4	0.347	59.2	350.9	107.1	13.3	0	1.5025	0.673	0.082	0.116	2.223	9.18	0	9.18	9.18	0.245	2.56	0.014	0.016	34	A	140	147
	Trident Seafoods - Wild Pacific Salmon Burger Patty	1 serving (91g)	1	91	Day 2	Dinner - 7:00pm	180	20	2	0	0	9	1	60	20	0.819	16	459.55	330	135.59	1.2	11.83	1.43325	0.0455	0.1365	9.1455	31.85	0	31.85	31.85	0.4095	2.61625	0.11375	0.091	34	B	140	147
	Shrimp, mixed species, boiled or steamed / Crevette, espèces diverses, à vapeur ou bouillies	1 large / 1 gros (5.5g)	10	55	Day 2	Dinner - 5:30pm	54.4	11.5	0	0	0	0.594	0.159	107.2	21.4	1.7	18.7	100.1	123.2	37.4	1.21	0.05845	0.759	0.017	0.018	1.424	4.675	0	2.2	2.2	0.07	0.82	0.012	0.007	35	A	140	147
	Salmon, chinook (spring), baked or broiled / Saumon, quinnat (printemps, royal), au four ou grillé	grams	252	252	Day 3	Dinner - 7:15pm	582.1	64.8	0	0	0	33.7	8.099	214.2	70.6	2.293	307.4	1273	151.2	375.5	10.3	32.5	3.956	0.111	0.388	25.3	88.2	0	88.2	88.2	1.164	7.232	0.343	0.277	34	B	140	147
	Shrimp, mixed species, raw / Crevette, espèces diverses, crues	grams	113	113	Day 1	Dinner - 6:43pm	119.8	23	1.028	0	0	1.955	0.371	171.8	58.8	2.723	41.8	209	167.2	61	2.26	0.113	1.243	0.032	0.038	2.884	9.04	0	3.39	3.39	0.118	1.311	0.032	0.016	35	A	140	147
	Shrimp, mixed species, raw / Crevette, espèces diverses, crues	grams	113	113	Day 2	Lunch - 11:39am	119.8	23	1.028	0	0	1.955	0.371	171.8	58.8	2.723	41.8	209	167.2	61	2.26	0.113	1.243	0.032	0.038	2.884	9.04	0	3.39	3.39	0.118	1.311	0.032	0.016	35	A	140	147
	Tuna, light, canned in water, drained, unsalted / Thon, chair pale, conserve, dans l'eau, égoutté, sans sel	grams	42	42	Day 3	Lunch - 11:44am	48.7	10.7	0	0	0	0.344	0.097	12.6	4.62	0.643	11.3	99.5	21	0	0	0.5075	0.139	0.013	0.031	5.578	1.68	0	1.68	1.68	0.147	1.256	0.004	0	34	B	140	147
	Tuna, light, canned in water, drained, unsalted / Thon, chair pale, conserve, dans l'eau, égoutté, sans sel	1 can / 1 cannette / boîte de conserve (165g)	0.255	41.99	Day 2	Dinner - 6:26pm	48.7	10.7	0	0	0	0.344	0.097	12.6	4.619	0.642	11.3	99.5	21	0	0	0.5075	0.139	0.013	0.031	5.577	1.68	0	1.68	1.68	0.147	1.256	0.004	0	34	B	140	147
	Snacks, beef jerky, chopped and formed / Grignotises, jerky de boeuf, haché et formé	grams	10	10	Day 2	Breakfast - 7:00am	40.7	3.32	1.104	0.18	0.9	2.56	1.085	4.8	2	0.542	5.1	59.7	221.3	0	0	0.15565	0.049	0.015	0.014	0.173	13.4	0	13.4	13.4	0.018	0.099	0.081	0.018	210	A	40	148
	Homemade - Butter Chicken Curry	1 cup (226.7g)	0.75	170.02	Day 3	Lunch - 11:00am	406.5	25.5	8.25	0.742358	10.3856	30.8	4.45415	51.0371	50.7773	1.54782	20.3109	204.379	702	3.8083	0	0.126943	1.62576	0	0.0887118	4.79192	11.4249	0	11.4249	11.4249	0.317358	0.139563	6.79629	0.85	211	A	140	148
	Generic - Butter Chicken and Rice	grams	458	458	Day 3	Lunch - 12:00pm	687	50.4	59.5	6.105	6.105	27.5	6.105	320.6	122.1	5.496	73.173	736.304	1496	13.7199	0	0.457331	5.85705	0	0.319597	17.2636	41.1598	0	41.1598	41.1598	1.14333	0.502797	24.4846	3.06225	211	A	140	148
	State and Main - Butter Chicken	1 serving (685g)	0.5	342.5	Day 3	Lunch - 12:30pm	700	38.5	62.5	2	27.98	32.5	12	137.5	136.8	4.17	54.72	550.62	1090	10.26	0	0.342	4.38	0	0.239	12.91	30.78	0	30.78	30.78	0.855	0.376	18.31	2.29	211	A	140	148
	Beef and vegetables (including carrots, broccoli, and/or dark-green leafy (no potatoes)), soy-based sauce (mixture)	grams	208	208	Day 3	Breakfast - 11:00am	197.6	19.2	9.277	3.12	2.413	9.36	2.203	29.1	45.8	2.038	29.1	428.5	374.4	453.4	33.5	0	1.893	0.1	0.2	3.482	66.6	0	66.6	66.6	0.337	1.165	3.151	0.464	210	A	140	148
	Beef and vegetables (including carrots, broccoli, and/or dark-green leafy (no potatoes)), soy-based sauce (mixture)	grams	194	194	Day 2	Lunch - 10:45am	184.3	17.9	8.652	2.91	2.25	8.73	2.054	27.2	42.7	1.901	27.2	399.6	349.2	422.9	31.2	0	1.765	0.093	0.186	3.248	62.1	0	62.1	62.1	0.314	1.086	2.939	0.433	210	A	140	148
	Beef and vegetables (including carrots, broccoli, and/or dark-green leafy (no potatoes)), soy-based sauce (mixture)	ounces	4.792	135.85	Day 1	Lunch - 1:00pm	129.1	12.5	6.059	2.038	1.576	6.113	1.439	19	29.9	1.331	19	279.9	244.5	296.2	21.9	0	1.236	0.065	0.13	2.274	43.5	0	43.5	43.5	0.22	0.761	2.058	0.303	210	A	140	148
	Pizza 73 - Gluten Free Boneless Chicken wings	grams	3.3	577.5	Day 3	Dinner - 6:30pm	1221	79.2	128.7	6.6	3.29736	42.9	4.94934	247.5	66	2.37336	138.48	1511.74	1782	33	60.786	0	4.25	0.53	1.402	19.92	46.16	0	46.16	46.16	1.119	2.65	16.05	2.4	211	A	140	148
	PINTY - Buffalo chicken flings	grams	83	83	Day 3	Lunch - 3:00pm	132.8	13.3	6.64	0	0	6.64	1.245	37.4	0	0.299	19.92	208.3	473.1	0	0	0	0.9296	0	0.169	4.968	4.98	4.15	4.98	11.62	0.123	0.274	4.96	0.35	211	A	140	148
	PINTY - Buffalo chicken flings	grams	60	60	Day 2	Lunch - 2:00pm	96	9.6	4.8	0	0	4.8	0.9	27	0	0.216	14.4	150.6	342	0	0	0	0.672	0	0.1224	3.591	3.6	3.15	3.6	8.82	0.0888	0.198	3.592	2.15	211	A	140	148
	Meat loaf made with chicken or turkey - chicken or turkey meatball, with breading or NS as to breading, no sauce	grams	172	172	Day 1	Dinner - 6:00pm	290.7	34.8	12.8	0.86	3.302	10.2	3.01	146.2	87.7	2.374	37.8	373.2	786	55	5.848	0	0.499	0.175	0.363	10.6	34.4	15.5	18.9	44.7	0.547	0.533	1.84	0.114	211	A	140	148
	Chicken or turkey, noodles, and vegetables (including carrots, broccoli, and/or dark-green leafy), cream sauce, white sauce, or mushroom soup-based sauce (mixture)	1 cup (224g)	1.5	336	Day 1	Dinner - 6:45pm	376.3	24.9	41.5	4.032	6.25	12.1	3.121	84	90.7	3.562	50.4	457	913.9	772.8	3.36	0	1.949	0.447	0.376	7.009	110.9	84	26.9	168	0.36	0.336	2.611	0.091	211	A	140	148
	Beef stew with potatoes and vegetables (including carrots, broccoli, and/or dark-green leafy), tomato-based sauce	1 cup (252g)	2	504	Day 3	Dinner - 7:10pm	443.5	27.8	39	7.56	5.998	19.5	7.293	70.6	70.6	4.082	75.6	1079	1583	408.2	27.2	0	1.008	0.333	0.328	7.081	60.5	5.04	60.5	65.5	0.736	1.814	1.507	0.312	210	A	140	148
	Ham and vegetables (including carrots, broccoli, and/or dark- green leafy (no potatoes)), no sauce (mixture)	1 cup (162g)	1	162	Day 3	Lunch - 1:00pm	176.6	17	6.399	1.944	2.738	9.38	3.259	45.4	47	1.183	25.9	426.1	1213	623.7	18	0	1.004	0.465	0.209	4.402	13	0	13	13	0.421	0.421	0.959	0.126	210	B	140	148
	Turkey, Breaded Strip-Shaped Patties w/USDA commodity meat, cooked/Pierre produc	1 piece (27g)	1	27	Day 1	Lunch - 1:30pm	93.7	4.922	2.759	0.081	0.108	6.953	1.385	15.4	7.56	0.513	4.05	48.1	153.1	0	0	0.041	0.751	0.05	0.056	1.148	5.94	0	0	0	0.058	0.057	1.08	0.065	211	B	140	148
	Pork chop, breaded or floured, fried, NS as to fat eaten	ounces	3	85.05	Day 2	Dinner	269.6	18.1	11.7	0.765	1.063	16.2	4.84	77.4	46.8	1.378	22.1	277.3	511.2	11.9	0.255	0	0.68	0.593	0.267	3.846	17	8.505	8.505	23	0.247	0.536	3.216	0.337	210	B	140	148
	Pork chop, breaded or floured, fried, NS as to fat eaten	1 small or thin cut (3 oz, with bone, raw) (yield after cooking, bone removed) (52g)	1	52	Day 3	Dinner	164.8	11.1	7.15	0.468	0.65	9.911	2.959	47.3	28.6	0.842	13.5	169.5	312.5	7.28	0.156	0	0.416	0.362	0.163	2.351	10.4	5.2	5.2	14	0.151	0.328	1.966	0.206	210	B	140	148
	Turkey bacon, cooked / Bacon, dinde, cuit	1 ounce (28.35g)	2	56.7	Day 2	Breakfast - 10:00am	216.6	16.8	1.758	0	0	15.8	4.703	55.6	5.103	1.196	16.4	224	1296	0	0	0.23	0.584	0.034	0.136	2.002	5.103	0	5.103	5.103	0.181	0.204	3.435	0.211	211	B	140	148
	Turkey bacon, cooked / Bacon, dinde, cuit	1 ounce (28.35g)	2	56.7	Day 3	Breakfast - 6:00am	216.6	16.8	1.758	0	0	15.8	4.703	55.6	5.103	1.196	16.4	224	1296	0	0	0.23	0.584	0.034	0.136	2.002	5.103	0	5.103	5.103	0.181	0.204	3.435	0.211	211	B	140	148
	Beef stew with potatoes and vegetables (including carrots, broccoli, and/or dark-green leafy), tomato-based sauce	grams	241	241	Day 2	Lunch - 1:30pm	212.1	13.3	18.6	3.615	2.868	9.303	3.487	33.7	33.7	1.952	36.2	515.7	756.7	195.2	13	0	0.482	0.159	0.157	3.386	28.9	2.41	28.9	31.3	0.352	0.868	0.721	0.149	210	A	140	148
	Beef stew with potatoes and vegetables (including carrots, broccoli, and/or dark-green leafy), tomato-based sauce	grams	194	194	Day 1	Dinner - 6:00pm	170.7	10.7	15	2.91	2.309	7.488	2.807	27.2	27.2	1.571	29.1	415.2	609.2	157.1	10.5	0	0.388	0.128	0.126	2.726	23.3	1.94	23.3	25.2	0.283	0.698	0.58	0.12	210	A	140	148
	Turkey, light meat, breaded, baked or fried, NS as to skin eaten	ounces	2.3	65.2	Day 3	Dinner	144.8	17.4	4.173	0.196	0.456	5.94	1.636	45	17.6	1.037	17.6	181.3	124.5	0	0	0	0.104	0.066	0.1	4.019	13	4.564	8.477	15.6	0.285	0.209	1.225	0.077	211	B	140	148
	Chicken or turkey, rice, and vegetables (including carrots, broccoli, and/or dark-green leafy), cream sauce, white sauce, or mushroom soup-based sauce (mixture)	grams	238	238	Day 1	Lunch - 11:40am	311.8	19	26.9	2.618	1.785	14.2	3.927	59.5	61.9	2.761	38.1	364.1	597.4	61.9	30.9	0	1.333	0.207	0.183	6.721	85.7	40.5	45.2	114.2	0.305	0.167	2.808	0.19	211	A	140	148
	Pork chop, breaded or floured, fried, NS as to fat eaten	ounces	3.13	88.74	Day 1	Lunch - 11:30am	281.3	18.9	12.2	0.799	1.109	16.9	5.05	80.7	48.8	1.438	23.1	289.3	533.3	12.4	0.266	0	0.71	0.618	0.279	4.013	17.7	8.874	8.874	24	0.258	0.559	3.355	0.351	210	B	140	148
	Pork chop, breaded or floured, fried, NS as to fat eaten	ounces	2.77	78.53	Day 2	Lunch - 12:20pm	248.9	16.7	10.8	0.707	0.982	15	4.469	71.5	43.2	1.272	20.4	256	472	11	0.236	0	0.628	0.547	0.247	3.551	15.7	7.853	7.853	21.2	0.229	0.495	2.969	0.311	210	B	140	148
	Pork with vegetable (excluding carrots, broccoli and/or dark-green leafy) soup, Oriental Style	1 cup (228g)	2	456	Day 3	Dinner	155	22	2.554	0.912	1.459	5.928	2.029	59.3	31.9	1.14	27.4	638.4	191.5	0	2.28	0	0.684	0.588	0.274	4.793	4.56	0	4.56	4.56	0.429	0.502	0.556	0.027	210	B	140	148
	Don Miguel - Costco-chipotle Chicken Mini Tacos	4 mini tacos (79g)	0.5	39.5	Day 2	Lunch - 1:30pm	95	5	9.5	1.5	0.5	4	1	12.5	10	0.54	9.48	85.72	175	10	0.6	0	0.083	0.063	0.04	2.04	5.93	0	5.93	5.93	0.043	0.047	0.547	0.062	211	A	140	148
	Mexican style beef stew, no potatoes, with chili peppers, tomato-based sauce (mixture) (Carne guisada con chile)	1 cup (244g)	1	244	Day 3	Dinner - 6:00pm	385.5	46.1	20.7	3.172	9.54	13.2	4.477	104.9	68.3	6.1	85.4	1254	1325	73.2	241.3	0	2.294	0.239	0.486	10.9	56.1	4.88	51.2	58.6	0.847	3.05	1.449	0.076	210	B	140	148
	Chicken or turkey salad	grams	220	220	Day 3	Lunch - 1:00pm	503.8	35.6	2.816	0.88	1.408	38.5	6.842	121	41.8	1.694	33	376.2	347.6	61.6	1.76	0	2.464	0.086	0.26	7.984	28.6	0	28.6	28.6	0.59	0.396	15.8	1.846	211	A	140	148
	Pinty's - Chicken Nuggets (Gluten Free)	grams	149	149	Day 2	Dinner - 7:45pm	372.5	14.9	34.3	1.49	1.49	19.4	4.47	52.2	0	0.536	35.76	373.99	908.9	0	1.788	0	1.69	0.137	0.303	8.19	0	0	0	0	0.221	0.492	8.92	0.624	211	A	140	148
	Pinty's - Chicken Nuggets (Gluten Free)	grams	125	125	Day 1	Dinner - 7:30pm	312.5	12.5	28.8	1.25	1.25	16.2	3.75	43.8	0	0.45	30	313.75	762.5	0	1.5	0	1.4	0.115	0.255	7.48	0	0	0	0	0.185	0.413	7.48	0.524	211	A	140	148
	Chicken nuggets	1 nugget (16g)	9	144	Day 3	Dinner	427.7	22.4	23.5	1.296	1.267	27.1	5.792	79.2	20.2	1.195	36	375.8	826.6	7.2	0.864	0	1.613	0.132	0.294	8.618	15.8	7.2	8.64	21.6	0.213	0.475	7.186	0.353	211	A	140	148
	PINTY - Buffalo chicken flings	grams	76	76	Day 3	Snack 1 - 1:00pm	121.6	12.2	6.08	0	0	6.08	1.14	34.2	0	0.274	18.24	190.733	433.2	0	0	0	0.8512	0	0.154747	4.54901	4.56	3.8	4.56	10.64	0.112627	0.250892	4.54169	0.320482	211	A	140	148
	PINTY - Buffalo chicken flings	grams	40	40	Day 1	Snack 1 - 3:00pm	64	6.4	3.2	0	0	3.2	0.6	18	0	0.144	9.6	100.386	228	0	0	0	0.448	0	0.0814458	2.39422	2.4	2	2.4	5.6	0.0592771	0.132048	2.39036	0.168675	211	A	140	148
	PINTY - Buffalo chicken flings	grams	39	39	Day 1	Dinner - 5:00pm	62.4	6.24	3.12	0	0	3.12	0.585	17.6	0	0.14	9.36	97.8759	222.3	0	0	0	0.4368	0	0.0794096	2.33436	2.34	1.95	2.34	5.46	0.0577952	0.128747	2.3306	0.164458	211	A	140	148
	Chicken curry	grams	268	268	Day 3	Dinner - 6:30pm	327	30.8	10.7	2.412	5.521	18.2	3.706	93.8	45.6	2.519	56.3	667.3	1348	168.8	13.9	0	3.136	0.121	0.265	11.5	24.1	0	24.1	24.1	0.528	0.348	4.591	0.381	211	A	140	148
	Brewsters - Blackened Steak Salad	1 serving (100g)	1	100	Day 3	Dinner - 7:30pm	461.504	39.823	15.9292	2.65487	2.65487	25.6637	5.75221	86.2832	8.5	1.67	12.5	223.5	458.407	47.5	2.7	0.05	0.64	0.058	0.1735	3.396	13.5	0	13.5	13.5	0.13	1.22	1.04	0.135	220	A	140	148
	Pad Thai with chicken	grams	133	133	Day 3	Lunch - 12:46pm	238.1	12	25.7	1.33	3.431	9.908	2.068	42.6	25.3	1.131	31.9	194.2	375.1	37.2	3.325	0	1.41	0.069	0.09	4.614	22.6	0	22.6	22.6	0.263	0.16	3.141	0.29	211	A	140	148
	Pad Thai with seafood - shrimp	grams	329	329	Day 2	Dinner - 5:41pm	516.5	24.4	66.3	2.303	10.7	17.5	3.274	306	181	4.178	102	401.4	2468	55.9	41.8	0	3.52	0.135	0.214	2.767	62.5	0	62.5	62.5	0.378	0.987	4.616	0.03	212	C	140	148
	Shepherd's pie with beef	1 cup (243g)	3	729	Day 2	Dinner - 4:45pm	794.6	46.4	103.2	10.2	9.769	23	6.145	72.9	109.4	5.613	131.2	2151	1764	175	49.6	0	2.916	0.569	0.408	12.8	65.6	0	65.6	65.6	1.764	1.822	4.352	0.437	210	A	140	148
	Beef shish kabob with vegetables, excluding potatoes	1 cup (154g)	0.5	77	Day 1	Dinner - 7:00pm	78.5	11.9	3.072	0.77	1.725	1.902	0.641	23.9	10	1.093	13.9	211.8	213.3	14.6	9.779	0	0.37	0.047	0.076	2.294	10	0	10	10	0.21	0.631	0.092	0.008	210	A	140	148
	Beef shish kabob with vegetables, excluding potatoes	1 cup (154g)	0.5	77	Day 3	Dinner - 7:00pm	78.5	11.9	3.072	0.77	1.725	1.902	0.641	23.9	10	1.093	13.9	211.8	213.3	14.6	9.779	0	0.37	0.047	0.076	2.294	10	0	10	10	0.21	0.631	0.092	0.008	210	A	140	148
	Beef shish kabob with vegetables, excluding potatoes	1 cup (154g)	0.25	38.5	Day 2	Dinner - 6:00pm	39.3	5.952	1.536	0.385	0.862	0.951	0.321	11.9	5.005	0.547	6.93	105.9	106.6	7.315	4.889	0	0.185	0.023	0.038	1.147	5.005	0	5.005	5.005	0.105	0.316	0.046	0.004	210	A	140	148
	Fit Kitchen - Shredded Hash	1 serving (207g)	1	207	Day 3	Lunch - 2:00pm	315	19.5	15	2.501	2.999	20	9	260	39.4967	1.69115	52.672	457.167	365	62.1	5.64408	0.789697	0.657103	0.173788	0.219297	6.67516	90.048	0	90.048	90.048	0.216394	0.728779	1.55091	0.166272	211	B	140	148
	Kirkland - Smoked Pulled Pork	grams	220	220	Day 3	Dinner - 7:30pm	582.1	54.3	41.8	2.64	33.44	42.7	15.5	155.2	96.8	2.794	48.4	671	1203	28.6	0.44	0.44	1.958	0.3652	0.2816	6.666	4.4	0	4.4	4.4	0.5456	0.902	1.3706	0.0682	210	B	140	148
	IKEA Kycklingköttbullar - Chicken Meatballs	7 meatballs (100g)	1	100	Day 1	Dinner - 7:00pm	190	14	5	0.5	1	12	1.75	65	20	1.08	21.9767	216.977	456.977	31.9767	1.2	0	0.290116	0.101744	0.211047	6.16279	20	9.01163	10.9884	25.9884	0.318023	0.309884	1.06977	0.0662791	211	A	140	148
	Edo Japan - Sukiyaki Beef	1 serving (420g)	1	420	Day 1	Dinner - 6:00pm	580	32	80	2.999	3.998	15	6.002	59.1111	93.0222	4.14089	59.1111	870.8	760.667	921.511	68.1333	0	3.84533	0.202222	0.404444	7.07467	135.333	0	135.333	135.333	0.684444	2.36756	6.40267	0.942667	210	A	140	148
	Shepherd's pie with beef	1 cup (243g)	2	486	Day 2	Dinner - 6:30pm	529.7	30.9	68.8	6.804	6.512	15.3	4.097	48.6	72.9	3.742	87.5	1434	1176	116.6	33	0	1.944	0.379	0.272	8.539	43.7	0	43.7	43.7	1.176	1.215	2.901	0.292	210	A	140	148
	Shepherd's pie with beef	1 cup (243g)	2	486	Day 3	Dinner - 7:30pm	529.7	30.9	68.8	6.804	6.512	15.3	4.097	48.6	72.9	3.742	87.5	1434	1176	116.6	33	0	1.944	0.379	0.272	8.539	43.7	0	43.7	43.7	1.176	1.215	2.901	0.292	210	A	140	148
	Meatballs, NS as to type of meat, with sauce (mixture)	ounces	3	85.05	Day 3	Lunch - 2:00pm	155.6	15.4	0.111	0	0.102	10	3.79	84.2	17.9	1.548	12.8	182	669.3	11.9	0	0	0.332	0.031	0.136	2.867	8.505	0	8.505	8.505	0.216	1.59	0.305	0.034	210	A	140	148
	Pad Thai with chicken	grams	133	133	Day 3	Lunch - 12:46pm	238.1	12	25.7	1.33	3.431	9.908	2.068	42.6	25.3	1.131	31.9	194.2	375.1	37.2	3.325	0	1.41	0.069	0.09	4.614	22.6	0	22.6	22.6	0.263	0.16	3.141	0.29	211	A	140	148
	Pad Thai with seafood - shrimp	grams	507	507	Day 2	Dinner - 7:18pm	796	37.7	102.2	3.549	16.4	26.9	5.045	471.5	278.8	6.439	157.2	618.5	3803	86.2	64.4	0	5.425	0.208	0.33	4.264	96.3	0	96.3	96.3	0.583	1.521	7.113	0.046	212	C	140	148
	Chicken or turkey shish kabob with vegetables, excluding potatoes	1 shishkabob (202g)	2	404	Day 3	Dinner - 6:30pm	311.1	45.7	16.1	4.04	9.05	6.706	1.689	141.4	64.6	2.424	68.7	993.8	1168	101	51.3	0	1.616	0.218	0.319	14.5	40.4	0	40.4	40.4	0.994	0.485	1.285	0.053	211	A	140	148
	Costco - Beef Stir Fry	1 oz (28g)	7.46	208.88	Day 1	Dinner - 6:45pm	358.1	44.8	9.33535	3.14003	2.42821	14.9	7.459	82.1	46.0681	4.029	29.2741	431.253	119.4	456.367	33.7422	0	1.90436	0.100148	0.200296	3.50364	67.0222	0	67.0222	67.0222	0.338963	1.1725	3.17084	0.466844	210	A	140	148
	Costco - Beef Stir Fry	1 oz (28g)	7	196	Day 3	Lunch - 12:30pm	336	42	8.79677	2.95887	2.28812	14	6.999	77	43.4104	3.781	27.5852	406.373	112	430.039	31.7956	0	1.79449	0.0943704	0.188741	3.30151	63.1556	0	63.1556	63.1556	0.319407	1.10486	2.98791	0.439911	210	A	140	148
	Snacks, beef jerky, chopped and formed / Grignotises, jerky de boeuf, haché et formé	grams	26	26	Day 1	Lunch - 12:30pm	105.8	8.632	2.87	0.468	2.34	6.656	2.821	12.5	5.2	1.409	13.3	155.2	575.4	0	0	0.405	0.127	0.04	0.037	0.45	34.8	0	34.8	34.8	0.047	0.257	0.211	0.048	210	A	140	148
	Kirkland - Smoked Pulled Pork	2 oz (56.69g)	2	113.38	Day 1	Dinner - 6:30pm	300	28	21.47	1.356	17.176	22	8	80	49.72	1.44	24.86	344.65	620	14.69	0.226	0.226	1.0057	0.18758	0.14464	3.4239	2.26	0	2.26	2.26	0.28024	0.4633	0.70399	0.03503	210	B	140	148
	Roll with meat and/or shrimp, vegetables and rice paper (not fried)	1 roll (4-1/4" x 1-1/2" dia) (71g)	1	71	Day 2	Lunch - 1:15pm	81.6	6.255	9.62	1.704	1.434	1.903	0.684	14.9	15.6	0.447	11.4	174.7	49	139.9	8.165	0	0.256	0.155	0.071	1.274	10.6	0	10.6	10.6	0.146	0.106	0.165	0.011	212	C	140	148
	Roll with meat and/or shrimp, vegetables and rice paper (not fried)	1 cup (83g)	3	249	Day 3	Dinner - 5:30pm	286.4	21.9	33.7	5.976	5.03	6.673	2.398	52.3	54.8	1.569	39.8	612.5	171.8	490.5	28.6	0	0.896	0.545	0.249	4.47	37.4	0	37.4	37.4	0.513	0.374	0.58	0.04	212	C	140	148
	Chop suey, with meat, canned / Chop suey, avec viande, conserve	100 grams (100g)	1	100	Day 3	Dinner - 7:00pm	60	4.074	5.293	1.149	3.396	2.799	0.364	6.005	16.7	0.594	12.6	163.6	489.8	5.229	4.464	1.165	0.45	0.041	0.069	1.478	24.4	0.479	23.9	24.7	0.086	0.058	0.541	0.193	211	A	140	148
	Chop suey, with meat, canned / Chop suey, avec viande, conserve	100 grams (100g)	0.75	75	Day 1	Dinner - 7:00pm	45	3.056	3.97	0.862	2.547	2.099	0.273	4.504	12.5	0.446	9.426	122.7	367.3	3.922	3.348	0.874	0.337	0.031	0.051	1.109	18.3	0.359	17.9	18.5	0.065	0.044	0.406	0.145	211	A	140	148
	Chop suey, with meat, canned / Chop suey, avec viande, conserve	100 grams (100g)	0.75	75	Day 2	Dinner - 6:00pm	45	3.056	3.97	0.862	2.547	2.099	0.273	4.504	12.5	0.446	9.426	122.7	367.3	3.922	3.348	0.874	0.337	0.031	0.051	1.109	18.3	0.359	17.9	18.5	0.065	0.044	0.406	0.145	211	A	140	148
	Pizza 73 - Gluten free Hawaiian Pizza	1 slice (95g)	3	285	Day 3	Dinner - 6:30pm	570	24	72	3.001	12	21	11.4	60	450	1.08	71.25	635.55	1560	60	30	0	3.68	0.641	0.485	9.434	102.6	0	102.6	102.6	0.27	2.166	9.05	0.9092	219	A	140	149
	Pizza, meat and vegetable, regular crust, frozen	1 package 24.2 oz pizza (713g)	1	713	Day 3	Dinner - 9:30pm	1968	80.4	179.2	15.7	34.6	102.9	36.2	114.1	1084	9.697	178.2	1490	3957	463.4	24.2	0	8.057	1.54	1.661	17	242.4	242.4	0	406.4	1.062	4.421	16.3	1.569	219	A	140	149
	Pizza, cheese, thick crust	1 piece (1/8 of 14" dia) (129g)	2	258	Day 2	Lunch - 1:30pm	696.6	31.1	81.7	4.386	9.185	27.2	11.6	56.8	474.7	5.65	61.9	415.4	1388	185.8	1.032	0	2.064	0.854	0.673	8.228	237.4	154.8	82.6	345.7	0.168	1.522	4.53	0.611	219	A	140	149
	Roasted Mediterranean Pizza - Judy G Gluten Free	1/4 Pizza (118g)	2	236	Day 1	Lunch - 12:45pm	340	6	66	5.999	5.999	9.001	1.001	0	40	3.599	56.64	469.64	600	40	30	0.236	3.044	0.483	0.3776	6.1124	94.4	94.4	94.4	94.4	0.1534	1.345	6.22	0.831	219	A	140	149
	Roasted Mediterranean Pizza - Judy G Gluten Free	1/4 Pizza (118g)	2	236	Day 2	Lunch - 12:30pm	340	6	66	5.999	5.999	9.001	1.001	0	40	3.599	56.64	469.64	600	40	30	0.236	3.044	0.483	0.3776	6.1124	94.4	0	94.4	94.4	0.1534	1.345	6.22	0.831	219	A	140	149
	Famoso - Gluten Free Pepperoni Pizza	1 slice (113.4g)	2	226.8	Day 2	Lunch - 12:45pm	367.6	16.2	47.4	2.2	2.801	12.2	5.001	33.2	144	4.715	57	503.98	959.2	159.6	8.521	0	2.92	0.508	0.384	7.458	0	0	0	0	0.215	0.72	7.18	0.145	219	A	140	149
	Roasted Mediterranean Pizza - Judy G Gluten Free	1/4 Pizza (118g)	1	118	Day 3	Lunch - 12:30pm	170	3	33	3	3	4.501	0.5	0	20	1.799	28.32	234.82	300	20	15	0.118	1.522	0.242	0.189	3.056	47.02	0	47.02	47.02	0.0767	0.673	3.11	0.415	219	A	140	149
	Roasted Mediterranean Pizza - Judy G Gluten Free	grams	122	122	Day 2	Lunch - 12:00pm	175.8	3	34.1	3.101	3.101	4.653	0.517	0	20.7	1.86	29.28	242.78	310.2	20.68	15.5	0.122	1.574	0.2501	0.1952	3.1598	48.8	0	48.8	48.8	0.0793	0.695	3.212	0.4294	219	A	140	149
	Roasted Mediterranean Pizza - Judy G Gluten Free	grams	128	128	Day 1	Dinner - 7:20pm	184.4	3.25	35.8	3.254	3.254	4.882	0.543	0	21.7	1.952	30.72	254.72	325.4	21.69	16.3	0.128	1.65	0.262	0.205	3.315	51.2	0	51.2	51.2	0.0832	0.7296	3.374	0.451	219	A	140	149
	Roast beef sandwich	1 sandwich (136g)	1	136	Day 2	Lunch	337.3	27.1	26	1.224	2.217	13	4.867	68	84.3	4.298	32.6	352.2	602.5	0	0	0	0.231	0.31	0.355	5.996	65.3	44.9	20.4	95.2	0.262	2.19	0.895	0.097	219	B	140	149
	Tuna salad sandwich, with lettuce	1 sandwich (167g)	1	167	Day 3	Lunch	288.9	19.1	36.6	1.837	8.383	7.198	1.244	21.7	93.5	3.056	31.7	242.2	784.9	26.7	1.336	0.501	0.735	0.267	0.232	10	68.5	45.1	23.4	100.2	0.272	1.753	3.003	0.382	219	B	140	149
	Pizza with meat, thin crust - sausage	grams	315	315	Day 1	Lunch - 1:30pm	929.2	40.8	84.4	4.725	6.552	47	18.3	85	623.7	7.119	72.5	702.4	2281	113.4	12.3	0	3.15	0.844	0.876	8.483	151.2	100.8	50.4	220.5	0.343	1.512	7.031	0.753	219	A	140	149
	Pizza with meat, thin crust - sausage	grams	98	98	Day 2	Dinner	289.1	12.7	26.2	1.47	2.038	14.6	5.692	26.5	194	2.215	22.5	218.5	709.5	35.3	3.822	0	0.98	0.263	0.272	2.639	47	31.4	15.7	68.6	0.107	0.47	2.187	0.234	219	A	140	149
	Earls - Chicken, Brie + Fig Sandwich	1 serving (364g)	1	364	Day 3	Dinner - 6:30pm	750	44	70	5.999	18	33	11	130	100	6.301	69.16	706.16	1310	0	4.801	0.728	0.728	0.655	0.473	13.61	58.24	0	58.24	58.24	0.4004	0.76	14.56	1.92	219	B	140	149
	A&W - Mozza Burger (lettuce-wrapped)	1 serving (188g)	1	188	Day 3	Dinner - 8:00pm	460	22	6.999	0	5.001	36	12.5	80	150	1.799	35.72	379.76	570	22.56	4.8	0.18	0.11	0.48	0.43	6.13	78.96	41.36	9.4	78.96	0.28	3.61	3.42	0.74	219	D	140	149
	Gluten Free Vegetarian Pizza	1 slice (95g)	3	285	Day 2	Dinner - 8:00pm	510	18	66	3.001	5.999	21	10.5	45	30	1.08	65.55	524.4	1200	173.85	27	0	2.202	0.64	0.666	7.936	66.56	0	66.56	66.56	0.23	1.74	3.89	0.384	219	A	140	149
	Wiener (frankfurter), hot dog type, fat free / Saucisse fumée, type hot dog (chien chaud), sans gras	1 wiener / 1 saucisse hot dog (50g)	1	50	Day 2	Lunch	36.5	6.3	2.15	0	1.05	0.3	0.1	14.5	7.5	0.46	10.5	235.5	487	0	0	0	0	0.12	0.14	1.85	15	0	15	15	0.025	0.26	0.05	0.005	219	F	140	149
	Amy's - Cheese Pizza - Rice Crust - Gluten Free	1/3 pizza (121g)	1	121	Day 1	Lunch - 1:00pm	320	9.999	34	2	5	16	4	9.999	150	8.4	32	247.179	590	20	3.6	0.124211	1.60211	0.254211	0.198737	3.21705	49.6842	49.6842	49.6842	49.6842	0.0807368	0.707895	3.27368	0.437368	219	A	140	149
	Pizza with meat and vegetables, NS as to type of crust	grams	129	129	Day 3	Dinner - 7:10pm	331.5	13.3	35	2.193	2.851	15.3	5.55	24.5	188.3	2.812	25.8	265.7	766.3	34.8	11.5	0	1.135	0.332	0.328	3.292	61.9	41.3	21.9	91.6	0.144	0.439	2.516	0.258	219	A	140	149
	Pizza, cheese, with vegetables, thin crust	grams	129	129	Day 3	Dinner - 7:10pm	274.8	11.7	32.5	2.322	3.367	11	4.373	15.5	229.6	2.567	25.8	270.9	683.7	43.9	14.3	0	1.238	0.27	0.304	2.612	56.8	36.1	20.6	82.6	0.135	0.322	2.081	0.236	219	A	140	149
	Sausage, Frankfurter (weiner) (Beef)	grams	28	28	Day 3	Dinner - 7:00pm	88.2	3.273	0.832	0	0.328	7.868	3.209	16.2	3.92	0.314	3.08	101.9	242.2	0.84	0	0.252	0.14	0.009	0.042	0.621	0	0	0	0	0.036	0.269	0.259	0.023	219	F	140	149
	Judy g - Gluten Free Pepperoni and Cheese Pizza	grams	150	150	Day 2	Dinner - 7:30pm	337.8	13.5	44.6	2.703	2.703	13.5	5.406	33.8	202.7	2.433	37.8319	334.5	540.5	105.929	8.108	0	1.93805	0.337168	0.254867	4.95	0	0	0	0	0.142699	0.477876	4.76549	0.0962389	219	A	140	149
	Sabtasso's Deep Dish - Cheese Pizza	grams	250	250	Day 1	Dinner - 6:30pm	577.3	24.1	72.2	3.208	20.8	22.4	11.2	32.1	320.7	4.33	59.9806	368.8	1155	180.039	1	0	2	0.827519	0.652132	7.97287	230.039	150	80.0388	334.981	0.162791	1.47481	4.38953	0.592054	219	A	140	149
	Boston Pizza Gluten Wise - Rustic Italian	8' individual pizza (496g)	1	496	Day 1	Dinner - 4:30pm	820	38	96	5	14	32	16	80	400	9.002	119.04	987.04	987.04	300	42	0	6.39756	1.01722	0.794441	12.8456	197.643	0	197.643	197.643	0.3224	2.82888	13.0725	1.74441	219	A	140	149
	Sausage, Frankfurter (weiner) (Beef)	1 frankfurter (50g)	1	50	Day 3	Dinner - 10:00pm	157.5	5.845	1.485	0	0.585	14	5.73	29	7	0.56	5.5	182	432.5	1.5	0	0.01125	0.25	0.016	0.076	1.109	0	0	0	0	0.064	0.48	0.463	0.041	219	F	140	149
	Gluten Free Vegetarian Pizza	1 slice (95g)	2	190	Day 1	Dinner - 7:30pm	340	12	44	2.001	4	14	7	30	20	0.72	43.7	349.6	800	115.9	18	0	1.468	0.426667	0.444	5.29067	44.3733	0	44.3733	44.3733	0.153333	1.16	2.59333	0.256	219	A	140	149
	Gluten Free Vegetarian Pizza	grams	155	155	Day 1	Lunch - 2:15pm	277.4	9.79	35.9	1.632	3.263	11.4	5.71	24.5	16.3	0.587	35.65	285.2	652.6	94.55	14.7	0	1.19758	0.34807	0.362211	4.31607	36.1993	0	36.1993	36.1993	0.125088	0.946316	2.11561	0.208842	219	A	140	149
	Pizza with meat and vegetables, NS as to type of crust	grams	129	129	Day 3	Dinner - 7:10pm	331.5	13.3	35	2.193	2.851	15.3	5.55	24.5	188.3	2.812	25.8	265.7	766.3	34.8	11.5	0	1.135	0.332	0.328	3.292	61.9	0	61.9	61.9	0.144	0.439	2.516	0.258	219	A	140	149
	Pizza, cheese, with vegetables, thin crust	grams	129	129	Day 3	Dinner - 7:10pm	274.8	11.7	32.5	2.322	3.367	11	4.373	15.5	229.6	2.567	25.8	270.9	683.7	43.9	14.3	0	1.238	0.27	0.304	2.612	56.8	0	56.8	56.8	0.135	0.322	2.081	0.236	219	A	140	149
	Maple Leaf - Natural Selections Weiners	1 weiner (38g)	2	76	Day 1	Lunch - 12:45pm	220	10	3.268	0	1.596	18	8	50	11.4	0.72	15.96	357.96	640	0	0	0	0	0.1824	0.2128	2.812	22.8	0	22.8	22.8	0.038	0.3952	0.076	0.0076	219	F	140	149
	Pizza with meat and fruit, thick crust - ham and pineapple	grams	85	85	Day 1	Lunch - 2:50pm	208.2	8.211	27.9	1.445	3.077	7.072	2.471	11	105.4	1.862	17.8	153.8	482.8	18.7	9.01	0	0.672	0.293	0.219	2.377	47.6	0	47.6	47.6	0.094	0.204	1.574	0.167	219	A	140	149
	Boston Pizza - GlutenWise Pizza	Individual size (278g)	1	278	Day 3	Dinner - 4:30pm	720	26	89	11	14	29	11	100	400	3.6	66.72	553.22	1420	168.145	8.999	0	3.58573	0.570136	0.445271	7.19973	110.776	0	110.776	110.776	0.1807	1.58554	7.32695	0.977712	219	A	140	149
	Bacon and beef sticks / Bâtonnets de viande, bacon et boeuf	1 food guide serving = 75g / 1 portion guide alimentaire = 75g (75g)	0.25	18.75	Day 2	Dinner - 7:00pm	97.1	5.456	0.15	0	0.15	8.288	3	19.1	2.625	0.349	3.188	72.2	266.2	0	0	0	0	0.113	0.053	0.913	0.375	0	0.375	0.375	0.094	0.356	0.538	0.062	219	F	140	149
	Fast foods, sandwiches and burgers, cheeseburger, large, single patty, with bacon and condiments / Aliments prêts à manger, sandwichs et burgers, hambourgeois au fromage, gros, 1 galette, avec bacon et condiments	1 ounce (28.35g)	1	28.35	Day 3	Dinner - 5:30pm	79.9	4.474	5.355	0.369	1.313	4.496	1.737	14.2	38.8	0.587	6.52	67.5	191.1	1.517	0.198	0.0403	0	0.049	0.099	1.2	13.9	0	13.9	13.9	0.069	0.354	0	0	219	D	140	149
	Coco Brooks -GF Palazzo Pizza	1 pizza (85g)	1	85	Day 2	Lunch - 12:00PM	220	9	21	2	2	10	4	40	100	0.72	19.5153	189.515	440	5.1	1.2	0	0.85	0.228112	0.235918	2.28893	40.7653	27.2347	13.6173	59.5	0.0928061	0.407653	1.89689	0.202959	219	A	140	149
	Janet & Greta - Chicken Burger with Fire-Roasted Vegetables	1 burger (113g)	1	113	Day 1	Dinner - 7:30PM	180	21	2	0	2	10	3	85	20	1.8	25.99	222.61	425	0.2	2.4	0.113	0.4294	0.26442	0.13673	12.3837	14.69	0	14.69	14.69	0.34917	0.2486	1.79105	0.20905	219	E	140	149
	Judy g - Gluten Free Pepperoni and Cheese Pizza	1/4 pizza (111g)	1	111	Day 1	Lunch - 3:00PM	250	10	33	2	2	10	4	25	150	1.8	27.9956	247.53	400	78.3876	6	0	1.43416	0.249504	0.188602	3.663	0	0	0	0	0.105597	0.353628	3.52646	0.0712168	219	A	140	149
	Almonds, unroasted	1 almond (1.2g)	12	14.4	Day 2	Lunch - 2:00pm	82.8	3.056	3.12	1.757	0.56	7.116	0.537	0	38	0.536	38.6	101.5	0.144	0	0	0	3.776	0.03	0.146	0.487	7.2	0	7.2	7.2	0.021	0	1.737	0.001	33	A	160	161
	Peanuts, All Types, dry roasted w/o salt	grams	12	12	Day 1	Breakfast - 1:00pm	70.4	2.922	2.551	1.008	0.588	5.959	0.927	0	6.96	0.19	21.4	76.1	0.72	0	0	0	0.592	0.018	0.024	1.723	11.6	0	11.6	11.6	0.056	0	1.166	0.003	33	A	160	161
	Nuts, almonds, oil roasted, unblanched / Noix, amandes, rôties dans l'huile, non blanchies	grams	44	44	Day 2	Lunch - 11:30am	267.5	9.341	7.779	4.62	2.002	24.3	1.852	0	128	1.619	120.6	307.6	0.44	0	0	0	11.4	0.04	0.344	1.613	11.9	0	11.9	11.9	0.052	0	5.948	0.174	33	A	160	161
	Nuts, almonds, oil roasted, unblanched / Noix, amandes, rôties dans l'huile, non blanchies	grams	42	42	Day 3	Lunch - 11:30am	255.4	8.917	7.426	4.41	1.911	23.2	1.767	0	122.2	1.546	115.1	293.6	0.42	0	0	0	10.9	0.039	0.328	1.539	11.3	0	11.3	11.3	0.05	0	5.678	0.166	33	A	160	161
	Nuts, almonds, oil roasted, unblanched / Noix, amandes, rôties dans l'huile, non blanchies	25 almonds / 25 amandes (32.22g)	0.36	11.6	Day 2	Dinner - 7:00pm	70.5	2.462	2.05	1.218	0.528	6.398	0.488	0	33.7	0.427	31.8	81.1	0.116	0	0	0	3.012	0.011	0.091	0.425	3.131	0	3.131	3.131	0.014	0	1.568	0.046	33	A	160	161
	Peanut Butter, chunky w/o salt	1 cup (258g)	0.25	64.5	Day 2	Breakfast - 11:00am	379.9	15.5	13.9	5.16	5.424	32.2	4.907	0	29	1.226	103.2	480.5	11	0	0	0	4.064	0.068	0.072	8.834	59.3	0	59.3	59.3	0.27	0	8.936	0.05	33	C	160	161
	Nuts, almonds, dry roasted, unblanched, salted / Noix, amandes, rôties à sec, non blanchies, salées	100ml whole / 100ml entier (58.33g)	0.75	43.74	Day 1	Dinner - 6:00pm	261.6	9.663	8.438	5.162	2.143	23.1	1.77	0	116.4	1.973	125.1	326.3	148.3	0	0	0	11.4	0.032	0.376	1.684	14.4	0	14.4	14.4	0.055	0	5.533	0.003	33	A	160	161
	Nuts, almonds, dry roasted, unblanched, salted / Noix, amandes, rôties à sec, non blanchies, salées	100ml whole / 100ml entier (58.33g)	0.75	43.74	Day 2	Lunch - 1:00pm	261.6	9.663	8.438	5.162	2.143	23.1	1.77	0	116.4	1.973	125.1	326.3	148.3	0	0	0	11.4	0.032	0.376	1.684	14.4	0	14.4	14.4	0.055	0	5.533	0.003	33	A	160	161
	Nuts, pecans, dried / Noix, pacanes, séchées	grams	25	25	Day 3	Breakfast - 10:00am	172.8	2.292	3.51	2.4	0.992	18	1.545	0	17.5	0.632	30.2	102.5	0	0.75	0.275	0	0.35	0.165	0.032	0.292	5.5	0	5.5	5.5	0.052	0	5.157	0.246	33	A	160	161
	Nuts, pecans, dried / Noix, pacanes, séchées	100ml chopped / 100ml haché (46.07g)	0.15	6.91	Day 1	Breakfast - 8:30am	47.8	0.634	0.97	0.663	0.274	4.973	0.427	0	4.837	0.175	8.362	28.3	0	0.207	0.076	0	0.097	0.046	0.009	0.081	1.52	0	1.52	1.52	0.015	0	1.425	0.068	33	A	160	161
	Nuts, pistachio nuts, dry roasted / Noix, pistaches, rôties à sec	100ml (51.99g)	0.32	16.64	Day 1	Dinner - 6:00pm	95.2	3.552	4.6	1.713	1.299	7.647	0.924	0	18.3	0.699	20	173.3	1.664	2.163	0.383	0	0.321	0.14	0.026	0.237	8.318	0	8.318	8.318	0.212	0	2.268	0.044	33	A	160	161
	Psyllium seed, husks	1 cup, husks (66g)	0.042	2.77	Day 2	Breakfast - 9:30am	5.544	0.128	2.143	2.143	0	0.014	0.002	0	8.15	0	0	0	3.465	0	0	0	0	0	0	0	0	0	0	0	0	0	0.002	0	33	B	160	161
	Hemp Hearts - Raw shelled hemp seeds - Manitoba Harvest	1 tablespoon (15g)	2	30	Day 1	Breakfast - 8:40am	170	10	3	3	1	13	1.5	0	20	4.2	56	331.5	3	0	0	0	0	0.399	1.164	1.85	33	0	33	33	0.165	0	8.301	2.568	33	B	160	161
	Hemp Hearts - Raw shelled hemp seeds - Manitoba Harvest	1 tablespoon (15g)	2	30	Day 2	Breakfast - 8:30am	170	10	3	3	1	13	1.5	0	20	4.2	56	331.5	3	0	0	0	0	0.399	1.164	1.85	33	0	33	33	0.165	0	8.301	2.568	33	B	160	161
	Nuts, almonds, toasted, unblanched / Noix, amandes, grillées, non blanchies	1 ounce (28.35g)	0.083	2.36	Day 2	Dinner - 7:30pm	13.9	0.481	0.541	0.68	0	1.199	0.114	0	6.683	0.116	7.203	18.3	0.26	0	0.017	0	1.187	0.003	0.014	0.067	1.514	0	1.514	1.514	0.002	0	0.241	0.009	33	A	160	161
	Seeds, pumpkin and squash seed kernels, dried / Graines, citrouille et courge, graines, déshydratées	1 ounce (28.35g)	0.15	4.25	Day 3	Dinner - 5:30pm	23.8	1.286	0.455	0.255	0.06	2.086	0.368	0	1.956	0.375	25.2	34.4	0.298	0.043	0.081	0	0.093	0.012	0.007	0.212	2.466	0	2.466	2.466	0.006	0	0.881	0.005	33	B	160	161
	Peanut butter, chunk type, fat and sugar added / Beurre d'arachides croquant, gras et sucre ajoutés	100ml (109.04g)	0.5	54.52	Day 3	Snack 1 - 5:45pm	321.1	13.1	11.8	4.362	4.585	27.2	4.406	0	24.5	1.036	87.2	406.2	9.269	0	0	0	3.435	0.058	0.061	7.467	50.2	0	50.2	50.2	0.228	0	8.023	0.045	33	C	160	161
	Peanut butter, chunk type, fat and sugar added / Beurre d'arachides croquant, gras et sucre ajoutés	100ml (109.04g)	0.45	49.07	Day 2	Snack 2 - 5:30pm	289	11.8	10.6	3.926	4.127	24.5	3.965	0	22.1	0.932	78.5	365.6	8.342	0	0	0	3.091	0.052	0.054	6.721	45.1	0	45.1	45.1	0.205	0	7.221	0.041	33	C	160	161
	Peanut butter, reduced sodium and reduced sugar	1 tablespoon (16g)	0.5	8	Day 1	Lunch - 4:00pm	50.6	1.92	1.746	0.528	0.743	3.992	0.617	0	3.28	0.152	12.7	59.8	16.2	0	0	0	0.724	0.01	0.009	1.095	7.36	0	7.36	7.36	0.036	0	1.128	0.006	33	C	160	161
	Nuts, almonds, dried, unblanched / Noix, amandes, séchées, non blanchies	grams	15	15	Day 2	Lunch - 12:30pm	86.4	3.183	3.251	1.83	0.584	7.413	0.56	0	39.6	0.558	40.2	105.8	0.15	0	0	0	3.933	0.032	0.152	0.508	7.5	0	7.5	7.5	0.021	0	1.809	0.001	33	A	160	161
	Nuts, cashew nuts, raw / Noix, noix d'acajou (cajous, anacardes), crues	grams	15	15	Day 2	Lunch - 12:30pm	83	2.733	4.905	0.495	0.886	6.578	1.167	0	5.55	1.002	43.8	99	1.8	0	0.075	0	0.135	0.063	0.009	0.159	3.75	0	3.75	3.75	0.063	0	1.167	0.009	33	A	160	161
	Nuts, mixed nuts, oil roasted without peanuts / Noix, noix mélangées, rôties dans l'huile sans arachides	ounces	0.5	14.18	Day 3	Lunch - 12:00pm	87.2	2.2	3.157	0.78	0	7.962	1.288	0	15	0.364	35.6	77.1	1.559	0.142	0.071	0	1.62	0.071	0.069	0.278	7.938	0	7.938	7.938	0.026	0	1.579	0.035	33	A	160	161
	Peanut butter, smooth type, fat and sugar added / Beurre d'arachides crémeux, gras et sucre ajoutés	1 ounce (28.35g)	0.5	14.18	Day 2	Breakfast - 9:30am	83.5	3.557	2.78	0.794	1.307	7.143	1.459	0	6.095	0.265	21.8	92	2.41	0	0	0	1.274	0.01	0.015	1.9	10.5	0	10.5	10.5	0.077	0	1.955	0.011	33	C	160	161
	Nuts, mixed nuts, oil roasted without peanuts / Noix, noix mélangées, rôties dans l'huile sans arachides	1 ounce (28.35g)	1	28.35	Day 1	Lunch - 11:40am	174.4	4.4	6.314	1.559	0	15.9	2.576	0	30.1	0.729	71.2	154.2	3.119	0.284	0.142	0	2.32	0.143	0.138	0.557	15.9	0	15.9	15.9	0.051	0	3.157	0.071	33	A	160	161
	Peanut butter, smooth type, fat and sugar added / Beurre d'arachides crémeux, gras et sucre ajoutés	1 ounce (28.35g)	0.068	1.93	Day 2	Lunch - 11:00am	11.4	0.484	0.378	0.108	0.178	0.971	0.198	0	0.829	0.036	2.969	12.5	0.328	0	0	0	0.173	0.001	0.002	0.258	1.427	0	1.427	1.427	0.01	0	0.266	0.001	33	C	160	161
	Peanut butter, smooth type, fat and sugar added / Beurre d'arachides crémeux, gras et sucre ajoutés	1 ounce (28.35g)	0.068	1.93	Day 3	Dinner	11.4	0.484	0.378	0.108	0.178	0.971	0.198	0	0.829	0.036	2.969	12.5	0.328	0	0	0	0.173	0.001	0.002	0.258	1.427	0	1.427	1.427	0.01	0	0.266	0.001	33	C	160	161
	Seeds, chia seeds, dried / Graines de chia, déshydratées	grams	0.832	0.83	Day 2	Lunch - 11:00am	4.077	0.13	0.365	0.314	0	0.256	0.026	0	5.25	0.064	2.781	1.331	0.158	0.017	0	0	0.00415	0.00515	0	0.0732	0.4067	0	0	0.4067	0.4067	0	0.048	0.146	33	B	160	161
	Seeds, chia seeds, dried / Graines de chia, déshydratées	grams	0.832	0.83	Day 3	Dinner	4.077	0.13	0.365	0.314	0	0.256	0.026	0	5.25	0.064	2.781	1.331	0.158	0.017	0	0	0.00415	0.00515	0	0.0732	0.4067	0	0	0.4067	0.4067	0	0.048	0.146	33	B	160	161
	Seeds, flaxseeds (linseeds), whole and ground / Graines, lin, entières et moulues	125ml (88.76g)	0.068	6.04	Day 2	Lunch - 11:00am	32.2	1.195	1.743	1.684	0.094	2.511	0.221	0	20.2	0.302	22.1	50.2	1.684	0	0.036	0	0.019	0.099	0.01	0.186	5.251	0	5.251	5.251	0.029	0	0.388	1.396	33	B	160	161
	Seeds, flaxseeds (linseeds), whole and ground / Graines, lin, entières et moulues	125ml (88.76g)	0.068	6.04	Day 3	Dinner	32.2	1.195	1.743	1.684	0.094	2.511	0.221	0	20.2	0.302	22.1	50.2	1.684	0	0.036	0	0.019	0.099	0.01	0.186	5.251	0	5.251	5.251	0.029	0	0.388	1.396	33	B	160	161
	Seeds, flaxseeds (linseeds), whole and ground / Graines, lin, entières et moulues	grams	3	3	Day 3	Breakfast - 5:30am	16	0.594	0.866	0.837	0.046	1.248	0.11	0	10	0.15	11	24.9	0.837	0	0.018	0	0.01	0.049	0.005	0.092	2.61	0	2.61	2.61	0.014	0	0.193	0.694	33	B	160	161
	Seeds, flaxseeds (linseeds), whole and ground / Graines, lin, entières et moulues	grams	2	2	Day 2	Breakfast - 5:30am	10.7	0.396	0.578	0.558	0.031	0.832	0.073	0	6.68	0.1	7.33	16.6	0.558	0	0.012	0	0.006	0.033	0.003	0.062	1.74	0	1.74	1.74	0.009	0	0.128	0.463	33	B	160	161
	Nuts, pecans, dried / Noix, pacanes, séchées	100ml chopped / 100ml haché (46.07g)	1	46.07	Day 2	Snack 2 - 4:00pm	318.3	4.225	6.468	4.423	1.829	33.2	2.847	0	32.2	1.166	55.7	188.9	0	1.382	0.507	0	0.645	0.304	0.06	0.538	10.1	0	10.1	10.1	0.097	0	9.503	0.454	33	A	160	161
	Peanut butter, reduced sodium and reduced sugar	1 tablespoon (16g)	1	16	Day 1	Breakfast - 8:30am	101.1	3.84	3.493	1.056	1.486	7.984	1.235	0	6.56	0.304	25.4	119.5	32.5	0	0	0	1.448	0.019	0.018	2.19	14.7	0	14.7	14.7	0.072	0	2.256	0.012	33	C	160	161
	Seeds, chia seeds, dried / Graines de chia, déshydratées	15ml (10.8g)	0.5	5.4	Day 1	Breakfast - 8:30am	26.5	0.844	2.369	2.037	0	1.661	0.172	0	34.1	0.4168	18.09	8.643	1.026	0.108	0	0	0.027	0.0335	0	0.4768	2.646	0	0	0.4768	0.4768	0	0.313	0.948	33	B	160	161
	Hemp Hearts - Raw shelled hemp seeds - Manitoba Harvest	1 tablespoon (15g)	1	15	Day 3	Lunch - 12:00pm	57	5	1	1.5	0	6.5	0.75	0	10	1.674	28	165.75	0.6	0	0	0	0	0.1995	0.582	0.927	16.5	0	16.5	16.5	0.0825	0	4.15	1.284	33	B	160	161
	Hemp Hearts - Raw shelled hemp seeds - Manitoba Harvest	1 tablespoon (15g)	0.5	7.5	Day 1	Breakfast - 7:15	42.5	2.5	0.5	0.75	0	3.25	0.375	0	5	0.837	14	82.88	0.3	0	0	0	0	0.0998	0.291	0.464	8.25	0	8.25	8.25	0.0413	0	2.073	0.642	33	B	160	161
	Nuts, mixed nuts, oil roasted without peanuts / Noix, noix mélangées, rôties dans l'huile sans arachides	1 ounce (28.35g)	1	28.35	Day 1	Lunch - 11:40am	174.4	4.4	6.314	1.559	0	15.9	2.576	0	30.1	0.729	71.2	154.2	3.119	0.284	0.142	0	2.32	0.143	0.138	0.557	15.9	0	15.9	15.9	0.051	0	3.157	0.071	33	A	160	161
	Peanut butter, reduced sodium and reduced sugar	grams	20	20	Day 2	Breakfast - 7:45am	126.4	4.8	4.366	1.32	1.858	9.98	1.543	0	8.2	0.38	31.8	149.4	40.6	0	0	0	1.81	0.024	0.022	2.738	18.4	0	18.4	18.4	0.09	0	2.82	0.016	33	C	160	161
	Peanuts, all types, dry-roasted, salted / Arachides, tous les types, rôties/sec, salées	ounces	1	28.35	Day 2	Snack 2 - 3:00pm	165.8	6.713	6.098	2.268	1.185	14.1	1.954	0	15.3	0.641	49.9	186.5	230.5	0	0	0	2.211	0.124	0.028	3.834	41.1	0	41.1	41.1	0.073	0	4.448	0.001	33	A	160	161
	Psyllium seed, husks	1 cup, husks (66g)	0.094	6.2	Day 1	Breakfast - 6:10am	12.4	0.285	4.796	4.796	0	0.031	0.004	0	18.2	0	0	0	7.755	0	0	0	0	0	0	0	0	0	0	0	0	0	0.004	0	33	B	160	161
	Psyllium seed, husks	1 cup, husks (66g)	0.094	6.2	Day 1	Dinner - 5:45pm	12.4	0.285	4.796	4.796	0	0.031	0.004	0	18.2	0	0	0	7.755	0	0	0	0	0	0	0	0	0	0	0	0	0	0.004	0	33	B	160	161
	Psyllium seed, husks	1 cup, husks (66g)	0.094	6.2	Day 2	Breakfast - 6:30am	12.4	0.285	4.796	4.796	0	0.031	0.004	0	18.2	0	0	0	7.755	0	0	0	0	0	0	0	0	0	0	0	0	0	0.004	0	33	B	160	161
	Psyllium seed, husks	1 cup, husks (66g)	0.094	6.2	Day 2	Dinner - 6:15pm	12.4	0.285	4.796	4.796	0	0.031	0.004	0	18.2	0	0	0	7.755	0	0	0	0	0	0	0	0	0	0	0	0	0	0.004	0	33	B	160	161
	Psyllium seed, husks	1 cup, husks (66g)	0.063	4.16	Day 3	Breakfast - 8:15am	8.316	0.191	3.214	3.214	0	0.021	0.002	0	12.2	0	0	0	5.197	0	0	0	0	0	0	0	0	0	0	0	0	0	0.003	0	33	B	160	161
	Psyllium seed, husks	1 cup, husks (66g)	0.063	4.16	Day 3	Dinner - 5:00pm	8.316	0.191	3.214	3.214	0	0.021	0.002	0	12.2	0	0	0	5.197	0	0	0	0	0	0	0	0	0	0	0	0	0	0.003	0	33	B	160	161
	Seeds, chia seeds, dried / Graines de chia, déshydratées	15ml (10.8g)	0.5	5.4	Day 3	Lunch - 12:00pm	26.5	0.844	2.369	2.037	0	1.661	0.172	0	34.1	0.4168	18.09	8.643	1.026	0.108	0	0	0.027	0.0335	0	0.4768	2.646	0	0	0.4768	0.4768	0	0.313	0.948	33	B	160	161
	Peanut butter, reduced sodium and reduced sugar	1 tablespoon (16g)	3	48	Day 1	Lunch - 12:20pm	303.4	11.5	10.5	3.168	4.459	24	3.704	0	19.7	0.912	76.3	358.6	97.4	0	0	0	4.344	0.058	0.053	6.571	44.2	0	44.2	44.2	0.216	0	6.767	0.037	33	C	160	161
	Chestnuts, roasted	grams	21	21	Day 3	Breakfast - 8:00am	51.4	0.666	11.1	1.071	2.226	0.462	0.087	0	6.09	0.191	6.93	124.3	0.42	0.21	5.46	0	0.105	0.051	0.037	0.282	14.7	0	14.7	14.7	0.104	0	0.163	0.02	33	A	160	161
	Hemp Hearts - Raw shelled hemp seeds - Manitoba Harvest	1 tablespoon (15g)	1	15	Day 2	Snack 1 - 11:30am	57	5	1	1.5	0	6.5	0.75	0	10	1.674	28	165.75	0.6	0	0	0	0	0.1995	0.582	0.927	16.5	0	16.5	16.5	0.165	0	4.15	1.284	33	B	160	161
	Hemp Hearts - Raw shelled hemp seeds - Manitoba Harvest	grams	25	25	Day 1	Breakfast - 8:15am	95	8.33	1.667	1.667	0	10.833	1.25	0	16.7	2.79	46.7	276.25	1	0	0	0	0	0.333	0.97	1.545	27.5	0	27.5	27.5	0.1375	0	6.918	2.14	33	B	160	161
	Peanut butter, reduced sodium and reduced sugar	grams	10	10	Day 2	Snack 2 - 4:00pm	63.2	2.4	2.183	0.66	0.929	4.99	0.772	0	4.1	0.19	15.9	74.7	20.3	0	0	0	0.905	0.012	0.011	1.369	9.2	0	9.2	9.2	0.045	0	1.41	0.008	33	C	160	161
	Seeds, chia seeds, dried / Graines de chia, déshydratées	grams	10	10	Day 3	Lunch - 12:30pm	49	1.562	4.385	3.77	0	3.075	0.318	0	63.1	0.772	33.5	16	1.9	0.2	0	0	0.05	0.062	0	0.883	4.9	0	0	0.883	0.883	0	0.578	1.755	33	B	160	161
	Seeds, flaxseeds (linseeds), whole and ground / Graines, lin, entières et moulues	grams	5	5	Day 3	Lunch - 12:30pm	26.7	0.99	1.444	1.395	0.078	2.08	0.183	0	16.7	0.25	18.3	41.6	1.395	0	0.03	0	0.016	0.082	0.008	0.154	4.35	0	4.35	4.35	0.024	0	0.321	1.157	33	B	160	161
	Nuts, almonds, dried, unblanched / Noix, amandes, séchées, non blanchies	grams	6	6	Day 3	Breakfast	34.6	1.273	1.3	0.732	0.233	2.965	0.224	0	15.8	0.223	16.1	42.3	0.06	0	0	0	1.573	0.013	0.061	0.203	3	0	3	3	0.009	0	0.724	0	33	A	160	161
	Hemp Hearts - Raw shelled hemp seeds - Manitoba Harvest	1 tablespoon (15g)	0.667	10	Day 1	Breakfast - 8:00am	38	3.33	0.667	0.667	0	4.33	0.5	0	6.67	1.16	18.7	110.5	0.4	0	0	0	0	0.133	0.388	0.618	11	0	11	11	0.055	0	2.767	0.856	33	B	160	161
	Nuts, pine nuts, pignolia, dried / Noix, noix de pins, pignons (pignes), séchées	15ml (8.56g)	0.33	2.82	Day 3	Lunch - 12:10pm	19	0.387	0.369	0.105	0.101	1.931	0.138	0	0.452	0.156	7.089	16.9	0.056	0.028	0.023	0	0.264	0.01	0.006	0.124	0.96	0	0.96	0.96	0.003	0	0.936	0.005	33	A	160	161
	Nuts, walnuts, English or Persian, dried / Noix, Grenoble, séchées	125ml chopped / 125ml haché (61.81g)	0.5	30.91	Day 3	Breakfast - 7:00am	202.4	4.707	4.237	2.071	0.807	20.2	1.893	0	30.3	0.899	48.8	136.3	0.618	0.309	0.402	0	0.216	0.105	0.046	0.348	30.3	0	30.3	30.3	0.166	0	11.8	2.806	33	A	160	161
	Seeds, pumpkin and squash seed kernels, dried / Graines, citrouille et courge, graines, déshydratées	1 ounce (28.35g)	1	28.35	Day 1	Breakfast - 8:00am	158.5	8.57	3.036	1.701	0.397	13.9	2.455	0	13	2.5	167.8	229.4	1.985	0.284	0.539	0	0.618	0.077	0.043	1.414	16.4	0	16.4	16.4	0.041	0	5.871	0.034	33	B	160	161
	Nuts, almonds, dried, unblanched / Noix, amandes, séchées, non blanchies	grams	28	28	Day 1	Lunch - 3:30pm	161.3	5.942	6.068	3.416	1.089	13.8	1.045	0	73.9	1.042	75	197.4	0.28	0	0	0	7.342	0.059	0.284	0.948	14	0	14	14	0.04	0	3.377	0.002	33	A	160	161
	Kraft - 100% Natural Peanut Butter	1 tbsp (15g)	2	30	Day 1	Breakfast - 7:00am	180	8	6	2	2	14	2	0	0	0.72	55	207	0.12	0	0	0	2.2	0	0	4.256	46	0	46	46	0.081	0	4.938	0	33	C	160	161
	Kraft - 100% Natural Peanut Butter	grams	28	28	Day 2	Breakfast - 7:00am	168	7.467	5.6	1.867	1.867	13.1	1.867	0	0	0.672	55	207	1.68	0	0	0	2.2	0	0	4.256	46	0	46	46	0.081	0	4.938	0	33	C	160	161
	Kraft - 100% Natural Peanut Butter	grams	28	28	Day 3	Breakfast - 11:00am	168	7.467	5.6	1.867	1.867	13.1	1.867	0	0	0.672	55	207	1.68	0	0	0	2.2	0	0	4.256	46	0	46	46	0.081	0	4.938	0	33	C	160	161
	Seeds, pumpkin and squash seed kernels, dried / Graines, citrouille et courge, graines, déshydratées	1 ounce (28.35g)	0.15	4.25	Day 2	Lunch - 1:20pm	23.8	1.286	0.455	0.255	0.06	2.086	0.368	0	1.956	0.375	25.2	34.4	0.298	0.043	0.081	0	0.093	0.012	0.007	0.212	2.466	0	2.466	2.466	0.006	0	0.881	0.005	33	B	160	161
	Seeds, sunflower seed kernels, dried / Graines, tournesol, graines, déshydratées	100ml hulled / 100ml écalées (60.86g)	0.15	9.13	Day 1	Lunch - 12:40pm	53.4	1.897	1.826	0.785	0.239	4.698	0.407	0	7.121	0.479	29.7	58.9	0.822	0.274	0.128	0	3.211	0.135	0.032	0.761	20.7	0	20.7	20.7	0.123	0	2.104	0.005	33	B	160	161
	Kraft - Peanut Butter Smooth/cremeux	1 tbsp (15g)	1	15	Day 2	Breakfast - 9:00am	90	3	4	1	1	8	2	0	0	0.36	55	91.5	60	0	0	0	1.49	0	0	2.145	14	0	14	14	0.072	0	2.01	0	33	C	160	161
	Kraft - Peanut Butter Smooth/cremeux	1 tbsp (15g)	1	15	Day 3	Breakfast - 10:30am	90	3	4	1	1	8	2	0	0	0.36	55	91.5	60	0	0	0	1.49	0	0	2.145	14	0	14	14	0.072	0	2.01	0	33	C	160	161
	Nuts, almonds, dry roasted, unblanched, salted / Noix, amandes, rôties à sec, non blanchies, salées	grams	196	196	Day 2	Breakfast - 9:00am	1172	43.3	37.8	23.1	9.604	103.5	7.932	0	521.4	8.84	560.6	1462	664.4	0	0	0	51	0.145	1.684	7.546	64.7	0	64.7	64.7	0.247	0	24.8	0.012	33	A	160	161
	Nuts, almonds, dry roasted, unblanched, salted / Noix, amandes, rôties à sec, non blanchies, salées	grams	22	22	Day 1	Lunch - 1:00pm	131.6	4.86	4.244	2.596	1.078	11.6	0.89	0	58.5	0.992	62.9	164.1	74.6	0	0	0	5.72	0.016	0.189	0.847	7.26	0	7.26	7.26	0.028	0	2.783	0.001	33	A	160	161
	Nuts, almonds, dry roasted, unblanched, salted / Noix, amandes, rôties à sec, non blanchies, salées	grams	15	15	Day 2	Lunch - 2:00pm	89.7	3.314	2.894	1.77	0.735	7.925	0.607	0	39.9	0.677	42.9	111.9	50.9	0	0	0	3.9	0.011	0.129	0.578	4.95	0	4.95	4.95	0.019	0	1.897	0.001	33	A	160	161
	Seeds, pumpkin and squash seed kernels, dried / Graines, citrouille et courge, graines, déshydratées	grams	12	12	Day 3	Dinner - 8:00pm	67.1	3.628	1.285	0.72	0.168	5.886	1.039	0	5.52	1.058	71	97.1	0.84	0.12	0.228	0	0.262	0.033	0.018	0.598	6.96	0	6.96	6.96	0.017	0	2.485	0.014	33	B	160	161
	Peanut butter, smooth type, fat and sugar added / Beurre d'arachides crémeux, gras et sucre ajoutés	2 Tbsp (36g)	0.666	23.76	Day 2	Breakfast	141.95	6.0469	4.726	1.3498	2.2219	12.1431	2.4803	0	7.5	0.405	16.9333	156	112.5	0	0	0	0.965333	0.0126667	0.012	1.46	9.8	0	9.8	9.8	0.048	0	1.504	0.008	33	C	160	161
	Adam's - Organic Peanut Butter	1 tbsp (15g)	1	15	Day 1	Lunch - 1:00pm	105	4	3	1	1	8	1	0	0.75	0.18	23.622	111.135	45	0	0	0	1.34664	0.01767	0.01674	2.0367	13.671	0	13.671	13.671	0.06696	0	2.09808	0.01116	33	C	160	161
	Adam's - Organic Peanut Butter	1 tbsp (15g)	1	15	Day 2	Lunch - 11:45am	105	4	3	1	1	8	1	0	0.75	0.18	23.622	111.135	45	0	0	0	1.34664	0.01767	0.01674	2.0367	13.671	0	13.671	13.671	0.06696	0	2.09808	0.01116	33	C	160	161
	Adam's - Organic Peanut Butter	1 tbsp (15g)	1	15	Day 3	Lunch - 2:30pm	105	4	3	1	1	8	1	0	0.75	0.18	23.622	111.135	45	0	0	0	1.34664	0.01767	0.01674	2.0367	13.671	0	13.671	13.671	0.06696	0	2.09808	0.01116	33	C	160	161
	Nuts, almonds, dry roasted, unblanched, salted / Noix, amandes, rôties à sec, non blanchies, salées	grams	45	45	Day 3	Lunch - 12:30pm	269.1	9.94	8.68	5.31	2.205	23.8	1.821	0	119.7	2.03	128.7	335.7	152.6	0	0	0	11.7	0.033	0.387	1.732	14.8	0	14.8	14.8	0.057	0	5.692	0.003	33	A	160	161
	Nuts, almonds, dry roasted, unblanched, salted / Noix, amandes, rôties à sec, non blanchies, salées	grams	39	39	Day 2	Snack 1 - 8:30am	233.2	8.615	7.523	4.602	1.911	20.6	1.578	0	103.7	1.759	111.5	290.9	132.2	0	0	0	10.1	0.029	0.335	1.501	12.9	0	12.9	12.9	0.049	0	4.933	0.002	33	A	160	161
	Nuts, walnuts, English or Persian, dried / Noix, Grenoble, séchées	125ml chopped / 125ml haché (61.81g)	1	61.81	Day 2	Lunch - 1:00pm	404.9	9.414	8.475	4.141	1.613	40.3	3.787	0	60.6	1.799	97.7	272.6	1.236	0.618	0.804	0	0.433	0.211	0.093	0.695	60.6	0	60.6	60.6	0.332	0	23.5	5.613	33	A	160	161
	Barney Butter Bare - Smooth Almond Butter	1 tbsp (16g)	0.5	8	Day 1	Breakfast - 9:00am	45	2	2	1	0.5	4	0.5	0	20	0.27	18.5	59.84	21.4	0	0	0	1.5	0.00328	0.072	0.2524	4.24	0	4.24	4.24	0.00824	0	1.088	0.00056	33	C	160	161
	Nuts, almond butter, plain / Noix, beurre d'amandes, nature	Tbsp (16g)	1	16	Day 3	Breakfast - 9:00am	179.5	4.275	6.016	1.049	1	16.8	1.588	0	76.5	1.049	85.9	214.9	3.119	0	0.198	0	3	0.038	0.173	0.815	18.4	0	18.4	18.4	0.022	0	3.368	0.12	33	C	160	161
	Seeds, pumpkin and squash seed kernels, dried / Graines, citrouille et courge, graines, déshydratées	grams	16	16	Day 2	Lunch - 1:00pm	89.4	4.837	1.714	0.96	0.224	7.848	1.385	0	7.36	1.411	94.7	129.4	1.12	0.16	0.304	0	0.349	0.044	0.024	0.798	9.28	0	9.28	9.28	0.023	0	3.314	0.019	33	B	160	161
	Nuts, almonds, dried, unblanched / Noix, amandes, séchées, non blanchies	100ml slices / 100ml tranches (40.15g)	0.5	20.08	Day 3	Breakfast - 7:00am	115.6	4.26	4.35	2.449	0.781	9.922	0.749	0	53	0.747	53.8	141.5	0.201	0	0	0	5.264	0.042	0.204	0.68	10	0	10	10	0.029	0	2.421	0.001	33	A	160	161
	Seeds, chia seeds, dried / Graines de chia, déshydratées	15ml (10.8g)	0.25	2.7	Day 2	Breakfast - 7:15am	13.2	0.422	1.184	1.018	0	0.831	0.086	0	17	0.2084	9.045	4.322	0.513	0.054	0	0	0.0135	0.01675	0	0.2384	1.323	0	0	0.2384	0.2384	0	0.156	0.474	33	B	160	161
	Kraft - Peanut Butter Smooth/cremeux	1 tbsp (15g)	1	15	Day 2	Breakfast - 9:30am	90	3	4	1	1	8	2	0	0	0.36	55	91.5	60	0	0	0	1.49	0	0	2.145	14	0	14	14	0.072	0	2.01	0	33	C	160	161
	Seeds, chia seeds, dried / Graines de chia, déshydratées	15ml (10.8g)	0.5	5.4	Day 2	Breakfast - 6:45am	26.5	0.844	2.369	2.037	0	1.661	0.172	0	34.1	0.4168	18.09	8.643	1.026	0.108	0	0	0.027	0.0335	0	0.4768	2.646	0	0	0.4768	0.4768	0	0.313	0.948	33	B	160	161
	Seeds, chia seeds, dried / Graines de chia, déshydratées	15ml (10.8g)	0.25	2.7	Day 3	Breakfast - 6:00am	13.2	0.422	1.184	1.018	0	0.831	0.086	0	17	0.2084	9.045	4.322	0.513	0.054	0	0	0.0135	0.01675	0	0.2384	1.323	0	0	0.2384	0.2384	0	0.156	0.474	33	B	160	161
	Nuts, almonds, toasted, unblanched / Noix, amandes, grillées, non blanchies	100 grams (100g)	1	100	Day 2	Snack 1 - 8:30am	589	20.4	22.9	28.832	0	50.8	4.812	0	283	4.92	305	773	11	0	0.7	0	50.3	0.131	0.601	2.829	64.1	0	64.1	64.1	0.074	0	10.2	0.364	33	A	160	161
	Nuts, almonds, toasted, unblanched / Noix, amandes, grillées, non blanchies	100 grams (100g)	1	100	Day 3	Snack 1 - 10:00am	589	20.4	22.9	28.832	0	50.8	4.812	0	283	4.92	305	773	11	0	0.7	0	50.3	0.131	0.601	2.829	64.1	0	64.1	64.1	0.074	0	10.2	0.364	33	A	160	161
	Nuts, almonds, toasted, unblanched / Noix, amandes, grillées, non blanchies	1 ounce (28.35g)	2.08	58.97	Day 1	Snack 1 - 4:30pm	347.3	12	13.5	16.932	0	29.9	2.838	0	166.9	2.901	179.9	455.8	6.486	0	0.413	0	29.6	0.077	0.354	1.668	37.8	0	37.8	37.8	0.044	0	6.018	0.215	33	A	160	161
	Hemp Hearts - Raw shelled hemp seeds - Manitoba Harvest	1 tablespoon (15g)	0.5	7.5	Day 2	Breakfast - 8:30am	42.5	2.5	0.5	0.75	0	3.25	0.375	0	5	0.837	14	82.88	0.3	0	0	0	0	0.0998	0.291	0.464	8.25	0	8.25	8.25	0.0413	0	2.073	0.642	33	B	160	161
	Kirkland - Natural Creamy Peanut Butter	2 tbsp (32g)	0.75	24	Day 1	Lunch - 12:30pm	138.8	6	5.25	2.25	1.5	12	1.5	0	7.5	0.405	16.9333	156	112.5	0	0	0	0.965333	0.0126667	0.012	1.46	9.8	0	9.8	9.8	0.048	0	1.504	0.008	33	C	160	161
	Psyllium seed, husks	1 cup, ground (134g)	0.094	12.6	Day 1	Breakfast - 8:30am	25.2	0.579	9.737	9.737	0	0.063	0.008	0	37	0	0	0	15.7	0	0	0	0	0	0	0	0	0	0	0	0	0	0.008	0	33	B	160	161
	Psyllium seed, husks	1 cup, ground (134g)	0.094	12.6	Day 1	Dinner - 5:30pm	25.2	0.579	9.737	9.737	0	0.063	0.008	0	37	0	0	0	15.7	0	0	0	0	0	0	0	0	0	0	0	0	0	0.008	0	33	B	160	161
	Psyllium seed, husks	1 cup, ground (134g)	0.094	12.6	Day 2	Breakfast - 8:30am	25.2	0.579	9.737	9.737	0	0.063	0.008	0	37	0	0	0	15.7	0	0	0	0	0	0	0	0	0	0	0	0	0	0.008	0	33	B	160	161
	Psyllium seed, husks	1 cup, ground (134g)	0.094	12.6	Day 2	Dinner - 4:45pm	25.2	0.579	9.737	9.737	0	0.063	0.008	0	37	0	0	0	15.7	0	0	0	0	0	0	0	0	0	0	0	0	0	0.008	0	33	B	160	161
	Psyllium seed, husks	1 cup, ground (134g)	0.094	12.6	Day 3	Breakfast - 10:00am	25.2	0.579	9.737	9.737	0	0.063	0.008	0	37	0	0	0	15.7	0	0	0	0	0	0	0	0	0	0	0	0	0	0.008	0	33	B	160	161
	Psyllium seed, husks	1 cup, ground (134g)	0.094	12.6	Day 3	Dinner - 6:30pm	25.2	0.579	9.737	9.737	0	0.063	0.008	0	37	0	0	0	15.7	0	0	0	0	0	0	0	0	0	0	0	0	0	0.008	0	33	B	160	161
	Seeds, chia seeds, dried / Graines de chia, déshydratées	15ml (10.8g)	0.5	5.4	Day 2	Breakfast - 8:30am	26.5	0.844	2.369	2.037	0	1.661	0.172	0	34.1	0.4168	18.09	8.643	1.026	0.108	0	0	0.027	0.0335	0	0.4768	2.646	0	0	0.4768	0.4768	0	0.313	0.948	33	B	160	161
	Kraft - Peanut Butter Smooth/cremeux	1 tbsp (15g)	2	30	Day 2	Lunch	180	6	8	2	2	16	4	0	0	0.72	110	183	120	0	0	0	2.98	0	0	4.29	28	0	28	28	0.144	0	4.02	0	33	C	160	161
	Kraft - Peanut Butter Smooth/cremeux	grams	11	11	Day 3	Breakfast - 9:30am	66	2.2	2.933	0.733	0.733	5.867	1.467	0	0	0.264	40.3333	67.1	44	0	0	0	1.09267	0	0	1.573	10.2667	0	10.2667	10.2667	0.0528	0	1.474	0	33	C	160	161
	Nuts, pistachio nuts, raw / Noix, pistaches, crues	1 ounce (28.35g)	0.24	6.8	Day 1	Snack 1 - 2:30pm	38.2	1.379	1.872	0.599	0.521	3.088	0.378	0	7.144	0.267	8.233	69.7	0.068	1.429	0.381	0	0.156	0.059	0.011	0.088	3.47	0	3.47	3.47	0.116	0	0.918	0.018	33	A	160	161
	Peanut butter, smooth type, fat and sugar added / Beurre d'arachides crémeux, gras et sucre ajoutés	1 ounce (28.35g)	3	85.05	Day 3	Lunch - 12:00pm	500.9	21.3	16.7	4.763	7.842	42.9	8.753	0	36.6	1.59	131	552	14.5	0	0	0	7.646	0.062	0.089	11.4	62.9	0	62.9	62.9	0.462	0	11.7	0.065	33	C	160	161
	Peanut butter, smooth type, fat and sugar added / Beurre d'arachides crémeux, gras et sucre ajoutés	1 ounce (28.35g)	3	85.05	Day 3	Lunch - 12:00pm	500.9	21.3	16.7	4.763	7.842	42.9	8.753	0	36.6	1.59	131	552	14.5	0	0	0	7.646	0.062	0.089	11.4	62.9	0	62.9	62.9	0.462	0	11.7	0.065	33	C	160	161
	Joe's - Texas Hold'em Mix	grams	10	10	Day 1	Breakfast - 8:00am	56	1.8	3.2	0.8	1	4	0.6	0	8	0.54	199.36	431.76	0.8	0.7952	0.3976	0	6.496	0.4004	0.3864	1.5596	44.52	0	44.52	44.52	0.1428	0	8.8396	0.1988	33	A	160	161
	Nuts, walnuts, English or Persian, dried / Noix, Grenoble, séchées	grams	10	10	Day 2	Breakfast - 8:15am	65.5	1.523	1.371	0.67	0.261	6.521	0.613	0	9.8	0.291	15.8	44.1	0.2	0.1	0.13	0	0.07	0.034	0.015	0.113	9.8	0	9.8	9.8	0.054	0	3.809	0.908	33	A	160	161
	Nuts, walnuts, English or Persian, dried / Noix, Grenoble, séchées	grams	10	10	Day 3	Breakfast - 8:30am	65.5	1.523	1.371	0.67	0.261	6.521	0.613	0	9.8	0.291	15.8	44.1	0.2	0.1	0.13	0	0.07	0.034	0.015	0.113	9.8	0	9.8	9.8	0.054	0	3.809	0.908	33	A	160	161
	Nuts, almond butter, plain / Noix, beurre d'amandes, nature	grams	7	7	Day 1	Breakfast - 6:19am	44.3	1.056	1.485	0.259	0.5	4.137	0.392	0	18.9	0.259	21.2	53.1	0.77	0	0.049	0	1.5	0.009	0.043	0.201	4.55	0	4.55	4.55	0.005	0	0.832	0.03	33	C	160	161
	Nuts, almonds, dry roasted, unblanched, salted / Noix, amandes, rôties à sec, non blanchies, salées	100ml whole / 100ml entier (58.33g)	0.4	23.33	Day 2	Snack 2 - 8:00pm	139.5	5.154	4.5	2.753	1.143	12.3	0.944	0	62.1	1.052	66.7	174	79.1	0	0	0	6.066	0.017	0.2	0.898	7.699	0	7.699	7.699	0.029	0	2.951	0.001	33	A	160	161
	Nuts, almonds, dry roasted, unblanched, salted / Noix, amandes, rôties à sec, non blanchies, salées	100ml whole / 100ml entier (58.33g)	0.4	23.33	Day 2	Snack 2 - 8:00pm	139.5	5.154	4.5	2.753	1.143	12.3	0.944	0	62.1	1.052	66.7	174	79.1	0	0	0	6.066	0.017	0.2	0.898	7.699	0	7.699	7.699	0.029	0	2.951	0.001	33	A	160	161
	Nuts, almonds, dry roasted, unblanched, salted / Noix, amandes, rôties à sec, non blanchies, salées	grams	9	9	Day 3	Breakfast - 9:00am	53.8	1.988	1.736	1.062	0.441	4.755	0.364	0	23.9	0.406	25.7	67.1	30.5	0	0	0	2.34	0.007	0.077	0.346	2.97	0	2.97	2.97	0.011	0	1.138	0.001	33	A	160	161
	Nuts, pecans, dried / Noix, pacanes, séchées	100ml chopped / 100ml haché (46.07g)	1	46.07	Day 1	Snack 1 - 12:30pm	318.3	4.225	6.468	4.423	1.829	33.2	2.847	0	32.2	1.166	55.7	188.9	0	1.382	0.507	0	0.645	0.304	0.06	0.538	10.1	0	10.1	10.1	0.097	0	9.503	0.454	33	A	160	161
	Psyllium seed, husks	grams	5	5	Day 1	Lunch - 1:30pm	10	0.23	3.865	3.865	0	0.025	0.003	0	14.7	0	0	0	6.25	0	0	0	0	0	0	0	0	0	0	0	0	0	0.003	0	33	B	160	161
	Psyllium seed, husks	grams	5	5	Day 3	Breakfast - 9:00am	10	0.23	3.865	3.865	0	0.025	0.003	0	14.7	0	0	0	6.25	0	0	0	0	0	0	0	0	0	0	0	0	0	0.003	0	33	B	160	161
	Seeds, chia seeds, dried / Graines de chia, déshydratées	grams	5	5	Day 3	Lunch - 12:00pm	24.5	0.781	2.192	1.885	0	1.538	0.159	0	31.6	0.386	16.75	8	0.95	0.1	0	0	0.025	0.031	0	0.4415	2.45	0	0	0.4415	0.4415	0	0.289	0.878	33	B	160	161
	Seeds, flaxseeds (linseeds), whole and ground / Graines, lin, entières et moulues	grams	6	6	Day 1	Lunch - 1:30pm	32	1.188	1.733	1.674	0.093	2.496	0.22	0	20	0.3	22	49.9	1.674	0	0.036	0	0.019	0.099	0.01	0.185	5.22	0	5.22	5.22	0.028	0	0.385	1.388	33	B	160	161
	Seeds, flaxseeds (linseeds), whole and ground / Graines, lin, entières et moulues	grams	5	5	Day 3	Lunch - 12:00pm	26.7	0.99	1.444	1.395	0.078	2.08	0.183	0	16.7	0.25	18.3	41.6	1.395	0	0.03	0	0.016	0.082	0.008	0.154	4.35	0	4.35	4.35	0.024	0	0.321	1.157	33	B	160	161
	Kraft - Peanut Butter Smooth/cremeux	1 tbsp (15g)	2	30	Day 1	Lunch - 12:00pm	180	6	8	2	2	16	4	0	0	0.72	110	183	120	0	0	0	2.98	0	0	4.29	28	0	28	28	0.144	0	4.02	0	33	C	160	161
	Kraft - Peanut Butter Smooth/cremeux	grams	20	20	Day 2	Breakfast - 7:30am	120	4	5.333	1.333	1.333	10.7	2.667	0	0	0.48	73.3333	122	80	0	0	0	1.98667	0	0	2.86	18.6667	0	18.6667	18.6667	0.096	0	2.68	0	33	C	160	161
	Kraft - Peanut Butter Smooth/cremeux	grams	20	20	Day 3	Lunch - 12:45pm	120	4	5.333	1.333	1.333	10.7	2.667	0	0	0.48	73.3333	122	80	0	0	0	1.98667	0	0	2.86	18.6667	0	18.6667	18.6667	0.096	0	2.68	0	33	C	160	161
	Peanut butter, smooth type, fat and sugar added / Beurre d'arachides crémeux, gras et sucre ajoutés	1 ounce (28.35g)	1	28.35	Day 1	Lunch - 1:30pm	167	7.113	5.559	1.588	2.614	14.3	2.918	0	12.2	0.53	43.7	184	4.82	0	0	0	2.549	0.021	0.03	3.8	21	0	21	21	0.154	0	3.91	0.022	33	C	160	161
	Kraft - 100% Natural Peanut Butter	1 tbsp (15g)	2	30	Day 1	Breakfast - 4:00am	180	8	6	2	2	14	2	0	0	0.72	55	207	0.12	0	0	0	2.2	0	0	4.256	46	0	46	46	0.081	0	4.938	0	33	C	160	161
	Kraft - 100% Natural Peanut Butter	1 tbsp (15g)	2	30	Day 2	Breakfast - 6:00am	180	8	6	2	2	14	2	0	0	0.72	55	207	0.12	0	0	0	2.2	0	0	4.256	46	0	46	46	0.081	0	4.938	0	33	C	160	161
	Kraft - Peanut Butter Smooth/cremeux	1 tbsp (15g)	1	15	Day 1	Breakfast - 9:30am	90	3	4	1	1	8	2	0	0	0.36	55	91.5	60	0	0	0	1.49	0	0	2.145	14	0	14	14	0.072	0	2.01	0	33	C	160	161
	Kraft - Peanut Butter Smooth/cremeux	1 tbsp (15g)	1	15	Day 2	Breakfast - 7:30am	90	3	4	1	1	8	2	0	0	0.36	55	91.5	60	0	0	0	1.49	0	0	2.145	14	0	14	14	0.072	0	2.01	0	33	C	160	161
	Kirkland - Natural Creamy Peanut Butter	grams	50	50	Day 3	Breakfast - 11:30am	289.1	12.5	10.9	4.688	3.125	25	3.125	0	15.6	0.844	35.2778	325	234.4	0	0	0	2.01111	0.0263889	0.025	3.04167	20.4167	0	20.4167	20.4167	0.1	0	3.13333	0.0166667	33	C	160	161
	Kraft - Peanut Butter Smooth/cremeux	1 tbsp (15g)	2	30	Day 2	Breakfast	180	6	8	2	2	16	4	0	13.0607	0.72	46.7143	197.143	120	0	0	0	2.73	0.0214286	0.0321429	4.07143	22.5	0	22.5	22.5	0.165	0	4.18929	0.0235714	33	C	160	161
	Nuts, almonds, dry roasted, unblanched, salted / Noix, amandes, rôties à sec, non blanchies, salées	100ml whole / 100ml entier (58.33g)	1	58.33	Day 1	Breakfast - 8:30am	348.8	12.9	11.3	6.882	2.858	30.8	2.36	0	155.1	2.631	166.8	435.1	197.7	0	0	0	15.2	0.043	0.501	2.246	19.2	0	19.2	19.2	0.073	0	7.378	0.003	33	A	160	161
	Kraft - Peanut Butter Smooth/cremeux	1 tbsp (15g)	1	15	Day 1	Breakfast - 9:00am	90	3	4	1	1	8	2	0	6.53036	0.36	23.3571	98.5714	60	0	0	0	1.365	0.0107143	0.0160714	2.03571	11.25	0	11.25	11.25	0.0825	0	2.09464	0.0117857	33	C	160	161
	Nuts, almonds, dried, unblanched / Noix, amandes, séchées, non blanchies	100ml slices / 100ml tranches (40.15g)	0.75	30.11	Day 2	Breakfast - 8:00am	173.5	6.39	6.526	3.674	1.171	14.9	1.124	0	79.5	1.12	80.7	212.3	0.301	0	0	0	7.896	0.064	0.305	1.019	15.1	0	15.1	15.1	0.043	0	3.632	0.002	33	A	160	161
	Peanut butter, chunk type, fat and sugar added / Beurre d'arachides croquant, gras et sucre ajoutés	100ml (109.04g)	0.25	27.26	Day 3	Breakfast - 7:30am	160.6	6.559	5.88	2.181	2.293	13.6	2.203	0	12.3	0.518	43.6	203.1	4.634	0	0	0	1.717	0.029	0.03	3.734	25.1	0	25.1	25.1	0.114	0	4.011	0.023	33	C	160	161
	Hemp Hearts - Raw shelled hemp seeds - Manitoba Harvest	1 tablespoon (15g)	2	30	Day 2	Breakfast - 6:30am	170	10	3	3	1	13	1.5	0	20	4.2	56	331.5	3	0	0	0	0	0.399	1.164	1.85	33	0	33	33	0.165	0	8.301	2.568	33	B	160	161
	Psyllium seed, husks	1 cup, ground (134g)	0.094	12.6	Day 1	Breakfast - 7:00am	25.2	0.579	9.737	9.737	0	0.063	0.008	0	37	0	0	0	15.7	0	0	0	0	0	0	0	0	0	0	0	0	0	0.008	0	33	B	160	161
	Psyllium seed, husks	1 cup, ground (134g)	0.094	12.6	Day 1	Dinner - 6:15pm	25.2	0.579	9.737	9.737	0	0.063	0.008	0	37	0	0	0	15.7	0	0	0	0	0	0	0	0	0	0	0	0	0	0.008	0	33	B	160	161
	Psyllium seed, husks	1 cup, ground (134g)	0.094	12.6	Day 2	Breakfast - 6:30am	25.2	0.579	9.737	9.737	0	0.063	0.008	0	37	0	0	0	15.7	0	0	0	0	0	0	0	0	0	0	0	0	0	0.008	0	33	B	160	161
	Psyllium seed, husks	1 cup, ground (134g)	0.094	12.6	Day 2	Dinner - 5:30pm	25.2	0.579	9.737	9.737	0	0.063	0.008	0	37	0	0	0	15.7	0	0	0	0	0	0	0	0	0	0	0	0	0	0.008	0	33	B	160	161
	Psyllium seed, husks	1 cup, ground (134g)	0.094	12.6	Day 3	Breakfast - 8:30am	25.2	0.579	9.737	9.737	0	0.063	0.008	0	37	0	0	0	15.7	0	0	0	0	0	0	0	0	0	0	0	0	0	0.008	0	33	B	160	161
	Psyllium seed, husks	1 cup, ground (134g)	0.094	12.6	Day 3	Dinner - 6:30pm	25.2	0.579	9.737	9.737	0	0.063	0.008	0	37	0	0	0	15.7	0	0	0	0	0	0	0	0	0	0	0	0	0	0.008	0	33	B	160	161
	Seeds, flaxseeds (linseeds), whole and ground / Graines, lin, entières et moulues	125ml (88.76g)	0.2	17.75	Day 2	Breakfast - 6:30am	94.8	3.515	5.127	4.953	0.275	7.385	0.65	0	59.3	0.888	65.1	147.5	4.953	0	0.107	0	0.057	0.292	0.029	0.547	15.4	0	15.4	15.4	0.084	0	1.14	4.107	33	B	160	161
	Peanut butter, smooth type, fat and sugar added / Beurre d'arachides crémeux, gras et sucre ajoutés	1 ounce (28.35g)	1	28.35	Day 2	Lunch - 12:00pm	167	7.113	5.559	1.588	2.614	14.3	2.918	0	12.2	0.53	43.7	184	4.82	0	0	0	2.549	0.021	0.03	3.8	21	0	21	21	0.154	0	3.91	0.022	33	C	160	161
	Nuts, cashew nuts, raw / Noix, noix d'acajou (cajous, anacardes), crues	grams	10	10	Day 1	Breakfast - 6:15am	55.3	1.822	3.27	0.33	0.591	4.385	0.778	0	3.7	0.668	29.2	66	1.2	0	0.05	0	0.09	0.042	0.006	0.106	2.5	0	2.5	2.5	0.042	0	0.778	0.006	33	A	160	161
	Nuts, cashew nuts, raw / Noix, noix d'acajou (cajous, anacardes), crues	grams	10	10	Day 2	Breakfast - 8:00am	55.3	1.822	3.27	0.33	0.591	4.385	0.778	0	3.7	0.668	29.2	66	1.2	0	0.05	0	0.09	0.042	0.006	0.106	2.5	0	2.5	2.5	0.042	0	0.778	0.006	33	A	160	161
	Nuts, cashew nuts, raw / Noix, noix d'acajou (cajous, anacardes), crues	grams	10	10	Day 3	Breakfast - 8:00am	55.3	1.822	3.27	0.33	0.591	4.385	0.778	0	3.7	0.668	29.2	66	1.2	0	0.05	0	0.09	0.042	0.006	0.106	2.5	0	2.5	2.5	0.042	0	0.778	0.006	33	A	160	161
	Seeds, sunflower seed butter / Graines, tournesol, beurre	grams	11	11	Day 1	Lunch - 12:30pm	63.7	2.163	3.016	0.65155	0.19837	5.25	0.55	0	13.4	0.522	40.6	7.92	0.33	0.33	0.297	0	0.14774	0.036	0.031	0.585	26.1	0	26.1	26.1	0.088	0	3.456	0.007	33	B	160	161
	Nuts, almond butter, plain / Noix, beurre d'amandes, nature	grams	17	17	Day 2	Breakfast - 8:09am	107.6	2.564	3.607	0.629	1	10	0.952	0	45.9	0.629	51.5	128.9	1.87	0	0.119	0	3	0.023	0.104	0.489	11	0	11	11	0.013	0	2.019	0.072	33	C	160	161
	Nuts, almonds, toasted, unblanched / Noix, amandes, grillées, non blanchies	grams	15	15	Day 2	Dinner - 5:15pm	88.4	3.057	3.436	4.32203	0	7.616	0.722	0	42.4	0.738	45.8	116	1.65	0	0.105	0	7.54	0.02	0.09	0.424	9.615	0	9.615	9.615	0.011	0	1.531	0.055	33	A	160	161
	Hemp Hearts - Raw shelled hemp seeds - Manitoba Harvest	grams	5	5	Day 1	Dinner - 7:30PM	28.3333	1.66667	0.5	0.5	0.166667	2.16667	0.25	0	3.33333	0.7	9.33333	55.25	0.5	0	0	0	0	0.0665	0.194	0.308333	5.5	0	5.5	5.5	0.0275	0	1.3835	0.428	33	B	160	161
	Hemp Hearts - Raw shelled hemp seeds - Manitoba Harvest	grams	5	5	Day 2	Dinner - 7:30PM	28.3333	1.66667	0.5	0.5	0.166667	2.16667	0.25	0	3.33333	0.7	9.33333	55.25	0.5	0	0	0	0	0.0665	0.194	0.308333	5.5	0	5.5	5.5	0.0275	0	1.3835	0.428	33	B	160	161
	Seeds, pumpkin and squash seed kernels, dried / Graines, citrouille et courge, graines, déshydratées	1 ounce (28.35g)	0.5	14.18	Day 1	Dinner - 7:30PM	79.2	4.285	1.518	0.851	0.198	6.953	1.227	0	6.52	1.25	83.9	114.7	0.992	0.142	0.269	0	0.309	0.039	0.022	0.707	8.222	0	8.222	8.222	0.02	0	2.936	0.017	33	B	160	161
	Seeds, pumpkin and squash seed kernels, dried / Graines, citrouille et courge, graines, déshydratées	1 ounce (28.35g)	0.5	14.18	Day 2	Dinner - 7:30PM	79.2	4.285	1.518	0.851	0.198	6.953	1.227	0	6.52	1.25	83.9	114.7	0.992	0.142	0.269	0	0.309	0.039	0.022	0.707	8.222	0	8.222	8.222	0.02	0	2.936	0.017	33	B	160	161
	Seeds, pumpkin and squash seed kernels, dried / Graines, citrouille et courge, graines, déshydratées	1 ounce (28.35g)	0.5	14.18	Day 3	Lunch - 12:00PM	79.2	4.285	1.518	0.851	0.198	6.953	1.227	0	6.52	1.25	83.9	114.7	0.992	0.142	0.269	0	0.309	0.039	0.022	0.707	8.222	0	8.222	8.222	0.02	0	2.936	0.017	33	B	160	161
	Hummus, commercial / Hoummos (hommos), commercial	175ml (184.91g)	1	184.91	Day 1	Lunch	307	14.6	26.4	11.1	0	17.8	2.657	0	70.3	4.512	131.3	421.6	700.8	3.698	0	0	0	0.333	0.118	1.076	153.5	0	153.5	153.5	0.37	0	0	0	217	A	160	162
	Hummus, commercial / Hoummos (hommos), commercial	grams	90	90	Day 3	Lunch - 12:00pm	149.4	7.11	12.9	5.4	0	8.64	1.293	0	34.2	2.196	63.9	205.2	341.1	1.8	0	0	0	0.162	0.058	0.524	74.7	0	74.7	74.7	0.18	0	0	0	217	A	160	162
	Summerfresh - Roasted Garlic Hummus	2 tbsp (30g)	0.5	15	Day 2	Breakfast - 9:00am	30	1	3	1	0.5	1.75	0.629621	0	10	0.36	31.1137	99.9052	57.5	0.876303	0.6	0	0	0.07891	0.0279621	0.254976	36.3744	0	36.3744	36.3744	0.0876777	0	0	0	217	A	160	162
	Hummus, commercial / Hoummos (hommos), commercial	175ml (184.91g)	1	184.91	Day 1	Lunch - 12:00pm	307	14.6	26.4	11.1	0	17.8	2.657	0	70.3	4.512	131.3	421.6	700.8	3.698	0	0	0	0.333	0.118	1.076	153.5	0	153.5	153.5	0.37	0	0	0	217	A	160	162
	Summerfresh - Caramelized Onion Hummus	grams	75	75	Day 2	Dinner - 4:00pm	150	5	15	5	2.5	10	1.04937	0	50	1.8	51.8562	166.509	400	1.46051	3	0	0	0.131517	0.0466035	0.424961	60.624	0	60.624	60.624	0.14613	0	0	0	217	A	160	162
	Summerfresh - Caramelized Onion Hummus	grams	45	45	Day 3	Dinner - 6:00pm	90	3	9	3	1.5	6	0.629621	0	30	1.08	31.1137	99.9052	240	0.876303	1.8	0	0	0.07891	0.0279621	0.254976	36.3744	0	36.3744	36.3744	0.0876777	0	0	0	217	A	160	162
	Beans, black, boiled / Haricots, noirs, bouillis	grams	30	30	Day 2	Dinner - 6:00pm	39.6	2.658	7.113	2.091	0	0.162	0.042	0	8.1	0.63	21	106.5	0.3	0	0	0	0.024	0.073	0.018	0.152	44.7	0	44.7	44.7	0.021	0	0.038	0.032	37	A	160	162
	Beans, black, boiled / Haricots, noirs, bouillis	100 grams (100g)	1	100	Day 2	Dinner - 6:30pm	132	8.86	23.7	6.97	0	0.54	0.139	0	27	2.1	70	355	1	0	0	0	0.08	0.244	0.059	0.505	149	0	149	149	0.069	0	0.126	0.105	37	A	160	162
	Tofu, regular, firm or extra firm, raw (prepared with calcium sulphate and magnesium chloride) / Tofu, régulier, ferme ou extra ferme, nature (préparé avec sulphate de calcium et chlorure de magnésium)	grams	100	100	Day 2	Dinner - 5:30pm	70	14.1	1.69	0	0.6	7.2	0.863	0	155.9	1.61	37	148	17	0	0.2	0	0.01	0.06	0.063	0.101	19	0	19	19	0.071	0	1.598	0.181	37	B	160	162
	Tofu, regular, firm or extra firm, raw (prepared with calcium sulphate and magnesium chloride) / Tofu, régulier, ferme ou extra ferme, nature (préparé avec sulphate de calcium et chlorure de magnésium)	grams	85	85	Day 1	Dinner - 6:15pm	59.5	12	1.437	0	0.51	6.12	0.734	0	132.5	1.368	31.4	125.8	14.4	0	0.17	0	0.008	0.051	0.054	0.086	16.2	0	16.2	16.2	0.06	0	1.358	0.154	37	B	160	162
	Vegetarian burger or patty, meatless, no bun - veggie burger, made with soy and/or vegetables and grains	grams	120	120	Day 2	Lunch - 12:30pm	212.4	18.8	17.1	5.88	1.284	7.56	1.728	6	163.2	2.892	67.2	399.6	682.8	1.2	5.4	0	0.276	3.181	0.293	4.504	148.8	0	148.8	148.8	0.364	2.412	2.328	0	37	B	160	162
	Beans, black, boiled / Haricots, noirs, bouillis	1 ounce (28.35g)	0.5	14.18	Day 3	Dinner - 6:00pm	18.7	1.256	3.361	0.988	0	0.077	0.02	0	3.827	0.298	9.923	50.3	0.142	0	0	0	0.011	0.035	0.008	0.072	21.1	0	21.1	21.1	0.01	0	0.018	0.015	37	A	160	162
	Chickpeas (garbanzo beans, bengal gram), boiled, salted / Pois chiches, (garbanzo), bouillis, salés	175ml (121.3g)	0.5	60.65	Day 1	Dinner - 6:00pm	99.5	5.374	16.6	2.766	2.911	1.571	0.163	0	29.7	1.753	29.1	176.5	147.4	0.606	0.788	0	0.212	0.07	0.038	0.319	104.3	0	104.3	104.3	0.084	0	0.675	0.026	37	A	160	162
	Bean sprouts, raw (soybean or mung)	1 cup, mung (104g)	1	104	Day 3	Dinner - 6:00pm	31.2	3.162	6.178	1.872	4.295	0.187	0.048	0	13.5	0.946	21.8	155	6.24	1.04	13.7	0	0.104	0.087	0.129	0.779	63.4	0	63.4	63.4	0.092	0	0.044	0.017	37	A	160	162
	Beans, black, boiled / Haricots, noirs, bouillis	100 grams (100g)	1	100	Day 2	Dinner - 6:30pm	132	8.86	23.7	6.97	0	0.54	0.139	0	27	2.1	70	355	1	0	0	0	0.08	0.244	0.059	0.505	149	0	149	149	0.069	0	0.126	0.105	37	A	160	162
	Hilarys Eat Well - World's Best Veggie Burger	1 burger (90.71g)	1	90.71	Day 1	Lunch - 12:00pm	190	4	27	4	1.374	7	5	0	20	1.8	50.4	115	350	0.9	4.05	0	0.207	2.38575	0.21975	3.378	111.6	0	111.6	111.6	0.273	0	1.746	0	37	B	160	162
	Sol - Original Veggie Burger	1 burger (68g)	1	68	Day 3	Dinner - 5:30pm	100	12	6	3	0.7276	3	0.9792	3.4	92.48	1.6388	38.08	226.44	386.92	0.68	3.06	0	0.1564	1.80257	0.166033	2.55227	84.32	0	84.32	84.32	0.206267	1.3668	1.3192	0	37	B	160	162
	Beans, black, boiled / Haricots, noirs, bouillis	grams	100	100	Day 1	Dinner - 7:00pm	132	8.86	23.7	6.97	0	0.54	0.139	0	27	2.1	70	355	1	0	0	0	0.08	0.244	0.059	0.505	149	0	149	149	0.069	0	0.126	0.105	37	A	160	162
	Beans, baked, canned, unsalted / Haricots, au four, conserve, sans sel	100 grams (100g)	1.5	150	Day 3	Dinner - 6:00pm	157.5	7.2	30.7	8.25	11.7	0.6	0.154	0	75	0.435	48	444	1.5	7.5	4.65	0	0.225	0.225	0.09	0.645	36	0	36	36	0.195	0	0.14	0.117	37	A	160	162
	Hilary's - Root Veggie Burger	grams	85	85	Day 1	Dinner - 6:00pm	168.7	3.748	23.4	2.811	1.29767	6.559	4.685	0	18.7	1.349	47.6	98.4	271.7	0.85	2.249	0	0.1955	2.25321	0.207542	3.19033	105.4	0	105.4	105.4	0.257833	0	1.649	0	37	B	160	162
	Heinz - Baked Beans With Tomato Sauce	1/2 cup (130g)	1.5	195	Day 1	Lunch - 2:00pm	150	8.999	25.5	7.5	10.5	0.312	0	0	60	2.161	66.3	575.25	390	0	1.872	0	0.195	0.0975	0.0897	0.9633	29.25	0	29.25	29.25	0.12285	0	0.2223	0.07605	217	A	160	163
	Chili w/beans, canned	1 cup (256g)	1.5	384	Day 2	Dinner - 6:00pm	395.5	23.5	50.8	12.7	6.336	14.4	4.351	65.3	180.5	13.2	172.8	1402	1624	65.3	6.528	0	1.997	0.184	0.403	1.375	88.3	0	88.3	88.3	0.507	0	0.549	0.403	217	A	160	163
	Chili w/beans, canned	1 cup (256g)	1	256	Day 3	Dinner - 5:30pm	263.7	15.7	33.9	8.448	4.224	9.626	2.9	43.5	120.3	8.781	115.2	934.4	1083	43.5	4.352	0	1.331	0.123	0.269	0.916	58.9	0	58.9	58.9	0.338	0	0.366	0.269	217	A	160	163
	Falafel, homemade / Falafel, fait maison	grams	60	60	Day 3	Dinner - 5:30pm	199.8	7.986	19.1	4.68	1.96	10.7	1.43	0	32.4	2.052	49.2	351	176.4	0.6	0.96	0	0	0.088	0.1	0.626	55.8	9	46.8	62.1	0.075	0	0.297	0.067	217	A	160	163
	Fontaine Sante - Roated Red Pepper Hummus	grams	50	50	Day 1	Lunch - 12:30pm	116.7	3.334	8.334	1.666	1.666	8.334	1.666	0	33.3	1.2	0.355	114	200	0	4	0	0	0.09	0	0	41.5	0	41.5	41.5	0.1	0	0	0	217	A	160	163
	Fontaine Sante - Roated Red Pepper Hummus	grams	64	64	Day 1	Lunch - 12:45am	149.3	4.267	10.7	2.133	2.133	10.7	2.133	0	42.7	1.536	45.44	145.92	256	0	5.12	0	0	0.115	0	0	53.12	0	53.12	53.12	0.128	0	0	0	217	A	160	163
	Falafel, homemade / Falafel, fait maison	100 grams (100g)	1	100	Day 1	Lunch - 12:00pm	333	13.3	31.8	7.8	0	17.8	2.383	0	54	3.42	82	585	294	1	1.6	0	0	0.146	0.166	1.044	93	15	78	103.5	0.125	0	0.495	0.111	217	A	160	163
	Beans, chili, barbeque, ranch style, cooked	1 cup (253g)	2	506	Day 2	Dinner - 6:00pm	490.8	25.3	85.5	21.3	26.6	5.06	0.734	0	156.9	9.412	227.7	2277	3668	5.06	8.602	0	1.063	0.202	0.759	1.822	131.6	0	131.6	131.6	1.366	0.051	1.093	1.715	217	A	160	163
	Beans, chili, barbeque, ranch style, cooked	1 cup (253g)	2	506	Day 3	Lunch - 12:00pm	490.8	25.3	85.5	21.3	26.6	5.06	0.734	0	156.9	9.412	227.7	2277	3668	5.06	8.602	0	1.063	0.202	0.759	1.822	131.6	0	131.6	131.6	1.366	0.051	1.093	1.715	217	A	160	163
	Fontaine Sante - Roated Red Pepper Hummus	2 tbsp (30g)	3	90	Day 1	Lunch - 12:30pm	210	6	15	3	3	15	3	0	60	2.16	0.639	205.2	360	0	7.2	0	0	0.162	0	0	74.7	0	74.7	74.7	0.18	0	0	0	217	A	160	163
	Fontaine Sante - Roated Red Pepper Hummus	2 tbsp (30g)	2	60	Day 2	Lunch - 12:00pm	140	4	10	2	2	10	2	0	40	1.44	0	0	240	0	4.8	0	0	0	0	0	0	0	0	0	0	0	0	0	217	A	160	163
	Fontaine Sante - Roated Red Pepper Hummus	2 tbsp (30g)	1.5	45	Day 3	Lunch - 1:30pm	105	3	7.5	1.5	1.5	7.5	1.5	0	30	1.08	0.3195	102.6	180	0	3.6	0	0	0.081	0	0	37.35	0	37.35	37.35	0.09	0	0	0	217	A	160	163
	Snacks, trail mix, regular / Grignotises, mélange montagnard, régulier	grams	10	10	Day 2	Breakfast - 8:30am	46.2	1.38	4.49	0.67	0	2.94	0.555	0	7.8	0.305	15.8	68.5	22.9	0.1	0.14	0	0.84	0.046	0.02	0.471	7.1	0	7.1	7.1	0.03	0	0.958	0.007	226	A	160	164
	Snacks, trail mix, regular / Grignotises, mélange montagnard, régulier	grams	10	10	Day 3	Breakfast - 8:00am	46.2	1.38	4.49	0.67	0	2.94	0.555	0	7.8	0.305	15.8	68.5	22.9	0.1	0.14	0	0.84	0.046	0.02	0.471	7.1	0	7.1	7.1	0.03	0	0.958	0.007	226	A	160	164
	Made in Nature - Figgy Pops Tart Cheery Fig Supersnacks	3 pops (36g)	0.333	11.99	Day 3	Lunch - 2:00pm	63.3	1.332	6.66	1.332	4.329	3.663	1.165	0	13.3	0.48	2.97	79.9	23.3	0.99	0.4	0	0.0715	0.01738	0.02387	0.2057	1.1	0	1.1	1.1	0.00825	0.0099	0.275	0.02002	226	A	160	164
	Nut mixture with dried fruit and seeds	1 cup (140g)	0.125	17.5	Day 3	Lunch - 12:30pm	88	2.823	6.744	1.172	3.577	6.309	0.779	0	14.9	0.49	24.8	123.4	1.225	0	0.175	0	1.486	0.03	0.036	1.076	16.3	0	16.3	16.3	0.058	0	2.555	0.132	226	A	160	164
	Carrot Cake Energy Balls - homemade	1 serving (100g)	1	100	Day 2	Breakfast - 9:30AM	128	2	22	4	14	6	1	31	20	0.72	24.75	70	4	1.8	3.33333	0	0.595833	0.144833	0.198917	1.71417	9.16667	0	9.16667	9.16667	0.06875	0.0825	2.29167	0.166833	226	A	160	164
	Carrot Cake Energy Balls - homemade	1 serving (100g)	1	100	Day 2	Lunch - 2:00PM	128	2	22	4	14	6	1	31	20	0.72	24.75	70	4	1.8	3.33333	0	0.595833	0.144833	0.198917	1.71417	9.16667	0	9.16667	9.16667	0.06875	0.0825	2.29167	0.166833	226	A	160	164
	Squash, summer, zucchini, raw / Courge d'été, courgette (zucchini), crue	grams	15	15	Day 1	Breakfast - 9:00am	2.55	0.182	0.466	0.15	0.375	0.048	0.013	0	2.4	0.056	2.7	39.2	1.2	1.5	2.685	0	0.018	0.007	0.014	0.068	3.6	0	3.6	3.6	0.024	0	0.005	0.009	36	M	180	181
	Squash, summer, zucchini, raw / Courge d'été, courgette (zucchini), crue	grams	15	15	Day 2	Breakfast - 8:00am	2.55	0.182	0.466	0.15	0.375	0.048	0.013	0	2.4	0.056	2.7	39.2	1.2	1.5	2.685	0	0.018	0.007	0.014	0.068	3.6	0	3.6	3.6	0.024	0	0.005	0.009	36	M	180	181
	Squash, winter, butternut, baked / Courge d'hiver, courge musquée, cuite au four	grams	120	120	Day 2	Dinner - 7:30pm	48	1.08	12.6	2.016	2.364	0.108	0.023	0	49.2	0.72	34.8	340.8	4.8	669.6	18.1	0	1.548	0.086	0.02	1.163	22.8	0	22.8	22.8	0.149	0	0.017	0.029	36	M	180	181
	Squash, winter, butternut, baked / Courge d'hiver, courge musquée, cuite au four	100ml cubes / 100ml en cubes (86.64g)	0.25	21.66	Day 1	Dinner - 7:00pm	8.664	0.195	2.272	0.364	0.427	0.019	0.004	0	8.881	0.13	6.282	61.5	0.866	120.9	3.271	0	0.279	0.016	0.004	0.21	4.116	0	4.116	4.116	0.027	0	0.003	0.005	36	M	180	181
	Squash, summer, zucchini, raw / Courge d'été, courgette (zucchini), crue	grams	249	249	Day 3	Dinner - 7:15pm	42.3	3.013	7.744	2.49	6.225	0.797	0.209	0	39.8	0.921	44.8	649.9	19.9	24.9	44.6	0	0.299	0.112	0.234	1.123	59.8	0	59.8	59.8	0.406	0	0.075	0.152	36	M	180	181
	Squash, summer, zucchini, boiled, drained / Courge d'été, courgette (zucchini), bouillie, égouttée	grams	75	75	Day 3	Dinner - 6:15pm	11.2	0.855	2.017	0.75	2.228	0.27	0.054	0	13.5	0.278	14.2	198	2.25	42	9.675	0	0.09	0.026	0.018	0.382	21	0	21	21	0.06	0	0.044	0.07	36	M	180	181
	Squash, summer, zucchini, boiled, drained / Courge d'été, courgette (zucchini), bouillie, égouttée	grams	60	60	Day 3	Dinner - 6:30pm	9	0.684	1.614	0.6	1.782	0.216	0.043	0	10.8	0.222	11.4	158.4	1.8	33.6	7.74	0	0.072	0.021	0.014	0.306	16.8	0	16.8	16.8	0.048	0	0.035	0.056	36	M	180	181
	Squash, summer, zucchini, boiled, drained / Courge d'été, courgette (zucchini), bouillie, égouttée	grams	40	40	Day 2	Dinner - 6:00pm	6	0.456	1.076	0.4	1.188	0.144	0.029	0	7.2	0.148	7.6	105.6	1.2	22.4	5.16	0	0.048	0.014	0.01	0.204	11.2	0	11.2	11.2	0.032	0	0.023	0.038	36	M	180	181
	Squash, summer, zucchini, raw / Courge d'été, courgette (zucchini), crue	100ml chopped / 100ml haché (52.41g)	0.25	13.1	Day 1	Dinner - 6:30pm	2.227	0.159	0.407	0.131	0.328	0.042	0.011	0	2.096	0.048	2.358	34.2	1.048	1.31	2.345	0	0.016	0.006	0.012	0.059	3.145	0	3.145	3.145	0.021	0	0.004	0.008	36	M	180	181
	Beans, string, yellow, cooked, NS as to form, NS as to fat added in cooking - wax beans	grams	102	102	Day 1	Dinner - 6:30pm	54.1	1.846	7.711	3.264	1.51	2.509	0.513	0	45.9	1.255	24.5	292.7	322.3	34.7	9.486	0	1.224	0.072	0.096	0.6	32.6	0	32.6	32.6	0.195	0.408	0.944	0.189	36	A	180	181
	Beans, string, yellow, cooked, NS as to form, NS as to fat added in cooking - wax beans	grams	29	29	Day 3	Lunch - 12:30pm	15.4	0.525	2.192	0.928	0.429	0.713	0.146	0	13	0.357	6.96	83.2	91.6	9.86	2.697	0	0.348	0.021	0.027	0.171	9.28	0	9.28	9.28	0.055	0.116	0.268	0.054	36	A	180	181
	Vege, Squash, Spaghetti, baked or boiled w/salt, drained	grams	276	276	Day 2	Snack 1 - 1:30pm	74.5	1.822	17.8	3.864	6.983	0.718	0.171	0	58	0.938	30.4	322.9	701	16.6	9.66	0	0.331	0.105	0.061	2.236	22.1	0	22.1	22.1	0.273	0	0.13	0.215	36	M	180	181
	Carrots, raw	grams	81	81	Day 1	Dinner - 7:00pm	33.2	0.753	7.76	2.268	3.839	0.194	0.03	0	26.7	0.243	9.72	259.2	55.9	676.4	4.779	0	0.535	0.053	0.047	0.796	15.4	0	15.4	15.4	0.112	0	0.093	0.002	36	E	180	181
	Mixed salad greens, raw	1 cup, shredded or chopped (55g)	1.5	82.5	Day 2	Dinner - 7:00pm	14	1.254	2.648	1.65	0.759	0.198	0.031	0	39.6	0.957	21.4	240.1	23.9	207.9	13.1	0	0.503	0.056	0.072	0.319	89.1	0	89.1	89.1	0.069	0	0.032	0.062	36	H	180	181
	Pepper, sweet, red, sauteed / Poivron rouge, sauté	1 ounce (28.35g)	0.28	7.94	Day 1	Dinner	10.6	0.083	0.522	0.143	0.34	1.012	0.124	0	0.556	0.037	0.953	15.3	1.667	11	12.9	0	0.245	0.004	0.009	0.076	0.159	0	0.159	0.159	0.029	0	0.392	0.062	36	L	180	181
	Spinach, cooked, from fresh, fat not added in cooking	1 cup, fresh (180g)	1	180	Day 2	Lunch - 2:00pm	41.4	5.31	6.714	4.32	0.774	0.468	0.077	0	243	6.39	156.6	835.2	495	937.8	17.5	0	3.726	0.169	0.423	0.877	261	0	261	261	0.434	0	0.031	0.166	36	H	180	181
	Spinach, cooked, from fresh, fat not added in cooking	1 cup, fresh (180g)	1	180	Day 3	Breakfast - 9:30am	41.4	5.31	6.714	4.32	0.774	0.468	0.077	0	243	6.39	156.6	835.2	495	937.8	17.5	0	3.726	0.169	0.423	0.877	261	0	261	261	0.434	0	0.031	0.166	36	H	180	181
	Broccoli, raw / Brocoli, cru	grams	60	60	Day 1	Dinner - 6:00pm	20.4	1.692	3.984	1.44	1.02	0.222	0.023	0	28.2	0.438	12.6	189.6	19.8	18.6	53.5	0	0.468	0.043	0.07	0.383	37.8	0	37.8	37.8	0.105	0	0.01	0.013	36	B	180	181
	Brussels sprouts, raw / Choux de Bruxelles, crus	grams	40	40	Day 1	Dinner - 6:00pm	17.2	1.352	3.58	1.648	0.88	0.12	0.025	0	16.8	0.56	9.2	155.6	10	15.2	34	0	0.352	0.056	0.036	0.298	24.4	0	24.4	24.4	0.088	0	0.018	0.04	36	P	180	181
	Mixed salad greens, raw	grams	117	117	Day 3	Dinner - 6:00pm	19.9	1.778	3.756	2.34	1.076	0.281	0.044	0	56.2	1.357	30.4	340.5	33.9	294.8	18.6	0	0.714	0.08	0.102	0.453	126.4	0	126.4	126.4	0.098	0	0.046	0.088	36	H	180	181
	Peppers, sweet, red, sauteed	grams	29	29	Day 2	Dinner - 6:00pm	38.6	0.302	1.905	0.522	1.241	3.698	0.452	0	2.03	0.136	3.48	56	6.09	40	47.2	0	0.896	0.016	0.032	0.277	0.58	0	0.58	0.58	0.106	0	1.434	0.225	36	L	180	181
	Raw vegetable, NFS	grams	173	173	Day 3	Lunch - 11:30am	36.3	1.626	7.872	2.422	4.55	0.329	0.055	0	27.7	0.502	20.8	408.3	29.4	202.4	26.6	0	0.778	0.069	0.061	0.993	31.1	0	31.1	31.1	0.159	0	0.125	0.007	36	P	180	181
	Raw vegetable, NFS	grams	148	148	Day 2	Lunch - 11:30am	31.1	1.391	6.734	2.072	3.892	0.281	0.047	0	23.7	0.429	17.8	349.3	25.2	173.2	22.8	0	0.666	0.059	0.052	0.85	26.6	0	26.6	26.6	0.136	0	0.107	0.006	36	P	180	181
	Squash, winter, spaghetti, baked or boiled, drained / Courge d'hiver, spaghetti, au four ou bouillie, égouttée	grams	251	251	Day 3	Dinner - 6:00pm	67.8	1.657	16.2	3.514	6.35	0.653	0.156	0	52.7	0.853	27.6	293.7	45.2	15.1	8.785	0	0.301	0.095	0.055	2.033	20.1	0	20.1	20.1	0.248	0	0.118	0.196	36	M	180	181
	Vege, Corn Ears, Yellow, Sweet, raw	grams	30	30	Day 2	Dinner - 6:00pm	25.8	0.981	5.61	0.6	1.878	0.405	0.098	0	0.6	0.156	11.1	81	4.5	2.7	2.04	0	0.021	0.046	0.016	0.531	12.6	0	12.6	12.6	0.028	0	0.142	0.004	36	G	180	181
	Vege, Tomato, Red, ripe, whole, raw	grams	30	30	Day 2	Dinner - 6:00pm	5.4	0.264	1.167	0.36	0.789	0.06	0.008	0	3	0.081	3.3	71.1	1.5	12.6	4.11	0	0.162	0.011	0.006	0.178	4.5	0	4.5	4.5	0.024	0	0.024	0.001	36	N	180	181
	Cucumber, cooked, NS as to fat added in cooking	1 cup (185g)	0.25	46.25	Day 2	Dinner - 7:00pm	17.6	0.287	1.614	0.231	0.735	1.263	0.261	0	7.4	0.12	5.55	58.7	115.2	18.5	0.971	0	0.444	0.01	0.014	0.039	2.312	0	2.312	2.312	0.092	0.217	0.494	0.057	36	P	180	181
	Eggplant, cooked, NS as to fat added in cooking	1 cup, cubes (101g)	0.75	75.75	Day 2	Dinner - 7:00pm	43.9	0.598	6.257	1.818	2.28	2.295	0.462	0	5.302	0.182	7.575	88.6	374.2	30.3	0.909	0	1.045	0.055	0.015	0.428	9.848	0	9.848	9.848	0.195	0.386	0.901	0.108	36	P	180	181
	Peas, split, boiled / Pois cassés, bouillis	1 ounce (28.35g)	0.3	8.51	Day 3	Dinner - 7:00pm	10	0.709	1.795	0.248	0.247	0.033	0.005	0	1.191	0.11	3.062	30.8	0.17	0	0.034	0	0.003	0.016	0.005	0.076	5.528	0	5.528	5.528	0.004	0	0.012	0.002	36	K	180	181
	Pepper, sweet, red, sauteed / Poivron rouge, sauté	grams	25	25	Day 2	Dinner - 7:00pm	33.2	0.26	1.642	0.45	1.07	3.188	0.389	0	1.75	0.118	3	48.2	5.25	34.5	40.7	0	0.772	0.014	0.027	0.238	0.5	0	0.5	0.5	0.091	0	1.236	0.194	36	L	180	181
	Cucumber, raw / Concombre, cru	grams	50	50	Day 1	Lunch - 1:00pm	8	0.325	1.815	0.365	0.835	0.055	0.018	0	8	0.14	6.5	73.5	1	2.5	1.4	0	0.015	0.014	0.016	0.049	3.5	0	3.5	3.5	0.02	0	0.014	0.002	36	P	180	181
	Kale, scotch, raw / Chou à feuilles, non pommé, cru	grams	70	70	Day 2	Dinner - 7:10pm	29.4	1.96	5.824	1.19	0	0.42	0.055	0	143.5	2.1	61.6	315	49	108.5	91	0	0	0.049	0.042	0.91	19.6	0	19.6	19.6	0.159	0	0.083	0.108	36	C	180	181
	Onion, raw / Oignon, cru	grams	20	20	Day 2	Dinner - 7:10pm	8	0.22	1.868	0.34	0.848	0.02	0.008	0	4.6	0.042	2	29.2	0.8	0	1.48	0	0.004	0.009	0.005	0.023	3.8	0	3.8	3.8	0.024	0	0.003	0.001	36	J	180	181
	Vege, Tomato, Red, ripe, whole, raw	grams	36	36	Day 1	Lunch - 1:00pm	6.48	0.317	1.4	0.432	0.947	0.072	0.01	0	3.6	0.097	3.96	85.3	1.8	15.1	4.932	0	0.194	0.013	0.007	0.214	5.4	0	5.4	5.4	0.029	0	0.029	0.001	36	N	180	181
	Beets, canned, solids and liquid / Betteraves, conserve, solides et liquide	1 ounce (28.35g)	1	28.35	Day 2	Dinner - 7:00pm	8.505	0.207	2.024	0.34	1.851	0.026	0.004	0	5.103	0.207	5.103	45.1	40.5	0.284	0.794	0	0.009	0.003	0.011	0.043	8.222	0	8.222	8.222	0.016	0	0.008	0.001	36	P	180	181
	Brussels sprouts, raw / Choux de Bruxelles, crus	100ml (37.19g)	1	37.19	Day 2	Dinner - 7:00pm	16	1.257	3.329	1.532	0.818	0.112	0.023	0	15.6	0.521	8.555	144.7	9.298	14.1	31.6	0	0.327	0.052	0.033	0.277	22.7	0	22.7	22.7	0.081	0	0.017	0.037	36	P	180	181
[truncated: 2,591 more rows]

## Sheet: Codes
										FGCAT:	100	GRAIN PRODUCTS	notes		FGCAT:	140	MEAT, POULTRY, FISH	notes		FGCAT:	180	VEGETABLES	notes			FGCAT:	200	FRUIT	notes			FGcat:	260	FATS, oils AND SPREADS	notes
[truncated: 64 more rows]
